# Supplementary material for: Rare microbial relict sheds light on an ancient eukaryotic supergroup
Source: Research Square preprint supplement (doi:10.21203/rs.3.rs-5245440/v1), 2025-05-15
Supplement: Supplementary file 1 [file 582a023597e89b66d488af82.xlsx]

## Sheet: meiosis-specific genes
	DMC1	GEX1	HAP2	HOP1	HOP2	MND1	MER3	MSH4	MSH5	PCH2	Rec8	Spo11	ZIP4	Busco completeness
Ancoracysta twista	+	+	+	-	+	+	-	-	-	-	+	-	-	C:54.5%[S:48.6%,D:5.9%],F:7.1%,M:38.4%,n:255
Hemimastix kukwesjijk	+	+	-	-	-	+	-	-	-	-	+	-	-	C:46.3%[S:41.2%,D:5.1%],F:12.2%,M:41.5%,n:255
Meteora sporadica	+	-	+	-	+	+	-	+	-	+	+	-	-	C:87.1%[S:85.1%,D:2.0%],F:9.0%,M:3.9%,n:255
Nebulomonas marisrubri	+	+	+	-	+	+	+	-	-	+	+	-	-	C:94.2%[S:91.8%,D:2.4%],F:2.7%,M:3.1%,n:255
Nibbleromonas arcticus	-	-	-	-	-	+	-	-	-	-	-	-	-	C:54.9%[S:54.5%,D:0.4%],F:18.8%,M:26.3%,n:255
Nibbleromonas curacaus	+	+	-	-	-	+	-	-	-	+	+	-	-	C:84.3%[S:83.1%,D:1.2%],F:9.4%,M:6.3%,n:255
Nibbleromonas kosolapovi	-	+	-	-	-	-	-	-	+	+	+	-	-	C:70.2%[S:68.6%,D:1.6%],F:17.6%,M:12.2%,n:255
Nibbleromonas quarantinus	+	+	-	-	-	+	-	-	-	+	+	-	-	C:90.6%[S:88.6%,D:2.0%],F:4.3%,M:5.1%,n:255
Solarion arienae	+	+	+	-	+	+	-	+	-	+	+	+	-	C:94.9%[S:51.0%,D:43.9%],F:1.2%,M:3.9%,n:255
Spironema multiciliatum	+	+	-	-	+	-	-	-	-	+	+	-	-	C:54.5%[S:48.6%,D:5.9%],F:7.1%,M:38.4%,n:255
Ubysseya fretuma	-	+	-	-	-	-	-	-	-	+	+	-	-	C:55.3%[S:54.5%,D:0.8%],F:12.9%,M:31.8%,n:255
														C - Complete BUSCOs
														S - Complete and single-copy BUSCOs
														D - Complete and duplicated BUSCOs
														F - Fragmented BUSCOs
														M - Missing BUSCOs
														n - Total BUSCO groups searched
