# Supplementary material for: Rare microbial relict sheds light on an ancient eukaryotic supergroup
Source: Research Square preprint supplement (doi:10.21203/rs.3.rs-5245440/v1), 2025-05-15
Supplement: Supplementary file 2 [file 7a1c6f0ee8b5ba14828844df.docx]

**Supplementary Discussion 1:** Extended version of a taxonomic summary of *Solarion arienae* gen. et sp. nov..

**Supplementary Discussion 2:** Extended discussion on phylogenomics and tree topology tests.

**Supplementary Table 1:** Approximately unbiased topology tests of maximum likelihood analysis.

**Supplementary Table 2:** Orthologous protein clusters of Disparia and their annotation.

**Supplementary Table 3:** Distribution of meiosis-specific genes in disparian species.

**Supplementary video 1:** Detailed view of the sun-like form of *Solarion arienae*. Real-time acquisition.

**Supplementary video 2:** Detailed view of the flagellated form of *Solarion arienae* and its movement. Real-time acquisition.

**Supplementary video 3:** Transformation of the sun-like form of *Solarion arienae* into the flagellated form. The acquisition time record (mm:ss) is in the lower-left corner.

**Supplementary video 4:** 3D model visualization of one half of the extrusome. The density (teal colour) around the inner cavity is not closed to ensure the visibility of the inner cavity in the model.

**Supplementary Data 1:** Maximum likelihood phylogenomic analysis based on the extended dataset (318 taxa) using LG+C60+G4_PMFS model.

**Supplementary Data 2:** Maximum Likelihood phylogenetic tree based on the extended dataset (318 taxa) using ELM+C60+G4_PMSF model.
