# Supplementary material for: Rare microbial relict sheds light on an ancient eukaryotic supergroup
Source: Research Square preprint supplement (doi:10.21203/rs.3.rs-5245440/v1), 2025-05-15
Supplement: Supplementary file 3 [file a92d9abce8c3ec307036396e.xlsx]

## Sheet: List of sources
Source Name	Species name	Source	Busco Completness
Ancoracysta_twista_EP00164.filt.fasta	Ancoracysta twista	Tikhonenkov et al. 2022 (doi.org/10.1038/s41586-022-05511-5)	C:54.5%[S:48.6%,D:5.9%],F:7.1%,M:38.4%,n:255
EP00696_Hemimastix_kukwesjijk.fasta	Hemimastix kukwesjijk	EukProt_v3 (https://doi.org/10.24072/pcjournal.173)	C:46.3%[S:41.2%,D:5.1%],F:12.2%,M:41.5%,n:255
EP00697_Spironema_sp_BW2.fasta	Spironema multicilliatum	EukProt_v3 (https://doi.org/10.24072/pcjournal.173)	C:54.5%[S:48.6%,D:5.9%],F:7.1%,M:38.4%,n:255
Colp-41.pep.nr90.filt.fa.gz	Nibbleromonas quarantinus	Tikhonenkov et al. 2022 (doi.org/10.1038/s41586-022-05511-5)	C:90.6%[S:88.6%,D:2.0%],F:4.3%,M:5.1%,n:255
Colp-4b.pep.nr90.filt.fa.gz	Nebulomonas marisrubri	Tikhonenkov et al. 2022 (doi.org/10.1038/s41586-022-05511-5)	C:94.2%[S:91.8%,D:2.4%],F:2.7%,M:3.1%,n:255
TD-3.pep.nr90.filt.fa.gz	Ubysseya fretuma	Tikhonenkov et al. 2022 (doi.org/10.1038/s41586-022-05511-5)	C:55.3%[S:54.5%,D:0.8%],F:12.9%,M:31.8%,n:255
Colp-32.pep.nr90.filt.fa.gz	Nibbleromonas kosolapovi	Tikhonenkov et al. 2022 (doi.org/10.1038/s41586-022-05511-5)	C:70.2%[S:68.6%,D:1.6%],F:17.6%,M:12.2%,n:255
Colp-45.pep.nr90.filt.fa.gz	Nibbleromonas arcticus	Tikhonenkov et al. 2022 (doi.org/10.1038/s41586-022-05511-5)	C:54.9%[S:54.5%,D:0.4%],F:18.8%,M:26.3%,n:255
Cur-5.pep.nr90.filt.fa.gz	Nibbleromonas curacaus	Tikhonenkov et al. 2022 (doi.org/10.1038/s41586-022-05511-5)	C:84.3%[S:83.1%,D:1.2%],F:9.4%,M:6.3%,n:255
DRR483122	Meteora sporadica SRT610	Eglit et al. 2024 (https://doi.org/10.1016/j.cub.2023.12.032)	C:87.1%[S:85.1%,D:2.0%],F:9.0%,M:3.9%,n:255
(this study)	Solarion arienae	predicted proteins from genomic contigs	C:94.9%[S:51.0%,D:43.9%],F:1.2%,M:3.9%,n:255
Not used
SRR24901927	Meteora sporadica LBC3	Eglit et al. 2024 (https://doi.org/10.1016/j.cub.2023.12.032)	C:82.0%[S:56.9%,D:25.1%],F:9.8%,M:8.2%,n:255
MetSpo_croco_eukpep.fasta	Meteora sporadica CRO19MET	Torruella et al. 2025 (10.1016/j.cub.2024.10.075)	C:84.8%[S:82.4%,D:2.4%],F:2.7%,M:12.5%,n:255
Cur-12.pep.nr90.filt.fa.gz	Nibbleromonas curacaus	Tikhonenkov et al. 2022 (doi.org/10.1038/s41586-022-05511-5)	C:71.4%[S:70.6%,D:0.8%],F:17.3%,M:11.3%,n:255
Cur-8.pep.nr90.filt.fa.gz	Nebulomonas marisrubri	Tikhonenkov et al. 2022 (doi.org/10.1038/s41586-022-05511-5)	C:67.9%[S:66.7%,D:1.2%],F:13.3%,M:18.8%,n:255
Colp-4c.pep.nr90.filt.fa.gz	Nebulomonas marisrubri	Tikhonenkov et al. 2022 (doi.org/10.1038/s41586-022-05511-5)	C:78.9%[S:76.9%,D:2.0%],F:10.6%,M:10.5%,n:255
Colp-44.pep.nr90.filt.fa.gz	Nibbleromonas quarantinus	Tikhonenkov et al. 2022 (doi.org/10.1038/s41586-022-05511-5)	C:76.1%[S:73.7%,D:2.4%],F:12.5%,M:11.4%,n:255
			C - Complete BUSCOs
			S - Complete and single-copy BUSCOs
			D - Complete and duplicated BUSCOs
			F - Fragmented BUSCOs
			M - Missing BUSCOs
			n - Total BUSCO groups searched

## Sheet: General Statistics
General Statics
Overlaps	1111
All clusters	27121
Single-copy clusters	112
All proteins	223328
All singletons	66116
Percentage of singletons	29.60%
Statistics per species
Species name	Proteins	Clusters	Singletons*
Nebulomonas_marisrubri	33195	10571	13231
Ancoracysta_twista	29713	9241	12351
Nibbleromonas_kosolapovi	27297	12277	8807
Nibbleromonas_curacaus	26605	14022	5377
Nibbleromonas_quarantinus	24009	14207	4138
Ubysseya_fretuma	19883	7456	7503
Nibbleromonas_arcticus	18717	8875	4908
Spironema_multiciliatum	13661	5241	3742
Meteora_sporadica	12016	5109	2569
Hemimastix_kukwesjijk	10188	4392	2320
Solarion_arienae	8044	4706	1170
*sequence files are aviable in figshare
https://doi.org/10.6084/m9.figshare.27182820

## Sheet: Single Copy Clusters (SCC)
Cluster ID	GO Annotation	Number of proteins	Swiss_Prot hit	Protein list
cluster2879	GO:0009414; P:response to water deprivation; IMP:UniProtKB	11	Q93VB2	Ancoracysta_twista|GFYU01000144_1_p1;Hemimastix_kukwesjijk|EP00696_Hemimastix_kukwesjijk_P016407;Meteora_sporadica|NODE_8718_length_864_cov_188_206725_g7206_i0;Nebulomonas_marisrubri|TRINITY_DN8827_c0_g1_TRINITY_DN8827_c0_g1_i1_g_53899_m_53899;Nibbleromonas_arcticus|TRINITY_DN4307_c0_g1_TRINITY_DN4307_c0_g1_i1_g_35269_m_35269;Nibbleromonas_curacaus|TRINITY_DN13159_c0_g1_TRINITY_DN13159_c0_g1_i1_g…
cluster2883	GO:0006606; P:protein import into nucleus; IDA:UniProtKB	11	Q9FZK4	Ancoracysta_twista|GFYU01000220_1_p2;Hemimastix_kukwesjijk|EP00696_Hemimastix_kukwesjijk_P012487;Meteora_sporadica|NODE_12263_length_433_cov_97_959677_g10501_i0;Nebulomonas_marisrubri|TRINITY_DN21682_c0_g1_TRINITY_DN21682_c0_g1_i1_g_98633_m_98633;Nibbleromonas_arcticus|TRINITY_DN2644_c0_g1_TRINITY_DN2644_c0_g1_i1_g_45516_m_45516;Nibbleromonas_curacaus|TRINITY_DN10877_c0_g1_TRINITY_DN10877_c0_g1_i…
cluster2884	GO:1902600; P:proton transmembrane transport; IEA:InterPro	11	Q9SP55	Ancoracysta_twista|GFYU01000239_1_p2;Hemimastix_kukwesjijk|EP00696_Hemimastix_kukwesjijk_P013599;Meteora_sporadica|NODE_6660_length_1219_cov_281_613126_g5232_i1;Nebulomonas_marisrubri|TRINITY_DN4205_c0_g1_TRINITY_DN4205_c0_g1_i1_g_6805_m_6805;Nibbleromonas_arcticus|TRINITY_DN1972_c0_g1_TRINITY_DN1972_c0_g1_i1_g_40565_m_40565;Nibbleromonas_curacaus|TRINITY_DN2124_c0_g1_TRINITY_DN2124_c0_g1_i1_g_34…
cluster2889	GO:0006511; P:ubiquitin-dependent protein catabolic process; IBA:GO_Central	11	Q2KII4	Ancoracysta_twista|GFYU01000398_1_p1;Hemimastix_kukwesjijk|EP00696_Hemimastix_kukwesjijk_P009632;Meteora_sporadica|NODE_12370_length_423_cov_397_585635_g10607_i0;Nebulomonas_marisrubri|TRINITY_DN31453_c0_g1_TRINITY_DN31453_c0_g1_i1_g_51645_m_51645;Nibbleromonas_arcticus|TRINITY_DN26980_c0_g1_TRINITY_DN26980_c0_g1_i1_g_24384_m_24384;Nibbleromonas_curacaus|TRINITY_DN9450_c0_g1_TRINITY_DN9450_c0_g1_…
cluster2897	GO:0016579; P:protein deubiquitination; TAS:Reactome	11	O00232	Ancoracysta_twista|GFYU01000586_1_p1;Hemimastix_kukwesjijk|EP00696_Hemimastix_kukwesjijk_P008211;Meteora_sporadica|NODE_5817_length_1371_cov_85_752672_g4743_i0;Nebulomonas_marisrubri|TRINITY_DN9359_c0_g1_TRINITY_DN9359_c0_g1_i1_g_50645_m_50645;Nibbleromonas_arcticus|TRINITY_DN2976_c0_g1_TRINITY_DN2976_c0_g1_i1_g_8035_m_8035;Nibbleromonas_curacaus|TRINITY_DN8899_c0_g1_TRINITY_DN8899_c0_g1_i1_g_542…
cluster2899	GO:0006415; P:translational termination; IBA:GO_Central	11	Q8LPJ4	Ancoracysta_twista|GFYU01000669_1_p1;Hemimastix_kukwesjijk|EP00696_Hemimastix_kukwesjijk_P008965;Meteora_sporadica|NODE_3807_length_1907_cov_121_498375_g3093_i0;Nebulomonas_marisrubri|TRINITY_DN12355_c0_g1_TRINITY_DN12355_c0_g1_i1_g_7557_m_7557;Nibbleromonas_arcticus|TRINITY_DN5567_c0_g1_TRINITY_DN5567_c0_g1_i1_g_14842_m_14842;Nibbleromonas_curacaus|TRINITY_DN3695_c0_g1_TRINITY_DN3695_c0_g1_i1_g_…
cluster2900	GO:0006412; P:translation; IEA:InterPro	11	P52810	Ancoracysta_twista|GFYU01000672_1_p2;Hemimastix_kukwesjijk|EP00696_Hemimastix_kukwesjijk_P016801;Meteora_sporadica|NODE_10009_length_687_cov_2678_731629_g8357_i0;Nebulomonas_marisrubri|TRINITY_DN5366_c0_g1_TRINITY_DN5366_c0_g1_i2_g_72939_m_72939;Nibbleromonas_arcticus|TRINITY_DN1718_c0_g1_TRINITY_DN1718_c0_g1_i1_g_44498_m_44498;Nibbleromonas_curacaus|TRINITY_DN10081_c0_g1_TRINITY_DN10081_c0_g1_i1…
cluster2901	GO:0016192; P:vesicle-mediated transport; IEA:UniProtKB-KW	11	Q54QY3	Ancoracysta_twista|GFYU01000706_1_p1;Hemimastix_kukwesjijk|EP00696_Hemimastix_kukwesjijk_P007147;Meteora_sporadica|NODE_8692_length_869_cov_21_486386_g7182_i0;Nebulomonas_marisrubri|TRINITY_DN6826_c0_g1_TRINITY_DN6826_c0_g1_i1_g_27135_m_27135;Nibbleromonas_arcticus|TRINITY_DN9390_c0_g1_TRINITY_DN9390_c0_g1_i1_g_49237_m_49237;Nibbleromonas_curacaus|TRINITY_DN8130_c0_g1_TRINITY_DN8130_c0_g1_i2_g_16…
cluster2903	GO:0009651; P:response to salt stress; IEP:TAIR	11	Q9LT08	Ancoracysta_twista|GFYU01000740_1_p1;Hemimastix_kukwesjijk|EP00696_Hemimastix_kukwesjijk_P007719;Meteora_sporadica|NODE_7180_length_1120_cov_120_898961_g5897_i0;Nebulomonas_marisrubri|TRINITY_DN9109_c0_g1_TRINITY_DN9109_c0_g1_i1_g_33411_m_33411;Nibbleromonas_arcticus|TRINITY_DN2391_c0_g1_TRINITY_DN2391_c0_g1_i1_g_34859_m_34859;Nibbleromonas_curacaus|TRINITY_DN598_c0_g1_TRINITY_DN598_c0_g1_i1_g_27…
cluster2905	GO:0006457; P:protein folding; IEA:InterPro	11	Q940P8	Ancoracysta_twista|GFYU01000743_1_p1;Hemimastix_kukwesjijk|EP00696_Hemimastix_kukwesjijk_P001318;Meteora_sporadica|NODE_2317_length_2598_cov_58_871108_g1879_i0;Nebulomonas_marisrubri|TRINITY_DN8472_c0_g1_TRINITY_DN8472_c0_g1_i1_g_12904_m_12904;Nibbleromonas_arcticus|TRINITY_DN2228_c0_g1_TRINITY_DN2228_c0_g1_i1_g_9722_m_9722;Nibbleromonas_curacaus|TRINITY_DN1947_c0_g1_TRINITY_DN1947_c0_g1_i1_g_660…
cluster2906	GO:0006511; P:ubiquitin-dependent protein catabolic process; IEA:InterPro	11	O04482	Ancoracysta_twista|GFYU01000749_1_p1;Hemimastix_kukwesjijk|EP00696_Hemimastix_kukwesjijk_P013033;Meteora_sporadica|NODE_6962_length_1158_cov_70_929809_g5718_i0;Nebulomonas_marisrubri|TRINITY_DN10214_c0_g1_TRINITY_DN10214_c0_g1_i1_g_14114_m_14114;Nibbleromonas_arcticus|TRINITY_DN9359_c0_g1_TRINITY_DN9359_c0_g1_i1_g_49183_m_49183;Nibbleromonas_curacaus|TRINITY_DN43654_c0_g1_TRINITY_DN43654_c0_g1_i1…
cluster2910	GO:0015031; P:protein transport; IEA:UniProtKB-KW	11	B0G185	Ancoracysta_twista|GFYU01000795_1_p1;Hemimastix_kukwesjijk|EP00696_Hemimastix_kukwesjijk_P016976;Meteora_sporadica|NODE_11210_length_541_cov_52_537500_g9471_i0;Nebulomonas_marisrubri|TRINITY_DN30164_c0_g1_TRINITY_DN30164_c0_g1_i1_g_34269_m_34269;Nibbleromonas_arcticus|TRINITY_DN902_c0_g1_TRINITY_DN902_c0_g1_i1_g_26586_m_26586;Nibbleromonas_curacaus|TRINITY_DN6706_c0_g1_TRINITY_DN6706_c0_g1_i1_g_9…
cluster2913	GO:0046686; P:response to cadmium ion; IEP:TAIR	11	Q9SF16	Ancoracysta_twista|GFYU01000806_1_p1;Hemimastix_kukwesjijk|EP00696_Hemimastix_kukwesjijk_P012503;Meteora_sporadica|NODE_3849_length_1891_cov_107_448634_g3124_i0;Nebulomonas_marisrubri|TRINITY_DN14093_c7_g1_TRINITY_DN14093_c7_g1_i1_g_1585_m_1585;Nibbleromonas_arcticus|TRINITY_DN1364_c0_g1_TRINITY_DN1364_c0_g1_i1_g_32837_m_32837;Nibbleromonas_curacaus|TRINITY_DN2406_c0_g1_TRINITY_DN2406_c0_g1_i1_g_…
cluster2918	GO:0051604; P:protein maturation by iron-sulfur cluster transfer; ISS:UniProtKB	11	Q28ID3	Ancoracysta_twista|GFYU01000850_1_p1;Hemimastix_kukwesjijk|EP00696_Hemimastix_kukwesjijk_P004600;Meteora_sporadica|NODE_7633_length_1042_cov_89_529052_g6274_i0;Nebulomonas_marisrubri|TRINITY_DN23158_c0_g1_TRINITY_DN23158_c0_g1_i1_g_3888_m_3888;Nibbleromonas_arcticus|TRINITY_DN10810_c0_g1_TRINITY_DN10810_c0_g1_i1_g_15553_m_15553;Nibbleromonas_curacaus|TRINITY_DN31354_c0_g1_TRINITY_DN31354_c0_g1_i1…
cluster2919	N/A	11	Q6PC91	Ancoracysta_twista|GFYU01000858_1_p2;Hemimastix_kukwesjijk|EP00696_Hemimastix_kukwesjijk_P011924;Meteora_sporadica|NODE_10224_length_659_cov_671_633779_g8551_i0;Nebulomonas_marisrubri|TRINITY_DN3684_c0_g1_TRINITY_DN3684_c0_g1_i2_g_13546_m_13546;Nibbleromonas_arcticus|TRINITY_DN1509_c0_g1_TRINITY_DN1509_c0_g1_i1_g_49057_m_49057;Nibbleromonas_curacaus|TRINITY_DN4726_c0_g1_TRINITY_DN4726_c0_g1_i1_g_…
cluster2920	GO:0034314; P:Arp2/3 complex-mediated actin nucleation; IEA:InterPro	11	P53490	Ancoracysta_twista|GFYU01000908_1_p1;Hemimastix_kukwesjijk|EP00696_Hemimastix_kukwesjijk_P008022;Meteora_sporadica|NODE_5959_length_1348_cov_376_824398_g4863_i0;Nebulomonas_marisrubri|TRINITY_DN9849_c0_g1_TRINITY_DN9849_c0_g1_i1_g_7378_m_7378;Nibbleromonas_arcticus|TRINITY_DN2679_c0_g1_TRINITY_DN2679_c0_g1_i1_g_45617_m_45617;Nibbleromonas_curacaus|TRINITY_DN16855_c0_g1_TRINITY_DN16855_c0_g1_i1_g_…
cluster2923	GO:0006412; P:translation; IEA:InterPro	11	P47198	Ancoracysta_twista|GFYU01000974_1_p1;Hemimastix_kukwesjijk|EP00696_Hemimastix_kukwesjijk_P010346;Meteora_sporadica|NODE_6803_length_1189_cov_1949_287234_g5581_i0;Nebulomonas_marisrubri|TRINITY_DN7228_c0_g1_TRINITY_DN7228_c0_g1_i2_g_47990_m_47990;Nibbleromonas_arcticus|TRINITY_DN8202_c0_g1_TRINITY_DN8202_c0_g1_i1_g_16162_m_16162;Nibbleromonas_curacaus|TRINITY_DN11784_c0_g1_TRINITY_DN11784_c0_g1_i3…
cluster2924	GO:0006508; P:proteolysis; IDA:dictyBase	11	Q54QR2	Ancoracysta_twista|GFYU01001014_1_p1;Hemimastix_kukwesjijk|EP00696_Hemimastix_kukwesjijk_P019928;Meteora_sporadica|NODE_8210_length_948_cov_165_214205_g6768_i0;Nebulomonas_marisrubri|TRINITY_DN9875_c0_g1_TRINITY_DN9875_c0_g1_i2_g_7241_m_7241;Nibbleromonas_arcticus|TRINITY_DN22654_c0_g1_TRINITY_DN22654_c0_g1_i1_g_7663_m_7663;Nibbleromonas_curacaus|TRINITY_DN7240_c0_g1_TRINITY_DN7240_c0_g1_i1_g_212…
cluster2925	GO:1990748; P:cellular detoxification; IEA:Ensembl	11	P49368	Ancoracysta_twista|GFYU01001018_1_p1;Hemimastix_kukwesjijk|EP00696_Hemimastix_kukwesjijk_P008502;Meteora_sporadica|NODE_4035_length_1820_cov_48_958499_g3272_i0;Nebulomonas_marisrubri|TRINITY_DN8875_c0_g1_TRINITY_DN8875_c0_g1_i1_g_54053_m_54053;Nibbleromonas_arcticus|TRINITY_DN22577_c0_g1_TRINITY_DN22577_c0_g1_i1_g_9787_m_9787;Nibbleromonas_curacaus|TRINITY_DN688_c0_g1_TRINITY_DN688_c0_g1_i1_g_802…
cluster2926	GO:0006457; P:protein folding; IEA:InterPro	11	P54411	Ancoracysta_twista|GFYU01001033_1_p1;Hemimastix_kukwesjijk|EP00696_Hemimastix_kukwesjijk_P013339;Meteora_sporadica|NODE_4015_length_1825_cov_110_211451_g3256_i0;Nebulomonas_marisrubri|TRINITY_DN6873_c0_g1_TRINITY_DN6873_c0_g1_i1_g_27147_m_27147;Nibbleromonas_arcticus|TRINITY_DN17222_c0_g1_TRINITY_DN17222_c0_g1_i1_g_11955_m_11955;Nibbleromonas_curacaus|TRINITY_DN4377_c0_g1_TRINITY_DN4377_c0_g1_i1_…
cluster2927	GO:0003743; F:translation initiation factor activity; IEA:UniProtKB-KW	11	Q6GVM3	Ancoracysta_twista|GFYU01001041_1_p1;Hemimastix_kukwesjijk|EP00696_Hemimastix_kukwesjijk_P004187;Meteora_sporadica|NODE_11639_length_493_cov_46_555556_g9884_i0;Nebulomonas_marisrubri|TRINITY_DN6239_c0_g1_TRINITY_DN6239_c0_g1_i1_g_76251_m_76251;Nibbleromonas_arcticus|TRINITY_DN2563_c0_g1_TRINITY_DN2563_c0_g1_i1_g_31171_m_31171;Nibbleromonas_curacaus|TRINITY_DN7118_c0_g1_TRINITY_DN7118_c0_g1_i2_g_1…
cluster2930	GO:0009789; P:positive regulation of abscisic acid-activated signaling pathway; IMP:UniProtKB	11	Q8LB88	Ancoracysta_twista|GFYU01001103_1_p1;Hemimastix_kukwesjijk|EP00696_Hemimastix_kukwesjijk_P016039;Meteora_sporadica|NODE_7042_length_1144_cov_8_885503_g5785_i0;Nebulomonas_marisrubri|TRINITY_DN7479_c0_g1_TRINITY_DN7479_c0_g1_i1_g_48331_m_48331;Nibbleromonas_arcticus|TRINITY_DN9217_c0_g1_TRINITY_DN9217_c0_g1_i1_g_21513_m_21513;Nibbleromonas_curacaus|TRINITY_DN19561_c0_g1_TRINITY_DN19561_c0_g1_i1_g_…
cluster2936	GO:0016192; P:vesicle-mediated transport; IBA:GO_Central	11	P62490	Ancoracysta_twista|GFYU01001404_1_p1;Hemimastix_kukwesjijk|EP00696_Hemimastix_kukwesjijk_P002902;Meteora_sporadica|NODE_8522_length_897_cov_184_161483_g7041_i0;Nebulomonas_marisrubri|TRINITY_DN9272_c0_g1_TRINITY_DN9272_c0_g1_i1_g_11041_m_11041;Nibbleromonas_arcticus|TRINITY_DN1659_c0_g1_TRINITY_DN1659_c0_g1_i1_g_28663_m_28663;Nibbleromonas_curacaus|TRINITY_DN7626_c0_g1_TRINITY_DN7626_c0_g1_i1_g_5…
cluster2940	GO:1990748; P:cellular detoxification; IMP:MGI	11	P80317	Ancoracysta_twista|GFYU01001544_1_p1;Hemimastix_kukwesjijk|EP00696_Hemimastix_kukwesjijk_P016019;Meteora_sporadica|NODE_4178_length_1777_cov_37_022145_g3393_i0;Nebulomonas_marisrubri|TRINITY_DN1178_c0_g1_TRINITY_DN1178_c0_g1_i1_g_58154_m_58154;Nibbleromonas_arcticus|TRINITY_DN22997_c0_g1_TRINITY_DN22997_c0_g1_i1_g_15158_m_15158;Nibbleromonas_curacaus|TRINITY_DN2301_c0_g1_TRINITY_DN2301_c0_g1_i1_g…
cluster2941	GO:0003014; P:renal system process; IEA:Ensembl	11	Q5ZKU0	Ancoracysta_twista|GFYU01001572_1_p1;Hemimastix_kukwesjijk|EP00696_Hemimastix_kukwesjijk_P014231;Meteora_sporadica|NODE_11875_length_470_cov_22_718826_g10117_i0;Nebulomonas_marisrubri|TRINITY_DN5654_c0_g1_TRINITY_DN5654_c0_g1_i1_g_84764_m_84764;Nibbleromonas_arcticus|TRINITY_DN18026_c0_g1_TRINITY_DN18026_c0_g1_i1_g_42350_m_42350;Nibbleromonas_curacaus|TRINITY_DN0_c0_g1_TRINITY_DN0_c0_g1_i1_g_4221…
cluster2949	GO:0015031; P:protein transport; IEA:UniProtKB-KW	11	Q8AWF2	Ancoracysta_twista|GFYU01001759_1_p1;Hemimastix_kukwesjijk|EP00696_Hemimastix_kukwesjijk_P006367;Meteora_sporadica|NODE_10226_length_659_cov_154_394649_g8553_i0;Nebulomonas_marisrubri|TRINITY_DN2577_c0_g1_TRINITY_DN2577_c0_g1_i3_g_81009_m_81009;Nibbleromonas_arcticus|TRINITY_DN2427_c0_g1_TRINITY_DN2427_c0_g1_i1_g_13805_m_13805;Nibbleromonas_curacaus|TRINITY_DN43113_c0_g1_TRINITY_DN43113_c0_g1_i1_…
cluster2950	GO:0043161; P:proteasome-mediated ubiquitin-dependent protein catabolic process; IBA:GO_Central	11	O23714	Ancoracysta_twista|GFYU01001867_1_p1;Hemimastix_kukwesjijk|EP00696_Hemimastix_kukwesjijk_P017428;Meteora_sporadica|NODE_9951_length_694_cov_207_442338_g8303_i0;Nebulomonas_marisrubri|TRINITY_DN1236_c0_g1_TRINITY_DN1236_c0_g1_i1_g_58804_m_58804;Nibbleromonas_arcticus|TRINITY_DN977_c0_g1_TRINITY_DN977_c0_g1_i1_g_26827_m_26827;Nibbleromonas_curacaus|TRINITY_DN36465_c0_g1_TRINITY_DN36465_c0_g1_i1_g_6…
cluster2952	GO:0015031; P:protein transport; IEA:UniProtKB-KW	11	Q9LSX7	Ancoracysta_twista|GFYU01001915_1_p1;Hemimastix_kukwesjijk|EP00696_Hemimastix_kukwesjijk_P016313;Meteora_sporadica|NODE_8896_length_835_cov_32_121447_g7361_i0;Nebulomonas_marisrubri|TRINITY_DN3259_c0_g1_TRINITY_DN3259_c0_g1_i2_g_16573_m_16573;Nibbleromonas_arcticus|TRINITY_DN8477_c0_g1_TRINITY_DN8477_c0_g1_i1_g_6547_m_6547;Nibbleromonas_curacaus|TRINITY_DN13531_c0_g2_TRINITY_DN13531_c0_g2_i1_g_63…
cluster2954	GO:0006511; P:ubiquitin-dependent protein catabolic process; IBA:GO_Central	11	Q6P2U9	Ancoracysta_twista|GFYU01002024_1_p1;Hemimastix_kukwesjijk|EP00696_Hemimastix_kukwesjijk_P002865;Meteora_sporadica|NODE_5167_length_1512_cov_167_240524_g4192_i0;Nebulomonas_marisrubri|TRINITY_DN2723_c0_g1_TRINITY_DN2723_c0_g1_i1_g_66941_m_66941;Nibbleromonas_arcticus|TRINITY_DN16158_c0_g1_TRINITY_DN16158_c0_g1_i1_g_9041_m_9041;Nibbleromonas_curacaus|TRINITY_DN5066_c0_g1_TRINITY_DN5066_c0_g1_i1_g_…
cluster2955	GO:0006511; P:ubiquitin-dependent protein catabolic process; IBA:GO_Central	11	Q8GYA6	Ancoracysta_twista|GFYU01002036_1_p1;Hemimastix_kukwesjijk|EP00696_Hemimastix_kukwesjijk_P001966;Meteora_sporadica|NODE_6447_length_1260_cov_37_000000_g5285_i0;Nebulomonas_marisrubri|TRINITY_DN8727_c0_g1_TRINITY_DN8727_c0_g1_i1_g_31451_m_31451;Nibbleromonas_arcticus|TRINITY_DN2517_c0_g1_TRINITY_DN2517_c0_g1_i1_g_31019_m_31019;Nibbleromonas_curacaus|TRINITY_DN10596_c0_g1_TRINITY_DN10596_c0_g1_i1_g…
cluster2956	GO:0006446; P:regulation of translational initiation; IEA:InterPro	11	Q94HF1	Ancoracysta_twista|GFYU01002041_1_p1;Hemimastix_kukwesjijk|EP00696_Hemimastix_kukwesjijk_P013861;Meteora_sporadica|NODE_9296_length_777_cov_8_631285_g7716_i0;Nebulomonas_marisrubri|TRINITY_DN32680_c0_g1_TRINITY_DN32680_c0_g1_i1_g_33665_m_33665;Nibbleromonas_arcticus|TRINITY_DN23_c0_g1_TRINITY_DN23_c0_g1_i1_g_25312_m_25312;Nibbleromonas_curacaus|TRINITY_DN6137_c0_g1_TRINITY_DN6137_c0_g1_i1_g_64703…
cluster2957	GO:0006616; P:SRP-dependent cotranslational protein targeting to membrane, translocation; IBA:GO_Central	11	Q54XK2	Ancoracysta_twista|GFYU01002053_1_p1;Hemimastix_kukwesjijk|EP00696_Hemimastix_kukwesjijk_P007281;Meteora_sporadica|NODE_4949_length_1567_cov_982_643426_g4002_i0;Nebulomonas_marisrubri|TRINITY_DN9188_c0_g1_TRINITY_DN9188_c0_g1_i1_g_33664_m_33664;Nibbleromonas_arcticus|TRINITY_DN1379_c0_g1_TRINITY_DN1379_c0_g1_i1_g_32666_m_32666;Nibbleromonas_curacaus|TRINITY_DN2754_c0_g1_TRINITY_DN2754_c0_g1_i1_g_…
cluster2958	GO:0006556; P:S-adenosylmethionine biosynthetic process; IEA:UniProtKB-UniPathway	11	A8HYU5	Ancoracysta_twista|GFYU01002062_1_p2;Hemimastix_kukwesjijk|EP00696_Hemimastix_kukwesjijk_P012762;Meteora_sporadica|NODE_5831_length_1369_cov_1143_230887_g4756_i0;Nebulomonas_marisrubri|TRINITY_DN12067_c0_g1_TRINITY_DN12067_c0_g1_i2_g_29407_m_29407;Nibbleromonas_arcticus|TRINITY_DN10798_c0_g1_TRINITY_DN10798_c0_g1_i1_g_16432_m_16432;Nibbleromonas_curacaus|TRINITY_DN3693_c0_g1_TRINITY_DN3693_c0_g1_…
cluster2962	GO:0032482; P:Rab protein signal transduction; IBA:GO_Central	11	Q17R06	Ancoracysta_twista|GFYU01002196_1_p1;Hemimastix_kukwesjijk|EP00696_Hemimastix_kukwesjijk_P010275;Meteora_sporadica|NODE_7431_length_1080_cov_71_816487_g6100_i0;Nebulomonas_marisrubri|TRINITY_DN10228_c0_g2_TRINITY_DN10228_c0_g2_i1_g_14143_m_14143;Nibbleromonas_arcticus|TRINITY_DN9182_c0_g1_TRINITY_DN9182_c0_g1_i1_g_20491_m_20491;Nibbleromonas_curacaus|TRINITY_DN7297_c0_g1_TRINITY_DN7297_c0_g1_i1_g…
cluster2964	GO:0000055; P:ribosomal large subunit export from nucleus; ISS:dictyBase	11	Q55BF2	Ancoracysta_twista|GFYU01002234_1_p1;Hemimastix_kukwesjijk|EP00696_Hemimastix_kukwesjijk_P008187;Meteora_sporadica|NODE_4177_length_1777_cov_57_463869_g3392_i0;Nebulomonas_marisrubri|TRINITY_DN12990_c0_g1_TRINITY_DN12990_c0_g1_i1_g_59912_m_59912;Nibbleromonas_arcticus|TRINITY_DN1066_c0_g1_TRINITY_DN1066_c0_g1_i1_g_52320_m_52320;Nibbleromonas_curacaus|TRINITY_DN13565_c0_g1_TRINITY_DN13565_c0_g1_i1…
cluster2967	GO:0006325; P:chromatin organization; IBA:GO_Central	11	Q8H7Y8	Ancoracysta_twista|GFYU01002336_1_p2;Hemimastix_kukwesjijk|EP00696_Hemimastix_kukwesjijk_P017273;Meteora_sporadica|NODE_7991_length_984_cov_346_468039_g864_i1;Nebulomonas_marisrubri|TRINITY_DN9141_c0_g1_TRINITY_DN9141_c0_g1_i2_g_33296_m_33296;Nibbleromonas_arcticus|TRINITY_DN29086_c0_g1_TRINITY_DN29086_c0_g1_i1_g_50404_m_50404;Nibbleromonas_curacaus|TRINITY_DN4889_c0_g1_TRINITY_DN4889_c0_g1_i1_g_…
cluster2970	GO:0043200; P:response to amino acid; ISO:MGI	11	Q99K70	Ancoracysta_twista|GFYU01002428_1_p1;Hemimastix_kukwesjijk|EP00696_Hemimastix_kukwesjijk_P018631;Meteora_sporadica|NODE_3529_length_2007_cov_45_725077_g2853_i0;Nebulomonas_marisrubri|TRINITY_DN2512_c0_g1_TRINITY_DN2512_c0_g1_i1_g_81059_m_81059;Nibbleromonas_arcticus|TRINITY_DN16851_c0_g1_TRINITY_DN16851_c0_g1_i1_g_51519_m_51519;Nibbleromonas_curacaus|TRINITY_DN38064_c0_g1_TRINITY_DN38064_c0_g1_i1…
cluster2971	GO:0006890; P:retrograde vesicle-mediated transport, Golgi to ER; IBA:GO_Central	11	Q66H80	Ancoracysta_twista|GFYU01002429_1_p1;Hemimastix_kukwesjijk|EP00696_Hemimastix_kukwesjijk_P004522;Meteora_sporadica|NODE_4541_length_1672_cov_67_992551_g3678_i0;Nebulomonas_marisrubri|TRINITY_DN5330_c0_g1_TRINITY_DN5330_c0_g1_i1_g_72833_m_72833;Nibbleromonas_arcticus|TRINITY_DN24960_c0_g1_TRINITY_DN24960_c0_g1_i1_g_46612_m_46612;Nibbleromonas_curacaus|TRINITY_DN9196_c0_g1_TRINITY_DN9196_c0_g1_i1_g…
cluster2974	GO:0009416; P:response to light stimulus; IMP:TAIR	11	P43255	Ancoracysta_twista|GFYU01002550_1_p1;Hemimastix_kukwesjijk|EP00696_Hemimastix_kukwesjijk_P018381;Meteora_sporadica|NODE_9165_length_795_cov_60_059946_g7597_i0;Nebulomonas_marisrubri|TRINITY_DN10357_c0_g1_TRINITY_DN10357_c0_g1_i1_g_91913_m_91913;Nibbleromonas_arcticus|TRINITY_DN23645_c0_g1_TRINITY_DN23645_c0_g1_i1_g_19869_m_19869;Nibbleromonas_curacaus|TRINITY_DN10533_c0_g1_TRINITY_DN10533_c0_g1_i…
cluster2975	GO:0006096; P:glycolytic process; ISS:UniProtKB	11	O65581	Ancoracysta_twista|GFYU01002614_1_p1;Hemimastix_kukwesjijk|EP00696_Hemimastix_kukwesjijk_P003017;Meteora_sporadica|NODE_7169_length_1122_cov_638_031103_g5888_i0;Nebulomonas_marisrubri|TRINITY_DN5859_c0_g1_TRINITY_DN5859_c0_g1_i1_g_34483_m_34483;Nibbleromonas_arcticus|TRINITY_DN2334_c0_g1_TRINITY_DN2334_c0_g1_i1_g_34622_m_34622;Nibbleromonas_curacaus|TRINITY_DN13620_c0_g1_TRINITY_DN13620_c0_g1_i1_…
cluster2979	N/A	11	Q17PP1	Ancoracysta_twista|GFYU01002832_1_p1;Hemimastix_kukwesjijk|EP00696_Hemimastix_kukwesjijk_P019147;Meteora_sporadica|NODE_2555_length_2450_cov_32_232315_g2073_i0;Nebulomonas_marisrubri|TRINITY_DN11350_c0_g1_TRINITY_DN11350_c0_g1_i1_g_39259_m_39259;Nibbleromonas_arcticus|TRINITY_DN9906_c0_g1_TRINITY_DN9906_c0_g1_i1_g_51020_m_51020;Nibbleromonas_curacaus|TRINITY_DN3423_c0_g1_TRINITY_DN3423_c0_g1_i2_g…
cluster2980	GO:0032496; P:response to lipopolysaccharide; IMP:MGI	11	B1AXD8	Ancoracysta_twista|GFYU01002858_1_p1;Hemimastix_kukwesjijk|EP00696_Hemimastix_kukwesjijk_P010187;Meteora_sporadica|NODE_8037_length_977_cov_59_015284_g6615_i0;Nebulomonas_marisrubri|TRINITY_DN9737_c0_g1_TRINITY_DN9737_c0_g1_i1_g_91553_m_91553;Nibbleromonas_arcticus|TRINITY_DN2687_c0_g1_TRINITY_DN2687_c0_g1_i1_g_45587_m_45587;Nibbleromonas_curacaus|TRINITY_DN7349_c0_g1_TRINITY_DN7349_c0_g1_i1_g_85…
cluster2990	GO:0000387; P:spliceosomal snRNP assembly; ISS:UniProtKB	11	Q3SZF8	Ancoracysta_twista|GFYU01003090_1_p1;Hemimastix_kukwesjijk|EP00696_Hemimastix_kukwesjijk_P003206;Meteora_sporadica|NODE_11972_length_461_cov_29_597500_g10212_i0;Nebulomonas_marisrubri|TRINITY_DN5200_c0_g1_TRINITY_DN5200_c0_g1_i1_g_73194_m_73194;Nibbleromonas_arcticus|TRINITY_DN9178_c0_g1_TRINITY_DN9178_c0_g1_i1_g_20391_m_20391;Nibbleromonas_curacaus|TRINITY_DN5872_c0_g1_TRINITY_DN5872_c0_g1_i1_g_…
cluster2997	N/A	11	N/A	Ancoracysta_twista|GFYU01003249_1_p2;Hemimastix_kukwesjijk|EP00696_Hemimastix_kukwesjijk_P008292;Meteora_sporadica|NODE_11929_length_466_cov_23_064198_g10169_i0;Nebulomonas_marisrubri|TRINITY_DN5076_c0_g1_TRINITY_DN5076_c0_g1_i1_g_65788_m_65788;Nibbleromonas_arcticus|TRINITY_DN1417_c0_g1_TRINITY_DN1417_c0_g1_i1_g_47638_m_47638;Nibbleromonas_curacaus|TRINITY_DN5944_c0_g1_TRINITY_DN5944_c0_g1_i1_g_…
cluster3000	GO:0006352; P:DNA-templated transcription, initiation; IEA:InterPro	11	P26354	Ancoracysta_twista|GFYU01003334_1_p1;Hemimastix_kukwesjijk|EP00696_Hemimastix_kukwesjijk_P008083;Meteora_sporadica|NODE_9972_length_691_cov_181_346032_g8322_i0;Nebulomonas_marisrubri|TRINITY_DN14005_c1_g1_TRINITY_DN14005_c1_g1_i1_g_3647_m_3647;Nibbleromonas_arcticus|TRINITY_DN3360_c0_g1_TRINITY_DN3360_c0_g1_i1_g_54461_m_54461;Nibbleromonas_curacaus|TRINITY_DN26101_c0_g1_TRINITY_DN26101_c0_g1_i1_g…
cluster3002	GO:0044206; P:UMP salvage; IEA:UniProtKB-UniPathway	11	P18562	Ancoracysta_twista|GFYU01003393_1_p1;Hemimastix_kukwesjijk|EP00696_Hemimastix_kukwesjijk_P008466;Meteora_sporadica|NODE_9741_length_721_cov_51_795455_g8113_i0;Nebulomonas_marisrubri|TRINITY_DN7852_c0_g1_TRINITY_DN7852_c0_g1_i1_g_85262_m_85262;Nibbleromonas_arcticus|TRINITY_DN1447_c0_g2_TRINITY_DN1447_c0_g2_i1_g_47583_m_47583;Nibbleromonas_curacaus|TRINITY_DN8158_c0_g1_TRINITY_DN8158_c0_g1_i1_g_16…
cluster3004	GO:0075525; P:viral translational termination-reinitiation; ISO:MGI	11	O70194	Ancoracysta_twista|GFYU01003409_1_p1;Hemimastix_kukwesjijk|EP00696_Hemimastix_kukwesjijk_P012571;Meteora_sporadica|NODE_4758_length_1616_cov_20_365916_g3855_i0;Nebulomonas_marisrubri|TRINITY_DN10189_c0_g1_TRINITY_DN10189_c0_g1_i1_g_34029_m_34029;Nibbleromonas_arcticus|TRINITY_DN16828_c0_g1_TRINITY_DN16828_c0_g1_i1_g_51610_m_51610;Nibbleromonas_curacaus|TRINITY_DN10761_c0_g1_TRINITY_DN10761_c0_g1_…
cluster3006	N/A	11	Q6GNT9	Ancoracysta_twista|GFYU01003480_1_p1;Hemimastix_kukwesjijk|EP00696_Hemimastix_kukwesjijk_P000847;Meteora_sporadica|NODE_7569_length_1057_cov_27_327309_g6220_i0;Nebulomonas_marisrubri|TRINITY_DN8837_c0_g1_TRINITY_DN8837_c0_g1_i1_g_54285_m_54285;Nibbleromonas_arcticus|TRINITY_DN15964_c0_g1_TRINITY_DN15964_c0_g1_i1_g_7250_m_7250;Nibbleromonas_curacaus|TRINITY_DN8523_c0_g1_TRINITY_DN8523_c0_g1_i1_g_2…
cluster3008	GO:0036176; P:response to neutral pH; IMP:dictyBase	11	Q76NU1	Ancoracysta_twista|GFYU01003535_1_p1;Hemimastix_kukwesjijk|EP00696_Hemimastix_kukwesjijk_P009382;Meteora_sporadica|NODE_4830_length_1597_cov_318_817708_g3914_i0;Nebulomonas_marisrubri|TRINITY_DN5315_c0_g1_TRINITY_DN5315_c0_g1_i3_g_72898_m_72898;Nibbleromonas_arcticus|TRINITY_DN25873_c0_g1_TRINITY_DN25873_c0_g1_i1_g_3364_m_3364;Nibbleromonas_curacaus|TRINITY_DN24207_c0_g1_TRINITY_DN24207_c0_g1_i1_…
cluster3009	GO:0006631; P:fatty acid metabolic process; IEA:UniProtKB-KW	11	Q54RR5	Ancoracysta_twista|GFYU01003607_1_p1;Hemimastix_kukwesjijk|EP00696_Hemimastix_kukwesjijk_P010804;Meteora_sporadica|NODE_3620_length_1973_cov_21_052824_g2930_i0;Nebulomonas_marisrubri|TRINITY_DN8373_c0_g1_TRINITY_DN8373_c0_g1_i1_g_60289_m_60289;Nibbleromonas_arcticus|TRINITY_DN1748_c0_g1_TRINITY_DN1748_c0_g1_i1_g_44460_m_44460;Nibbleromonas_curacaus|TRINITY_DN10412_c0_g1_TRINITY_DN10412_c0_g1_i1_g…
cluster3010	GO:0006614; P:SRP-dependent cotranslational protein targeting to membrane; IEA:InterPro	11	P16254	Ancoracysta_twista|GFYU01003635_1_p3;Hemimastix_kukwesjijk|EP00696_Hemimastix_kukwesjijk_P002129;Meteora_sporadica|NODE_11663_length_490_cov_194_806527_g9907_i0;Nebulomonas_marisrubri|TRINITY_DN32752_c0_g1_TRINITY_DN32752_c0_g1_i1_g_92721_m_92721;Nibbleromonas_arcticus|TRINITY_DN1175_c0_g1_TRINITY_DN1175_c0_g1_i1_g_28132_m_28132;Nibbleromonas_curacaus|TRINITY_DN10656_c0_g1_TRINITY_DN10656_c0_g1_i…
cluster3012	GO:0006334; P:nucleosome assembly; IEA:InterPro	11	Q71V09	Ancoracysta_twista|GFYU01003741_1_p1;Hemimastix_kukwesjijk|EP00696_Hemimastix_kukwesjijk_P005985;Meteora_sporadica|NODE_11797_length_476_cov_37_040964_g10039_i0;Nebulomonas_marisrubri|TRINITY_DN11389_c0_g2_TRINITY_DN11389_c0_g2_i1_g_38874_m_38874;Nibbleromonas_arcticus|TRINITY_DN4535_c0_g1_TRINITY_DN4535_c0_g1_i1_g_40804_m_40804;Nibbleromonas_curacaus|TRINITY_DN13309_c0_g1_TRINITY_DN13309_c0_g1_i…
cluster3032	GO:0051290; P:protein heterotetramerization; ISS:UniProtKB	11	Q9WUA2	Ancoracysta_twista|GFYU01004522_1_p1;Hemimastix_kukwesjijk|EP00696_Hemimastix_kukwesjijk_P016316;Meteora_sporadica|NODE_3727_length_1932_cov_29_792090_g3023_i0;Nebulomonas_marisrubri|TRINITY_DN6056_c0_g1_TRINITY_DN6056_c0_g1_i1_g_78431_m_78431;Nibbleromonas_arcticus|TRINITY_DN3880_c0_g1_TRINITY_DN3880_c0_g1_i1_g_37800_m_37800;Nibbleromonas_curacaus|TRINITY_DN1352_c0_g1_TRINITY_DN1352_c0_g1_i1_g_5…
cluster3038	GO:0048280; P:vesicle fusion with Golgi apparatus; IBA:GO_Central	11	Q94AU2	Ancoracysta_twista|GFYU01004700_1_p1;Hemimastix_kukwesjijk|EP00696_Hemimastix_kukwesjijk_P001068;Meteora_sporadica|NODE_9902_length_701_cov_70_929688_g8258_i0;Nebulomonas_marisrubri|TRINITY_DN2332_c0_g1_TRINITY_DN2332_c0_g1_i1_g_6445_m_6445;Nibbleromonas_arcticus|TRINITY_DN637_c0_g1_TRINITY_DN637_c0_g1_i1_g_50065_m_50065;Nibbleromonas_curacaus|TRINITY_DN7982_c0_g1_TRINITY_DN7982_c0_g1_i1_g_45481_…
cluster3048	GO:0006412; P:translation; IEA:UniProtKB-UniRule	11	B6IR01	Ancoracysta_twista|GFYU01004959_1_p1;Hemimastix_kukwesjijk|EP00696_Hemimastix_kukwesjijk_P006990;Meteora_sporadica|NODE_9846_length_709_cov_25_337963_g8205_i0;Nebulomonas_marisrubri|TRINITY_DN12013_c0_g1_TRINITY_DN12013_c0_g1_i2_g_29236_m_29236;Nibbleromonas_arcticus|TRINITY_DN1574_c0_g1_TRINITY_DN1574_c0_g1_i1_g_49117_m_49117;Nibbleromonas_curacaus|TRINITY_DN17627_c0_g1_TRINITY_DN17627_c0_g1_i2_…
cluster3058	GO:0005975; P:carbohydrate metabolic process; IEA:UniProtKB-KW	11	A2WXB2	Ancoracysta_twista|GFYU01005433_1_p1;Hemimastix_kukwesjijk|EP00696_Hemimastix_kukwesjijk_P011900;Meteora_sporadica|NODE_7040_length_1144_cov_16_317636_g5783_i0;Nebulomonas_marisrubri|TRINITY_DN4273_c0_g1_TRINITY_DN4273_c0_g1_i1_g_6735_m_6735;Nibbleromonas_arcticus|TRINITY_DN993_c0_g1_TRINITY_DN993_c0_g1_i1_g_26815_m_26815;Nibbleromonas_curacaus|TRINITY_DN1268_c0_g1_TRINITY_DN1268_c0_g1_i1_g_75583…
cluster3060	GO:0005737; C:cytoplasm; IEA:UniProtKB-SubCell	11	Q55BD5	Ancoracysta_twista|GFYU01005492_1_p1;Hemimastix_kukwesjijk|EP00696_Hemimastix_kukwesjijk_P000562;Meteora_sporadica|NODE_8421_length_913_cov_102_678404_g6955_i0;Nebulomonas_marisrubri|TRINITY_DN10807_c0_g1_TRINITY_DN10807_c0_g1_i3_g_19409_m_19409;Nibbleromonas_arcticus|TRINITY_DN2703_c0_g1_TRINITY_DN2703_c0_g1_i1_g_48058_m_48058;Nibbleromonas_curacaus|TRINITY_DN10822_c0_g1_TRINITY_DN10822_c0_g1_i1…
cluster3062	GO:0009744; P:response to sucrose; IMP:UniProtKB	11	Q9C5Z2	Ancoracysta_twista|GFYU01005518_1_p1;Hemimastix_kukwesjijk|EP00696_Hemimastix_kukwesjijk_P005833;Meteora_sporadica|NODE_6558_length_1240_cov_21_189143_g5376_i0;Nebulomonas_marisrubri|TRINITY_DN5648_c0_g1_TRINITY_DN5648_c0_g1_i2_g_84848_m_84848;Nibbleromonas_arcticus|TRINITY_DN2805_c0_g1_TRINITY_DN2805_c0_g1_i1_g_8920_m_8920;Nibbleromonas_curacaus|TRINITY_DN10734_c0_g1_TRINITY_DN10734_c0_g1_i1_g_2…
cluster3065	GO:0007179; P:transforming growth factor beta receptor signaling pathway; TAS:ProtInc	11	P49354	Ancoracysta_twista|GFYU01005681_1_p1;Hemimastix_kukwesjijk|EP00696_Hemimastix_kukwesjijk_P003620;Meteora_sporadica|NODE_7822_length_1011_cov_28_658947_g6441_i0;Nebulomonas_marisrubri|TRINITY_DN3054_c0_g1_TRINITY_DN3054_c0_g1_i1_g_68306_m_68306;Nibbleromonas_arcticus|TRINITY_DN6301_c0_g1_TRINITY_DN6301_c0_g1_i1_g_1291_m_1291;Nibbleromonas_curacaus|TRINITY_DN2874_c0_g1_TRINITY_DN2874_c0_g1_i1_g_127…
cluster3068	GO:0006099; P:tricarboxylic acid cycle; IBA:GO_Central	11	O82663	Ancoracysta_twista|GFYU01005834_1_p1;Hemimastix_kukwesjijk|EP00696_Hemimastix_kukwesjijk_P015479;Meteora_sporadica|NODE_3349_length_2073_cov_33_668489_g2708_i0;Nebulomonas_marisrubri|TRINITY_DN11196_c0_g1_TRINITY_DN11196_c0_g1_i1_g_66634_m_66634;Nibbleromonas_arcticus|TRINITY_DN3470_c0_g1_TRINITY_DN3470_c0_g1_i1_g_34241_m_34241;Nibbleromonas_curacaus|TRINITY_DN4478_c0_g1_TRINITY_DN4478_c0_g1_i1_g…
cluster3079	GO:0042098; P:T cell proliferation; IMP:UniProtKB	11	P17812	Ancoracysta_twista|GFYU01006298_1_p1;Hemimastix_kukwesjijk|EP00696_Hemimastix_kukwesjijk_P015230;Meteora_sporadica|NODE_3148_length_2152_cov_13_742707_g2553_i0;Nebulomonas_marisrubri|TRINITY_DN6577_c0_g1_TRINITY_DN6577_c0_g1_i1_g_35446_m_35446;Nibbleromonas_arcticus|TRINITY_DN1598_c0_g1_TRINITY_DN1598_c0_g1_i1_g_48912_m_48912;Nibbleromonas_curacaus|TRINITY_DN12043_c0_g1_TRINITY_DN12043_c0_g1_i2_g…
cluster3091	GO:0006120; P:mitochondrial electron transport, NADH to ubiquinone; IBA:GO_Central	11	Q9FNN5	Ancoracysta_twista|GFYU01006867_1_p1;Hemimastix_kukwesjijk|EP00696_Hemimastix_kukwesjijk_P006701;Meteora_sporadica|NODE_5522_length_1435_cov_45_654294_g4488_i0;Nebulomonas_marisrubri|TRINITY_DN5452_c0_g1_TRINITY_DN5452_c0_g1_i1_g_78001_m_78001;Nibbleromonas_arcticus|TRINITY_DN494_c0_g1_TRINITY_DN494_c0_g1_i1_g_5261_m_5261;Nibbleromonas_curacaus|TRINITY_DN8323_c0_g1_TRINITY_DN8323_c0_g1_i1_g_81218…
cluster3092	GO:0000398; P:mRNA splicing, via spliceosome; IBA:GO_Central	11	Q5BE22	Ancoracysta_twista|GFYU01006869_1_p1;Hemimastix_kukwesjijk|EP00696_Hemimastix_kukwesjijk_P008174;Meteora_sporadica|NODE_4499_length_1682_cov_26_010487_g3648_i0;Nebulomonas_marisrubri|TRINITY_DN12255_c0_g1_TRINITY_DN12255_c0_g1_i2_g_35084_m_35084;Nibbleromonas_arcticus|TRINITY_DN6999_c0_g1_TRINITY_DN6999_c0_g1_i1_g_21785_m_21785;Nibbleromonas_curacaus|TRINITY_DN24270_c0_g1_TRINITY_DN24270_c0_g1_i1…
cluster3093	GO:0003743; F:translation initiation factor activity; IEA:UniProtKB-KW	11	Q54EY2	Ancoracysta_twista|GFYU01006876_1_p1;Hemimastix_kukwesjijk|EP00696_Hemimastix_kukwesjijk_P010271;Meteora_sporadica|NODE_6654_length_1221_cov_22_487931_g5458_i0;Nebulomonas_marisrubri|TRINITY_DN8290_c0_g1_TRINITY_DN8290_c0_g1_i1_g_11680_m_11680;Nibbleromonas_arcticus|TRINITY_DN15449_c0_g1_TRINITY_DN15449_c0_g1_i1_g_53186_m_53186;Nibbleromonas_curacaus|TRINITY_DN1288_c0_g1_TRINITY_DN1288_c0_g1_i1_g…
cluster3094	GO:0010591; P:regulation of lamellipodium assembly; IBA:GO_Central	11	P14315	Ancoracysta_twista|GFYU01006912_1_p1;Hemimastix_kukwesjijk|EP00696_Hemimastix_kukwesjijk_P016845;Meteora_sporadica|NODE_8835_length_845_cov_291_336735_g7306_i0;Nebulomonas_marisrubri|TRINITY_DN3127_c0_g1_TRINITY_DN3127_c0_g1_i1_g_83860_m_83860;Nibbleromonas_arcticus|TRINITY_DN8752_c0_g1_TRINITY_DN8752_c0_g1_i1_g_42112_m_42112;Nibbleromonas_curacaus|TRINITY_DN1238_c0_g1_TRINITY_DN1238_c0_g1_i1_g_7…
cluster3095	GO:2001256; P:regulation of store-operated calcium entry; ISS:UniProtKB	11	F7C1E2	Ancoracysta_twista|GFYU01006916_1_p1;Hemimastix_kukwesjijk|EP00696_Hemimastix_kukwesjijk_P004934;Meteora_sporadica|NODE_7557_length_1059_cov_22_161323_g6211_i0;Nebulomonas_marisrubri|TRINITY_DN9489_c0_g1_TRINITY_DN9489_c0_g1_i1_g_64324_m_64324;Nibbleromonas_arcticus|TRINITY_DN627_c0_g1_TRINITY_DN627_c0_g1_i1_g_50163_m_50163;Nibbleromonas_curacaus|TRINITY_DN29374_c0_g1_TRINITY_DN29374_c0_g1_i1_g_2…
cluster3101	GO:0034314; P:Arp2/3 complex-mediated actin nucleation; IBA:GO_Central	11	Q3T035	Ancoracysta_twista|GFYU01007299_1_p1;Hemimastix_kukwesjijk|EP00696_Hemimastix_kukwesjijk_P013518;Meteora_sporadica|NODE_10728_length_594_cov_248_313321_g9015_i0;Nebulomonas_marisrubri|TRINITY_DN8301_c0_g1_TRINITY_DN8301_c0_g1_i2_g_11766_m_11766;Nibbleromonas_arcticus|TRINITY_DN3183_c0_g1_TRINITY_DN3183_c0_g1_i1_g_6955_m_6955;Nibbleromonas_curacaus|TRINITY_DN3370_c0_g1_TRINITY_DN3370_c0_g1_i1_g_86…
cluster3102	GO:0034975; P:protein folding in endoplasmic reticulum; IBA:GO_Central	11	Q1ZXH4	Ancoracysta_twista|GFYU01007300_1_p1;Hemimastix_kukwesjijk|EP00696_Hemimastix_kukwesjijk_P008548;Meteora_sporadica|NODE_11955_length_463_cov_6_721393_g10195_i0;Nebulomonas_marisrubri|TRINITY_DN1290_c0_g1_TRINITY_DN1290_c0_g1_i1_g_58728_m_58728;Nibbleromonas_arcticus|TRINITY_DN26227_c0_g1_TRINITY_DN26227_c0_g1_i1_g_45976_m_45976;Nibbleromonas_curacaus|TRINITY_DN43208_c0_g1_TRINITY_DN43208_c0_g1_i1…
cluster3105	N/A	11	Q178A5	Ancoracysta_twista|GFYU01007521_1_p1;Hemimastix_kukwesjijk|EP00696_Hemimastix_kukwesjijk_P003703;Meteora_sporadica|NODE_11132_length_551_cov_97_571429_g9397_i0;Nebulomonas_marisrubri|TRINITY_DN168_c0_g1_TRINITY_DN168_c0_g1_i1_g_204_m_204;Nibbleromonas_arcticus|TRINITY_DN1342_c0_g1_TRINITY_DN1342_c0_g1_i1_g_32823_m_32823;Nibbleromonas_curacaus|TRINITY_DN26197_c0_g1_TRINITY_DN26197_c0_g1_i1_g_4870_…
cluster3110	N/A	11	Q5R9S1	Ancoracysta_twista|GFYU01007622_1_p1;Hemimastix_kukwesjijk|EP00696_Hemimastix_kukwesjijk_P008797;Meteora_sporadica|NODE_9816_length_712_cov_20_439324_g8179_i0;Nebulomonas_marisrubri|TRINITY_DN5488_c0_g1_TRINITY_DN5488_c0_g1_i1_g_77890_m_77890;Nibbleromonas_arcticus|TRINITY_DN22713_c0_g1_TRINITY_DN22713_c0_g1_i1_g_11172_m_11172;Nibbleromonas_curacaus|TRINITY_DN11383_c0_g2_TRINITY_DN11383_c0_g2_i1_…
cluster3121	GO:0006890; P:retrograde vesicle-mediated transport, Golgi to ER; TAS:Reactome	11	Q6K044	Ancoracysta_twista|GFYU01008071_1_p1;Hemimastix_kukwesjijk|EP00696_Hemimastix_kukwesjijk_P017316;Meteora_sporadica|NODE_5028_length_1548_cov_20_329523_g4070_i0;Nebulomonas_marisrubri|TRINITY_DN417_c0_g1_TRINITY_DN417_c0_g1_i1_g_79817_m_79817;Nibbleromonas_arcticus|TRINITY_DN18779_c0_g1_TRINITY_DN18779_c0_g1_i1_g_25915_m_25915;Nibbleromonas_curacaus|TRINITY_DN6210_c0_g1_TRINITY_DN6210_c0_g1_i2_g_7…
cluster3123	GO:0000079; P:regulation of cyclin-dependent protein serine/threonine kinase activity; ISS:HGNC	11	Q99ME9	Ancoracysta_twista|GFYU01008124_1_p1;Hemimastix_kukwesjijk|EP00696_Hemimastix_kukwesjijk_P015887;Meteora_sporadica|NODE_3237_length_2118_cov_13_272727_g2623_i0;Nebulomonas_marisrubri|TRINITY_DN12306_c0_g1_TRINITY_DN12306_c0_g1_i1_g_7673_m_7673;Nibbleromonas_arcticus|TRINITY_DN1856_c0_g1_TRINITY_DN1856_c0_g1_i1_g_23262_m_23262;Nibbleromonas_curacaus|TRINITY_DN4489_c0_g1_TRINITY_DN4489_c0_g1_i1_g_1…
cluster3127	GO:0032008; P:positive regulation of TOR signaling; ISS:UniProtKB	11	B4F6Y3	Ancoracysta_twista|GFYU01008360_1_p1;Hemimastix_kukwesjijk|EP00696_Hemimastix_kukwesjijk_P005020;Meteora_sporadica|NODE_11535_length_505_cov_68_619369_g9782_i0;Nebulomonas_marisrubri|TRINITY_DN9008_c0_g1_TRINITY_DN9008_c0_g1_i1_g_43153_m_43153;Nibbleromonas_arcticus|TRINITY_DN2669_c0_g1_TRINITY_DN2669_c0_g1_i1_g_45589_m_45589;Nibbleromonas_curacaus|TRINITY_DN8953_c0_g1_TRINITY_DN8953_c0_g1_i1_g_7…
cluster3135	GO:0006364; P:rRNA processing; IEA:InterPro	11	Q7ZV20	Ancoracysta_twista|GFYU01008895_1_p1;Hemimastix_kukwesjijk|EP00696_Hemimastix_kukwesjijk_P017953;Meteora_sporadica|NODE_9425_length_760_cov_6_161660_g7833_i0;Nebulomonas_marisrubri|TRINITY_DN3884_c0_g1_TRINITY_DN3884_c0_g1_i1_g_4956_m_4956;Nibbleromonas_arcticus|TRINITY_DN23661_c0_g1_TRINITY_DN23661_c0_g1_i1_g_19906_m_19906;Nibbleromonas_curacaus|TRINITY_DN6580_c0_g1_TRINITY_DN6580_c0_g1_i1_g_366…
cluster3136	GO:0006388; P:tRNA splicing, via endonucleolytic cleavage and ligation; ISS:UniProtKB	11	Q63ZS0	Ancoracysta_twista|GFYU01008918_1_p1;Hemimastix_kukwesjijk|EP00696_Hemimastix_kukwesjijk_P011409;Meteora_sporadica|NODE_9080_length_806_cov_42_476510_g7524_i0;Nebulomonas_marisrubri|TRINITY_DN7550_c0_g1_TRINITY_DN7550_c0_g1_i1_g_80273_m_80273;Nibbleromonas_arcticus|TRINITY_DN16474_c0_g1_TRINITY_DN16474_c0_g1_i1_g_3902_m_3902;Nibbleromonas_curacaus|TRINITY_DN1374_c0_g1_TRINITY_DN1374_c0_g1_i1_g_56…
cluster3141	GO:0046686; P:response to cadmium ion; IEP:TAIR	11	Q84XU2	Ancoracysta_twista|GFYU01009329_1_p1;Hemimastix_kukwesjijk|EP00696_Hemimastix_kukwesjijk_P014027;Meteora_sporadica|NODE_5188_length_1508_cov_20_235660_g4209_i0;Nebulomonas_marisrubri|TRINITY_DN10700_c0_g1_TRINITY_DN10700_c0_g1_i1_g_44868_m_44868;Nibbleromonas_arcticus|TRINITY_DN2076_c0_g1_TRINITY_DN2076_c0_g1_i1_g_38728_m_38728;Nibbleromonas_curacaus|TRINITY_DN44410_c0_g1_TRINITY_DN44410_c0_g1_i1…
cluster3146	GO:0000245; P:spliceosomal complex assembly; IMP:UniProtKB	11	Q9BV89	Ancoracysta_twista|GFYU01009515_1_p1;Hemimastix_kukwesjijk|EP00696_Hemimastix_kukwesjijk_P002758;Meteora_sporadica|NODE_5332_length_1477_cov_9_822740_g4330_i0;Nebulomonas_marisrubri|TRINITY_DN8054_c0_g1_TRINITY_DN8054_c0_g1_i1_g_24876_m_24876;Nibbleromonas_arcticus|TRINITY_DN10031_c0_g1_TRINITY_DN10031_c0_g1_i1_g_35174_m_35174;Nibbleromonas_curacaus|TRINITY_DN11560_c0_g1_TRINITY_DN11560_c0_g1_i2_…
cluster3154	GO:0000463; P:maturation of LSU-rRNA from tricistronic rRNA transcript (SSU-rRNA, 58S rRNA, LSU-rRNA); IEA:UniProtKB-UniRule	11	Q0CLJ4	Ancoracysta_twista|GFYU01010043_1_p1;Hemimastix_kukwesjijk|EP00696_Hemimastix_kukwesjijk_P019402;Meteora_sporadica|NODE_7804_length_1014_cov_10_242392_g6425_i0;Nebulomonas_marisrubri|TRINITY_DN4472_c0_g1_TRINITY_DN4472_c0_g1_i1_g_94897_m_94897;Nibbleromonas_arcticus|TRINITY_DN15733_c0_g1_TRINITY_DN15733_c0_g1_i1_g_44984_m_44984;Nibbleromonas_curacaus|TRINITY_DN24689_c0_g1_TRINITY_DN24689_c0_g1_i1…
cluster3160	GO:0042255; P:ribosome assembly; IEA:InterPro	11	A4QND5	Ancoracysta_twista|GFYU01010387_1_p1;Hemimastix_kukwesjijk|EP00696_Hemimastix_kukwesjijk_P010795;Meteora_sporadica|NODE_10204_length_662_cov_3_938436_g8531_i0;Nebulomonas_marisrubri|TRINITY_DN1490_c0_g1_TRINITY_DN1490_c0_g1_i1_g_40162_m_40162;Nibbleromonas_arcticus|TRINITY_DN22759_c0_g1_TRINITY_DN22759_c0_g1_i1_g_11354_m_11354;Nibbleromonas_curacaus|TRINITY_DN3748_c0_g1_TRINITY_DN3748_c0_g1_i1_g_…
cluster3180	GO:0006432; P:phenylalanyl-tRNA aminoacylation; IBA:GO_Central	11	Q9T034	Ancoracysta_twista|GFYU01011760_1_p1;Hemimastix_kukwesjijk|EP00696_Hemimastix_kukwesjijk_P003049;Meteora_sporadica|NODE_4843_length_1595_cov_50_036506_g3921_i0;Nebulomonas_marisrubri|TRINITY_DN6490_c0_g1_TRINITY_DN6490_c0_g1_i1_g_53185_m_53185;Nibbleromonas_arcticus|TRINITY_DN5279_c0_g1_TRINITY_DN5279_c0_g1_i1_g_41510_m_41510;Nibbleromonas_curacaus|TRINITY_DN1919_c0_g1_TRINITY_DN1919_c0_g1_i1_g_6…
cluster3187	GO:0006886; P:intracellular protein transport; IEA:InterPro	11	Q9SV20	Ancoracysta_twista|GFYU01012247_1_p1;Hemimastix_kukwesjijk|EP00696_Hemimastix_kukwesjijk_P001654;Meteora_sporadica|NODE_1757_length_2966_cov_72_777969_g1437_i0;Nebulomonas_marisrubri|TRINITY_DN13942_c3_g2_TRINITY_DN13942_c3_g2_i1_g_69875_m_69875;Nibbleromonas_arcticus|TRINITY_DN15521_c0_g1_TRINITY_DN15521_c0_g1_i1_g_49507_m_49507;Nibbleromonas_curacaus|TRINITY_DN42034_c0_g1_TRINITY_DN42034_c0_g1_…
cluster3190	GO:0004674; F:protein serine/threonine kinase activity; IEA:UniProtKB-KW	11	P51138	Ancoracysta_twista|GFYU01012573_1_p1;Hemimastix_kukwesjijk|EP00696_Hemimastix_kukwesjijk_P008329;Meteora_sporadica|NODE_3302_length_2089_cov_248_903353_g2673_i0;Nebulomonas_marisrubri|TRINITY_DN23436_c0_g1_TRINITY_DN23436_c0_g1_i1_g_83578_m_83578;Nibbleromonas_arcticus|TRINITY_DN11772_c0_g1_TRINITY_DN11772_c0_g1_i1_g_18620_m_18620;Nibbleromonas_curacaus|TRINITY_DN8502_c0_g1_TRINITY_DN8502_c0_g1_i…
cluster3191	GO:0006361; P:transcription initiation from RNA polymerase I promoter; TAS:Reactome	11	Q9GZS1	Ancoracysta_twista|GFYU01012595_1_p1;Hemimastix_kukwesjijk|EP00696_Hemimastix_kukwesjijk_P003865;Meteora_sporadica|NODE_6522_length_1248_cov_15_369840_g5347_i0;Nebulomonas_marisrubri|TRINITY_DN7072_c0_g1_TRINITY_DN7072_c0_g1_i1_g_32883_m_32883;Nibbleromonas_arcticus|TRINITY_DN11096_c0_g1_TRINITY_DN11096_c0_g1_i1_g_29638_m_29638;Nibbleromonas_curacaus|TRINITY_DN7767_c0_g1_TRINITY_DN7767_c0_g1_i1_g…
cluster3200	GO:0006614; P:SRP-dependent cotranslational protein targeting to membrane; IEA:InterPro	11	Q5V5S9	Ancoracysta_twista|GFYU01013267_1_p1;Hemimastix_kukwesjijk|EP00696_Hemimastix_kukwesjijk_P019002;Meteora_sporadica|NODE_12437_length_417_cov_146_353933_g10674_i0;Nebulomonas_marisrubri|TRINITY_DN9185_c0_g1_TRINITY_DN9185_c0_g1_i1_g_33323_m_33323;Nibbleromonas_arcticus|TRINITY_DN1042_c0_g1_TRINITY_DN1042_c0_g1_i1_g_52502_m_52502;Nibbleromonas_curacaus|TRINITY_DN4484_c0_g1_TRINITY_DN4484_c0_g1_i1_g…
cluster3209	GO:0006097; P:glyoxylate cycle; IEA:UniProtKB-KW	11	P49608	Ancoracysta_twista|GFYU01013894_1_p2;Hemimastix_kukwesjijk|EP00696_Hemimastix_kukwesjijk_P019191;Meteora_sporadica|NODE_2038_length_2777_cov_1622_689617_g1661_i0;Nebulomonas_marisrubri|TRINITY_DN10427_c0_g1_TRINITY_DN10427_c0_g1_i1_g_18235_m_18235;Nibbleromonas_arcticus|TRINITY_DN523_c0_g1_TRINITY_DN523_c0_g1_i1_g_16553_m_16553;Nibbleromonas_curacaus|TRINITY_DN7666_c0_g1_TRINITY_DN7666_c0_g1_i3_g…
cluster3216	GO:0060041; P:retina development in camera-type eye; IEA:Ensembl	11	Q8HYI9	Ancoracysta_twista|GFYU01014316_1_p1;Hemimastix_kukwesjijk|EP00696_Hemimastix_kukwesjijk_P002391;Meteora_sporadica|NODE_10386_length_638_cov_46_831889_g8696_i0;Nebulomonas_marisrubri|TRINITY_DN2238_c0_g1_TRINITY_DN2238_c0_g1_i1_g_31984_m_31984;Nibbleromonas_arcticus|TRINITY_DN5439_c0_g1_TRINITY_DN5439_c0_g1_i1_g_46507_m_46507;Nibbleromonas_curacaus|TRINITY_DN507_c0_g1_TRINITY_DN507_c0_g1_i1_g_274…
cluster3219	GO:0001732; P:formation of cytoplasmic translation initiation complex; IEA:UniProtKB-UniRule	11	Q54KZ8	Ancoracysta_twista|GFYU01014435_1_p2;Hemimastix_kukwesjijk|EP00696_Hemimastix_kukwesjijk_P006593;Meteora_sporadica|NODE_5890_length_1361_cov_35_093846_g4806_i0;Nebulomonas_marisrubri|TRINITY_DN11023_c0_g1_TRINITY_DN11023_c0_g1_i2_g_49091_m_49091;Nibbleromonas_arcticus|TRINITY_DN3302_c0_g1_TRINITY_DN3302_c0_g1_i1_g_54395_m_54395;Nibbleromonas_curacaus|TRINITY_DN11245_c0_g1_TRINITY_DN11245_c0_g1_i1…
cluster3229	GO:0006413; P:translational initiation; IBA:GO_Central	11	Q54C49	Ancoracysta_twista|GFYU01014918_1_p2;Hemimastix_kukwesjijk|EP00696_Hemimastix_kukwesjijk_P004781;Meteora_sporadica|NODE_8260_length_938_cov_19_795895_g6811_i0;Nebulomonas_marisrubri|TRINITY_DN10475_c0_g1_TRINITY_DN10475_c0_g1_i1_g_18289_m_18289;Nibbleromonas_arcticus|TRINITY_DN982_c0_g1_TRINITY_DN982_c0_g1_i1_g_26650_m_26650;Nibbleromonas_curacaus|TRINITY_DN9334_c0_g1_TRINITY_DN9334_c0_g1_i1_g_78…
cluster3230	GO:0006470; P:protein dephosphorylation; ISO:MGI	11	Q9D0T2	Ancoracysta_twista|GFYU01014924_1_p1;Hemimastix_kukwesjijk|EP00696_Hemimastix_kukwesjijk_P015017;Meteora_sporadica|NODE_7462_length_1075_cov_23_808679_g6129_i0;Nebulomonas_marisrubri|TRINITY_DN5533_c0_g1_TRINITY_DN5533_c0_g1_i1_g_59202_m_59202;Nibbleromonas_arcticus|TRINITY_DN16654_c0_g1_TRINITY_DN16654_c0_g1_i1_g_41832_m_41832;Nibbleromonas_curacaus|TRINITY_DN36114_c0_g1_TRINITY_DN36114_c0_g1_i1…
cluster3231	GO:0007525; P:somatic muscle development; IBA:GO_Central	11	P00559	Ancoracysta_twista|GFYU01014959_1_p1;Hemimastix_kukwesjijk|EP00696_Hemimastix_kukwesjijk_P004698;Meteora_sporadica|NODE_6161_length_1309_cov_61_438301_g5039_i0;Nebulomonas_marisrubri|TRINITY_DN4296_c0_g1_TRINITY_DN4296_c0_g1_i1_g_6891_m_6891;Nibbleromonas_arcticus|TRINITY_DN19208_c0_g1_TRINITY_DN19208_c0_g1_i1_g_26550_m_26550;Nibbleromonas_curacaus|TRINITY_DN11991_c0_g1_TRINITY_DN11991_c0_g1_i1_g…
cluster3235	GO:0006120; P:mitochondrial electron transport, NADH to ubiquinone; IBA:GO_Central	11	Q54F10	Ancoracysta_twista|GFYU01015499_1_p2;Hemimastix_kukwesjijk|EP00696_Hemimastix_kukwesjijk_P003948;Meteora_sporadica|NODE_8730_length_862_cov_16_058677_g7216_i0;Nebulomonas_marisrubri|TRINITY_DN38286_c0_g1_TRINITY_DN38286_c0_g1_i1_g_17897_m_17897;Nibbleromonas_arcticus|TRINITY_DN695_c0_g1_TRINITY_DN695_c0_g1_i1_g_50144_m_50144;Nibbleromonas_curacaus|TRINITY_DN11263_c0_g1_TRINITY_DN11263_c0_g1_i1_g_…
cluster3236	GO:0016192; P:vesicle-mediated transport; IEA:InterPro	11	Q9SB50	Ancoracysta_twista|GFYU01015655_1_p1;Hemimastix_kukwesjijk|EP00696_Hemimastix_kukwesjijk_P014549;Meteora_sporadica|NODE_4995_length_1557_cov_164_238636_g4041_i0;Nebulomonas_marisrubri|TRINITY_DN4998_c0_g1_TRINITY_DN4998_c0_g1_i1_g_23632_m_23632;Nibbleromonas_arcticus|TRINITY_DN1479_c0_g1_TRINITY_DN1479_c0_g1_i1_g_47632_m_47632;Nibbleromonas_curacaus|TRINITY_DN7650_c0_g1_TRINITY_DN7650_c0_g1_i1_g_…
cluster3243	GO:0019287; P:isopentenyl diphosphate biosynthetic process, mevalonate pathway; IBA:GO_Central	11	Q54YQ9	Ancoracysta_twista|GFYU01016085_1_p1;Hemimastix_kukwesjijk|EP00696_Hemimastix_kukwesjijk_P000269;Meteora_sporadica|NODE_6581_length_1234_cov_34_179881_g5395_i0;Nebulomonas_marisrubri|TRINITY_DN6628_c0_g1_TRINITY_DN6628_c0_g1_i1_g_27828_m_27828;Nibbleromonas_arcticus|TRINITY_DN17391_c0_g1_TRINITY_DN17391_c0_g1_i1_g_29081_m_29081;Nibbleromonas_curacaus|TRINITY_DN17729_c0_g1_TRINITY_DN17729_c0_g1_i1…
cluster3251	GO:0000387; P:spliceosomal snRNP assembly; IBA:GO_Central	11	Q5SNN4	Ancoracysta_twista|GFYU01017271_1_p1;Hemimastix_kukwesjijk|EP00696_Hemimastix_kukwesjijk_P003592;Meteora_sporadica|NODE_7747_length_1024_cov_42_373832_g6375_i0;Nebulomonas_marisrubri|TRINITY_DN9551_c0_g1_TRINITY_DN9551_c0_g1_i2_g_79640_m_79640;Nibbleromonas_arcticus|TRINITY_DN3612_c0_g1_TRINITY_DN3612_c0_g1_i1_g_14199_m_14199;Nibbleromonas_curacaus|TRINITY_DN9229_c0_g1_TRINITY_DN9229_c0_g1_i1_g_3…
cluster3254	GO:0006891; P:intra-Golgi vesicle-mediated transport; IBA:GO_Central	11	Q86K94	Ancoracysta_twista|GFYU01017629_1_p1;Hemimastix_kukwesjijk|EP00696_Hemimastix_kukwesjijk_P012020;Meteora_sporadica|NODE_9268_length_780_cov_122_514604_g7691_i0;Nebulomonas_marisrubri|TRINITY_DN180_c0_g1_TRINITY_DN180_c0_g1_i1_g_134_m_134;Nibbleromonas_arcticus|TRINITY_DN16359_c0_g1_TRINITY_DN16359_c0_g1_i1_g_51311_m_51311;Nibbleromonas_curacaus|TRINITY_DN13358_c0_g1_TRINITY_DN13358_c0_g1_i1_g_243…
cluster3255	GO:0043328; P:protein transport to vacuole involved in ubiquitin-dependent protein catabolic process via the multivesicular body sorting pathway; IBA:GO_Central	11	Q6NWF4	Ancoracysta_twista|GFYU01018004_1_p1;Hemimastix_kukwesjijk|EP00696_Hemimastix_kukwesjijk_P013444;Meteora_sporadica|NODE_10193_length_663_cov_59_352159_g8521_i0;Nebulomonas_marisrubri|TRINITY_DN14088_c1_g2_TRINITY_DN14088_c1_g2_i1_g_2509_m_2509;Nibbleromonas_arcticus|TRINITY_DN18613_c0_g1_TRINITY_DN18613_c0_g1_i1_g_33513_m_33513;Nibbleromonas_curacaus|TRINITY_DN25265_c0_g1_TRINITY_DN25265_c0_g1_i1…
cluster3271	GO:0006096; P:glycolytic process; IEA:UniProtKB-KW	11	Q38799	Ancoracysta_twista|GFYU01021784_1_p1;Hemimastix_kukwesjijk|EP00696_Hemimastix_kukwesjijk_P020118;Meteora_sporadica|NODE_7145_length_1126_cov_34_361502_g5867_i0;Nebulomonas_marisrubri|TRINITY_DN11931_c0_g1_TRINITY_DN11931_c0_g1_i1_g_15710_m_15710;Nibbleromonas_arcticus|TRINITY_DN26232_c0_g1_TRINITY_DN26232_c0_g1_i1_g_45945_m_45945;Nibbleromonas_curacaus|TRINITY_DN1334_c0_g1_TRINITY_DN1334_c0_g1_i1…
cluster3277	GO:0000398; P:mRNA splicing, via spliceosome; IBA:GO_Central	11	Q6AU07	Ancoracysta_twista|GFYU01022525_1_p1;Hemimastix_kukwesjijk|EP00696_Hemimastix_kukwesjijk_P018495;Meteora_sporadica|NODE_4744_length_1621_cov_9_642308_g3842_i0;Nebulomonas_marisrubri|TRINITY_DN13205_c0_g1_TRINITY_DN13205_c0_g1_i1_g_9161_m_9161;Nibbleromonas_arcticus|TRINITY_DN5105_c0_g1_TRINITY_DN5105_c0_g1_i1_g_51150_m_51150;Nibbleromonas_curacaus|TRINITY_DN36543_c0_g1_TRINITY_DN36543_c0_g1_i1_g_…
cluster3278	GO:0030687; C:preribosome, large subunit precursor; IBA:GO_Central	11	Q6P7N1	Ancoracysta_twista|GFYU01022593_1_p1;Hemimastix_kukwesjijk|EP00696_Hemimastix_kukwesjijk_P018466;Meteora_sporadica|NODE_10203_length_662_cov_9_207987_g8530_i0;Nebulomonas_marisrubri|TRINITY_DN4352_c0_g1_TRINITY_DN4352_c0_g1_i1_g_52492_m_52492;Nibbleromonas_arcticus|TRINITY_DN742_c0_g1_TRINITY_DN742_c0_g1_i1_g_30077_m_30077;Nibbleromonas_curacaus|TRINITY_DN10196_c0_g1_TRINITY_DN10196_c0_g1_i1_g_17…
cluster3279	GO:0007034; P:vacuolar transport; IBA:GO_Central	11	P54641	Ancoracysta_twista|GFYU01022920_1_p1;Hemimastix_kukwesjijk|EP00696_Hemimastix_kukwesjijk_P012510;Meteora_sporadica|NODE_7057_length_1142_cov_124_239593_g5795_i0;Nebulomonas_marisrubri|TRINITY_DN6364_c0_g1_TRINITY_DN6364_c0_g1_i1_g_69603_m_69603;Nibbleromonas_arcticus|TRINITY_DN8774_c0_g1_TRINITY_DN8774_c0_g1_i1_g_42162_m_42162;Nibbleromonas_curacaus|TRINITY_DN10036_c0_g1_TRINITY_DN10036_c0_g1_i1_…
cluster3283	GO:0031120; P:snRNA pseudouridine synthesis; IBA:GO_Central	11	Q9LD90	Ancoracysta_twista|GFYU01023388_1_p1;Hemimastix_kukwesjijk|EP00696_Hemimastix_kukwesjijk_P018070;Meteora_sporadica|NODE_5122_length_1523_cov_59_504104_g4158_i0;Nebulomonas_marisrubri|TRINITY_DN13860_c5_g2_TRINITY_DN13860_c5_g2_i1_g_97954_m_97954;Nibbleromonas_arcticus|TRINITY_DN659_c0_g1_TRINITY_DN659_c0_g1_i1_g_50041_m_50041;Nibbleromonas_curacaus|TRINITY_DN5138_c0_g1_TRINITY_DN5138_c0_g1_i2_g_8…
cluster3285	GO:0007062; P:sister chromatid cohesion; IMP:TAIR	11	Q8W1Y0	Ancoracysta_twista|GFYU01023802_1_p1;Hemimastix_kukwesjijk|EP00696_Hemimastix_kukwesjijk_P012904;Meteora_sporadica|NODE_4072_length_1805_cov_21_657110_g3304_i0;Nebulomonas_marisrubri|TRINITY_DN10021_c0_g1_TRINITY_DN10021_c0_g1_i1_g_80475_m_80475;Nibbleromonas_arcticus|TRINITY_DN11290_c0_g1_TRINITY_DN11290_c0_g1_i1_g_1669_m_1669;Nibbleromonas_curacaus|TRINITY_DN43367_c0_g1_TRINITY_DN43367_c0_g1_i1…
cluster3289	GO:0006355; P:regulation of transcription, DNA-templated; ISO:MGI	11	Q9WUQ2	Ancoracysta_twista|GFYU01024256_1_p1;Hemimastix_kukwesjijk|EP00696_Hemimastix_kukwesjijk_P017710;Meteora_sporadica|NODE_7217_length_1113_cov_47_204373_g5925_i0;Nebulomonas_marisrubri|TRINITY_DN5488_c0_g1_TRINITY_DN5488_c0_g1_i1_g_77889_m_77889;Nibbleromonas_arcticus|TRINITY_DN1941_c0_g1_TRINITY_DN1941_c0_g1_i1_g_40473_m_40473;Nibbleromonas_curacaus|TRINITY_DN13574_c0_g1_TRINITY_DN13574_c0_g1_i3_g…
cluster3296	GO:0045048; P:protein insertion into ER membrane; IBA:GO_Central	11	Q54TH4	Ancoracysta_twista|GFYU01025446_1_p1;Hemimastix_kukwesjijk|EP00696_Hemimastix_kukwesjijk_P000207;Meteora_sporadica|NODE_7451_length_1077_cov_35_883858_g6119_i0;Nebulomonas_marisrubri|TRINITY_DN16900_c0_g1_TRINITY_DN16900_c0_g1_i1_g_73602_m_73602;Nibbleromonas_arcticus|TRINITY_DN16550_c0_g1_TRINITY_DN16550_c0_g1_i1_g_47494_m_47494;Nibbleromonas_curacaus|TRINITY_DN4508_c0_g1_TRINITY_DN4508_c0_g1_i1…
cluster3303	GO:0006888; P:ER to Golgi vesicle-mediated transport; IEA:InterPro	11	Q3T0F2	Ancoracysta_twista|GFYU01026849_1_p1;Hemimastix_kukwesjijk|EP00696_Hemimastix_kukwesjijk_P014059;Meteora_sporadica|NODE_11694_length_487_cov_12_143192_g9938_i0;Nebulomonas_marisrubri|TRINITY_DN37320_c0_g1_TRINITY_DN37320_c0_g1_i1_g_38098_m_38098;Nibbleromonas_arcticus|TRINITY_DN8549_c0_g1_TRINITY_DN8549_c0_g1_i1_g_13495_m_13495;Nibbleromonas_curacaus|TRINITY_DN42327_c0_g1_TRINITY_DN42327_c0_g1_i1…
cluster3325	GO:0006364; P:rRNA processing; ISS:UniProtKB	11	Q92979	Ancoracysta_twista|GFYU01032411_1_p2;Hemimastix_kukwesjijk|EP00696_Hemimastix_kukwesjijk_P003991;Meteora_sporadica|NODE_8680_length_871_cov_4_493827_g7172_i0;Nebulomonas_marisrubri|TRINITY_DN13998_c4_g1_TRINITY_DN13998_c4_g1_i1_g_70822_m_70822;Nibbleromonas_arcticus|TRINITY_DN5668_c0_g1_TRINITY_DN5668_c0_g1_i1_g_19533_m_19533;Nibbleromonas_curacaus|TRINITY_DN9192_c0_g1_TRINITY_DN9192_c0_g1_i1_g_3…
cluster3327	GO:0006364; P:rRNA processing; IBA:GO_Central	11	A7S7F2	Ancoracysta_twista|GFYU01032907_1_p2;Hemimastix_kukwesjijk|EP00696_Hemimastix_kukwesjijk_P000021;Meteora_sporadica|NODE_5552_length_1429_cov_17_712719_g4515_i0;Nebulomonas_marisrubri|TRINITY_DN8964_c0_g1_TRINITY_DN8964_c0_g1_i1_g_74110_m_74110;Nibbleromonas_arcticus|TRINITY_DN16691_c0_g1_TRINITY_DN16691_c0_g1_i1_g_41791_m_41791;Nibbleromonas_curacaus|TRINITY_DN7446_c0_g1_TRINITY_DN7446_c0_g1_i1_g…
cluster3330	GO:0008535; P:respiratory chain complex IV assembly; IBA:GO_Central	11	Q9FKT8	Ancoracysta_twista|GFYU01033475_1_p1;Hemimastix_kukwesjijk|EP00696_Hemimastix_kukwesjijk_P014599;Meteora_sporadica|NODE_5421_length_1459_cov_8_684549_g4405_i0;Nebulomonas_marisrubri|TRINITY_DN12172_c0_g1_TRINITY_DN12172_c0_g1_i2_g_16743_m_16743;Nibbleromonas_arcticus|TRINITY_DN1391_c0_g1_TRINITY_DN1391_c0_g1_i1_g_32854_m_32854;Nibbleromonas_curacaus|TRINITY_DN9013_c0_g1_TRINITY_DN9013_c0_g1_i1_g_…
cluster3337	N/A	11	N/A	Ancoracysta_twista|GFYU01035060_1_p1;Hemimastix_kukwesjijk|EP00696_Hemimastix_kukwesjijk_P008406;Meteora_sporadica|NODE_5377_length_1468_cov_7_191898_g4365_i0;Nebulomonas_marisrubri|TRINITY_DN12120_c0_g3_TRINITY_DN12120_c0_g3_i1_g_16902_m_16902;Nibbleromonas_arcticus|TRINITY_DN9395_c0_g1_TRINITY_DN9395_c0_g1_i1_g_49143_m_49143;Nibbleromonas_curacaus|TRINITY_DN18154_c0_g1_TRINITY_DN18154_c0_g1_i1_…
cluster3340	GO:0017148; P:negative regulation of translation; IMP:MGI	11	O60573	Ancoracysta_twista|GFYU01036611_1_p1;Hemimastix_kukwesjijk|EP00696_Hemimastix_kukwesjijk_P014481;Meteora_sporadica|NODE_5521_length_1435_cov_137_061863_g4487_i0;Nebulomonas_marisrubri|TRINITY_DN636_c0_g1_TRINITY_DN636_c0_g1_i1_g_84648_m_84648;Nibbleromonas_arcticus|TRINITY_DN2459_c0_g1_TRINITY_DN2459_c0_g1_i1_g_13641_m_13641;Nibbleromonas_curacaus|TRINITY_DN10171_c0_g1_TRINITY_DN10171_c0_g1_i1_g_…
cluster3354	GO:0018279; P:protein N-linked glycosylation via asparagine; ISS:UniProtKB	11	P27115	Ancoracysta_twista|GFYU01043305_1_p1;Hemimastix_kukwesjijk|EP00696_Hemimastix_kukwesjijk_P010370;Meteora_sporadica|NODE_6946_length_1161_cov_13_020000_g5705_i0;Nebulomonas_marisrubri|TRINITY_DN12392_c0_g1_TRINITY_DN12392_c0_g1_i1_g_7762_m_7762;Nibbleromonas_arcticus|TRINITY_DN516_c0_g1_TRINITY_DN516_c0_g1_i1_g_16575_m_16575;Nibbleromonas_curacaus|TRINITY_DN256_c0_g1_TRINITY_DN256_c0_g1_i1_g_5772_…
cluster3377	GO:0042254; P:ribosome biogenesis; IEA:UniProtKB-KW	11	Q13823	Ancoracysta_twista|GFYU01055070_1_p1;Hemimastix_kukwesjijk|EP00696_Hemimastix_kukwesjijk_P020365;Meteora_sporadica|NODE_5491_length_1443_cov_5_573082_g4461_i0;Nebulomonas_marisrubri|TRINITY_DN12059_c0_g1_TRINITY_DN12059_c0_g1_i1_g_29423_m_29423;Nibbleromonas_arcticus|TRINITY_DN3712_c0_g1_TRINITY_DN3712_c0_g1_i1_g_42817_m_42817;Nibbleromonas_curacaus|TRINITY_DN14140_c0_g1_TRINITY_DN14140_c0_g1_i2_…

## Sheet: SCC - GO Enrichment
GO Annotation	Name	Number of proteins	p-value
GO:1990748	cellular detoxification	26	9.449841159762934e-26
GO:0006120	mitochondrial electron transport, NADH to ubiquinone	21	6.5860895381535564e-21
GO:2001256	regulation of store-operated calcium entry	11	2.025619857366108e-15
GO:0006616	SRP-dependent cotranslational protein targeting to membrane, translocation	17	3.049262586764541e-13
GO:0006432	phenylalanyl-tRNA aminoacylation	13	2.665305141091335e-12
GO:0006556	S-adenosylmethionine biosynthetic process	10	4.237289222548341e-12
GO:0043161	proteasome-mediated ubiquitin-dependent protein catabolic process	27	7.069837906584655e-12
GO:0042255	ribosome assembly	11	9.903817791935236e-12
GO:0031120	snRNA pseudouridine synthesis	9	2.6820022572827735e-11
GO:0043200	response to amino acid	10	3.1515830854471693e-11
GO:0007525	somatic muscle development	10	3.1515830854471693e-11
GO:0000387	spliceosomal snRNP assembly	23	6.511244822280894e-11
GO:0006415	translational termination	11	1.5326548289498406e-10
GO:0003743	translation initiation factor activity	20	1.956738066751584e-10
GO:0001732	formation of cytoplasmic translation initiation complex	14	2.1459916009451916e-10
GO:0034504	protein localization to nucleus	9	5.465682553782504e-10
GO:0046689	response to mercury ion	8	5.548392169753737e-10
GO:0019287	isopentenyl diphosphate biosynthetic process, mevalonate pathway	8	1.6041726001372585e-09
GO:0006049	UDP-N-acetylglucosamine catabolic process	7	3.4425381830904445e-09
GO:0009789	positive regulation of abscisic acid-activated signaling pathway	7	1.105643239645472e-08
GO:1990592	protein K69-linked ufmylation	7	1.105643239645472e-08
GO:0008535	respiratory chain complex IV assembly	8	1.8666281935908994e-08
GO:0032886	regulation of microtubule-based process	6	1.8919348807345818e-08
GO:0032008	positive regulation of TOR signaling	11	2.175370143840268e-08
GO:0051290	protein heterotetramerization	8	3.597775308614718e-08
GO:0006096	glycolytic process	22	7.487508408491937e-08
GO:0036176	response to neutral pH	5	7.592748718961833e-08
GO:0044206	UMP salvage	11	1.0624671714896147e-07
GO:0006891	intra-Golgi vesicle-mediated transport	11	1.4130805949412484e-07
GO:0009744	response to sucrose	10	1.9577430147029752e-07
GO:0034314	Arp2/3 complex-mediated actin nucleation	11	4.0522027181732464e-07
GO:0042098	T cell proliferation	5	4.387303219056229e-07
GO:0048280	vesicle fusion with Golgi apparatus	10	4.816901593116125e-07
GO:0000055	ribosomal large subunit export from nucleus	11	5.17122863792684e-07
GO:0006325	chromatin organization	12	8.658512108352329e-07
GO:0043328	protein targeting to vacuole involved in ubiquitin-dependent protein catabolic process via the multivesicular body sorting pathway	10	1.768704930633462e-06
GO:0007034	vacuolar transport	11	1.9492802706574576e-06
GO:0006888	ER to Golgi vesicle-mediated transport	11	1.9492802706574576e-06
GO:0006097	glyoxylate cycle	4	2.0413207535641308e-06
GO:0006446	regulation of translational initiation	8	2.1669173199644666e-06
GO:0009414	response to water deprivation	15	3.29912301467173e-06
GO:0006508	proteolysis	2	3.5340499996062047e-06
GO:0006355	regulation of transcription, DNA-templated	2	4.624374437175673e-06
GO:0006413	translational initiation	19	5.037423820897653e-06
GO:0006606	protein import into nucleus	11	8.55059123085023e-06
GO:0005730	nucleolus	9	9.565397197650944e-06
GO:0009651	response to salt stress	22	2.0588589687039812e-05
GO:0005986	sucrose biosynthetic process	5	4.619210475654083e-05
GO:0045048	protein insertion into ER membrane	5	4.619210475654083e-05
GO:0017148	negative regulation of translation	8	4.9550501338895594e-05
GO:0022624	proteasome accessory complex	3	5.452655435694793e-05
GO:0002026	regulation of the force of heart contraction	3	5.452655435694793e-05
GO:0019856	pyrimidine nucleobase biosynthetic process	3	5.452655435694793e-05
GO:0006784	heme a biosynthetic process	3	5.452655435694793e-05
GO:0075525	viral translational termination-reinitiation	5	7.22834900420913e-05
GO:0033572	transferrin transport	6	8.679080961306131e-05
GO:0034975	protein folding in endoplasmic reticulum	9	0.00010267114891851587
GO:0000245	spliceosomal complex assembly	11	0.00011837904464057638
GO:0007062	sister chromatid cohesion	9	0.0001378042279646122
GO:0006469	negative regulation of protein kinase activity	3	0.0002099409344135352
GO:0017157	regulation of exocytosis	4	0.00021277993018340593
GO:0018344	protein geranylgeranylation	4	0.00021277993018340593
GO:0010591	regulation of lamellipodium assembly	5	0.00021906447009580095
GO:0006614	SRP-dependent cotranslational protein targeting to membrane	9	0.00030663023987773693
GO:0000338	protein deneddylation	5	0.0003984436266775772
GO:0033365	protein localization to organelle	3	0.0005051984033700926
GO:0060041	retina development in camera-type eye	8	0.0006268178424779233
GO:0006352	DNA-templated transcription, initiation	5	0.0008448819629679644
GO:0000079	regulation of cyclin-dependent protein serine/threonine kinase activity	7	0.0008661184966852024
GO:0000375	RNA splicing, via transesterification reactions	6	0.0009584819172030546
GO:0030687	preribosome, large subunit precursor	3	0.0009725513758190472
GO:0046034	ATP metabolic process	4	0.0013980973175612712
GO:0080148	negative regulation of response to water deprivation	2	0.0014471347526333978
GO:0071816	tail-anchored membrane protein insertion into ER membrane	3	0.0016382000670384206
GO:0022604	regulation of cell morphogenesis	4	0.002965892311192325
GO:0006457	protein folding	21	0.0030831321941533004
GO:0006631	fatty acid metabolic process	11	0.003319518512180662
GO:0006388	tRNA splicing, via endonucleolytic cleavage and ligation	8	0.0041577657318232954
GO:0003014	renal system process	2	0.004177824594829351
GO:0016055	Wnt signaling pathway	2	0.006129632322167668
GO:0006879	iron ion homeostasis	5	0.007931951333214537
GO:0043278	response to morphine	2	0.0080407377880384
GO:0016192	vesicle-mediated transport	30	0.008744904515423087
GO:0007179	transforming growth factor beta receptor signaling pathway	5	0.009872105534995729
GO:0006511	ubiquitin-dependent protein catabolic process	48	0.012580160921579764
GO:1902600	hydrogen ion transmembrane transport	5	0.013297834987019627
GO:0006099	tricarboxylic acid cycle	18	0.013426774340178152
GO:0006417	regulation of translation	2	0.016375561388079357
GO:0016579	protein deubiquitination	4	0.016783549068329007
GO:0000398	mRNA splicing, via spliceosome	5	0.01694224491660683
GO:0006890	retrograde vesicle-mediated transport, Golgi to ER	15	0.020229132434432615
GO:0005737	cytoplasm	9	0.021178531993779347
GO:0006334	nucleosome assembly	7	0.021184964805952146
GO:0045047	protein targeting to ER	2	0.025077566626224148
GO:0046686	response to cadmium ion	10	0.02541316663126351
GO:0001829	trophectodermal cell differentiation	3	0.028660679210773338
GO:0032482	Rab protein signal transduction	8	0.03272085093117065
GO:0042254	ribosome biogenesis	14	0.033999916263765195

## Sheet: Disparia
Cluster ID	GO Annotation	Number of proteins	Swiss_Prot hit	Protein list
cluster1	GO:0010224; P:response to UV-B; IGI:TAIR	331	Q9FN03	Ancoracysta_twista|GFYU01000691_1_p1;Ancoracysta_twista|GFYU01000692_1_p1;Ancoracysta_twista|GFYU01002345_1_p1;Ancoracysta_twista|GFYU01002793_1_p1;Ancoracysta_twista|GFYU01006365_1_p1;Ancoracysta_twista|GFYU01006672_1_p1;Ancoracysta_twista|GFYU01010168_1_p1;Ancoracysta_twista|GFYU01010193_1_p1;Ancoracysta_twista|GFYU01010246_1_p1;Ancoracysta_twista|GFYU01011530_1_p1;Ancoracysta_twista|GFYU010121…
cluster2	GO:0007018; P:microtubule-based movement; IEA:InterPro	314	Q39565	Ancoracysta_twista|GFYU01002367_1_p1;Ancoracysta_twista|GFYU01003027_1_p1;Ancoracysta_twista|GFYU01003359_1_p1;Ancoracysta_twista|GFYU01004289_1_p1;Ancoracysta_twista|GFYU01004290_1_p1;Ancoracysta_twista|GFYU01005064_1_p1;Ancoracysta_twista|GFYU01006044_1_p1;Ancoracysta_twista|GFYU01006637_1_p1;Ancoracysta_twista|GFYU01007259_1_p1;Ancoracysta_twista|GFYU01008665_1_p1;Ancoracysta_twista|GFYU010091…
cluster3	GO:0007018; P:microtubule-based movement; IBA:GO_Central	263	Q8T135	Ancoracysta_twista|GFYU01000341_1_p1;Ancoracysta_twista|GFYU01001223_1_p1;Ancoracysta_twista|GFYU01001583_1_p1;Ancoracysta_twista|GFYU01001710_1_p1;Ancoracysta_twista|GFYU01001889_1_p1;Ancoracysta_twista|GFYU01004047_1_p1;Ancoracysta_twista|GFYU01004247_1_p1;Ancoracysta_twista|GFYU01006438_1_p1;Ancoracysta_twista|GFYU01007244_1_p1;Ancoracysta_twista|GFYU01007344_1_p1;Ancoracysta_twista|GFYU010098…
cluster4	GO:0016032; P:viral process; IEA:UniProtKB-KW	237	Q8RY65	Ancoracysta_twista|GFYU01001700_1_p1;Ancoracysta_twista|GFYU01001918_1_p1;Ancoracysta_twista|GFYU01002226_1_p1;Ancoracysta_twista|GFYU01002528_1_p1;Ancoracysta_twista|GFYU01003972_1_p1;Ancoracysta_twista|GFYU01004753_1_p1;Ancoracysta_twista|GFYU01006260_1_p1;Ancoracysta_twista|GFYU01006739_1_p1;Ancoracysta_twista|GFYU01009601_1_p1;Ancoracysta_twista|GFYU01009847_1_p1;Ancoracysta_twista|GFYU010108…
cluster6	GO:1902287; P:semaphorin-plexin signaling pathway involved in axon guidance; IBA:GO_Central	173	B0S5N4	Ancoracysta_twista|GFYU01005879_1_p1;Ancoracysta_twista|GFYU01006165_1_p1;Ancoracysta_twista|GFYU01008082_1_p1;Ancoracysta_twista|GFYU01010164_1_p1;Ancoracysta_twista|GFYU01022395_1_p1;Ancoracysta_twista|GFYU01037024_1_p1;Ancoracysta_twista|GFYU01041986_1_p1;Ancoracysta_twista|GFYU01060578_1_p1;Ancoracysta_twista|GFYU01063644_1_p1;Ancoracysta_twista|GFYU01064226_1_p1;Ancoracysta_twista|GFYU010653…
cluster7	GO:0048499; P:synaptic vesicle membrane organization; IMP:UniProtKB	166	Q9VYN8	Ancoracysta_twista|GFYU01001866_1_p1;Ancoracysta_twista|GFYU01002031_1_p1;Ancoracysta_twista|GFYU01002125_1_p1;Ancoracysta_twista|GFYU01003269_1_p2;Ancoracysta_twista|GFYU01004049_1_p1;Ancoracysta_twista|GFYU01006886_1_p1;Ancoracysta_twista|GFYU01007438_1_p1;Ancoracysta_twista|GFYU01007741_1_p1;Ancoracysta_twista|GFYU01007913_1_p1;Ancoracysta_twista|GFYU01014049_1_p1;Ancoracysta_twista|GFYU010141…
cluster8	GO:0035176; P:social behavior; IEA:Ensembl	158	Q9D5Z5	Ancoracysta_twista|GFYU01001720_1_p1;Ancoracysta_twista|GFYU01005586_1_p1;Ancoracysta_twista|GFYU01006552_1_p1;Ancoracysta_twista|GFYU01011679_1_p1;Ancoracysta_twista|GFYU01014004_1_p2;Ancoracysta_twista|GFYU01017782_1_p1;Ancoracysta_twista|GFYU01020382_1_p1;Ancoracysta_twista|GFYU01023391_1_p1;Ancoracysta_twista|GFYU01028037_1_p1;Ancoracysta_twista|GFYU01034618_1_p1;Ancoracysta_twista|GFYU010357…
cluster9	GO:0018345; P:protein palmitoylation; ISO:PomBase	157	Q09701	Ancoracysta_twista|GFYU01001413_1_p1;Ancoracysta_twista|GFYU01002426_1_p1;Ancoracysta_twista|GFYU01003846_1_p1;Ancoracysta_twista|GFYU01005996_1_p1;Ancoracysta_twista|GFYU01009721_1_p1;Ancoracysta_twista|GFYU01012262_1_p1;Ancoracysta_twista|GFYU01017349_1_p1;Ancoracysta_twista|GFYU01021299_1_p1;Ancoracysta_twista|GFYU01024480_1_p1;Ancoracysta_twista|GFYU01026074_1_p1;Ancoracysta_twista|GFYU010434…
cluster10	GO:0055085; P:transmembrane transport; IBA:GO_Central	147	Q8RXN0	Ancoracysta_twista|GFYU01000172_1_p1;Ancoracysta_twista|GFYU01001513_1_p1;Ancoracysta_twista|GFYU01001625_1_p1;Ancoracysta_twista|GFYU01001645_1_p1;Ancoracysta_twista|GFYU01001677_1_p1;Ancoracysta_twista|GFYU01003239_1_p2;Ancoracysta_twista|GFYU01006420_1_p1;Ancoracysta_twista|GFYU01010970_1_p1;Ancoracysta_twista|GFYU01014002_1_p1;Ancoracysta_twista|GFYU01020702_1_p1;Ancoracysta_twista|GFYU010207…
cluster11	GO:0034220; P:ion transmembrane transport; TAS:Reactome	141	C9JHS1	Ancoracysta_twista|GFYU01000804_1_p1;Ancoracysta_twista|GFYU01002074_1_p1;Ancoracysta_twista|GFYU01003941_1_p2;Ancoracysta_twista|GFYU01008103_1_p1;Ancoracysta_twista|GFYU01009715_1_p1;Ancoracysta_twista|GFYU01010348_1_p1;Ancoracysta_twista|GFYU01013128_1_p1;Ancoracysta_twista|GFYU01014760_1_p1;Ancoracysta_twista|GFYU01016919_1_p1;Ancoracysta_twista|GFYU01017009_1_p1;Ancoracysta_twista|GFYU010172…
cluster14	GO:0046328; P:regulation of JNK cascade; IGI:FlyBase	136	Q9GQN5	Ancoracysta_twista|GFYU01002800_1_p1;Ancoracysta_twista|GFYU01010307_1_p1;Ancoracysta_twista|GFYU01013513_1_p1;Ancoracysta_twista|GFYU01014286_1_p2;Ancoracysta_twista|GFYU01025289_1_p1;Ancoracysta_twista|GFYU01039848_1_p1;Ancoracysta_twista|GFYU01046500_1_p1;Ancoracysta_twista|GFYU01053535_1_p1;Ancoracysta_twista|GFYU01056637_1_p1;Ancoracysta_twista|GFYU01064849_1_p1;Ancoracysta_twista|GFYU010686…
cluster15	GO:0070296; P:sarcoplasmic reticulum calcium ion transport; IMP:RGD	134	B0LPN4	Ancoracysta_twista|GFYU01008836_1_p1;Ancoracysta_twista|GFYU01013209_1_p1;Ancoracysta_twista|GFYU01013543_1_p1;Ancoracysta_twista|GFYU01017047_1_p1;Ancoracysta_twista|GFYU01017179_1_p2;Ancoracysta_twista|GFYU01020529_1_p1;Ancoracysta_twista|GFYU01022854_1_p1;Ancoracysta_twista|GFYU01025287_1_p2;Ancoracysta_twista|GFYU01029194_1_p1;Ancoracysta_twista|GFYU01031633_1_p1;Ancoracysta_twista|GFYU010327…
cluster22	GO:0031098; P:stress-activated protein kinase signaling cascade; IBA:GO_Central	118	P51957	Ancoracysta_twista|GFYU01007336_1_p1;Ancoracysta_twista|GFYU01008089_1_p1;Ancoracysta_twista|GFYU01008364_1_p1;Ancoracysta_twista|GFYU01012168_1_p1;Ancoracysta_twista|GFYU01012450_1_p1;Ancoracysta_twista|GFYU01016152_1_p1;Ancoracysta_twista|GFYU01018860_1_p1;Ancoracysta_twista|GFYU01021838_1_p1;Ancoracysta_twista|GFYU01030155_1_p1;Ancoracysta_twista|GFYU01035724_1_p1;Ancoracysta_twista|GFYU010375…
cluster24	GO:0006886; P:intracellular protein transport; IMP:UniProtKB	116	Q10AZ7	Ancoracysta_twista|GFYU01001200_1_p1;Ancoracysta_twista|GFYU01001461_1_p1;Ancoracysta_twista|GFYU01001925_1_p1;Ancoracysta_twista|GFYU01004672_1_p1;Ancoracysta_twista|GFYU01007325_1_p1;Ancoracysta_twista|GFYU01012534_1_p1;Ancoracysta_twista|GFYU01018121_1_p1;Ancoracysta_twista|GFYU01021149_1_p1;Ancoracysta_twista|GFYU01022803_1_p1;Ancoracysta_twista|GFYU01028001_1_p1;Ancoracysta_twista|GFYU010321…
cluster25	GO:0097264; P:self proteolysis; ISS:UniProtKB	115	Q8RVL1	Ancoracysta_twista|GFYU01004394_1_p1;Ancoracysta_twista|GFYU01005010_1_p1;Ancoracysta_twista|GFYU01008408_1_p1;Ancoracysta_twista|GFYU01009792_1_p2;Ancoracysta_twista|GFYU01013922_1_p1;Ancoracysta_twista|GFYU01021115_1_p1;Ancoracysta_twista|GFYU01032843_1_p1;Ancoracysta_twista|GFYU01035540_1_p1;Ancoracysta_twista|GFYU01039217_1_p2;Ancoracysta_twista|GFYU01043448_1_p1;Ancoracysta_twista|GFYU010470…
cluster27	GO:0006457; P:protein folding; IEA:InterPro	110	P73789	Ancoracysta_twista|GFYU01000262_1_p1;Ancoracysta_twista|GFYU01000472_1_p1;Ancoracysta_twista|GFYU01000960_1_p2;Ancoracysta_twista|GFYU01004084_1_p1;Ancoracysta_twista|GFYU01011902_1_p1;Ancoracysta_twista|GFYU01013378_1_p1;Ancoracysta_twista|GFYU01014394_1_p1;Ancoracysta_twista|GFYU01014526_1_p1;Ancoracysta_twista|GFYU01015150_1_p1;Ancoracysta_twista|GFYU01025972_1_p1;Ancoracysta_twista|GFYU010320…
cluster28	GO:0031288; P:sorocarp morphogenesis; IMP:dictyBase	108	Q54DT1	Ancoracysta_twista|GFYU01000572_1_p1;Ancoracysta_twista|GFYU01000784_1_p1;Ancoracysta_twista|GFYU01001463_1_p1;Ancoracysta_twista|GFYU01004190_1_p1;Ancoracysta_twista|GFYU01005695_1_p1;Ancoracysta_twista|GFYU01007075_1_p1;Ancoracysta_twista|GFYU01007875_1_p1;Ancoracysta_twista|GFYU01014722_1_p1;Ancoracysta_twista|GFYU01015780_1_p1;Ancoracysta_twista|GFYU01015996_1_p1;Ancoracysta_twista|GFYU010163…
cluster30	GO:0003774; F:motor activity; IEA:InterPro	104	P47808	Ancoracysta_twista|GFYU01015981_1_p1;Ancoracysta_twista|GFYU01021189_1_p1;Ancoracysta_twista|GFYU01021597_1_p1;Ancoracysta_twista|GFYU01034771_1_p1;Ancoracysta_twista|GFYU01056145_1_p1;Ancoracysta_twista|GFYU01064893_1_p2;Ancoracysta_twista|GFYU01073448_1_p1;Ancoracysta_twista|GFYU01083602_1_p1;Ancoracysta_twista|GFYU01084215_1_p1;Hemimastix_kukwesjijk|EP00696_Hemimastix_kukwesjijk_P016116;Meteor…
cluster32	GO:0009617; P:response to bacterium; IEA:Ensembl	103	Q2WGJ9	Ancoracysta_twista|GFYU01004054_1_p1;Ancoracysta_twista|GFYU01012388_1_p1;Ancoracysta_twista|GFYU01012810_1_p1;Ancoracysta_twista|GFYU01016385_1_p1;Ancoracysta_twista|GFYU01023656_1_p1;Ancoracysta_twista|GFYU01026366_1_p1;Ancoracysta_twista|GFYU01034692_1_p1;Ancoracysta_twista|GFYU01038055_1_p1;Ancoracysta_twista|GFYU01039149_1_p2;Ancoracysta_twista|GFYU01046726_1_p1;Ancoracysta_twista|GFYU010571…
cluster34	GO:0016567; P:protein ubiquitination; IBA:GO_Central	99	Q862F4	Ancoracysta_twista|GFYU01000017_1_p2;Ancoracysta_twista|GFYU01000627_1_p1;Ancoracysta_twista|GFYU01012531_1_p2;Ancoracysta_twista|GFYU01017499_1_p1;Ancoracysta_twista|GFYU01025447_1_p1;Hemimastix_kukwesjijk|EP00696_Hemimastix_kukwesjijk_P003868;Hemimastix_kukwesjijk|EP00696_Hemimastix_kukwesjijk_P003869;Hemimastix_kukwesjijk|EP00696_Hemimastix_kukwesjijk_P010444;Hemimastix_kukwesjijk|EP00696_Hemi…
cluster35	GO:0030435; P:sporulation resulting in formation of a cellular spore; IMP:dictyBase	99	Q23917	Ancoracysta_twista|GFYU01000736_1_p1;Ancoracysta_twista|GFYU01001873_1_p1;Ancoracysta_twista|GFYU01002190_1_p1;Ancoracysta_twista|GFYU01002962_1_p1;Ancoracysta_twista|GFYU01003561_1_p1;Ancoracysta_twista|GFYU01003740_1_p1;Ancoracysta_twista|GFYU01004228_1_p1;Ancoracysta_twista|GFYU01006246_1_p1;Ancoracysta_twista|GFYU01006720_1_p1;Ancoracysta_twista|GFYU01008132_1_p1;Ancoracysta_twista|GFYU010082…
cluster38	GO:0007018; P:microtubule-based movement; IBA:GO_Central	96	B9FAF3	Ancoracysta_twista|GFYU01004105_1_p1;Ancoracysta_twista|GFYU01005491_1_p1;Ancoracysta_twista|GFYU01008386_1_p1;Ancoracysta_twista|GFYU01010925_1_p1;Ancoracysta_twista|GFYU01011562_1_p1;Ancoracysta_twista|GFYU01019044_1_p1;Ancoracysta_twista|GFYU01021067_1_p1;Ancoracysta_twista|GFYU01023610_1_p1;Ancoracysta_twista|GFYU01047200_1_p1;Ancoracysta_twista|GFYU01056845_1_p1;Hemimastix_kukwesjijk|EP00696…
cluster39	GO:0018095; P:protein polyglutamylation; TAS:Reactome	96	Q8NHH1	Ancoracysta_twista|GFYU01004689_1_p1;Ancoracysta_twista|GFYU01023492_1_p1;Ancoracysta_twista|GFYU01025769_1_p1;Ancoracysta_twista|GFYU01026833_1_p1;Ancoracysta_twista|GFYU01028621_1_p1;Ancoracysta_twista|GFYU01028999_1_p1;Ancoracysta_twista|GFYU01029942_1_p1;Ancoracysta_twista|GFYU01030377_1_p1;Ancoracysta_twista|GFYU01037314_1_p1;Ancoracysta_twista|GFYU01044543_1_p1;Ancoracysta_twista|GFYU010481…
cluster41	GO:0007175; P:negative regulation of epidermal growth factor-activated receptor activity; ISS:UniProtKB	95	Q6ZPK7	Ancoracysta_twista|GFYU01000721_1_p1;Ancoracysta_twista|GFYU01001985_1_p1;Ancoracysta_twista|GFYU01002227_1_p1;Ancoracysta_twista|GFYU01004107_1_p1;Ancoracysta_twista|GFYU01006836_1_p1;Ancoracysta_twista|GFYU01009402_1_p1;Ancoracysta_twista|GFYU01009778_1_p1;Ancoracysta_twista|GFYU01015853_1_p1;Ancoracysta_twista|GFYU01017729_1_p1;Ancoracysta_twista|GFYU01018294_1_p1;Ancoracysta_twista|GFYU010212…
cluster42	GO:0006892; P:post-Golgi vesicle-mediated transport; ISO:PomBase	95	O94296	Ancoracysta_twista|GFYU01003787_1_p1;Ancoracysta_twista|GFYU01003912_1_p1;Ancoracysta_twista|GFYU01005137_1_p1;Ancoracysta_twista|GFYU01005686_1_p1;Ancoracysta_twista|GFYU01008591_1_p1;Ancoracysta_twista|GFYU01009108_1_p1;Ancoracysta_twista|GFYU01012788_1_p1;Ancoracysta_twista|GFYU01013984_1_p1;Ancoracysta_twista|GFYU01015718_1_p1;Ancoracysta_twista|GFYU01017464_1_p1;Ancoracysta_twista|GFYU010265…
cluster46	GO:0030587; P:sorocarp development; IMP:dictyBase	91	Q556Y8	Ancoracysta_twista|GFYU01000509_1_p1;Ancoracysta_twista|GFYU01001760_1_p1;Ancoracysta_twista|GFYU01003082_1_p1;Ancoracysta_twista|GFYU01003634_1_p1;Ancoracysta_twista|GFYU01003934_1_p1;Ancoracysta_twista|GFYU01005423_1_p1;Ancoracysta_twista|GFYU01005749_1_p1;Ancoracysta_twista|GFYU01009077_1_p1;Ancoracysta_twista|GFYU01012584_1_p1;Ancoracysta_twista|GFYU01016758_1_p1;Ancoracysta_twista|GFYU010311…
cluster47	GO:1902883; P:negative regulation of response to oxidative stress; ISO:MGI	90	E9PV86	Ancoracysta_twista|GFYU01004166_1_p1;Ancoracysta_twista|GFYU01004191_1_p1;Ancoracysta_twista|GFYU01004735_1_p1;Ancoracysta_twista|GFYU01004766_1_p1;Ancoracysta_twista|GFYU01005049_1_p1;Ancoracysta_twista|GFYU01005159_1_p1;Ancoracysta_twista|GFYU01008486_1_p1;Ancoracysta_twista|GFYU01010440_1_p1;Ancoracysta_twista|GFYU01011286_1_p1;Ancoracysta_twista|GFYU01012188_1_p1;Ancoracysta_twista|GFYU010138…
cluster49	GO:0003755; F:peptidyl-prolyl cis-trans isomerase activity; IEA:UniProtKB-KW	89	Q4PIN7	Ancoracysta_twista|GFYU01001979_1_p1;Ancoracysta_twista|GFYU01002477_1_p1;Ancoracysta_twista|GFYU01004016_1_p1;Ancoracysta_twista|GFYU01004110_1_p2;Ancoracysta_twista|GFYU01004938_1_p2;Ancoracysta_twista|GFYU01006335_1_p1;Ancoracysta_twista|GFYU01021925_1_p2;Ancoracysta_twista|GFYU01084998_1_p1;Hemimastix_kukwesjijk|EP00696_Hemimastix_kukwesjijk_P006362;Hemimastix_kukwesjijk|EP00696_Hemimastix_ku…
cluster51	GO:0004842; F:ubiquitin-protein transferase activity; IDA:TAIR	88	Q9LYW5	Ancoracysta_twista|GFYU01001485_1_p1;Ancoracysta_twista|GFYU01001515_1_p1;Ancoracysta_twista|GFYU01002388_1_p1;Ancoracysta_twista|GFYU01003420_1_p1;Ancoracysta_twista|GFYU01003664_1_p1;Ancoracysta_twista|GFYU01003686_1_p1;Ancoracysta_twista|GFYU01003817_1_p1;Ancoracysta_twista|GFYU01003920_1_p1;Ancoracysta_twista|GFYU01005635_1_p1;Ancoracysta_twista|GFYU01006083_1_p1;Ancoracysta_twista|GFYU010070…
cluster52	GO:0006493; P:protein O-linked glycosylation; IDA:TAIR	87	Q9M8Y0	Ancoracysta_twista|GFYU01011660_1_p2;Ancoracysta_twista|GFYU01015872_1_p1;Ancoracysta_twista|GFYU01016946_1_p1;Ancoracysta_twista|GFYU01018373_1_p1;Ancoracysta_twista|GFYU01025531_1_p2;Ancoracysta_twista|GFYU01035797_1_p1;Ancoracysta_twista|GFYU01052026_1_p1;Ancoracysta_twista|GFYU01057379_1_p1;Ancoracysta_twista|GFYU01060571_1_p1;Ancoracysta_twista|GFYU01078973_1_p1;Hemimastix_kukwesjijk|EP00696…
cluster53	GO:0015804; P:neutral amino acid transport; IDA:UniProtKB	86	Q9FKY3	Ancoracysta_twista|GFYU01003050_1_p1;Ancoracysta_twista|GFYU01003251_1_p1;Ancoracysta_twista|GFYU01003886_1_p1;Ancoracysta_twista|GFYU01004562_1_p1;Ancoracysta_twista|GFYU01006090_1_p1;Ancoracysta_twista|GFYU01006940_1_p1;Ancoracysta_twista|GFYU01008758_1_p1;Ancoracysta_twista|GFYU01008855_1_p1;Ancoracysta_twista|GFYU01013869_1_p2;Ancoracysta_twista|GFYU01014996_1_p1;Ancoracysta_twista|GFYU010168…
cluster56	GO:0048235; P:pollen sperm cell differentiation; IEP:TAIR	84	F4K4R6	Ancoracysta_twista|GFYU01007863_1_p1;Ancoracysta_twista|GFYU01047623_1_p1;Ancoracysta_twista|GFYU01073164_1_p1;Hemimastix_kukwesjijk|EP00696_Hemimastix_kukwesjijk_P000896;Hemimastix_kukwesjijk|EP00696_Hemimastix_kukwesjijk_P004658;Hemimastix_kukwesjijk|EP00696_Hemimastix_kukwesjijk_P013446;Hemimastix_kukwesjijk|EP00696_Hemimastix_kukwesjijk_P017573;Hemimastix_kukwesjijk|EP00696_Hemimastix_kukwesj…
cluster57	GO:0000390; P:spliceosomal complex disassembly; IBA:GO_Central	84	Q38953	Ancoracysta_twista|GFYU01009940_1_p1;Ancoracysta_twista|GFYU01019522_1_p1;Ancoracysta_twista|GFYU01021679_1_p1;Ancoracysta_twista|GFYU01023907_1_p2;Ancoracysta_twista|GFYU01057057_1_p1;Ancoracysta_twista|GFYU01061044_1_p1;Ancoracysta_twista|GFYU01061093_1_p1;Ancoracysta_twista|GFYU01070864_1_p1;Ancoracysta_twista|GFYU01079620_1_p1;Hemimastix_kukwesjijk|EP00696_Hemimastix_kukwesjijk_P019587;Hemima…
cluster58	GO:0016567; P:protein ubiquitination; IBA:GO_Central	83	Q8LPN7	Ancoracysta_twista|GFYU01001380_1_p1;Ancoracysta_twista|GFYU01002113_1_p1;Ancoracysta_twista|GFYU01002978_1_p1;Ancoracysta_twista|GFYU01003405_1_p1;Ancoracysta_twista|GFYU01005236_1_p1;Ancoracysta_twista|GFYU01005309_1_p1;Ancoracysta_twista|GFYU01007284_1_p1;Ancoracysta_twista|GFYU01008114_1_p1;Ancoracysta_twista|GFYU01015256_1_p1;Ancoracysta_twista|GFYU01017095_1_p1;Ancoracysta_twista|GFYU010182…
cluster63	GO:0036503; P:ubiquitin-dependent ERAD pathway; IBA:GO_Central	77	P29844	Ancoracysta_twista|GFYU01000607_1_p1;Ancoracysta_twista|GFYU01000959_1_p1;Ancoracysta_twista|GFYU01002071_1_p1;Ancoracysta_twista|GFYU01004399_1_p1;Ancoracysta_twista|GFYU01005062_1_p1;Hemimastix_kukwesjijk|EP00696_Hemimastix_kukwesjijk_P009680;Hemimastix_kukwesjijk|EP00696_Hemimastix_kukwesjijk_P009681;Hemimastix_kukwesjijk|EP00696_Hemimastix_kukwesjijk_P009682;Hemimastix_kukwesjijk|EP00696_Hemi…
cluster64	GO:0006301; P:postreplication repair; ISO:PomBase	77	P36607	Ancoracysta_twista|GFYU01001143_1_p1;Ancoracysta_twista|GFYU01003246_1_p1;Ancoracysta_twista|GFYU01006815_1_p1;Ancoracysta_twista|GFYU01008223_1_p1;Ancoracysta_twista|GFYU01009720_1_p1;Ancoracysta_twista|GFYU01010759_1_p1;Ancoracysta_twista|GFYU01013964_1_p1;Ancoracysta_twista|GFYU01022749_1_p1;Ancoracysta_twista|GFYU01024336_1_p1;Ancoracysta_twista|GFYU01025879_1_p1;Ancoracysta_twista|GFYU010260…
cluster65	GO:0051260; P:protein homooligomerization; IEA:InterPro	74	A4IFB4	Ancoracysta_twista|GFYU01004145_1_p1;Ancoracysta_twista|GFYU01056193_1_p1;Hemimastix_kukwesjijk|EP00696_Hemimastix_kukwesjijk_P001069;Hemimastix_kukwesjijk|EP00696_Hemimastix_kukwesjijk_P001896;Hemimastix_kukwesjijk|EP00696_Hemimastix_kukwesjijk_P006443;Hemimastix_kukwesjijk|EP00696_Hemimastix_kukwesjijk_P006444;Hemimastix_kukwesjijk|EP00696_Hemimastix_kukwesjijk_P006907;Hemimastix_kukwesjijk|EP0…
cluster69	GO:0006013; P:mannose metabolic process; IEA:InterPro	70	Q60HE9	Ancoracysta_twista|GFYU01005038_1_p1;Ancoracysta_twista|GFYU01008868_1_p2;Ancoracysta_twista|GFYU01013007_1_p1;Ancoracysta_twista|GFYU01018098_1_p1;Ancoracysta_twista|GFYU01024805_1_p1;Ancoracysta_twista|GFYU01033318_1_p1;Ancoracysta_twista|GFYU01040847_1_p1;Ancoracysta_twista|GFYU01044536_1_p1;Ancoracysta_twista|GFYU01045887_1_p3;Ancoracysta_twista|GFYU01076642_1_p1;Ancoracysta_twista|GFYU010801…
cluster72	GO:0006853; P:carnitine shuttle; TAS:Reactome	66	O43772	Ancoracysta_twista|GFYU01000653_1_p1;Ancoracysta_twista|GFYU01003349_1_p1;Ancoracysta_twista|GFYU01005921_1_p1;Ancoracysta_twista|GFYU01006372_1_p1;Ancoracysta_twista|GFYU01006568_1_p1;Ancoracysta_twista|GFYU01007625_1_p1;Ancoracysta_twista|GFYU01009063_1_p1;Ancoracysta_twista|GFYU01012426_1_p1;Hemimastix_kukwesjijk|EP00696_Hemimastix_kukwesjijk_P002645;Hemimastix_kukwesjijk|EP00696_Hemimastix_ku…
cluster73	GO:0004316; F:3-oxoacyl-[acyl-carrier-protein] reductase (NADPH) activity; IEA:UniProtKB-EC	66	Q9RPT1	Ancoracysta_twista|GFYU01002991_1_p1;Ancoracysta_twista|GFYU01007061_1_p1;Ancoracysta_twista|GFYU01016563_1_p1;Ancoracysta_twista|GFYU01016613_1_p1;Ancoracysta_twista|GFYU01016975_1_p1;Ancoracysta_twista|GFYU01020319_1_p1;Ancoracysta_twista|GFYU01043327_1_p1;Hemimastix_kukwesjijk|EP00696_Hemimastix_kukwesjijk_P000266;Hemimastix_kukwesjijk|EP00696_Hemimastix_kukwesjijk_P000822;Hemimastix_kukwesjij…
cluster74	GO:0016192; P:vesicle-mediated transport; IMP:UniProtKB	66	Q9FL69	Ancoracysta_twista|GFYU01004576_1_p1;Ancoracysta_twista|GFYU01009330_1_p1;Ancoracysta_twista|GFYU01034471_1_p2;Ancoracysta_twista|GFYU01037366_1_p1;Ancoracysta_twista|GFYU01050523_1_p2;Hemimastix_kukwesjijk|EP00696_Hemimastix_kukwesjijk_P000521;Hemimastix_kukwesjijk|EP00696_Hemimastix_kukwesjijk_P000522;Meteora_sporadica|NODE_2997_length_2219_cov_29_303058_g2426_i0;Meteora_sporadica|NODE_3000_len…
cluster75	GO:0008168; F:methyltransferase activity; IEA:UniProtKB-KW	66	A5PK19	Ancoracysta_twista|GFYU01005051_1_p1;Ancoracysta_twista|GFYU01025653_1_p1;Ancoracysta_twista|GFYU01028888_1_p1;Ancoracysta_twista|GFYU01034722_1_p1;Ancoracysta_twista|GFYU01082618_1_p1;Hemimastix_kukwesjijk|EP00696_Hemimastix_kukwesjijk_P003908;Hemimastix_kukwesjijk|EP00696_Hemimastix_kukwesjijk_P004162;Hemimastix_kukwesjijk|EP00696_Hemimastix_kukwesjijk_P004393;Hemimastix_kukwesjijk|EP00696_Hemi…
cluster76	GO:0033353; P:S-adenosylmethionine cycle; ISS:BHF-UCL	65	Q9UBK8	Ancoracysta_twista|GFYU01001933_1_p1;Ancoracysta_twista|GFYU01006308_1_p1;Ancoracysta_twista|GFYU01006427_1_p1;Ancoracysta_twista|GFYU01009910_1_p1;Ancoracysta_twista|GFYU01028103_1_p1;Ancoracysta_twista|GFYU01040663_1_p1;Ancoracysta_twista|GFYU01053426_1_p1;Ancoracysta_twista|GFYU01059762_1_p1;Hemimastix_kukwesjijk|EP00696_Hemimastix_kukwesjijk_P018673;Meteora_sporadica|NODE_3386_length_2061_cov…
cluster77	N/A	65	Q54PP7	Ancoracysta_twista|GFYU01004018_1_p1;Ancoracysta_twista|GFYU01005239_1_p1;Ancoracysta_twista|GFYU01007411_1_p1;Ancoracysta_twista|GFYU01007720_1_p1;Ancoracysta_twista|GFYU01011335_1_p1;Ancoracysta_twista|GFYU01020599_1_p1;Ancoracysta_twista|GFYU01048123_1_p1;Ancoracysta_twista|GFYU01055757_1_p1;Ancoracysta_twista|GFYU01064877_1_p1;Ancoracysta_twista|GFYU01065908_1_p1;Ancoracysta_twista|GFYU010677…
cluster80	GO:0042542; P:response to hydrogen peroxide; IDA:dictyBase	64	P54644	Ancoracysta_twista|GFYU01001065_1_p1;Ancoracysta_twista|GFYU01003394_1_p1;Ancoracysta_twista|GFYU01005103_1_p1;Ancoracysta_twista|GFYU01005917_1_p1;Ancoracysta_twista|GFYU01008105_1_p1;Ancoracysta_twista|GFYU01019148_1_p1;Ancoracysta_twista|GFYU01029140_1_p1;Ancoracysta_twista|GFYU01034782_1_p1;Ancoracysta_twista|GFYU01075086_1_p1;Ancoracysta_twista|GFYU01077969_1_p1;Ancoracysta_twista|GFYU010801…
cluster86	GO:0016192; P:vesicle-mediated transport; IBA:GO_Central	62	Q06396	Ancoracysta_twista|GFYU01000103_1_p2;Ancoracysta_twista|GFYU01001462_1_p2;Ancoracysta_twista|GFYU01002020_1_p1;Ancoracysta_twista|GFYU01002127_1_p1;Ancoracysta_twista|GFYU01005118_1_p1;Ancoracysta_twista|GFYU01036769_1_p1;Hemimastix_kukwesjijk|EP00696_Hemimastix_kukwesjijk_P009609;Hemimastix_kukwesjijk|EP00696_Hemimastix_kukwesjijk_P013651;Hemimastix_kukwesjijk|EP00696_Hemimastix_kukwesjijk_P0183…
cluster90	GO:0009651; P:response to salt stress; IEP:TAIR	61	Q8LKS5	Ancoracysta_twista|GFYU01000276_1_p1;Ancoracysta_twista|GFYU01000829_1_p1;Ancoracysta_twista|GFYU01004558_1_p1;Ancoracysta_twista|GFYU01006531_1_p1;Ancoracysta_twista|GFYU01011239_1_p1;Hemimastix_kukwesjijk|EP00696_Hemimastix_kukwesjijk_P000208;Hemimastix_kukwesjijk|EP00696_Hemimastix_kukwesjijk_P000209;Hemimastix_kukwesjijk|EP00696_Hemimastix_kukwesjijk_P019842;Meteora_sporadica|NODE_605_length_…
cluster91	GO:0003091; P:renal water homeostasis; TAS:Reactome	60	P31321	Ancoracysta_twista|GFYU01001496_1_p1;Ancoracysta_twista|GFYU01005232_1_p1;Ancoracysta_twista|GFYU01006542_1_p1;Ancoracysta_twista|GFYU01006915_1_p1;Ancoracysta_twista|GFYU01008947_1_p1;Ancoracysta_twista|GFYU01054792_1_p1;Ancoracysta_twista|GFYU01057204_1_p1;Ancoracysta_twista|GFYU01064804_1_p1;Ancoracysta_twista|GFYU01068351_1_p2;Ancoracysta_twista|GFYU01082484_1_p2;Hemimastix_kukwesjijk|EP00696…
cluster92	GO:0034765; P:regulation of ion transmembrane transport; IEA:UniProtKB-KW	59	Q6IVV8	Ancoracysta_twista|GFYU01006118_1_p1;Ancoracysta_twista|GFYU01010912_1_p1;Ancoracysta_twista|GFYU01012314_1_p1;Ancoracysta_twista|GFYU01017962_1_p1;Ancoracysta_twista|GFYU01018097_1_p1;Ancoracysta_twista|GFYU01019518_1_p1;Ancoracysta_twista|GFYU01081488_1_p1;Ancoracysta_twista|GFYU01089754_1_p1;Hemimastix_kukwesjijk|EP00696_Hemimastix_kukwesjijk_P000274;Hemimastix_kukwesjijk|EP00696_Hemimastix_ku…
cluster94	GO:0051301; P:cell division; IEA:UniProtKB-KW	58	P13952	Ancoracysta_twista|GFYU01007030_1_p1;Ancoracysta_twista|GFYU01042002_1_p1;Ancoracysta_twista|GFYU01061259_1_p3;Hemimastix_kukwesjijk|EP00696_Hemimastix_kukwesjijk_P008155;Hemimastix_kukwesjijk|EP00696_Hemimastix_kukwesjijk_P010775;Hemimastix_kukwesjijk|EP00696_Hemimastix_kukwesjijk_P010779;Hemimastix_kukwesjijk|EP00696_Hemimastix_kukwesjijk_P010892;Hemimastix_kukwesjijk|EP00696_Hemimastix_kukwesj…
cluster96	GO:0046718; P:viral entry into host cell; IMP:CACAO	57	P10605	Ancoracysta_twista|GFYU01005109_1_p2;Ancoracysta_twista|GFYU01018828_1_p1;Ancoracysta_twista|GFYU01034532_1_p1;Ancoracysta_twista|GFYU01049759_1_p1;Ancoracysta_twista|GFYU01073177_1_p1;Hemimastix_kukwesjijk|EP00696_Hemimastix_kukwesjijk_P005848;Hemimastix_kukwesjijk|EP00696_Hemimastix_kukwesjijk_P010338;Meteora_sporadica|NODE_5709_length_1394_cov_758_000750_g4648_i0;Meteora_sporadica|NODE_7255_le…
cluster98	GO:0006511; P:ubiquitin-dependent protein catabolic process; IBA:GO_Central	56	Q9P3U4	Ancoracysta_twista|GFYU01000022_1_p1;Ancoracysta_twista|GFYU01000719_1_p1;Ancoracysta_twista|GFYU01001520_1_p1;Ancoracysta_twista|GFYU01002926_1_p1;Ancoracysta_twista|GFYU01003744_1_p1;Ancoracysta_twista|GFYU01007982_1_p1;Ancoracysta_twista|GFYU01040774_1_p1;Hemimastix_kukwesjijk|EP00696_Hemimastix_kukwesjijk_P000210;Hemimastix_kukwesjijk|EP00696_Hemimastix_kukwesjijk_P000325;Hemimastix_kukwesjij…
cluster101	GO:0036503; P:ubiquitin-dependent ERAD pathway; IBA:GO_Central	55	P54609	Ancoracysta_twista|GFYU01000014_1_p1;Ancoracysta_twista|GFYU01021042_1_p1;Ancoracysta_twista|GFYU01056581_1_p1;Ancoracysta_twista|GFYU01079481_1_p1;Hemimastix_kukwesjijk|EP00696_Hemimastix_kukwesjijk_P008821;Meteora_sporadica|NODE_10774_length_589_cov_58_768939_g1417_i1;Meteora_sporadica|NODE_1734_length_2983_cov_66_847023_g1417_i0;Meteora_sporadica|NODE_2342_length_2584_cov_153_779231_g1901_i0;M…
cluster102	GO:0006470; P:protein dephosphorylation; IDA:TAIR	55	Q8RXV3	Ancoracysta_twista|GFYU01001176_1_p1;Ancoracysta_twista|GFYU01001702_1_p1;Ancoracysta_twista|GFYU01002065_1_p1;Ancoracysta_twista|GFYU01007388_1_p1;Ancoracysta_twista|GFYU01011359_1_p1;Ancoracysta_twista|GFYU01013218_1_p1;Hemimastix_kukwesjijk|EP00696_Hemimastix_kukwesjijk_P004197;Hemimastix_kukwesjijk|EP00696_Hemimastix_kukwesjijk_P004203;Hemimastix_kukwesjijk|EP00696_Hemimastix_kukwesjijk_P0196…
cluster103	GO:0048443; P:stamen development; IGI:TAIR	55	Q9LJX0	Ancoracysta_twista|GFYU01001804_1_p1;Ancoracysta_twista|GFYU01001876_1_p1;Ancoracysta_twista|GFYU01001882_1_p1;Ancoracysta_twista|GFYU01006010_1_p1;Ancoracysta_twista|GFYU01006214_1_p1;Ancoracysta_twista|GFYU01014733_1_p1;Hemimastix_kukwesjijk|EP00696_Hemimastix_kukwesjijk_P018903;Hemimastix_kukwesjijk|EP00696_Hemimastix_kukwesjijk_P018915;Meteora_sporadica|NODE_4317_length_1734_cov_4_588165_g350…
cluster105	GO:0016021; C:integral component of membrane; IEA:UniProtKB-KW	55	Q19981	Ancoracysta_twista|GFYU01003925_1_p1;Ancoracysta_twista|GFYU01005831_1_p1;Ancoracysta_twista|GFYU01009681_1_p1;Ancoracysta_twista|GFYU01048997_1_p1;Hemimastix_kukwesjijk|EP00696_Hemimastix_kukwesjijk_P003660;Hemimastix_kukwesjijk|EP00696_Hemimastix_kukwesjijk_P004824;Hemimastix_kukwesjijk|EP00696_Hemimastix_kukwesjijk_P011676;Meteora_sporadica|NODE_11101_length_554_cov_540_961460_g9368_i0;Meteora…
cluster106	GO:0008017; F:microtubule binding; IBA:GO_Central	55	Q6ZMW3	Ancoracysta_twista|GFYU01004436_1_p1;Ancoracysta_twista|GFYU01004833_1_p1;Ancoracysta_twista|GFYU01024186_1_p1;Ancoracysta_twista|GFYU01041949_1_p1;Ancoracysta_twista|GFYU01050439_1_p1;Ancoracysta_twista|GFYU01053830_1_p1;Ancoracysta_twista|GFYU01054133_1_p1;Ancoracysta_twista|GFYU01058813_1_p1;Ancoracysta_twista|GFYU01076607_1_p1;Hemimastix_kukwesjijk|EP00696_Hemimastix_kukwesjijk_P014938;Meteor…
cluster107	GO:0000381; P:regulation of alternative mRNA splicing, via spliceosome; IBA:GO_Central	55	Q3T106	Ancoracysta_twista|GFYU01020646_1_p1;Ancoracysta_twista|GFYU01042304_1_p1;Hemimastix_kukwesjijk|EP00696_Hemimastix_kukwesjijk_P003608;Hemimastix_kukwesjijk|EP00696_Hemimastix_kukwesjijk_P003712;Hemimastix_kukwesjijk|EP00696_Hemimastix_kukwesjijk_P004507;Hemimastix_kukwesjijk|EP00696_Hemimastix_kukwesjijk_P004508;Hemimastix_kukwesjijk|EP00696_Hemimastix_kukwesjijk_P004509;Hemimastix_kukwesjijk|EP0…
cluster108	GO:0006366; P:transcription by RNA polymerase II; IEA:InterPro	55	P35084	Ancoracysta_twista|GFYU01023859_1_p1;Ancoracysta_twista|GFYU01024976_1_p1;Ancoracysta_twista|GFYU01043097_1_p1;Ancoracysta_twista|GFYU01052989_1_p1;Ancoracysta_twista|GFYU01053276_1_p1;Ancoracysta_twista|GFYU01060404_1_p1;Ancoracysta_twista|GFYU01085736_1_p1;Ancoracysta_twista|GFYU01086347_1_p1;Hemimastix_kukwesjijk|EP00696_Hemimastix_kukwesjijk_P003216;Meteora_sporadica|NODE_1345_length_3347_cov…
cluster109	GO:0016192; P:vesicle-mediated transport; IMP:UniProtKB	54	Q42510	Ancoracysta_twista|GFYU01002845_1_p1;Ancoracysta_twista|GFYU01009142_1_p1;Ancoracysta_twista|GFYU01010957_1_p1;Ancoracysta_twista|GFYU01016167_1_p1;Ancoracysta_twista|GFYU01027582_1_p1;Ancoracysta_twista|GFYU01033380_1_p1;Ancoracysta_twista|GFYU01034363_1_p1;Ancoracysta_twista|GFYU01037739_1_p1;Ancoracysta_twista|GFYU01041710_1_p1;Ancoracysta_twista|GFYU01044897_1_p1;Ancoracysta_twista|GFYU010474…
cluster110	GO:0007275; P:multicellular organism development; IEA:UniProtKB-KW	54	Q24742	Ancoracysta_twista|GFYU01012266_1_p1;Ancoracysta_twista|GFYU01013760_1_p1;Ancoracysta_twista|GFYU01021035_1_p1;Ancoracysta_twista|GFYU01025322_1_p1;Ancoracysta_twista|GFYU01038608_1_p1;Ancoracysta_twista|GFYU01045754_1_p1;Hemimastix_kukwesjijk|EP00696_Hemimastix_kukwesjijk_P018146;Meteora_sporadica|NODE_3506_length_2018_cov_15_361267_g2831_i0;Meteora_sporadica|NODE_5292_length_1486_cov_7_796491_g…
cluster112	GO:0021537; P:telencephalon development; IMP:UniProtKB	53	B8A4F0	Ancoracysta_twista|GFYU01000785_1_p1;Ancoracysta_twista|GFYU01003099_1_p1;Ancoracysta_twista|GFYU01004665_1_p1;Ancoracysta_twista|GFYU01033609_1_p1;Ancoracysta_twista|GFYU01062590_1_p1;Hemimastix_kukwesjijk|EP00696_Hemimastix_kukwesjijk_P004186;Hemimastix_kukwesjijk|EP00696_Hemimastix_kukwesjijk_P011519;Hemimastix_kukwesjijk|EP00696_Hemimastix_kukwesjijk_P012381;Hemimastix_kukwesjijk|EP00696_Hemi…
cluster113	GO:0007601; P:visual perception; IEA:UniProtKB-KW	53	Q8BYK4	Ancoracysta_twista|GFYU01001616_1_p1;Ancoracysta_twista|GFYU01006226_1_p1;Ancoracysta_twista|GFYU01013919_1_p1;Ancoracysta_twista|GFYU01023268_1_p1;Ancoracysta_twista|GFYU01094741_1_p1;Hemimastix_kukwesjijk|EP00696_Hemimastix_kukwesjijk_P000395;Hemimastix_kukwesjijk|EP00696_Hemimastix_kukwesjijk_P007608;Hemimastix_kukwesjijk|EP00696_Hemimastix_kukwesjijk_P008462;Hemimastix_kukwesjijk|EP00696_Hemi…
cluster115	GO:0050793; P:regulation of developmental process; IMP:dictyBase	53	Q8MXY0	Ancoracysta_twista|GFYU01002037_1_p2;Ancoracysta_twista|GFYU01004131_1_p2;Ancoracysta_twista|GFYU01004198_1_p1;Ancoracysta_twista|GFYU01006141_1_p1;Ancoracysta_twista|GFYU01008912_1_p1;Ancoracysta_twista|GFYU01010598_1_p1;Ancoracysta_twista|GFYU01016203_1_p1;Ancoracysta_twista|GFYU01022944_1_p1;Ancoracysta_twista|GFYU01045929_1_p1;Ancoracysta_twista|GFYU01062986_1_p2;Hemimastix_kukwesjijk|EP00696…
cluster116	GO:0006364; P:rRNA processing; IBA:GO_Central	53	Q5U2P0	Ancoracysta_twista|GFYU01002586_1_p1;Ancoracysta_twista|GFYU01004686_1_p1;Ancoracysta_twista|GFYU01009651_1_p1;Ancoracysta_twista|GFYU01024662_1_p1;Ancoracysta_twista|GFYU01024664_1_p1;Ancoracysta_twista|GFYU01032056_1_p1;Ancoracysta_twista|GFYU01033336_1_p1;Ancoracysta_twista|GFYU01048090_1_p1;Ancoracysta_twista|GFYU01068760_1_p1;Ancoracysta_twista|GFYU01076894_1_p1;Hemimastix_kukwesjijk|EP00696…
cluster117	GO:0007264; P:small GTPase mediated signal transduction; IBA:GO_Central	53	O14559	Ancoracysta_twista|GFYU01003080_1_p1;Ancoracysta_twista|GFYU01003519_1_p1;Ancoracysta_twista|GFYU01003793_1_p1;Ancoracysta_twista|GFYU01009444_1_p1;Ancoracysta_twista|GFYU01019877_1_p1;Ancoracysta_twista|GFYU01022535_1_p1;Ancoracysta_twista|GFYU01033028_1_p1;Ancoracysta_twista|GFYU01045747_1_p2;Ancoracysta_twista|GFYU01079033_1_p1;Hemimastix_kukwesjijk|EP00696_Hemimastix_kukwesjijk_P001777;Meteor…
cluster118	GO:0007165; P:signal transduction; IC:UniProtKB	53	P91443	Ancoracysta_twista|GFYU01003889_1_p1;Ancoracysta_twista|GFYU01013393_1_p1;Ancoracysta_twista|GFYU01014149_1_p1;Ancoracysta_twista|GFYU01015193_1_p1;Ancoracysta_twista|GFYU01018094_1_p1;Ancoracysta_twista|GFYU01031728_1_p1;Ancoracysta_twista|GFYU01041092_1_p1;Ancoracysta_twista|GFYU01046103_1_p1;Ancoracysta_twista|GFYU01054533_1_p1;Ancoracysta_twista|GFYU01065511_1_p1;Hemimastix_kukwesjijk|EP00696…
cluster122	GO:0007165; P:signal transduction; IEA:InterPro	52	Q84VQ3	Ancoracysta_twista|GFYU01000187_1_p1;Ancoracysta_twista|GFYU01008716_1_p1;Ancoracysta_twista|GFYU01008934_1_p1;Ancoracysta_twista|GFYU01023593_1_p1;Hemimastix_kukwesjijk|EP00696_Hemimastix_kukwesjijk_P002299;Hemimastix_kukwesjijk|EP00696_Hemimastix_kukwesjijk_P017591;Meteora_sporadica|NODE_3205_length_2129_cov_32_450677_g2597_i0;Meteora_sporadica|NODE_3411_length_2050_cov_141_946707_g2755_i0;Mete…
cluster123	GO:0005634; C:nucleus; IEA:UniProtKB-SubCell	52	Q4R8N7	Ancoracysta_twista|GFYU01001158_1_p1;Ancoracysta_twista|GFYU01002286_1_p1;Ancoracysta_twista|GFYU01002534_1_p1;Ancoracysta_twista|GFYU01002726_1_p1;Ancoracysta_twista|GFYU01004052_1_p1;Ancoracysta_twista|GFYU01006094_1_p2;Ancoracysta_twista|GFYU01008357_1_p1;Ancoracysta_twista|GFYU01016011_1_p1;Ancoracysta_twista|GFYU01021208_1_p1;Ancoracysta_twista|GFYU01031229_1_p1;Ancoracysta_twista|GFYU010610…
cluster125	GO:0006364; P:rRNA processing; IEA:UniProtKB-KW	52	Q2U070	Ancoracysta_twista|GFYU01011541_1_p1;Ancoracysta_twista|GFYU01024417_1_p1;Ancoracysta_twista|GFYU01029389_1_p1;Ancoracysta_twista|GFYU01048552_1_p1;Ancoracysta_twista|GFYU01051756_1_p1;Ancoracysta_twista|GFYU01054059_1_p1;Hemimastix_kukwesjijk|EP00696_Hemimastix_kukwesjijk_P001082;Hemimastix_kukwesjijk|EP00696_Hemimastix_kukwesjijk_P013480;Meteora_sporadica|NODE_1783_length_2946_cov_43_296014_g14…
cluster127	GO:0098719; P:sodium ion import across plasma membrane; IBA:GO_Central	51	P26431	Ancoracysta_twista|GFYU01001500_1_p1;Ancoracysta_twista|GFYU01019516_1_p1;Ancoracysta_twista|GFYU01056184_1_p2;Hemimastix_kukwesjijk|EP00696_Hemimastix_kukwesjijk_P005065;Hemimastix_kukwesjijk|EP00696_Hemimastix_kukwesjijk_P014120;Meteora_sporadica|NODE_1184_length_3555_cov_11_224671_g966_i0;Meteora_sporadica|NODE_3091_length_2178_cov_19_268777_g2508_i0;Meteora_sporadica|NODE_3924_length_1861_cov…
cluster129	GO:2000696; P:regulation of epithelial cell differentiation involved in kidney development; IDA:UniProtKB	51	P51817	Ancoracysta_twista|GFYU01003762_1_p1;Ancoracysta_twista|GFYU01003958_1_p1;Ancoracysta_twista|GFYU01005975_1_p1;Ancoracysta_twista|GFYU01065775_1_p1;Ancoracysta_twista|GFYU01072876_1_p1;Hemimastix_kukwesjijk|EP00696_Hemimastix_kukwesjijk_P000725;Hemimastix_kukwesjijk|EP00696_Hemimastix_kukwesjijk_P013306;Hemimastix_kukwesjijk|EP00696_Hemimastix_kukwesjijk_P014518;Hemimastix_kukwesjijk|EP00696_Hemi…
cluster131	GO:0042127; P:regulation of cell proliferation; IEA:Ensembl	51	P10895	Ancoracysta_twista|GFYU01010669_1_p1;Ancoracysta_twista|GFYU01010799_1_p1;Ancoracysta_twista|GFYU01022142_1_p1;Ancoracysta_twista|GFYU01058161_1_p1;Ancoracysta_twista|GFYU01062662_1_p1;Ancoracysta_twista|GFYU01086280_1_p1;Hemimastix_kukwesjijk|EP00696_Hemimastix_kukwesjijk_P011396;Hemimastix_kukwesjijk|EP00696_Hemimastix_kukwesjijk_P013188;Meteora_sporadica|NODE_2747_length_2347_cov_395_176728_g2…
cluster132	GO:0007283; P:spermatogenesis; IEA:Ensembl	51	Q86YY7	Ancoracysta_twista|GFYU01012283_1_p1;Ancoracysta_twista|GFYU01014411_1_p1;Hemimastix_kukwesjijk|EP00696_Hemimastix_kukwesjijk_P006625;Hemimastix_kukwesjijk|EP00696_Hemimastix_kukwesjijk_P015639;Hemimastix_kukwesjijk|EP00696_Hemimastix_kukwesjijk_P016219;Hemimastix_kukwesjijk|EP00696_Hemimastix_kukwesjijk_P016220;Hemimastix_kukwesjijk|EP00696_Hemimastix_kukwesjijk_P020144;Meteora_sporadica|NODE_12…
cluster140	GO:0017112; F:Rab guanyl-nucleotide exchange factor activity; IDA:UniProtKB	49	Q6ZUT9	Ancoracysta_twista|GFYU01002968_1_p1;Ancoracysta_twista|GFYU01039347_1_p1;Ancoracysta_twista|GFYU01054482_1_p1;Ancoracysta_twista|GFYU01074446_1_p1;Ancoracysta_twista|GFYU01082036_1_p1;Hemimastix_kukwesjijk|EP00696_Hemimastix_kukwesjijk_P010010;Meteora_sporadica|NODE_1630_length_3066_cov_20_501498_g1293_i1;Meteora_sporadica|NODE_619_length_4666_cov_18_150706_g508_i0;Meteora_sporadica|NODE_674_len…
cluster142	GO:0009450; P:gamma-aminobutyric acid catabolic process; IEA:UniProtKB-UniPathway	49	Q53197	Ancoracysta_twista|GFYU01009879_1_p1;Ancoracysta_twista|GFYU01012315_1_p2;Ancoracysta_twista|GFYU01015526_1_p1;Ancoracysta_twista|GFYU01055767_1_p2;Ancoracysta_twista|GFYU01067488_1_p1;Ancoracysta_twista|GFYU01081880_1_p2;Ancoracysta_twista|GFYU01081944_1_p2;Ancoracysta_twista|GFYU01092004_1_p2;Hemimastix_kukwesjijk|EP00696_Hemimastix_kukwesjijk_P003057;Hemimastix_kukwesjijk|EP00696_Hemimastix_ku…
cluster145	GO:0006508; P:proteolysis; IBA:GO_Central	48	O76856	Ancoracysta_twista|GFYU01000085_1_p1;Ancoracysta_twista|GFYU01009058_1_p1;Ancoracysta_twista|GFYU01010256_1_p1;Ancoracysta_twista|GFYU01011930_1_p1;Ancoracysta_twista|GFYU01012041_1_p1;Ancoracysta_twista|GFYU01013738_1_p1;Ancoracysta_twista|GFYU01027712_1_p1;Ancoracysta_twista|GFYU01038508_1_p1;Ancoracysta_twista|GFYU01072064_1_p1;Ancoracysta_twista|GFYU01072955_1_p1;Ancoracysta_twista|GFYU010778…
cluster147	GO:0042761; P:very long-chain fatty acid biosynthetic process; IBA:GO_Central	48	Q54CJ4	Ancoracysta_twista|GFYU01001431_1_p1;Ancoracysta_twista|GFYU01010217_1_p1;Ancoracysta_twista|GFYU01014368_1_p1;Ancoracysta_twista|GFYU01021277_1_p1;Ancoracysta_twista|GFYU01055500_1_p1;Hemimastix_kukwesjijk|EP00696_Hemimastix_kukwesjijk_P002067;Hemimastix_kukwesjijk|EP00696_Hemimastix_kukwesjijk_P010399;Hemimastix_kukwesjijk|EP00696_Hemimastix_kukwesjijk_P014068;Hemimastix_kukwesjijk|EP00696_Hemi…
cluster149	GO:0000012; P:single strand break repair; IMP:UniProtKB	48	Q42572	Ancoracysta_twista|GFYU01005737_1_p1;Ancoracysta_twista|GFYU01038805_1_p1;Ancoracysta_twista|GFYU01048112_1_p1;Ancoracysta_twista|GFYU01049524_1_p1;Ancoracysta_twista|GFYU01055290_1_p1;Ancoracysta_twista|GFYU01062400_1_p1;Hemimastix_kukwesjijk|EP00696_Hemimastix_kukwesjijk_P017556;Meteora_sporadica|NODE_1708_length_3001_cov_32_168027_g1397_i0;Meteora_sporadica|NODE_1972_length_2820_cov_16_607466_…
cluster153	GO:0061912; P:(obsolete)selective autophagy; ISS:UniProtKB	47	Q24629	Ancoracysta_twista|GFYU01006743_1_p1;Ancoracysta_twista|GFYU01019673_1_p1;Ancoracysta_twista|GFYU01031672_1_p1;Ancoracysta_twista|GFYU01082809_1_p1;Hemimastix_kukwesjijk|EP00696_Hemimastix_kukwesjijk_P004780;Hemimastix_kukwesjijk|EP00696_Hemimastix_kukwesjijk_P006308;Hemimastix_kukwesjijk|EP00696_Hemimastix_kukwesjijk_P009373;Hemimastix_kukwesjijk|EP00696_Hemimastix_kukwesjijk_P014559;Hemimastix_…
cluster156	GO:0016042; P:lipid catabolic process; IEA:UniProtKB-KW	46	O59952	Ancoracysta_twista|GFYU01001551_1_p1;Ancoracysta_twista|GFYU01006300_1_p1;Ancoracysta_twista|GFYU01011490_1_p2;Ancoracysta_twista|GFYU01014947_1_p1;Ancoracysta_twista|GFYU01017445_1_p1;Ancoracysta_twista|GFYU01035395_1_p1;Ancoracysta_twista|GFYU01039856_1_p1;Ancoracysta_twista|GFYU01049870_1_p1;Ancoracysta_twista|GFYU01066509_1_p1;Ancoracysta_twista|GFYU01068616_1_p1;Hemimastix_kukwesjijk|EP00696…
cluster160	GO:0042147; P:retrograde transport, endosome to Golgi; IMP:UniProtKB	46	Q9BTS8	Ancoracysta_twista|GFYU01006530_1_p1;Ancoracysta_twista|GFYU01008147_1_p1;Ancoracysta_twista|GFYU01034860_1_p1;Hemimastix_kukwesjijk|EP00696_Hemimastix_kukwesjijk_P010565;Hemimastix_kukwesjijk|EP00696_Hemimastix_kukwesjijk_P010567;Hemimastix_kukwesjijk|EP00696_Hemimastix_kukwesjijk_P011619;Hemimastix_kukwesjijk|EP00696_Hemimastix_kukwesjijk_P017342;Meteora_sporadica|NODE_162_length_7556_cov_31_65…
cluster168	GO:0015238; F:drug transmembrane transporter activity; IEA:InterPro	45	Q55C66	Ancoracysta_twista|GFYU01004345_1_p1;Ancoracysta_twista|GFYU01033154_1_p1;Hemimastix_kukwesjijk|EP00696_Hemimastix_kukwesjijk_P002088;Hemimastix_kukwesjijk|EP00696_Hemimastix_kukwesjijk_P002089;Hemimastix_kukwesjijk|EP00696_Hemimastix_kukwesjijk_P006947;Hemimastix_kukwesjijk|EP00696_Hemimastix_kukwesjijk_P014459;Meteora_sporadica|NODE_5614_length_1417_cov_44_095133_g4565_i0;Meteora_sporadica|NODE…
cluster169	GO:0030587; P:sorocarp development; HMP:dictyBase	45	Q54PQ4	Ancoracysta_twista|GFYU01005169_1_p1;Ancoracysta_twista|GFYU01009926_1_p1;Ancoracysta_twista|GFYU01015047_1_p1;Ancoracysta_twista|GFYU01019998_1_p1;Ancoracysta_twista|GFYU01020070_1_p1;Ancoracysta_twista|GFYU01022059_1_p1;Ancoracysta_twista|GFYU01027001_1_p1;Ancoracysta_twista|GFYU01029618_1_p1;Ancoracysta_twista|GFYU01044212_1_p1;Ancoracysta_twista|GFYU01050865_1_p1;Ancoracysta_twista|GFYU010562…
cluster171	GO:0006383; P:transcription by RNA polymerase III; IEA:GOC	44	Q9NW08	Ancoracysta_twista|GFYU01008131_1_p1;Ancoracysta_twista|GFYU01011844_1_p1;Ancoracysta_twista|GFYU01017250_1_p1;Ancoracysta_twista|GFYU01023886_1_p1;Ancoracysta_twista|GFYU01032547_1_p1;Ancoracysta_twista|GFYU01033881_1_p1;Ancoracysta_twista|GFYU01041535_1_p1;Ancoracysta_twista|GFYU01049990_1_p1;Ancoracysta_twista|GFYU01077750_1_p1;Hemimastix_kukwesjijk|EP00696_Hemimastix_kukwesjijk_P011119;Hemima…
cluster174	GO:0004722; F:protein serine/threonine phosphatase activity; ISS:TAIR	43	P48528	Ancoracysta_twista|GFYU01003091_1_p1;Ancoracysta_twista|GFYU01003965_1_p1;Ancoracysta_twista|GFYU01006535_1_p1;Ancoracysta_twista|GFYU01012492_1_p1;Hemimastix_kukwesjijk|EP00696_Hemimastix_kukwesjijk_P007111;Hemimastix_kukwesjijk|EP00696_Hemimastix_kukwesjijk_P015043;Hemimastix_kukwesjijk|EP00696_Hemimastix_kukwesjijk_P015314;Hemimastix_kukwesjijk|EP00696_Hemimastix_kukwesjijk_P019889;Meteora_spo…
cluster175	GO:0046872; F:metal ion binding; IEA:UniProtKB-KW	43	Q5A847	Ancoracysta_twista|GFYU01004574_1_p2;Ancoracysta_twista|GFYU01004623_1_p1;Ancoracysta_twista|GFYU01012210_1_p1;Ancoracysta_twista|GFYU01012676_1_p1;Ancoracysta_twista|GFYU01012774_1_p1;Ancoracysta_twista|GFYU01019509_1_p1;Ancoracysta_twista|GFYU01030349_1_p2;Hemimastix_kukwesjijk|EP00696_Hemimastix_kukwesjijk_P000957;Hemimastix_kukwesjijk|EP00696_Hemimastix_kukwesjijk_P016247;Meteora_sporadica|NO…
cluster176	GO:0006886; P:intracellular protein transport; IBA:GO_Central	43	Q6ZT07	Ancoracysta_twista|GFYU01007305_1_p1;Ancoracysta_twista|GFYU01012714_1_p1;Ancoracysta_twista|GFYU01029582_1_p1;Ancoracysta_twista|GFYU01030713_1_p1;Ancoracysta_twista|GFYU01035247_1_p1;Ancoracysta_twista|GFYU01083299_1_p1;Hemimastix_kukwesjijk|EP00696_Hemimastix_kukwesjijk_P005011;Hemimastix_kukwesjijk|EP00696_Hemimastix_kukwesjijk_P016611;Meteora_sporadica|NODE_2348_length_2581_cov_19_004365_g19…
cluster177	GO:0016021; C:integral component of membrane; IEA:UniProtKB-KW	43	O43934	Ancoracysta_twista|GFYU01007322_1_p1;Ancoracysta_twista|GFYU01020429_1_p1;Ancoracysta_twista|GFYU01026706_1_p1;Hemimastix_kukwesjijk|EP00696_Hemimastix_kukwesjijk_P002148;Hemimastix_kukwesjijk|EP00696_Hemimastix_kukwesjijk_P006586;Meteora_sporadica|NODE_11042_length_561_cov_5_414000_g9310_i0;Meteora_sporadica|NODE_5888_length_1361_cov_37_374615_g4804_i0;Nebulomonas_marisrubri|TRINITY_DN13335_c0_g…
cluster178	GO:0006511; P:ubiquitin-dependent protein catabolic process; ISS:UniProtKB	43	F6UA42	Ancoracysta_twista|GFYU01008762_1_p1;Ancoracysta_twista|GFYU01011486_1_p2;Ancoracysta_twista|GFYU01066802_1_p1;Ancoracysta_twista|GFYU01067386_1_p1;Hemimastix_kukwesjijk|EP00696_Hemimastix_kukwesjijk_P001929;Hemimastix_kukwesjijk|EP00696_Hemimastix_kukwesjijk_P008936;Hemimastix_kukwesjijk|EP00696_Hemimastix_kukwesjijk_P014304;Hemimastix_kukwesjijk|EP00696_Hemimastix_kukwesjijk_P014324;Meteora_spo…
cluster184	GO:0019432; P:triglyceride biosynthetic process; IDA:UniProtKB	42	Q86VF5	Ancoracysta_twista|GFYU01002482_1_p1;Ancoracysta_twista|GFYU01002882_1_p1;Ancoracysta_twista|GFYU01003041_1_p1;Hemimastix_kukwesjijk|EP00696_Hemimastix_kukwesjijk_P002463;Hemimastix_kukwesjijk|EP00696_Hemimastix_kukwesjijk_P002466;Hemimastix_kukwesjijk|EP00696_Hemimastix_kukwesjijk_P005238;Hemimastix_kukwesjijk|EP00696_Hemimastix_kukwesjijk_P019571;Hemimastix_kukwesjijk|EP00696_Hemimastix_kukwesj…
cluster186	GO:0008289; F:lipid binding; IEA:UniProtKB-KW	42	Q8NC06	Ancoracysta_twista|GFYU01003454_1_p1;Ancoracysta_twista|GFYU01009346_1_p1;Ancoracysta_twista|GFYU01016655_1_p1;Ancoracysta_twista|GFYU01027524_1_p1;Hemimastix_kukwesjijk|EP00696_Hemimastix_kukwesjijk_P010404;Hemimastix_kukwesjijk|EP00696_Hemimastix_kukwesjijk_P010405;Hemimastix_kukwesjijk|EP00696_Hemimastix_kukwesjijk_P016935;Meteora_sporadica|NODE_3028_length_2205_cov_60_947295_g2454_i0;Nebulomo…
cluster187	GO:0031288; P:sorocarp morphogenesis; IMP:dictyBase	42	P28178	Ancoracysta_twista|GFYU01004850_1_p1;Ancoracysta_twista|GFYU01005758_1_p1;Ancoracysta_twista|GFYU01008967_1_p1;Ancoracysta_twista|GFYU01009074_1_p1;Hemimastix_kukwesjijk|EP00696_Hemimastix_kukwesjijk_P002045;Hemimastix_kukwesjijk|EP00696_Hemimastix_kukwesjijk_P009037;Meteora_sporadica|NODE_3269_length_2100_cov_1138_960275_g2649_i0;Meteora_sporadica|NODE_3742_length_1926_cov_8_835925_g3037_i0;Mete…
cluster189	GO:0005975; P:carbohydrate metabolic process; IEA:InterPro	42	P49614	Ancoracysta_twista|GFYU01006382_1_p1;Ancoracysta_twista|GFYU01008786_1_p1;Ancoracysta_twista|GFYU01023457_1_p1;Ancoracysta_twista|GFYU01023858_1_p1;Ancoracysta_twista|GFYU01026934_1_p1;Ancoracysta_twista|GFYU01029353_1_p1;Ancoracysta_twista|GFYU01038028_1_p1;Ancoracysta_twista|GFYU01060573_1_p1;Ancoracysta_twista|GFYU01068019_1_p1;Ancoracysta_twista|GFYU01072310_1_p1;Hemimastix_kukwesjijk|EP00696…
cluster191	GO:0008168; F:methyltransferase activity; IEA:UniProtKB-KW	42	Q5ZIZ2	Ancoracysta_twista|GFYU01016186_1_p1;Ancoracysta_twista|GFYU01065861_1_p1;Ancoracysta_twista|GFYU01067263_1_p1;Hemimastix_kukwesjijk|EP00696_Hemimastix_kukwesjijk_P007907;Hemimastix_kukwesjijk|EP00696_Hemimastix_kukwesjijk_P011216;Hemimastix_kukwesjijk|EP00696_Hemimastix_kukwesjijk_P016616;Meteora_sporadica|NODE_3939_length_1855_cov_17_433668_g3196_i0;Meteora_sporadica|NODE_4174_length_1778_cov_1…
cluster193	GO:0031397; P:negative regulation of protein ubiquitination; ISS:UniProtKB	41	Q6NXA9	Ancoracysta_twista|GFYU01000032_1_p2;Ancoracysta_twista|GFYU01001823_1_p1;Ancoracysta_twista|GFYU01004523_1_p2;Ancoracysta_twista|GFYU01008683_1_p1;Ancoracysta_twista|GFYU01011691_1_p2;Hemimastix_kukwesjijk|EP00696_Hemimastix_kukwesjijk_P003885;Hemimastix_kukwesjijk|EP00696_Hemimastix_kukwesjijk_P005734;Hemimastix_kukwesjijk|EP00696_Hemimastix_kukwesjijk_P010841;Hemimastix_kukwesjijk|EP00696_Hemi…
cluster194	GO:0046578; P:regulation of Ras protein signal transduction; IMP:dictyBase	41	Q55GN6	Ancoracysta_twista|GFYU01000717_1_p1;Ancoracysta_twista|GFYU01008946_1_p1;Ancoracysta_twista|GFYU01019298_1_p1;Ancoracysta_twista|GFYU01024715_1_p1;Ancoracysta_twista|GFYU01029817_1_p1;Ancoracysta_twista|GFYU01030364_1_p1;Ancoracysta_twista|GFYU01078711_1_p1;Ancoracysta_twista|GFYU01081845_1_p1;Hemimastix_kukwesjijk|EP00696_Hemimastix_kukwesjijk_P006071;Hemimastix_kukwesjijk|EP00696_Hemimastix_ku…
cluster195	GO:0010468; P:regulation of gene expression; IBA:GO_Central	41	A9S9Q8	Ancoracysta_twista|GFYU01000750_1_p1;Ancoracysta_twista|GFYU01001886_1_p1;Ancoracysta_twista|GFYU01008827_1_p1;Ancoracysta_twista|GFYU01014723_1_p1;Ancoracysta_twista|GFYU01086137_1_p1;Ancoracysta_twista|GFYU01086755_1_p1;Hemimastix_kukwesjijk|EP00696_Hemimastix_kukwesjijk_P019803;Hemimastix_kukwesjijk|EP00696_Hemimastix_kukwesjijk_P019804;Meteora_sporadica|NODE_13171_length_357_cov_2_777027_g114…
cluster196	GO:0010389; P:regulation of G2/M transition of mitotic cell cycle; IBA:GO_Central	41	P23111	Ancoracysta_twista|GFYU01000926_1_p1;Ancoracysta_twista|GFYU01002452_1_p1;Ancoracysta_twista|GFYU01016082_1_p1;Ancoracysta_twista|GFYU01023420_1_p1;Hemimastix_kukwesjijk|EP00696_Hemimastix_kukwesjijk_P003433;Hemimastix_kukwesjijk|EP00696_Hemimastix_kukwesjijk_P012165;Hemimastix_kukwesjijk|EP00696_Hemimastix_kukwesjijk_P016454;Meteora_sporadica|NODE_2955_length_2241_cov_145_825688_g2390_i0;Meteora…
cluster200	GO:0010182; P:sugar mediated signaling pathway; IMP:TAIR	41	Q9FJR0	Ancoracysta_twista|GFYU01007980_1_p1;Ancoracysta_twista|GFYU01019681_1_p1;Ancoracysta_twista|GFYU01034555_1_p1;Ancoracysta_twista|GFYU01038648_1_p1;Ancoracysta_twista|GFYU01039276_1_p1;Ancoracysta_twista|GFYU01043374_1_p1;Ancoracysta_twista|GFYU01086669_1_p1;Hemimastix_kukwesjijk|EP00696_Hemimastix_kukwesjijk_P010732;Meteora_sporadica|NODE_149_length_7764_cov_8_426847_g130_i0;Meteora_sporadica|NO…
cluster201	GO:0016567; P:protein ubiquitination; IBA:GO_Central	41	F4I8X6	Ancoracysta_twista|GFYU01010600_1_p1;Ancoracysta_twista|GFYU01021333_1_p1;Ancoracysta_twista|GFYU01023695_1_p1;Hemimastix_kukwesjijk|EP00696_Hemimastix_kukwesjijk_P019187;Meteora_sporadica|NODE_1759_length_2965_cov_152_853306_g1439_i0;Meteora_sporadica|NODE_1866_length_2886_cov_165_880354_g1439_i1;Meteora_sporadica|NODE_4212_length_1767_cov_15_537515_g3418_i0;Nebulomonas_marisrubri|TRINITY_DN1135…
cluster208	GO:0010200; P:response to chitin; IEP:TAIR	40	Q9LZW3	Ancoracysta_twista|GFYU01000409_1_p1;Ancoracysta_twista|GFYU01004616_1_p2;Ancoracysta_twista|GFYU01005375_1_p1;Ancoracysta_twista|GFYU01007000_1_p1;Ancoracysta_twista|GFYU01009943_1_p1;Ancoracysta_twista|GFYU01020423_1_p1;Ancoracysta_twista|GFYU01024167_1_p1;Ancoracysta_twista|GFYU01025593_1_p1;Hemimastix_kukwesjijk|EP00696_Hemimastix_kukwesjijk_P003866;Hemimastix_kukwesjijk|EP00696_Hemimastix_ku…
cluster211	GO:0016042; P:lipid catabolic process; IEA:UniProtKB-KW	40	Q93V61	Ancoracysta_twista|GFYU01001426_1_p1;Ancoracysta_twista|GFYU01007632_1_p1;Ancoracysta_twista|GFYU01013013_1_p1;Ancoracysta_twista|GFYU01015855_1_p1;Hemimastix_kukwesjijk|EP00696_Hemimastix_kukwesjijk_P015851;Hemimastix_kukwesjijk|EP00696_Hemimastix_kukwesjijk_P015852;Hemimastix_kukwesjijk|EP00696_Hemimastix_kukwesjijk_P015853;Hemimastix_kukwesjijk|EP00696_Hemimastix_kukwesjijk_P019289;Hemimastix_…
cluster212	GO:0061647; P:histone H3-K9 acetylation; IGI:TAIR	40	Q9FE17	Ancoracysta_twista|GFYU01001580_1_p1;Ancoracysta_twista|GFYU01005570_1_p1;Ancoracysta_twista|GFYU01006057_1_p1;Ancoracysta_twista|GFYU01019504_1_p1;Ancoracysta_twista|GFYU01025834_1_p1;Hemimastix_kukwesjijk|EP00696_Hemimastix_kukwesjijk_P000481;Hemimastix_kukwesjijk|EP00696_Hemimastix_kukwesjijk_P014529;Meteora_sporadica|NODE_3915_length_1865_cov_29_991131_g3175_i0;Nebulomonas_marisrubri|TRINITY_…
cluster213	GO:0003743; F:translation initiation factor activity; IEA:UniProtKB-KW	40	P41380	Ancoracysta_twista|GFYU01001581_1_p1;Ancoracysta_twista|GFYU01003360_1_p1;Ancoracysta_twista|GFYU01004626_1_p1;Ancoracysta_twista|GFYU01026559_1_p1;Hemimastix_kukwesjijk|EP00696_Hemimastix_kukwesjijk_P003078;Hemimastix_kukwesjijk|EP00696_Hemimastix_kukwesjijk_P004615;Hemimastix_kukwesjijk|EP00696_Hemimastix_kukwesjijk_P006955;Hemimastix_kukwesjijk|EP00696_Hemimastix_kukwesjijk_P011178;Hemimastix_…
cluster214	GO:0006108; P:malate metabolic process; IDA:MGI	40	P04634	Ancoracysta_twista|GFYU01002442_1_p1;Ancoracysta_twista|GFYU01004393_1_p1;Ancoracysta_twista|GFYU01005435_1_p1;Ancoracysta_twista|GFYU01006576_1_p1;Hemimastix_kukwesjijk|EP00696_Hemimastix_kukwesjijk_P004375;Hemimastix_kukwesjijk|EP00696_Hemimastix_kukwesjijk_P006012;Hemimastix_kukwesjijk|EP00696_Hemimastix_kukwesjijk_P008799;Hemimastix_kukwesjijk|EP00696_Hemimastix_kukwesjijk_P012827;Meteora_spo…
cluster217	GO:0097066; P:response to thyroid hormone; IEP:RGD	40	P29410	Ancoracysta_twista|GFYU01004832_1_p1;Ancoracysta_twista|GFYU01005393_1_p1;Ancoracysta_twista|GFYU01011903_1_p1;Ancoracysta_twista|GFYU01017901_1_p1;Ancoracysta_twista|GFYU01022322_1_p1;Hemimastix_kukwesjijk|EP00696_Hemimastix_kukwesjijk_P009167;Meteora_sporadica|NODE_8054_length_974_cov_70_360350_g6627_i0;Nebulomonas_marisrubri|TRINITY_DN12674_c0_g1_TRINITY_DN12674_c0_g1_i1_g_4436_m_4436;Nebulomo…
cluster218	GO:0004842; F:ubiquitin-protein transferase activity; IEA:InterPro	40	C6KTB7	Ancoracysta_twista|GFYU01008966_1_p1;Ancoracysta_twista|GFYU01012657_1_p1;Ancoracysta_twista|GFYU01015989_1_p1;Hemimastix_kukwesjijk|EP00696_Hemimastix_kukwesjijk_P001691;Hemimastix_kukwesjijk|EP00696_Hemimastix_kukwesjijk_P010341;Hemimastix_kukwesjijk|EP00696_Hemimastix_kukwesjijk_P010342;Hemimastix_kukwesjijk|EP00696_Hemimastix_kukwesjijk_P017392;Meteora_sporadica|NODE_1851_length_2900_cov_49_8…
cluster219	GO:0016192; P:vesicle-mediated transport; IEA:UniProtKB-KW	40	Q4R8X1	Ancoracysta_twista|GFYU01011637_1_p1;Ancoracysta_twista|GFYU01014542_1_p1;Ancoracysta_twista|GFYU01014798_1_p1;Ancoracysta_twista|GFYU01023418_1_p1;Ancoracysta_twista|GFYU01026446_1_p2;Hemimastix_kukwesjijk|EP00696_Hemimastix_kukwesjijk_P001971;Hemimastix_kukwesjijk|EP00696_Hemimastix_kukwesjijk_P007982;Meteora_sporadica|NODE_5937_length_1352_cov_74_238575_g4845_i0;Meteora_sporadica|NODE_6243_len…
cluster220	GO:0006685; P:sphingomyelin catabolic process; IEA:InterPro	40	Q92485	Ancoracysta_twista|GFYU01016230_1_p1;Ancoracysta_twista|GFYU01016322_1_p1;Hemimastix_kukwesjijk|EP00696_Hemimastix_kukwesjijk_P005979;Hemimastix_kukwesjijk|EP00696_Hemimastix_kukwesjijk_P011611;Hemimastix_kukwesjijk|EP00696_Hemimastix_kukwesjijk_P011612;Meteora_sporadica|NODE_2708_length_2366_cov_134_450325_g2194_i0;Meteora_sporadica|NODE_3642_length_1965_cov_177_276261_g2950_i0;Meteora_sporadica…
cluster226	GO:0005524; F:ATP binding; IEA:UniProtKB-KW	39	P02576	Ancoracysta_twista|GFYU01000073_1_p1;Ancoracysta_twista|GFYU01000089_1_p1;Ancoracysta_twista|GFYU01017998_1_p1;Ancoracysta_twista|GFYU01023385_1_p1;Hemimastix_kukwesjijk|EP00696_Hemimastix_kukwesjijk_P013205;Hemimastix_kukwesjijk|EP00696_Hemimastix_kukwesjijk_P013761;Hemimastix_kukwesjijk|EP00696_Hemimastix_kukwesjijk_P013936;Meteora_sporadica|NODE_1242_length_3483_cov_7402_584161_g1016_i0;Meteor…
cluster228	GO:0016567; P:protein ubiquitination; IBA:GO_Central	39	Q8H0T4	Ancoracysta_twista|GFYU01002163_1_p1;Ancoracysta_twista|GFYU01007825_1_p1;Ancoracysta_twista|GFYU01009231_1_p1;Ancoracysta_twista|GFYU01010921_1_p1;Hemimastix_kukwesjijk|EP00696_Hemimastix_kukwesjijk_P008646;Meteora_sporadica|NODE_2289_length_2613_cov_15_753918_g1856_i0;Meteora_sporadica|NODE_2621_length_2416_cov_12_872187_g2132_i0;Meteora_sporadica|NODE_3630_length_1969_cov_44_384172_g2939_i0;Me…
cluster232	GO:0010072; P:primary shoot apical meristem specification; IMP:TAIR	39	O04291	Ancoracysta_twista|GFYU01009260_1_p1;Ancoracysta_twista|GFYU01014109_1_p1;Ancoracysta_twista|GFYU01016345_1_p1;Ancoracysta_twista|GFYU01019844_1_p1;Ancoracysta_twista|GFYU01074857_1_p1;Hemimastix_kukwesjijk|EP00696_Hemimastix_kukwesjijk_P005254;Hemimastix_kukwesjijk|EP00696_Hemimastix_kukwesjijk_P007524;Hemimastix_kukwesjijk|EP00696_Hemimastix_kukwesjijk_P008744;Hemimastix_kukwesjijk|EP00696_Hemi…
cluster236	GO:0046872; F:metal ion binding; IEA:UniProtKB-KW	38	Q9LY77	Ancoracysta_twista|GFYU01000064_1_p1;Ancoracysta_twista|GFYU01003055_1_p1;Ancoracysta_twista|GFYU01011960_1_p1;Ancoracysta_twista|GFYU01012479_1_p1;Ancoracysta_twista|GFYU01023600_1_p1;Ancoracysta_twista|GFYU01027666_1_p1;Ancoracysta_twista|GFYU01047472_1_p1;Ancoracysta_twista|GFYU01057641_1_p1;Ancoracysta_twista|GFYU01073439_1_p1;Hemimastix_kukwesjijk|EP00696_Hemimastix_kukwesjijk_P004846;Meteor…
cluster240	GO:0030974; P:thiamine pyrophosphate transmembrane transport; IDA:UniProtKB	38	A0A1D6N272	Ancoracysta_twista|GFYU01003111_1_p1;Ancoracysta_twista|GFYU01005273_1_p1;Ancoracysta_twista|GFYU01006284_1_p1;Ancoracysta_twista|GFYU01019115_1_p1;Ancoracysta_twista|GFYU01053866_1_p1;Hemimastix_kukwesjijk|EP00696_Hemimastix_kukwesjijk_P008229;Meteora_sporadica|NODE_11013_length_565_cov_2_914683_g9282_i0;Meteora_sporadica|NODE_11499_length_510_cov_3_739421_g9746_i0;Meteora_sporadica|NODE_5235_le…
cluster241	GO:0031638; P:zymogen activation; IDA:UniProtKB	38	Q3ZCJ8	Ancoracysta_twista|GFYU01004424_1_p1;Ancoracysta_twista|GFYU01008069_1_p1;Ancoracysta_twista|GFYU01011620_1_p1;Ancoracysta_twista|GFYU01044766_1_p2;Hemimastix_kukwesjijk|EP00696_Hemimastix_kukwesjijk_P011726;Hemimastix_kukwesjijk|EP00696_Hemimastix_kukwesjijk_P013383;Hemimastix_kukwesjijk|EP00696_Hemimastix_kukwesjijk_P013384;Meteora_sporadica|NODE_3664_length_1953_cov_279_018499_g2969_i0;Meteora…
cluster244	GO:0033299; P:secretion of lysosomal enzymes; IMP:MGI	38	Q69ZN6	Ancoracysta_twista|GFYU01017632_1_p1;Ancoracysta_twista|GFYU01071925_1_p1;Ancoracysta_twista|GFYU01078201_1_p1;Hemimastix_kukwesjijk|EP00696_Hemimastix_kukwesjijk_P001788;Meteora_sporadica|NODE_1836_length_2908_cov_4_938883_g1500_i0;Meteora_sporadica|NODE_1933_length_2845_cov_9_326149_g1576_i0;Meteora_sporadica|NODE_3320_length_2082_cov_29_512123_g2689_i0;Meteora_sporadica|NODE_4576_length_1665_c…
cluster248	GO:0006446; P:regulation of translational initiation; ISS:UniProtKB	38	Q95L46	Ancoracysta_twista|GFYU01029669_1_p1;Ancoracysta_twista|GFYU01049906_1_p2;Ancoracysta_twista|GFYU01086556_1_p2;Hemimastix_kukwesjijk|EP00696_Hemimastix_kukwesjijk_P003010;Hemimastix_kukwesjijk|EP00696_Hemimastix_kukwesjijk_P008240;Hemimastix_kukwesjijk|EP00696_Hemimastix_kukwesjijk_P008241;Hemimastix_kukwesjijk|EP00696_Hemimastix_kukwesjijk_P009432;Meteora_sporadica|NODE_1792_length_2939_cov_35_4…
cluster250	GO:0071526; P:semaphorin-plexin signaling pathway; ISS:UniProtKB	37	P62998	Ancoracysta_twista|GFYU01000008_1_p2;Ancoracysta_twista|GFYU01002166_1_p1;Ancoracysta_twista|GFYU01052914_1_p1;Ancoracysta_twista|GFYU01054210_1_p1;Ancoracysta_twista|GFYU01079440_1_p1;Ancoracysta_twista|GFYU01087893_1_p1;Hemimastix_kukwesjijk|EP00696_Hemimastix_kukwesjijk_P008390;Hemimastix_kukwesjijk|EP00696_Hemimastix_kukwesjijk_P019346;Meteora_sporadica|NODE_9175_length_794_cov_2339_770805_g6…
cluster251	GO:0005509; F:calcium ion binding; IEA:InterPro	37	P27165	Ancoracysta_twista|GFYU01000431_1_p3;Ancoracysta_twista|GFYU01002293_1_p1;Ancoracysta_twista|GFYU01004349_1_p1;Ancoracysta_twista|GFYU01007164_1_p2;Ancoracysta_twista|GFYU01007868_1_p1;Ancoracysta_twista|GFYU01013499_1_p1;Ancoracysta_twista|GFYU01024304_1_p1;Ancoracysta_twista|GFYU01059967_1_p1;Ancoracysta_twista|GFYU01077718_1_p1;Hemimastix_kukwesjijk|EP00696_Hemimastix_kukwesjijk_P001467;Hemima…
cluster252	GO:0040040; P:thermosensory behavior; IMP:WormBase	37	Q9TXJ0	Ancoracysta_twista|GFYU01000711_1_p1;Ancoracysta_twista|GFYU01000904_1_p1;Ancoracysta_twista|GFYU01001657_1_p1;Ancoracysta_twista|GFYU01005849_1_p1;Ancoracysta_twista|GFYU01007919_1_p1;Ancoracysta_twista|GFYU01008145_1_p1;Hemimastix_kukwesjijk|EP00696_Hemimastix_kukwesjijk_P008426;Hemimastix_kukwesjijk|EP00696_Hemimastix_kukwesjijk_P016328;Meteora_sporadica|NODE_1212_length_3517_cov_95_192708_g99…
cluster256	GO:0090304; P:nucleic acid phosphodiester bond hydrolysis; IEA:GOC	37	Q61493	Ancoracysta_twista|GFYU01003823_1_p1;Ancoracysta_twista|GFYU01025191_1_p1;Ancoracysta_twista|GFYU01028391_1_p1;Ancoracysta_twista|GFYU01042350_1_p1;Ancoracysta_twista|GFYU01053149_1_p1;Ancoracysta_twista|GFYU01063029_1_p2;Ancoracysta_twista|GFYU01067025_1_p1;Hemimastix_kukwesjijk|EP00696_Hemimastix_kukwesjijk_P011691;Hemimastix_kukwesjijk|EP00696_Hemimastix_kukwesjijk_P011692;Hemimastix_kukwesjij…
cluster262	GO:0008643; P:carbohydrate transport; IEA:UniProtKB-KW	37	A7TES5	Ancoracysta_twista|GFYU01007872_1_p1;Ancoracysta_twista|GFYU01017382_1_p1;Hemimastix_kukwesjijk|EP00696_Hemimastix_kukwesjijk_P005001;Hemimastix_kukwesjijk|EP00696_Hemimastix_kukwesjijk_P016995;Meteora_sporadica|NODE_6366_length_1273_cov_4_011551_g5216_i0;Meteora_sporadica|NODE_7352_length_1091_cov_19_908738_g6032_i0;Nebulomonas_marisrubri|TRINITY_DN37867_c0_g1_TRINITY_DN37867_c0_g1_i1_g_30430_m_…
cluster264	GO:0051384; P:response to glucocorticoid; IEA:Ensembl	37	Q13219	Ancoracysta_twista|GFYU01033003_1_p1;Ancoracysta_twista|GFYU01062520_1_p1;Ancoracysta_twista|GFYU01077924_1_p1;Hemimastix_kukwesjijk|EP00696_Hemimastix_kukwesjijk_P011508;Meteora_sporadica|NODE_2876_length_2280_cov_512_630915_g2329_i0;Nebulomonas_marisrubri|TRINITY_DN11182_c0_g1_TRINITY_DN11182_c0_g1_i1_g_66390_m_66390;Nebulomonas_marisrubri|TRINITY_DN14132_c0_g1_TRINITY_DN14132_c0_g1_i1_g_88205_…
cluster268	GO:0015031; P:protein transport; IEA:UniProtKB-KW	36	P22125	Ancoracysta_twista|GFYU01000204_1_p1;Ancoracysta_twista|GFYU01000397_1_p1;Ancoracysta_twista|GFYU01000801_1_p1;Ancoracysta_twista|GFYU01003942_1_p1;Ancoracysta_twista|GFYU01021529_1_p1;Ancoracysta_twista|GFYU01026134_1_p1;Ancoracysta_twista|GFYU01029182_1_p1;Ancoracysta_twista|GFYU01044467_1_p1;Hemimastix_kukwesjijk|EP00696_Hemimastix_kukwesjijk_P000863;Hemimastix_kukwesjijk|EP00696_Hemimastix_ku…
cluster271	GO:0008474; F:palmitoyl-(protein) hydrolase activity; IEA:UniProtKB-EC	36	Q6DEY3	Ancoracysta_twista|GFYU01001545_1_p1;Ancoracysta_twista|GFYU01005566_1_p1;Ancoracysta_twista|GFYU01009691_1_p1;Ancoracysta_twista|GFYU01027556_1_p1;Ancoracysta_twista|GFYU01029729_1_p1;Hemimastix_kukwesjijk|EP00696_Hemimastix_kukwesjijk_P008157;Hemimastix_kukwesjijk|EP00696_Hemimastix_kukwesjijk_P017460;Meteora_sporadica|NODE_8003_length_982_cov_20_895765_g6588_i0;Nebulomonas_marisrubri|TRINITY_D…
cluster272	GO:0031098; P:stress-activated protein kinase signaling cascade; IBA:GO_Central	36	Q99KH8	Ancoracysta_twista|GFYU01002173_1_p1;Ancoracysta_twista|GFYU01003484_1_p1;Ancoracysta_twista|GFYU01003870_1_p1;Hemimastix_kukwesjijk|EP00696_Hemimastix_kukwesjijk_P003509;Meteora_sporadica|NODE_2761_length_2343_cov_108_167835_g2233_i0;Meteora_sporadica|NODE_2912_length_2260_cov_67_573442_g2359_i0;Meteora_sporadica|NODE_4553_length_1669_cov_262_526119_g3687_i0;Meteora_sporadica|NODE_5066_length_15…
cluster273	GO:0015914; P:phospholipid transport; IEA:GOC	36	P33324	Ancoracysta_twista|GFYU01002934_1_p1;Ancoracysta_twista|GFYU01030277_1_p1;Ancoracysta_twista|GFYU01051868_1_p1;Hemimastix_kukwesjijk|EP00696_Hemimastix_kukwesjijk_P001092;Meteora_sporadica|NODE_5863_length_1364_cov_17_057559_g4784_i0;Meteora_sporadica|NODE_6533_length_1246_cov_19_831224_g5356_i0;Meteora_sporadica|NODE_8077_length_971_cov_24_023077_g6648_i0;Meteora_sporadica|NODE_8102_length_967_c…
cluster275	GO:0006493; P:protein O-linked glycosylation; ISS:UniProtKB	36	A0JND3	Ancoracysta_twista|GFYU01004154_1_p1;Ancoracysta_twista|GFYU01016485_1_p1;Ancoracysta_twista|GFYU01025360_1_p1;Ancoracysta_twista|GFYU01027372_1_p1;Ancoracysta_twista|GFYU01030752_1_p1;Hemimastix_kukwesjijk|EP00696_Hemimastix_kukwesjijk_P002488;Hemimastix_kukwesjijk|EP00696_Hemimastix_kukwesjijk_P012180;Meteora_sporadica|NODE_3729_length_1932_cov_16_024586_g3024_i0;Nebulomonas_marisrubri|TRINITY_…
cluster277	GO:0046872; F:metal ion binding; IEA:UniProtKB-KW	36	P02871	Ancoracysta_twista|GFYU01016920_1_p1;Ancoracysta_twista|GFYU01030336_1_p1;Ancoracysta_twista|GFYU01039384_1_p1;Ancoracysta_twista|GFYU01043940_1_p1;Ancoracysta_twista|GFYU01046185_1_p1;Ancoracysta_twista|GFYU01051786_1_p1;Ancoracysta_twista|GFYU01056761_1_p1;Ancoracysta_twista|GFYU01066826_1_p3;Hemimastix_kukwesjijk|EP00696_Hemimastix_kukwesjijk_P018764;Meteora_sporadica|NODE_5558_length_1427_cov…
cluster282	GO:0031285; P:regulation of sorocarp stalk cell differentiation; IMP:dictyBase	35	Q55F37	Ancoracysta_twista|GFYU01000140_1_p1;Ancoracysta_twista|GFYU01001658_1_p1;Ancoracysta_twista|GFYU01001967_1_p1;Ancoracysta_twista|GFYU01003568_1_p1;Ancoracysta_twista|GFYU01014224_1_p1;Hemimastix_kukwesjijk|EP00696_Hemimastix_kukwesjijk_P008902;Hemimastix_kukwesjijk|EP00696_Hemimastix_kukwesjijk_P011426;Hemimastix_kukwesjijk|EP00696_Hemimastix_kukwesjijk_P012574;Meteora_sporadica|NODE_7600_length…
cluster284	GO:0051791; P:medium-chain fatty acid metabolic process; TAS:TAIR	35	P0CZ23	Ancoracysta_twista|GFYU01001273_1_p1;Ancoracysta_twista|GFYU01006505_1_p1;Ancoracysta_twista|GFYU01009069_1_p1;Ancoracysta_twista|GFYU01011232_1_p1;Ancoracysta_twista|GFYU01012414_1_p1;Ancoracysta_twista|GFYU01017654_1_p1;Ancoracysta_twista|GFYU01023875_1_p1;Hemimastix_kukwesjijk|EP00696_Hemimastix_kukwesjijk_P001710;Hemimastix_kukwesjijk|EP00696_Hemimastix_kukwesjijk_P007450;Hemimastix_kukwesjij…
cluster285	GO:0006833; P:water transport; IMP:MGI	35	P55088	Ancoracysta_twista|GFYU01001698_1_p2;Ancoracysta_twista|GFYU01012272_1_p1;Ancoracysta_twista|GFYU01019355_1_p1;Hemimastix_kukwesjijk|EP00696_Hemimastix_kukwesjijk_P004309;Hemimastix_kukwesjijk|EP00696_Hemimastix_kukwesjijk_P007029;Meteora_sporadica|NODE_7388_length_1085_cov_100_703125_g6063_i0;Meteora_sporadica|NODE_8422_length_913_cov_71_073944_g6956_i0;Meteora_sporadica|NODE_9821_length_711_cov…
cluster286	GO:0004721; F:phosphoprotein phosphatase activity; IBA:GO_Central	35	Q54GB2	Ancoracysta_twista|GFYU01002033_1_p1;Ancoracysta_twista|GFYU01012405_1_p1;Ancoracysta_twista|GFYU01013127_1_p1;Ancoracysta_twista|GFYU01026863_1_p1;Hemimastix_kukwesjijk|EP00696_Hemimastix_kukwesjijk_P011895;Hemimastix_kukwesjijk|EP00696_Hemimastix_kukwesjijk_P012053;Hemimastix_kukwesjijk|EP00696_Hemimastix_kukwesjijk_P014276;Hemimastix_kukwesjijk|EP00696_Hemimastix_kukwesjijk_P014277;Meteora_spo…
cluster288	GO:0043132; P:NAD transport; IDA:TAIR	35	Q8RWA5	Ancoracysta_twista|GFYU01003145_1_p1;Ancoracysta_twista|GFYU01004467_1_p1;Ancoracysta_twista|GFYU01017788_1_p1;Hemimastix_kukwesjijk|EP00696_Hemimastix_kukwesjijk_P015038;Hemimastix_kukwesjijk|EP00696_Hemimastix_kukwesjijk_P016199;Meteora_sporadica|NODE_4058_length_1812_cov_8_218732_g3292_i0;Meteora_sporadica|NODE_6157_length_1310_cov_7_999199_g5037_i0;Nebulomonas_marisrubri|TRINITY_DN12389_c0_g1…
cluster290	GO:0009615; P:response to virus; IEA:Ensembl	35	Q9UBH6	Ancoracysta_twista|GFYU01005794_1_p1;Ancoracysta_twista|GFYU01009129_1_p1;Ancoracysta_twista|GFYU01014289_1_p1;Hemimastix_kukwesjijk|EP00696_Hemimastix_kukwesjijk_P002227;Hemimastix_kukwesjijk|EP00696_Hemimastix_kukwesjijk_P008245;Hemimastix_kukwesjijk|EP00696_Hemimastix_kukwesjijk_P008255;Meteora_sporadica|NODE_3130_length_2162_cov_8_281771_g2539_i0;Meteora_sporadica|NODE_4124_length_1794_cov_5_…
cluster291	GO:0016192; P:vesicle-mediated transport; IBA:GO_Central	35	Q96JC1	Ancoracysta_twista|GFYU01007098_1_p1;Ancoracysta_twista|GFYU01020354_1_p1;Ancoracysta_twista|GFYU01031893_1_p1;Ancoracysta_twista|GFYU01055585_1_p1;Ancoracysta_twista|GFYU01066025_1_p1;Hemimastix_kukwesjijk|EP00696_Hemimastix_kukwesjijk_P011517;Hemimastix_kukwesjijk|EP00696_Hemimastix_kukwesjijk_P017242;Hemimastix_kukwesjijk|EP00696_Hemimastix_kukwesjijk_P019789;Meteora_sporadica|NODE_11160_lengt…
cluster299	GO:0006413; P:translational initiation; ISS:UniProtKB	34	Q6MG08	Ancoracysta_twista|GFYU01001340_1_p1;Ancoracysta_twista|GFYU01008833_1_p1;Ancoracysta_twista|GFYU01020077_1_p1;Ancoracysta_twista|GFYU01022578_1_p1;Ancoracysta_twista|GFYU01047249_1_p1;Hemimastix_kukwesjijk|EP00696_Hemimastix_kukwesjijk_P010944;Meteora_sporadica|NODE_2347_length_2581_cov_21_794048_g1906_i0;Meteora_sporadica|NODE_2948_length_2245_cov_8_514194_g2386_i0;Meteora_sporadica|NODE_4230_l…
cluster300	GO:0043622; P:cortical microtubule organization; IMP:UniProtKB	34	Q9FZ36	Ancoracysta_twista|GFYU01001526_1_p1;Ancoracysta_twista|GFYU01003532_1_p1;Ancoracysta_twista|GFYU01007794_1_p1;Ancoracysta_twista|GFYU01012484_1_p1;Ancoracysta_twista|GFYU01013808_1_p1;Ancoracysta_twista|GFYU01017675_1_p1;Hemimastix_kukwesjijk|EP00696_Hemimastix_kukwesjijk_P015145;Meteora_sporadica|NODE_371_length_5686_cov_34_331733_g307_i0;Meteora_sporadica|NODE_409_length_5460_cov_49_359881_g33…
cluster302	GO:0008654; P:phospholipid biosynthetic process; IEA:InterPro	34	Q54XM0	Ancoracysta_twista|GFYU01001894_1_p1;Ancoracysta_twista|GFYU01004531_1_p1;Ancoracysta_twista|GFYU01013562_1_p1;Hemimastix_kukwesjijk|EP00696_Hemimastix_kukwesjijk_P009699;Meteora_sporadica|NODE_12079_length_451_cov_2_600000_g10318_i0;Meteora_sporadica|NODE_6600_length_1231_cov_14_124786_g5410_i0;Meteora_sporadica|NODE_6931_length_1165_cov_16_259964_g5691_i0;Nebulomonas_marisrubri|TRINITY_DN11460_…
cluster303	N/A	34	P0C7V8	Ancoracysta_twista|GFYU01002209_1_p1;Ancoracysta_twista|GFYU01016076_1_p1;Ancoracysta_twista|GFYU01016536_1_p1;Ancoracysta_twista|GFYU01021817_1_p1;Hemimastix_kukwesjijk|EP00696_Hemimastix_kukwesjijk_P009647;Meteora_sporadica|NODE_3993_length_1835_cov_25_491545_g3241_i0;Meteora_sporadica|NODE_6914_length_1168_cov_14_784101_g5679_i0;Nebulomonas_marisrubri|TRINITY_DN13395_c2_g4_TRINITY_DN13395_c2_g…
cluster304	GO:0031098; P:stress-activated protein kinase signaling cascade; IBA:GO_Central	34	O80396	Ancoracysta_twista|GFYU01002389_1_p1;Ancoracysta_twista|GFYU01002408_1_p1;Ancoracysta_twista|GFYU01004868_1_p1;Hemimastix_kukwesjijk|EP00696_Hemimastix_kukwesjijk_P014991;Meteora_sporadica|NODE_6637_length_1224_cov_202_181427_g5443_i0;Meteora_sporadica|NODE_6813_length_1188_cov_74_211180_g5590_i0;Meteora_sporadica|NODE_7517_length_1066_cov_246_433831_g5443_i1;Meteora_sporadica|NODE_7576_length_10…
cluster305	GO:0035206; P:regulation of hemocyte proliferation; IMP:FlyBase	34	Q9V4N3	Ancoracysta_twista|GFYU01002945_1_p1;Ancoracysta_twista|GFYU01013233_1_p1;Ancoracysta_twista|GFYU01040053_1_p1;Ancoracysta_twista|GFYU01060475_1_p1;Ancoracysta_twista|GFYU01065956_1_p1;Hemimastix_kukwesjijk|EP00696_Hemimastix_kukwesjijk_P006809;Hemimastix_kukwesjijk|EP00696_Hemimastix_kukwesjijk_P015332;Hemimastix_kukwesjijk|EP00696_Hemimastix_kukwesjijk_P016957;Hemimastix_kukwesjijk|EP00696_Hemi…
cluster309	GO:0006612; P:protein targeting to membrane; IBA:GO_Central	34	Q9SB58	Ancoracysta_twista|GFYU01004920_1_p1;Ancoracysta_twista|GFYU01007906_1_p1;Ancoracysta_twista|GFYU01009227_1_p1;Ancoracysta_twista|GFYU01010476_1_p1;Ancoracysta_twista|GFYU01019955_1_p1;Hemimastix_kukwesjijk|EP00696_Hemimastix_kukwesjijk_P016113;Hemimastix_kukwesjijk|EP00696_Hemimastix_kukwesjijk_P017082;Meteora_sporadica|NODE_7207_length_1115_cov_20_388046_g5916_i0;Nebulomonas_marisrubri|TRINITY_…
cluster310	GO:0007283; P:spermatogenesis; IEA:UniProtKB-UniRule	34	Q5U3S1	Ancoracysta_twista|GFYU01004958_1_p1;Ancoracysta_twista|GFYU01009149_1_p1;Ancoracysta_twista|GFYU01023591_1_p1;Ancoracysta_twista|GFYU01024110_1_p1;Ancoracysta_twista|GFYU01082342_1_p1;Hemimastix_kukwesjijk|EP00696_Hemimastix_kukwesjijk_P019785;Meteora_sporadica|NODE_1661_length_3036_cov_46_048403_g1358_i0;Meteora_sporadica|NODE_4652_length_1644_cov_3_900190_g3771_i0;Nebulomonas_marisrubri|TRINIT…
cluster313	GO:0006431; P:methionyl-tRNA aminoacylation; IEA:InterPro	34	Q9ZTS1	Ancoracysta_twista|GFYU01015051_1_p2;Ancoracysta_twista|GFYU01018748_1_p1;Ancoracysta_twista|GFYU01025966_1_p2;Ancoracysta_twista|GFYU01048062_1_p1;Hemimastix_kukwesjijk|EP00696_Hemimastix_kukwesjijk_P008789;Hemimastix_kukwesjijk|EP00696_Hemimastix_kukwesjijk_P011501;Hemimastix_kukwesjijk|EP00696_Hemimastix_kukwesjijk_P018824;Meteora_sporadica|NODE_6353_length_1275_cov_66_892092_g5204_i0;Meteora_…
cluster314	GO:0006730; P:one-carbon metabolic process; IEA:InterPro	34	Q865C0	Ancoracysta_twista|GFYU01017858_1_p1;Hemimastix_kukwesjijk|EP00696_Hemimastix_kukwesjijk_P003113;Hemimastix_kukwesjijk|EP00696_Hemimastix_kukwesjijk_P006411;Hemimastix_kukwesjijk|EP00696_Hemimastix_kukwesjijk_P010920;Hemimastix_kukwesjijk|EP00696_Hemimastix_kukwesjijk_P016161;Meteora_sporadica|NODE_3202_length_2130_cov_820_680039_g2595_i0;Meteora_sporadica|NODE_6945_length_1161_cov_80_826364_g570…
cluster319	GO:0042572; P:retinol metabolic process; ISS:HGNC	33	Q6NUM9	Ancoracysta_twista|GFYU01000146_1_p1;Ancoracysta_twista|GFYU01010252_1_p1;Ancoracysta_twista|GFYU01010704_1_p1;Ancoracysta_twista|GFYU01028803_1_p1;Ancoracysta_twista|GFYU01031001_1_p1;Ancoracysta_twista|GFYU01032736_1_p1;Ancoracysta_twista|GFYU01092992_1_p1;Hemimastix_kukwesjijk|EP00696_Hemimastix_kukwesjijk_P005232;Hemimastix_kukwesjijk|EP00696_Hemimastix_kukwesjijk_P007828;Meteora_sporadica|NO…
cluster320	GO:0016567; P:protein ubiquitination; IDA:UniProtKB	33	Q8LPQ5	Ancoracysta_twista|GFYU01001354_1_p1;Ancoracysta_twista|GFYU01002497_1_p1;Ancoracysta_twista|GFYU01004607_1_p1;Ancoracysta_twista|GFYU01011107_1_p1;Ancoracysta_twista|GFYU01040094_1_p1;Hemimastix_kukwesjijk|EP00696_Hemimastix_kukwesjijk_P009197;Hemimastix_kukwesjijk|EP00696_Hemimastix_kukwesjijk_P015817;Hemimastix_kukwesjijk|EP00696_Hemimastix_kukwesjijk_P015820;Meteora_sporadica|NODE_6584_length…
cluster321	GO:0016021; C:integral component of membrane; IBA:GO_Central	33	Q17QL9	Ancoracysta_twista|GFYU01001541_1_p1;Ancoracysta_twista|GFYU01004073_1_p1;Ancoracysta_twista|GFYU01004085_1_p1;Ancoracysta_twista|GFYU01004583_1_p1;Hemimastix_kukwesjijk|EP00696_Hemimastix_kukwesjijk_P017904;Meteora_sporadica|NODE_11212_length_541_cov_24_185417_g9472_i0;Meteora_sporadica|NODE_5396_length_1464_cov_10_044904_g4382_i0;Meteora_sporadica|NODE_6140_length_1313_cov_44_375399_g1752_i2;Me…
cluster323	GO:0008654; P:phospholipid biosynthetic process; IEA:UniProtKB-KW	33	Q7SZQ0	Ancoracysta_twista|GFYU01002763_1_p2;Ancoracysta_twista|GFYU01004368_1_p1;Ancoracysta_twista|GFYU01014336_1_p1;Hemimastix_kukwesjijk|EP00696_Hemimastix_kukwesjijk_P018233;Meteora_sporadica|NODE_4963_length_1564_cov_6_836327_g4014_i0;Meteora_sporadica|NODE_5576_length_1424_cov_20_393250_g4534_i0;Meteora_sporadica|NODE_5616_length_1416_cov_56_439852_g4567_i0;Nebulomonas_marisrubri|TRINITY_DN29482_c…
cluster324	GO:0003746; F:translation elongation factor activity; IEA:UniProtKB-KW	33	P26642	Ancoracysta_twista|GFYU01002877_1_p1;Ancoracysta_twista|GFYU01004482_1_p1;Ancoracysta_twista|GFYU01006674_1_p1;Ancoracysta_twista|GFYU01010158_1_p1;Hemimastix_kukwesjijk|EP00696_Hemimastix_kukwesjijk_P005198;Hemimastix_kukwesjijk|EP00696_Hemimastix_kukwesjijk_P008360;Hemimastix_kukwesjijk|EP00696_Hemimastix_kukwesjijk_P017359;Meteora_sporadica|NODE_7964_length_989_cov_180_324353_g6557_i0;Meteora_…
cluster325	GO:0045493; P:xylan catabolic process; IBA:GO_Central	33	Q9LXD6	Ancoracysta_twista|GFYU01004121_1_p1;Ancoracysta_twista|GFYU01004271_1_p1;Hemimastix_kukwesjijk|EP00696_Hemimastix_kukwesjijk_P007831;Hemimastix_kukwesjijk|EP00696_Hemimastix_kukwesjijk_P007832;Hemimastix_kukwesjijk|EP00696_Hemimastix_kukwesjijk_P007834;Hemimastix_kukwesjijk|EP00696_Hemimastix_kukwesjijk_P007835;Hemimastix_kukwesjijk|EP00696_Hemimastix_kukwesjijk_P012186;Meteora_sporadica|NODE_28…
cluster329	N/A	33	N/A	Ancoracysta_twista|GFYU01004661_1_p1;Ancoracysta_twista|GFYU01016495_1_p1;Ancoracysta_twista|GFYU01036025_1_p1;Ancoracysta_twista|GFYU01056407_1_p1;Ancoracysta_twista|GFYU01069872_1_p1;Hemimastix_kukwesjijk|EP00696_Hemimastix_kukwesjijk_P014295;Hemimastix_kukwesjijk|EP00696_Hemimastix_kukwesjijk_P019273;Meteora_sporadica|NODE_10447_length_631_cov_1294_619298_g2813_i2;Meteora_sporadica|NODE_3478_l…
cluster332	GO:0010028; P:xanthophyll cycle; IMP:TAIR	33	Q8GX78	Ancoracysta_twista|GFYU01023060_1_p1;Hemimastix_kukwesjijk|EP00696_Hemimastix_kukwesjijk_P000268;Hemimastix_kukwesjijk|EP00696_Hemimastix_kukwesjijk_P000282;Hemimastix_kukwesjijk|EP00696_Hemimastix_kukwesjijk_P003404;Meteora_sporadica|NODE_4290_length_1739_cov_7_394517_g3479_i0;Nebulomonas_marisrubri|TRINITY_DN9918_c0_g1_TRINITY_DN9918_c0_g1_i1_g_12117_m_12117;Nibbleromonas_arcticus|TRINITY_DN204…
cluster336	GO:0007264; P:small GTPase mediated signal transduction; ISS:UniProtKB	32	Q8QHI3	Ancoracysta_twista|GFYU01000682_1_p1;Ancoracysta_twista|GFYU01008083_1_p1;Ancoracysta_twista|GFYU01028850_1_p1;Hemimastix_kukwesjijk|EP00696_Hemimastix_kukwesjijk_P002895;Hemimastix_kukwesjijk|EP00696_Hemimastix_kukwesjijk_P006605;Meteora_sporadica|NODE_10182_length_664_cov_58_280265_g8511_i0;Nebulomonas_marisrubri|TRINITY_DN5021_c0_g1_TRINITY_DN5021_c0_g1_i1_g_65871_m_65871;Nebulomonas_marisrubr…
cluster338	GO:0060586; P:multicellular organismal iron ion homeostasis; IMP:MGI	32	Q9QUT0	Ancoracysta_twista|GFYU01001452_1_p1;Ancoracysta_twista|GFYU01001822_1_p1;Ancoracysta_twista|GFYU01053900_1_p1;Ancoracysta_twista|GFYU01065622_1_p1;Ancoracysta_twista|GFYU01066308_1_p1;Hemimastix_kukwesjijk|EP00696_Hemimastix_kukwesjijk_P008398;Hemimastix_kukwesjijk|EP00696_Hemimastix_kukwesjijk_P008401;Hemimastix_kukwesjijk|EP00696_Hemimastix_kukwesjijk_P008402;Hemimastix_kukwesjijk|EP00696_Hemi…
cluster339	GO:0090042; P:tubulin deacetylation; ISS:UniProtKB	32	Q5RBF1	Ancoracysta_twista|GFYU01001523_1_p1;Ancoracysta_twista|GFYU01003442_1_p1;Ancoracysta_twista|GFYU01012590_1_p1;Ancoracysta_twista|GFYU01029919_1_p1;Ancoracysta_twista|GFYU01061203_1_p1;Hemimastix_kukwesjijk|EP00696_Hemimastix_kukwesjijk_P006690;Hemimastix_kukwesjijk|EP00696_Hemimastix_kukwesjijk_P014239;Hemimastix_kukwesjijk|EP00696_Hemimastix_kukwesjijk_P014241;Hemimastix_kukwesjijk|EP00696_Hemi…
cluster340	GO:0008270; F:zinc ion binding; IEA:InterPro	32	Q5HM44	Ancoracysta_twista|GFYU01001868_1_p1;Ancoracysta_twista|GFYU01015122_1_p1;Ancoracysta_twista|GFYU01021519_1_p1;Hemimastix_kukwesjijk|EP00696_Hemimastix_kukwesjijk_P003454;Meteora_sporadica|NODE_5429_length_1455_cov_80_643472_g4412_i0;Nebulomonas_marisrubri|TRINITY_DN12131_c0_g1_TRINITY_DN12131_c0_g1_i1_g_16711_m_16711;Nebulomonas_marisrubri|TRINITY_DN12904_c0_g1_TRINITY_DN12904_c0_g1_i3_g_59595_m…
cluster341	GO:1902600; P:proton transmembrane transport; IEA:InterPro	32	P21616	Ancoracysta_twista|GFYU01001908_1_p2;Ancoracysta_twista|GFYU01008826_1_p1;Ancoracysta_twista|GFYU01014123_1_p3;Ancoracysta_twista|GFYU01014544_1_p3;Ancoracysta_twista|GFYU01019112_1_p1;Ancoracysta_twista|GFYU01022480_1_p1;Hemimastix_kukwesjijk|EP00696_Hemimastix_kukwesjijk_P018960;Meteora_sporadica|NODE_2357_length_2575_cov_188_163087_g1914_i0;Meteora_sporadica|NODE_3035_length_2202_cov_64_903316…
cluster342	GO:0006203; P:dGTP catabolic process; IBA:GO_Central	32	Q9CA40	Ancoracysta_twista|GFYU01002101_1_p1;Ancoracysta_twista|GFYU01009139_1_p1;Ancoracysta_twista|GFYU01010826_1_p1;Ancoracysta_twista|GFYU01014465_1_p2;Ancoracysta_twista|GFYU01032528_1_p1;Hemimastix_kukwesjijk|EP00696_Hemimastix_kukwesjijk_P002520;Hemimastix_kukwesjijk|EP00696_Hemimastix_kukwesjijk_P006237;Hemimastix_kukwesjijk|EP00696_Hemimastix_kukwesjijk_P006561;Hemimastix_kukwesjijk|EP00696_Hemi…
cluster344	GO:0009826; P:unidimensional cell growth; IMP:TAIR	32	Q8RWY6	Ancoracysta_twista|GFYU01007018_1_p1;Ancoracysta_twista|GFYU01012097_1_p1;Ancoracysta_twista|GFYU01020464_1_p1;Ancoracysta_twista|GFYU01030855_1_p1;Hemimastix_kukwesjijk|EP00696_Hemimastix_kukwesjijk_P013311;Meteora_sporadica|NODE_2770_length_2338_cov_58_369346_g2241_i0;Meteora_sporadica|NODE_286_length_6197_cov_124_267601_g244_i0;Meteora_sporadica|NODE_5016_length_1552_cov_8_535211_g4060_i0;Mete…
cluster346	GO:0007601; P:visual perception; IEA:UniProtKB-KW	32	P0C588	Ancoracysta_twista|GFYU01011979_1_p1;Ancoracysta_twista|GFYU01019923_1_p1;Ancoracysta_twista|GFYU01020243_1_p1;Ancoracysta_twista|GFYU01055661_1_p1;Hemimastix_kukwesjijk|EP00696_Hemimastix_kukwesjijk_P019223;Meteora_sporadica|NODE_10135_length_670_cov_19_198686_g7946_i1;Meteora_sporadica|NODE_4145_length_1788_cov_13_350318_g3364_i0;Meteora_sporadica|NODE_9556_length_742_cov_17_287812_g7946_i0;Neb…
cluster355	GO:0019430; P:removal of superoxide radicals; IBA:GO_Central	31	Q54TW8	Ancoracysta_twista|GFYU01001419_1_p1;Ancoracysta_twista|GFYU01005093_1_p2;Ancoracysta_twista|GFYU01007512_1_p2;Ancoracysta_twista|GFYU01053523_1_p1;Hemimastix_kukwesjijk|EP00696_Hemimastix_kukwesjijk_P002387;Hemimastix_kukwesjijk|EP00696_Hemimastix_kukwesjijk_P002388;Hemimastix_kukwesjijk|EP00696_Hemimastix_kukwesjijk_P009295;Hemimastix_kukwesjijk|EP00696_Hemimastix_kukwesjijk_P014608;Hemimastix_…
cluster357	GO:0006355; P:regulation of transcription, DNA-templated; IBA:GO_Central	31	A8IEF3	Ancoracysta_twista|GFYU01001911_1_p1;Ancoracysta_twista|GFYU01009560_1_p1;Hemimastix_kukwesjijk|EP00696_Hemimastix_kukwesjijk_P001009;Hemimastix_kukwesjijk|EP00696_Hemimastix_kukwesjijk_P017129;Hemimastix_kukwesjijk|EP00696_Hemimastix_kukwesjijk_P017132;Meteora_sporadica|NODE_3880_length_1881_cov_24_817582_g3147_i0;Meteora_sporadica|NODE_4396_length_1711_cov_12_964848_g3559_i0;Meteora_sporadica|N…
cluster361	GO:0009408; P:response to heat; IMP:FlyBase	31	O46043	Ancoracysta_twista|GFYU01005263_1_p1;Hemimastix_kukwesjijk|EP00696_Hemimastix_kukwesjijk_P007433;Hemimastix_kukwesjijk|EP00696_Hemimastix_kukwesjijk_P010113;Hemimastix_kukwesjijk|EP00696_Hemimastix_kukwesjijk_P014588;Hemimastix_kukwesjijk|EP00696_Hemimastix_kukwesjijk_P016536;Hemimastix_kukwesjijk|EP00696_Hemimastix_kukwesjijk_P016537;Meteora_sporadica|NODE_3286_length_2095_cov_9_658309_g2661_i0;…
cluster362	GO:0000388; P:spliceosome conformational change to release U4 (or U4atac) and U1 (or U11); IBA:GO_Central	31	O75643	Ancoracysta_twista|GFYU01007260_1_p1;Ancoracysta_twista|GFYU01024747_1_p2;Ancoracysta_twista|GFYU01063184_1_p1;Ancoracysta_twista|GFYU01069623_1_p1;Hemimastix_kukwesjijk|EP00696_Hemimastix_kukwesjijk_P000951;Hemimastix_kukwesjijk|EP00696_Hemimastix_kukwesjijk_P007609;Meteora_sporadica|NODE_236_length_6665_cov_13_636281_g202_i0;Meteora_sporadica|NODE_237_length_6664_cov_15_457974_g203_i0;Nebulomon…
cluster364	GO:0015893; P:drug transport; ISO:MGI	31	Q78KK3	Ancoracysta_twista|GFYU01008405_1_p1;Ancoracysta_twista|GFYU01023335_1_p1;Hemimastix_kukwesjijk|EP00696_Hemimastix_kukwesjijk_P006569;Hemimastix_kukwesjijk|EP00696_Hemimastix_kukwesjijk_P014428;Meteora_sporadica|NODE_11345_length_526_cov_2_352688_g9598_i0;Meteora_sporadica|NODE_13471_length_336_cov_2_792727_g11708_i0;Meteora_sporadica|NODE_3919_length_1864_cov_20_792568_g3179_i0;Meteora_sporadica…
cluster369	GO:0070212; P:protein poly-ADP-ribosylation; IBA:GO_Central	31	Q9UGN5	Ancoracysta_twista|GFYU01016901_1_p1;Ancoracysta_twista|GFYU01022526_1_p1;Ancoracysta_twista|GFYU01074571_1_p1;Hemimastix_kukwesjijk|EP00696_Hemimastix_kukwesjijk_P019757;Meteora_sporadica|NODE_274_length_6269_cov_66_131604_g233_i0;Meteora_sporadica|NODE_3348_length_2073_cov_45_909046_g2707_i0;Meteora_sporadica|NODE_897_length_3993_cov_29_221516_g729_i0;Meteora_sporadica|NODE_923_length_3951_cov_…
cluster371	GO:0030435; P:sporulation resulting in formation of a cellular spore; IMP:dictyBase	31	Q54JL7	Ancoracysta_twista|GFYU01048139_1_p1;Hemimastix_kukwesjijk|EP00696_Hemimastix_kukwesjijk_P007492;Meteora_sporadica|NODE_4383_length_1715_cov_34_567110_g3548_i0;Meteora_sporadica|NODE_4979_length_1560_cov_21_413609_g4026_i0;Meteora_sporadica|NODE_6109_length_1317_cov_12_731688_g4995_i0;Meteora_sporadica|NODE_6516_length_1249_cov_23_720539_g5342_i0;Nebulomonas_marisrubri|TRINITY_DN10614_c0_g1_TRINI…
cluster373	GO:0006986; P:response to unfolded protein; TAS:ProtInc	30	Q9UDY4	Ancoracysta_twista|GFYU01000031_1_p1;Ancoracysta_twista|GFYU01001688_1_p1;Ancoracysta_twista|GFYU01037219_1_p1;Ancoracysta_twista|GFYU01059603_1_p1;Hemimastix_kukwesjijk|EP00696_Hemimastix_kukwesjijk_P015726;Hemimastix_kukwesjijk|EP00696_Hemimastix_kukwesjijk_P016615;Hemimastix_kukwesjijk|EP00696_Hemimastix_kukwesjijk_P018116;Meteora_sporadica|NODE_5209_length_1502_cov_39_867453_g4224_i0;Meteora_…
cluster375	GO:0006511; P:ubiquitin-dependent protein catabolic process; IMP:PomBase	30	P46595	Ancoracysta_twista|GFYU01000931_1_p1;Ancoracysta_twista|GFYU01002831_1_p1;Ancoracysta_twista|GFYU01023712_1_p1;Ancoracysta_twista|GFYU01023896_1_p1;Ancoracysta_twista|GFYU01031877_1_p1;Hemimastix_kukwesjijk|EP00696_Hemimastix_kukwesjijk_P006574;Meteora_sporadica|NODE_10198_length_662_cov_108_753744_g8526_i0;Meteora_sporadica|NODE_10480_length_628_cov_85_629630_g8786_i0;Meteora_sporadica|NODE_1090…
cluster376	GO:0004674; F:protein serine/threonine kinase activity; IEA:UniProtKB-KW	30	Q6QNM1	Ancoracysta_twista|GFYU01000966_1_p1;Ancoracysta_twista|GFYU01001860_1_p1;Ancoracysta_twista|GFYU01003167_1_p1;Ancoracysta_twista|GFYU01011942_1_p1;Hemimastix_kukwesjijk|EP00696_Hemimastix_kukwesjijk_P005304;Hemimastix_kukwesjijk|EP00696_Hemimastix_kukwesjijk_P008210;Hemimastix_kukwesjijk|EP00696_Hemimastix_kukwesjijk_P012383;Meteora_sporadica|NODE_6067_length_1325_cov_338_612342_g4959_i0;Nebulom…
cluster377	GO:0046900; P:tetrahydrofolylpolyglutamate metabolic process; IBA:GO_Central	30	Q54LN4	Ancoracysta_twista|GFYU01001111_1_p2;Ancoracysta_twista|GFYU01003074_1_p1;Ancoracysta_twista|GFYU01007073_1_p1;Hemimastix_kukwesjijk|EP00696_Hemimastix_kukwesjijk_P000382;Hemimastix_kukwesjijk|EP00696_Hemimastix_kukwesjijk_P009739;Hemimastix_kukwesjijk|EP00696_Hemimastix_kukwesjijk_P015484;Hemimastix_kukwesjijk|EP00696_Hemimastix_kukwesjijk_P015495;Meteora_sporadica|NODE_3725_length_1932_cov_73_9…
cluster378	GO:0006508; P:proteolysis; IBA:GO_Central	30	Q1PF50	Ancoracysta_twista|GFYU01002917_1_p1;Ancoracysta_twista|GFYU01003560_1_p1;Ancoracysta_twista|GFYU01006072_1_p1;Ancoracysta_twista|GFYU01008166_1_p1;Ancoracysta_twista|GFYU01010112_1_p1;Ancoracysta_twista|GFYU01013989_1_p1;Ancoracysta_twista|GFYU01015000_1_p2;Hemimastix_kukwesjijk|EP00696_Hemimastix_kukwesjijk_P015393;Hemimastix_kukwesjijk|EP00696_Hemimastix_kukwesjijk_P015397;Hemimastix_kukwesjij…
cluster384	GO:0007608; P:sensory perception of smell; IEA:UniProtKB-KW	30	B2RFN2	Ancoracysta_twista|GFYU01009262_1_p1;Ancoracysta_twista|GFYU01041373_1_p1;Ancoracysta_twista|GFYU01051563_1_p1;Hemimastix_kukwesjijk|EP00696_Hemimastix_kukwesjijk_P019009;Hemimastix_kukwesjijk|EP00696_Hemimastix_kukwesjijk_P019010;Hemimastix_kukwesjijk|EP00696_Hemimastix_kukwesjijk_P020336;Hemimastix_kukwesjijk|EP00696_Hemimastix_kukwesjijk_P020350;Meteora_sporadica|NODE_1668_length_3030_cov_315_…
cluster386	GO:0006631; P:fatty acid metabolic process; IEA:UniProtKB-KW	30	Q4I8Q4	Ancoracysta_twista|GFYU01019417_1_p1;Hemimastix_kukwesjijk|EP00696_Hemimastix_kukwesjijk_P007617;Hemimastix_kukwesjijk|EP00696_Hemimastix_kukwesjijk_P010334;Meteora_sporadica|NODE_8555_length_891_cov_27_293976_g7066_i0;Nebulomonas_marisrubri|TRINITY_DN8491_c0_g1_TRINITY_DN8491_c0_g1_i1_g_12737_m_12737;Nebulomonas_marisrubri|TRINITY_DN8491_c0_g1_TRINITY_DN8491_c0_g1_i2_g_12738_m_12738;Nebulomonas_…
cluster392	N/A	29	N/A	Ancoracysta_twista|GFYU01000399_1_p1;Ancoracysta_twista|GFYU01000816_1_p1;Ancoracysta_twista|GFYU01001297_1_p2;Ancoracysta_twista|GFYU01001306_1_p1;Ancoracysta_twista|GFYU01002301_1_p1;Ancoracysta_twista|GFYU01007929_1_p1;Ancoracysta_twista|GFYU01031141_1_p1;Hemimastix_kukwesjijk|EP00696_Hemimastix_kukwesjijk_P008818;Hemimastix_kukwesjijk|EP00696_Hemimastix_kukwesjijk_P017074;Meteora_sporadica|NO…
cluster393	GO:0009636; P:response to toxic substance; IMP:SGD	29	Q12442	Ancoracysta_twista|GFYU01000613_1_p1;Ancoracysta_twista|GFYU01001611_1_p1;Ancoracysta_twista|GFYU01003521_1_p1;Hemimastix_kukwesjijk|EP00696_Hemimastix_kukwesjijk_P011541;Meteora_sporadica|NODE_6120_length_1315_cov_37_862839_g5004_i0;Meteora_sporadica|NODE_7122_length_1130_cov_163_404116_g5847_i0;Nebulomonas_marisrubri|TRINITY_DN10016_c0_g1_TRINITY_DN10016_c0_g1_i1_g_80756_m_80756;Nebulomonas_mar…
cluster394	GO:0003746; F:translation elongation factor activity; IEA:UniProtKB-KW	29	Q6FYA7	Ancoracysta_twista|GFYU01000737_1_p1;Ancoracysta_twista|GFYU01001320_1_p1;Hemimastix_kukwesjijk|EP00696_Hemimastix_kukwesjijk_P004722;Hemimastix_kukwesjijk|EP00696_Hemimastix_kukwesjijk_P005875;Meteora_sporadica|NODE_2013_length_2797_cov_1875_892544_g1638_i0;Meteora_sporadica|NODE_2031_length_2788_cov_89_466813_g1654_i0;Meteora_sporadica|NODE_2155_length_2691_cov_17_448289_g1751_i0;Meteora_sporad…
cluster396	GO:0006555; P:methionine metabolic process; IBA:GO_Central	29	Q54ER6	Ancoracysta_twista|GFYU01001346_1_p1;Ancoracysta_twista|GFYU01004543_1_p1;Ancoracysta_twista|GFYU01011089_1_p1;Ancoracysta_twista|GFYU01027444_1_p1;Ancoracysta_twista|GFYU01045160_1_p1;Hemimastix_kukwesjijk|EP00696_Hemimastix_kukwesjijk_P000192;Hemimastix_kukwesjijk|EP00696_Hemimastix_kukwesjijk_P008575;Hemimastix_kukwesjijk|EP00696_Hemimastix_kukwesjijk_P008605;Hemimastix_kukwesjijk|EP00696_Hemi…
cluster397	GO:0009407; P:toxin catabolic process; TAS:TAIR	29	P42761	Ancoracysta_twista|GFYU01001553_1_p1;Ancoracysta_twista|GFYU01014477_1_p1;Ancoracysta_twista|GFYU01040225_1_p1;Hemimastix_kukwesjijk|EP00696_Hemimastix_kukwesjijk_P004166;Hemimastix_kukwesjijk|EP00696_Hemimastix_kukwesjijk_P009166;Hemimastix_kukwesjijk|EP00696_Hemimastix_kukwesjijk_P014338;Meteora_sporadica|NODE_11617_length_495_cov_560_023041_g9862_i0;Meteora_sporadica|NODE_6845_length_1182_cov_…
cluster399	GO:0006508; P:proteolysis; IBA:GO_Central	29	O80983	Ancoracysta_twista|GFYU01004365_1_p1;Ancoracysta_twista|GFYU01009321_1_p1;Ancoracysta_twista|GFYU01015281_1_p1;Ancoracysta_twista|GFYU01019976_1_p1;Ancoracysta_twista|GFYU01023596_1_p1;Ancoracysta_twista|GFYU01065630_1_p1;Ancoracysta_twista|GFYU01072287_1_p1;Hemimastix_kukwesjijk|EP00696_Hemimastix_kukwesjijk_P016457;Hemimastix_kukwesjijk|EP00696_Hemimastix_kukwesjijk_P018479;Meteora_sporadica|NO…
cluster400	GO:0006396; P:RNA processing; IEA:InterPro	29	Q4R627	Ancoracysta_twista|GFYU01004765_1_p1;Ancoracysta_twista|GFYU01053526_1_p1;Hemimastix_kukwesjijk|EP00696_Hemimastix_kukwesjijk_P002798;Meteora_sporadica|NODE_5024_length_1549_cov_17_037634_g4067_i0;Meteora_sporadica|NODE_7999_length_983_cov_12_257050_g6584_i0;Nebulomonas_marisrubri|TRINITY_DN20653_c0_g1_TRINITY_DN20653_c0_g1_i1_g_58517_m_58517;Nebulomonas_marisrubri|TRINITY_DN5300_c0_g1_TRINITY_DN…
cluster401	GO:0036459; F:thiol-dependent ubiquitinyl hydrolase activity; IEA:UniProtKB-EC	29	Q5ZIV7	Ancoracysta_twista|GFYU01004857_1_p1;Ancoracysta_twista|GFYU01009790_1_p1;Ancoracysta_twista|GFYU01028682_1_p1;Ancoracysta_twista|GFYU01045494_1_p1;Hemimastix_kukwesjijk|EP00696_Hemimastix_kukwesjijk_P018730;Meteora_sporadica|NODE_9517_length_747_cov_47_005831_g7915_i0;Nebulomonas_marisrubri|TRINITY_DN34494_c0_g1_TRINITY_DN34494_c0_g1_i1_g_28879_m_28879;Nebulomonas_marisrubri|TRINITY_DN5254_c0_g1…
cluster404	GO:0008610; P:lipid biosynthetic process; IEA:InterPro	29	B8BIM2	Ancoracysta_twista|GFYU01005819_1_p1;Ancoracysta_twista|GFYU01012688_1_p1;Hemimastix_kukwesjijk|EP00696_Hemimastix_kukwesjijk_P003043;Hemimastix_kukwesjijk|EP00696_Hemimastix_kukwesjijk_P011174;Meteora_sporadica|NODE_8244_length_941_cov_49_702273_g6797_i0;Meteora_sporadica|NODE_8321_length_929_cov_143_581797_g6865_i0;Meteora_sporadica|NODE_8349_length_925_cov_11_405093_g6890_i0;Meteora_sporadica|…
cluster408	GO:0006401; P:RNA catabolic process; IBA:GO_Central	29	F4JAA5	Ancoracysta_twista|GFYU01010227_1_p1;Ancoracysta_twista|GFYU01030801_1_p1;Ancoracysta_twista|GFYU01067023_1_p1;Ancoracysta_twista|GFYU01068161_1_p1;Ancoracysta_twista|GFYU01071036_1_p1;Hemimastix_kukwesjijk|EP00696_Hemimastix_kukwesjijk_P014865;Meteora_sporadica|NODE_12641_length_399_cov_4_076923_g10878_i0;Meteora_sporadica|NODE_1775_length_2952_cov_3_546870_g1451_i0;Meteora_sporadica|NODE_3467_l…
cluster410	GO:0006417; P:regulation of translation; IEA:UniProtKB-KW	29	Q5BJ41	Ancoracysta_twista|GFYU01011122_1_p1;Ancoracysta_twista|GFYU01011422_1_p1;Ancoracysta_twista|GFYU01024590_1_p1;Hemimastix_kukwesjijk|EP00696_Hemimastix_kukwesjijk_P005550;Meteora_sporadica|NODE_11559_length_502_cov_2_201814_g9806_i0;Meteora_sporadica|NODE_3236_length_2118_cov_182_826446_g2622_i0;Nebulomonas_marisrubri|TRINITY_DN11557_c0_g1_TRINITY_DN11557_c0_g1_i3_g_10028_m_10028;Nebulomonas_mari…
cluster412	GO:0006099; P:tricarboxylic acid cycle; IEA:UniProtKB-KW	29	Q8BMF4	Ancoracysta_twista|GFYU01015836_1_p1;Ancoracysta_twista|GFYU01038980_1_p1;Hemimastix_kukwesjijk|EP00696_Hemimastix_kukwesjijk_P000082;Hemimastix_kukwesjijk|EP00696_Hemimastix_kukwesjijk_P014653;Hemimastix_kukwesjijk|EP00696_Hemimastix_kukwesjijk_P014654;Hemimastix_kukwesjijk|EP00696_Hemimastix_kukwesjijk_P019292;Meteora_sporadica|NODE_5409_length_1461_cov_9_785000_g4394_i0;Meteora_sporadica|NODE_…
cluster426	GO:0006998; P:nuclear envelope organization; ISS:UniProtKB	28	Q5BL63	Ancoracysta_twista|GFYU01000267_1_p2;Ancoracysta_twista|GFYU01000929_1_p2;Ancoracysta_twista|GFYU01000996_1_p1;Hemimastix_kukwesjijk|EP00696_Hemimastix_kukwesjijk_P000191;Hemimastix_kukwesjijk|EP00696_Hemimastix_kukwesjijk_P006599;Hemimastix_kukwesjijk|EP00696_Hemimastix_kukwesjijk_P016201;Meteora_sporadica|NODE_10727_length_594_cov_262_542214_g9014_i0;Meteora_sporadica|NODE_11433_length_515_cov_…
cluster429	GO:0007165; P:signal transduction; IEA:InterPro	28	P34729	Ancoracysta_twista|GFYU01001408_1_p1;Ancoracysta_twista|GFYU01009039_1_p1;Ancoracysta_twista|GFYU01009462_1_p1;Ancoracysta_twista|GFYU01017417_1_p1;Ancoracysta_twista|GFYU01035922_1_p2;Hemimastix_kukwesjijk|EP00696_Hemimastix_kukwesjijk_P011356;Meteora_sporadica|NODE_6278_length_1289_cov_454_899023_g5141_i0;Meteora_sporadica|NODE_9715_length_724_cov_1296_319759_g8088_i0;Nebulomonas_marisrubri|TRI…
cluster430	GO:0002931; P:response to ischemia; ISS:ParkinsonsUK-UCL	28	Q9Y4L1	Ancoracysta_twista|GFYU01002000_1_p2;Ancoracysta_twista|GFYU01003161_1_p1;Ancoracysta_twista|GFYU01011500_1_p1;Ancoracysta_twista|GFYU01052251_1_p1;Hemimastix_kukwesjijk|EP00696_Hemimastix_kukwesjijk_P001621;Hemimastix_kukwesjijk|EP00696_Hemimastix_kukwesjijk_P004212;Meteora_sporadica|NODE_1453_length_3230_cov_13_736825_g1190_i0;Meteora_sporadica|NODE_2113_length_2725_cov_84_309685_g1718_i0;Nebul…
cluster431	GO:0016567; P:protein ubiquitination; IBA:GO_Central	28	Q55C16	Ancoracysta_twista|GFYU01002025_1_p1;Ancoracysta_twista|GFYU01002310_1_p1;Ancoracysta_twista|GFYU01008655_1_p1;Hemimastix_kukwesjijk|EP00696_Hemimastix_kukwesjijk_P002147;Hemimastix_kukwesjijk|EP00696_Hemimastix_kukwesjijk_P003647;Hemimastix_kukwesjijk|EP00696_Hemimastix_kukwesjijk_P004620;Hemimastix_kukwesjijk|EP00696_Hemimastix_kukwesjijk_P009229;Meteora_sporadica|NODE_1499_length_3185_cov_34_9…
cluster433	GO:0051014; P:actin filament severing; IDA:dictyBase	28	P10733	Ancoracysta_twista|GFYU01004318_1_p1;Hemimastix_kukwesjijk|EP00696_Hemimastix_kukwesjijk_P018087;Meteora_sporadica|NODE_1142_length_3608_cov_1510_160135_g929_i0;Meteora_sporadica|NODE_1234_length_3497_cov_66_413271_g1008_i0;Meteora_sporadica|NODE_1271_length_3450_cov_63_811449_g1008_i1;Meteora_sporadica|NODE_1308_length_3399_cov_1686_688436_g929_i1;Meteora_sporadica|NODE_466_length_5222_cov_35_97…
cluster438	GO:0004104; F:cholinesterase activity; ISS:UniProtKB	28	O62761	Ancoracysta_twista|GFYU01006332_1_p1;Ancoracysta_twista|GFYU01010289_1_p2;Ancoracysta_twista|GFYU01057683_1_p1;Hemimastix_kukwesjijk|EP00696_Hemimastix_kukwesjijk_P016032;Meteora_sporadica|NODE_10951_length_571_cov_3_256863_g9225_i0;Meteora_sporadica|NODE_1751_length_2970_cov_29_958061_g1431_i0;Meteora_sporadica|NODE_3106_length_2170_cov_21_870081_g2518_i0;Meteora_sporadica|NODE_3463_length_2032_…
cluster441	GO:0009723; P:response to ethylene; IMP:TAIR	28	Q9S7J8	Ancoracysta_twista|GFYU01007732_1_p1;Ancoracysta_twista|GFYU01021732_1_p1;Hemimastix_kukwesjijk|EP00696_Hemimastix_kukwesjijk_P013620;Hemimastix_kukwesjijk|EP00696_Hemimastix_kukwesjijk_P013621;Meteora_sporadica|NODE_10668_length_604_cov_12_441989_g8960_i0;Meteora_sporadica|NODE_769_length_4240_cov_12_546303_g629_i0;Nebulomonas_marisrubri|TRINITY_DN13843_c1_g1_TRINITY_DN13843_c1_g1_i11_g_95945_m_…
cluster444	GO:0043484; P:regulation of RNA splicing; IMP:UniProtKB	28	Q8C9F5	Ancoracysta_twista|GFYU01011053_1_p2;Hemimastix_kukwesjijk|EP00696_Hemimastix_kukwesjijk_P010992;Hemimastix_kukwesjijk|EP00696_Hemimastix_kukwesjijk_P012214;Meteora_sporadica|NODE_4413_length_1708_cov_3_863388_g3575_i0;Meteora_sporadica|NODE_4496_length_1684_cov_23_488601_g3646_i0;Meteora_sporadica|NODE_961_length_3887_cov_45_136174_g784_i0;Nebulomonas_marisrubri|TRINITY_DN320_c0_g1_TRINITY_DN320…
cluster446	GO:0006869; P:lipid transport; IEA:UniProtKB-KW	28	Q4R559	Ancoracysta_twista|GFYU01011821_1_p2;Ancoracysta_twista|GFYU01023368_1_p1;Hemimastix_kukwesjijk|EP00696_Hemimastix_kukwesjijk_P009399;Hemimastix_kukwesjijk|EP00696_Hemimastix_kukwesjijk_P009846;Hemimastix_kukwesjijk|EP00696_Hemimastix_kukwesjijk_P013593;Meteora_sporadica|NODE_5514_length_1437_cov_92_343023_g4481_i0;Meteora_sporadica|NODE_5838_length_1369_cov_9_993119_g4762_i0;Nebulomonas_marisrub…
cluster449	GO:0007165; P:signal transduction; IEA:InterPro	28	Q54E35	Ancoracysta_twista|GFYU01017022_1_p1;Ancoracysta_twista|GFYU01024700_1_p1;Ancoracysta_twista|GFYU01051529_1_p1;Ancoracysta_twista|GFYU01051976_1_p1;Ancoracysta_twista|GFYU01057276_1_p1;Ancoracysta_twista|GFYU01066072_1_p1;Ancoracysta_twista|GFYU01079261_1_p1;Ancoracysta_twista|GFYU01082694_1_p1;Ancoracysta_twista|GFYU01088557_1_p1;Hemimastix_kukwesjijk|EP00696_Hemimastix_kukwesjijk_P005129;Meteor…
cluster450	GO:0021510; P:spinal cord development; IEA:Ensembl	28	Q9UKA9	Ancoracysta_twista|GFYU01020852_1_p1;Ancoracysta_twista|GFYU01024645_1_p1;Hemimastix_kukwesjijk|EP00696_Hemimastix_kukwesjijk_P013075;Hemimastix_kukwesjijk|EP00696_Hemimastix_kukwesjijk_P013076;Hemimastix_kukwesjijk|EP00696_Hemimastix_kukwesjijk_P013077;Meteora_sporadica|NODE_3867_length_1884_cov_48_778936_g3137_i0;Nebulomonas_marisrubri|TRINITY_DN13619_c3_g1_TRINITY_DN13619_c3_g1_i3_g_57029_m_57…
cluster451	GO:0055085; P:transmembrane transport; IEA:InterPro	28	Q28FF3	Ancoracysta_twista|GFYU01021494_1_p1;Ancoracysta_twista|GFYU01063111_1_p1;Ancoracysta_twista|GFYU01082952_1_p1;Hemimastix_kukwesjijk|EP00696_Hemimastix_kukwesjijk_P000636;Meteora_sporadica|NODE_5264_length_1492_cov_4_060797_g4270_i0;Meteora_sporadica|NODE_5721_length_1392_cov_29_274981_g4660_i0;Meteora_sporadica|NODE_6446_length_1261_cov_2_849167_g5284_i0;Meteora_sporadica|NODE_8535_length_895_co…
cluster459	GO:0045454; P:cell redox homeostasis; IEA:InterPro	27	Q67UF5	Ancoracysta_twista|GFYU01001064_1_p1;Ancoracysta_twista|GFYU01003683_1_p1;Ancoracysta_twista|GFYU01003996_1_p1;Ancoracysta_twista|GFYU01005005_1_p1;Ancoracysta_twista|GFYU01005076_1_p1;Hemimastix_kukwesjijk|EP00696_Hemimastix_kukwesjijk_P014820;Meteora_sporadica|NODE_3163_length_2145_cov_53_823417_g2565_i0;Nebulomonas_marisrubri|TRINITY_DN12472_c0_g1_TRINITY_DN12472_c0_g1_i1_g_36821_m_36821;Nebul…
cluster466	GO:0005886; C:plasma membrane; IEA:UniProtKB-SubCell	27	P9WLC6	Ancoracysta_twista|GFYU01002462_1_p1;Ancoracysta_twista|GFYU01008184_1_p1;Hemimastix_kukwesjijk|EP00696_Hemimastix_kukwesjijk_P001735;Meteora_sporadica|NODE_5504_length_1439_cov_34_351234_g4472_i0;Meteora_sporadica|NODE_9924_length_697_cov_25_853774_g4472_i1;Nebulomonas_marisrubri|TRINITY_DN4712_c0_g1_TRINITY_DN4712_c0_g1_i1_g_49980_m_49980;Nebulomonas_marisrubri|TRINITY_DN5694_c0_g1_TRINITY_DN56…
cluster469	GO:0006865; P:amino acid transport; IEA:UniProtKB-KW	27	Q9SHH0	Ancoracysta_twista|GFYU01003832_1_p2;Ancoracysta_twista|GFYU01004984_1_p1;Ancoracysta_twista|GFYU01016822_1_p1;Ancoracysta_twista|GFYU01034452_1_p1;Ancoracysta_twista|GFYU01043796_1_p1;Hemimastix_kukwesjijk|EP00696_Hemimastix_kukwesjijk_P011453;Meteora_sporadica|NODE_3758_length_1921_cov_18_918280_g3052_i0;Meteora_sporadica|NODE_4042_length_1817_cov_11_269362_g3277_i0;Meteora_sporadica|NODE_4080_…
cluster484	GO:0019953; P:sexual reproduction; IEP:dictyBase	26	Q54EN4	Ancoracysta_twista|GFYU01000324_1_p1;Ancoracysta_twista|GFYU01003423_1_p1;Ancoracysta_twista|GFYU01027131_1_p1;Hemimastix_kukwesjijk|EP00696_Hemimastix_kukwesjijk_P012577;Meteora_sporadica|NODE_5035_length_1546_cov_1068_101684_g4077_i0;Nebulomonas_marisrubri|TRINITY_DN13680_c3_g2_TRINITY_DN13680_c3_g2_i2_g_57569_m_57569;Nebulomonas_marisrubri|TRINITY_DN13680_c3_g2_TRINITY_DN13680_c3_g2_i3_g_57582…
cluster487	GO:0006388; P:tRNA splicing, via endonucleolytic cleavage and ligation; IDA:MGI	26	Q8K3A2	Ancoracysta_twista|GFYU01001021_1_p1;Ancoracysta_twista|GFYU01001150_1_p1;Ancoracysta_twista|GFYU01001164_1_p1;Ancoracysta_twista|GFYU01007295_1_p1;Ancoracysta_twista|GFYU01054525_1_p1;Hemimastix_kukwesjijk|EP00696_Hemimastix_kukwesjijk_P002156;Hemimastix_kukwesjijk|EP00696_Hemimastix_kukwesjijk_P017277;Meteora_sporadica|NODE_10620_length_611_cov_2_541818_g8913_i0;Meteora_sporadica|NODE_9565_leng…
cluster488	GO:0006646; P:phosphatidylethanolamine biosynthetic process; ISS:dictyBase	26	Q55BZ4	Ancoracysta_twista|GFYU01001208_1_p1;Hemimastix_kukwesjijk|EP00696_Hemimastix_kukwesjijk_P008967;Hemimastix_kukwesjijk|EP00696_Hemimastix_kukwesjijk_P014568;Meteora_sporadica|NODE_6648_length_1222_cov_19_621878_g5454_i0;Nebulomonas_marisrubri|TRINITY_DN11109_c0_g1_TRINITY_DN11109_c0_g1_i1_g_66716_m_66716;Nebulomonas_marisrubri|TRINITY_DN12882_c0_g1_TRINITY_DN12882_c0_g1_i1_g_6145_m_6145;Nibblerom…
cluster490	GO:0019953; P:sexual reproduction; IEP:dictyBase	26	P54680	Ancoracysta_twista|GFYU01002191_1_p1;Hemimastix_kukwesjijk|EP00696_Hemimastix_kukwesjijk_P003759;Meteora_sporadica|NODE_1122_length_3636_cov_112_008951_g913_i0;Meteora_sporadica|NODE_1904_length_2859_cov_239_225161_g1552_i0;Meteora_sporadica|NODE_2949_length_2244_cov_278_044892_g1552_i1;Meteora_sporadica|NODE_3316_length_2083_cov_714_159248_g2685_i0;Meteora_sporadica|NODE_3371_length_2064_cov_760…
cluster492	GO:0048169; P:regulation of long-term neuronal synaptic plasticity; IBA:GO_Central	26	Q0IIG7	Ancoracysta_twista|GFYU01002690_1_p1;Ancoracysta_twista|GFYU01006114_1_p1;Hemimastix_kukwesjijk|EP00696_Hemimastix_kukwesjijk_P014918;Meteora_sporadica|NODE_9158_length_796_cov_435_114286_g5223_i1;Meteora_sporadica|NODE_9373_length_766_cov_117_402837_g7783_i0;Nebulomonas_marisrubri|TRINITY_DN13848_c0_g1_TRINITY_DN13848_c0_g1_i1_g_97595_m_97595;Nebulomonas_marisrubri|TRINITY_DN13848_c0_g1_TRINITY_…
cluster496	GO:0016491; F:oxidoreductase activity; IEA:UniProtKB-KW	26	Q49WS9	Ancoracysta_twista|GFYU01003876_1_p1;Ancoracysta_twista|GFYU01021389_1_p1;Ancoracysta_twista|GFYU01021625_1_p1;Ancoracysta_twista|GFYU01058936_1_p2;Ancoracysta_twista|GFYU01088907_1_p1;Hemimastix_kukwesjijk|EP00696_Hemimastix_kukwesjijk_P008823;Hemimastix_kukwesjijk|EP00696_Hemimastix_kukwesjijk_P011733;Hemimastix_kukwesjijk|EP00696_Hemimastix_kukwesjijk_P014175;Meteora_sporadica|NODE_8743_length…
cluster507	GO:0045908; P:negative regulation of vasodilation; IMP:RGD	26	P97612	Ancoracysta_twista|GFYU01013084_1_p1;Ancoracysta_twista|GFYU01028905_1_p1;Ancoracysta_twista|GFYU01058874_1_p1;Hemimastix_kukwesjijk|EP00696_Hemimastix_kukwesjijk_P013345;Meteora_sporadica|NODE_1421_length_3259_cov_11_676360_g1163_i0;Meteora_sporadica|NODE_5392_length_1465_cov_5_841880_g4378_i0;Nebulomonas_marisrubri|TRINITY_DN10804_c0_g1_TRINITY_DN10804_c0_g1_i1_g_19099_m_19099;Nebulomonas_maris…
cluster519	GO:0006457; P:protein folding; IEA:InterPro	25	P36183	Ancoracysta_twista|GFYU01000002_1_p1;Ancoracysta_twista|GFYU01000900_1_p1;Ancoracysta_twista|GFYU01003544_1_p1;Hemimastix_kukwesjijk|EP00696_Hemimastix_kukwesjijk_P015975;Hemimastix_kukwesjijk|EP00696_Hemimastix_kukwesjijk_P019413;Hemimastix_kukwesjijk|EP00696_Hemimastix_kukwesjijk_P020038;Meteora_sporadica|NODE_2394_length_2546_cov_83_273239_g1943_i0;Meteora_sporadica|NODE_3004_length_2217_cov_1…
cluster520	GO:0006511; P:ubiquitin-dependent protein catabolic process; IEA:InterPro	25	Q9Y4E8	Ancoracysta_twista|GFYU01000183_1_p1;Hemimastix_kukwesjijk|EP00696_Hemimastix_kukwesjijk_P002536;Hemimastix_kukwesjijk|EP00696_Hemimastix_kukwesjijk_P010071;Meteora_sporadica|NODE_1672_length_3027_cov_15_871544_g1369_i0;Nebulomonas_marisrubri|TRINITY_DN13443_c0_g1_TRINITY_DN13443_c0_g1_i2_g_82085_m_82085;Nibbleromonas_arcticus|TRINITY_DN17269_c0_g1_TRINITY_DN17269_c0_g1_i1_g_12075_m_12075;Nibbler…
cluster523	GO:0034214; P:protein hexamerization; ISS:UniProtKB	25	Q3ZCF5	Ancoracysta_twista|GFYU01001255_1_p1;Ancoracysta_twista|GFYU01012037_1_p3;Ancoracysta_twista|GFYU01028698_1_p2;Ancoracysta_twista|GFYU01060287_1_p1;Ancoracysta_twista|GFYU01068969_1_p3;Ancoracysta_twista|GFYU01081476_1_p2;Hemimastix_kukwesjijk|EP00696_Hemimastix_kukwesjijk_P008276;Hemimastix_kukwesjijk|EP00696_Hemimastix_kukwesjijk_P018807;Meteora_sporadica|NODE_4808_length_1603_cov_90_957847_g38…
cluster525	GO:0006511; P:ubiquitin-dependent protein catabolic process; IBA:GO_Central	25	P38285	Ancoracysta_twista|GFYU01002544_1_p1;Ancoracysta_twista|GFYU01005460_1_p1;Ancoracysta_twista|GFYU01037936_1_p1;Ancoracysta_twista|GFYU01058529_1_p1;Hemimastix_kukwesjijk|EP00696_Hemimastix_kukwesjijk_P002081;Hemimastix_kukwesjijk|EP00696_Hemimastix_kukwesjijk_P018641;Meteora_sporadica|NODE_8298_length_932_cov_127_185993_g6844_i0;Meteora_sporadica|NODE_9244_length_783_cov_164_691136_g6844_i1;Nebul…
cluster529	GO:0006486; P:protein glycosylation; IEA:UniProtKB-UniPathway	25	Q9C512	Ancoracysta_twista|GFYU01003736_1_p1;Ancoracysta_twista|GFYU01070975_1_p1;Hemimastix_kukwesjijk|EP00696_Hemimastix_kukwesjijk_P000742;Meteora_sporadica|NODE_2413_length_2533_cov_24_486246_g1956_i0;Meteora_sporadica|NODE_4811_length_1603_cov_16_920882_g3896_i0;Nebulomonas_marisrubri|TRINITY_DN11991_c0_g1_TRINITY_DN11991_c0_g1_i1_g_15800_m_15800;Nebulomonas_marisrubri|TRINITY_DN7918_c0_g1_TRINITY_D…
cluster533	GO:0030150; P:protein import into mitochondrial matrix; IBA:GO_Central	25	Q9SP35	Ancoracysta_twista|GFYU01008472_1_p1;Ancoracysta_twista|GFYU01008863_1_p1;Ancoracysta_twista|GFYU01033936_1_p1;Hemimastix_kukwesjijk|EP00696_Hemimastix_kukwesjijk_P008558;Meteora_sporadica|NODE_9363_length_767_cov_37_012748_g7774_i0;Meteora_sporadica|NODE_9481_length_753_cov_28_213873_g7883_i0;Nebulomonas_marisrubri|TRINITY_DN5106_c0_g1_TRINITY_DN5106_c0_g1_i2_g_73243_m_73243;Nibbleromonas_arctic…
cluster534	GO:0006164; P:purine nucleotide biosynthetic process; IBA:GO_Central	25	Q8S2E5	Ancoracysta_twista|GFYU01010331_1_p1;Ancoracysta_twista|GFYU01012333_1_p1;Ancoracysta_twista|GFYU01080277_1_p1;Hemimastix_kukwesjijk|EP00696_Hemimastix_kukwesjijk_P010416;Hemimastix_kukwesjijk|EP00696_Hemimastix_kukwesjijk_P017987;Hemimastix_kukwesjijk|EP00696_Hemimastix_kukwesjijk_P019188;Meteora_sporadica|NODE_7643_length_1040_cov_46_818182_g6284_i0;Nebulomonas_marisrubri|TRINITY_DN11772_c0_g1_…
cluster535	N/A	25	Q6NRK9	Ancoracysta_twista|GFYU01012010_1_p1;Ancoracysta_twista|GFYU01012181_1_p1;Ancoracysta_twista|GFYU01053566_1_p1;Hemimastix_kukwesjijk|EP00696_Hemimastix_kukwesjijk_P002719;Hemimastix_kukwesjijk|EP00696_Hemimastix_kukwesjijk_P016473;Meteora_sporadica|NODE_4759_length_1616_cov_8_598071_g3856_i0;Meteora_sporadica|NODE_5089_length_1535_cov_8_261872_g4128_i0;Meteora_sporadica|NODE_6729_length_1206_cov_…
cluster536	GO:0050821; P:protein stabilization; ISS:HGNC	25	Q3UB74	Ancoracysta_twista|GFYU01012514_1_p1;Ancoracysta_twista|GFYU01089978_1_p1;Hemimastix_kukwesjijk|EP00696_Hemimastix_kukwesjijk_P014825;Meteora_sporadica|NODE_1924_length_2849_cov_30_800215_g1569_i0;Meteora_sporadica|NODE_6740_length_1203_cov_20_697023_g5527_i0;Meteora_sporadica|NODE_9161_length_796_cov_7_658503_g7594_i0;Nebulomonas_marisrubri|TRINITY_DN11468_c0_g1_TRINITY_DN11468_c0_g1_i1_g_26800_…
cluster548	GO:0003723; F:RNA binding; IEA:UniProtKB-KW	25	P24346	Ancoracysta_twista|GFYU01052617_1_p1;Ancoracysta_twista|GFYU01054739_1_p1;Hemimastix_kukwesjijk|EP00696_Hemimastix_kukwesjijk_P019577;Meteora_sporadica|NODE_3417_length_2046_cov_50_606549_g2761_i0;Nebulomonas_marisrubri|TRINITY_DN11570_c0_g1_TRINITY_DN11570_c0_g1_i1_g_9833_m_9833;Nebulomonas_marisrubri|TRINITY_DN13718_c2_g5_TRINITY_DN13718_c2_g5_i2_g_46739_m_46739;Nibbleromonas_arcticus|TRINITY_D…
cluster549	GO:0006020; P:inositol metabolic process; ISS:UniProtKB	25	Q5XHF8	Ancoracysta_twista|GFYU01053709_1_p1;Hemimastix_kukwesjijk|EP00696_Hemimastix_kukwesjijk_P005563;Hemimastix_kukwesjijk|EP00696_Hemimastix_kukwesjijk_P010946;Hemimastix_kukwesjijk|EP00696_Hemimastix_kukwesjijk_P010947;Meteora_sporadica|NODE_7031_length_1146_cov_18_974194_g5775_i0;Nebulomonas_marisrubri|TRINITY_DN12860_c0_g1_TRINITY_DN12860_c0_g1_i2_g_5737_m_5737;Nebulomonas_marisrubri|TRINITY_DN29…
cluster561	N/A	24	N/A	Ancoracysta_twista|GFYU01000659_1_p1;Ancoracysta_twista|GFYU01006696_1_p1;Ancoracysta_twista|GFYU01011238_1_p1;Ancoracysta_twista|GFYU01015018_1_p1;Hemimastix_kukwesjijk|EP00696_Hemimastix_kukwesjijk_P001728;Hemimastix_kukwesjijk|EP00696_Hemimastix_kukwesjijk_P016103;Meteora_sporadica|NODE_10948_length_571_cov_66_211765_g9222_i0;Meteora_sporadica|NODE_11390_length_520_cov_19_176471_g9640_i0;Nebul…
cluster562	GO:0016192; P:vesicle-mediated transport; IEA:InterPro	24	Q8VD57	Ancoracysta_twista|GFYU01000744_1_p1;Ancoracysta_twista|GFYU01003452_1_p1;Hemimastix_kukwesjijk|EP00696_Hemimastix_kukwesjijk_P003642;Hemimastix_kukwesjijk|EP00696_Hemimastix_kukwesjijk_P009883;Hemimastix_kukwesjijk|EP00696_Hemimastix_kukwesjijk_P009884;Meteora_sporadica|NODE_10621_length_610_cov_166_996357_g8914_i0;Nebulomonas_marisrubri|TRINITY_DN16839_c0_g1_TRINITY_DN16839_c0_g1_i1_g_73549_m_7…
cluster563	GO:0006417; P:regulation of translation; IEA:UniProtKB-KW	24	Q9YGP6	Ancoracysta_twista|GFYU01000833_1_p1;Ancoracysta_twista|GFYU01006774_1_p1;Ancoracysta_twista|GFYU01017531_1_p1;Ancoracysta_twista|GFYU01059923_1_p1;Ancoracysta_twista|GFYU01069427_1_p1;Hemimastix_kukwesjijk|EP00696_Hemimastix_kukwesjijk_P012408;Meteora_sporadica|NODE_10579_length_616_cov_13_585586_g8875_i0;Nebulomonas_marisrubri|TRINITY_DN11354_c1_g1_TRINITY_DN11354_c1_g1_i1_g_38845_m_38845;Nebul…
cluster565	GO:0005773; C:vacuole; IDA:TAIR	24	Q9LK25	Ancoracysta_twista|GFYU01001029_1_p1;Ancoracysta_twista|GFYU01001690_1_p2;Hemimastix_kukwesjijk|EP00696_Hemimastix_kukwesjijk_P010753;Hemimastix_kukwesjijk|EP00696_Hemimastix_kukwesjijk_P011919;Meteora_sporadica|NODE_7467_length_1074_cov_63_357354_g6133_i0;Meteora_sporadica|NODE_8272_length_935_cov_46_705950_g6821_i0;Nebulomonas_marisrubri|TRINITY_DN11274_c0_g1_TRINITY_DN11274_c0_g1_i1_g_62915_m_…
cluster567	GO:0009617; P:response to bacterium; HEP:dictyBase	24	P34118	Ancoracysta_twista|GFYU01001339_1_p1;Ancoracysta_twista|GFYU01004127_1_p1;Ancoracysta_twista|GFYU01008930_1_p1;Ancoracysta_twista|GFYU01010730_1_p1;Ancoracysta_twista|GFYU01015247_1_p1;Ancoracysta_twista|GFYU01020910_1_p1;Hemimastix_kukwesjijk|EP00696_Hemimastix_kukwesjijk_P011797;Meteora_sporadica|NODE_1730_length_2985_cov_294_831737_g1414_i0;Meteora_sporadica|NODE_2053_length_2769_cov_535_21418…
cluster568	GO:0048471; C:perinuclear region of cytoplasm; IEA:UniProtKB-SubCell	24	F4HYD7	Ancoracysta_twista|GFYU01001837_1_p1;Ancoracysta_twista|GFYU01004387_1_p1;Ancoracysta_twista|GFYU01056720_1_p1;Hemimastix_kukwesjijk|EP00696_Hemimastix_kukwesjijk_P019623;Hemimastix_kukwesjijk|EP00696_Hemimastix_kukwesjijk_P019624;Hemimastix_kukwesjijk|EP00696_Hemimastix_kukwesjijk_P019625;Meteora_sporadica|NODE_5350_length_1472_cov_28_554217_g4343_i0;Nebulomonas_marisrubri|TRINITY_DN4777_c0_g1_T…
cluster569	GO:0031288; P:sorocarp morphogenesis; IMP:dictyBase	24	Q8T664	Ancoracysta_twista|GFYU01002343_1_p1;Ancoracysta_twista|GFYU01002842_1_p1;Hemimastix_kukwesjijk|EP00696_Hemimastix_kukwesjijk_P012524;Hemimastix_kukwesjijk|EP00696_Hemimastix_kukwesjijk_P018839;Meteora_sporadica|NODE_7125_length_1130_cov_61_439663_g5850_i0;Meteora_sporadica|NODE_7578_length_1054_cov_27_339376_g6227_i0;Nebulomonas_marisrubri|TRINITY_DN10300_c0_g1_TRINITY_DN10300_c0_g1_i1_g_14226_m…
cluster570	GO:0048250; P:iron import into the mitochondrion; ISS:dictyBase	24	Q55DY8	Ancoracysta_twista|GFYU01002668_1_p1;Ancoracysta_twista|GFYU01010009_1_p1;Ancoracysta_twista|GFYU01014904_1_p1;Ancoracysta_twista|GFYU01040146_1_p1;Hemimastix_kukwesjijk|EP00696_Hemimastix_kukwesjijk_P015966;Meteora_sporadica|NODE_6795_length_1191_cov_29_236283_g5575_i0;Meteora_sporadica|NODE_7367_length_1089_cov_5_932879_g6045_i0;Nebulomonas_marisrubri|TRINITY_DN11167_c0_g1_TRINITY_DN11167_c0_g1…
cluster576	GO:0055085; P:transmembrane transport; IEA:InterPro	24	Q5XKJ1	Ancoracysta_twista|GFYU01003646_1_p1;Ancoracysta_twista|GFYU01010833_1_p1;Ancoracysta_twista|GFYU01013225_1_p1;Ancoracysta_twista|GFYU01024913_1_p1;Ancoracysta_twista|GFYU01063583_1_p2;Hemimastix_kukwesjijk|EP00696_Hemimastix_kukwesjijk_P014230;Hemimastix_kukwesjijk|EP00696_Hemimastix_kukwesjijk_P019766;Hemimastix_kukwesjijk|EP00696_Hemimastix_kukwesjijk_P019768;Meteora_sporadica|NODE_2127_length…
cluster579	GO:0008526; F:phosphatidylinositol transporter activity; IDA:dictyBase	24	Q9NCL8	Ancoracysta_twista|GFYU01004553_1_p1;Hemimastix_kukwesjijk|EP00696_Hemimastix_kukwesjijk_P006953;Meteora_sporadica|NODE_7029_length_1146_cov_31_468203_g5774_i0;Meteora_sporadica|NODE_7387_length_1085_cov_179_815430_g6062_i0;Meteora_sporadica|NODE_7389_length_1085_cov_73_665039_g6064_i0;Nebulomonas_marisrubri|TRINITY_DN5536_c0_g1_TRINITY_DN5536_c0_g1_i1_g_59339_m_59339;Nebulomonas_marisrubri|TRINI…
cluster581	GO:0002155; P:regulation of thyroid hormone mediated signaling pathway; IMP:MGI	24	Q7TMR0	Ancoracysta_twista|GFYU01005623_1_p1;Ancoracysta_twista|GFYU01011986_1_p1;Ancoracysta_twista|GFYU01017320_1_p1;Hemimastix_kukwesjijk|EP00696_Hemimastix_kukwesjijk_P004717;Hemimastix_kukwesjijk|EP00696_Hemimastix_kukwesjijk_P006113;Meteora_sporadica|NODE_4960_length_1565_cov_65_408910_g4011_i0;Nebulomonas_marisrubri|TRINITY_DN11800_c0_g1_TRINITY_DN11800_c0_g1_i1_g_25472_m_25472;Nibbleromonas_arcti…
cluster582	GO:0016126; P:sterol biosynthetic process; IEA:UniProtKB-UniPathway	24	Q54I98	Ancoracysta_twista|GFYU01005953_1_p1;Ancoracysta_twista|GFYU01010869_1_p2;Hemimastix_kukwesjijk|EP00696_Hemimastix_kukwesjijk_P003525;Meteora_sporadica|NODE_6698_length_1212_cov_1985_757602_g5490_i0;Meteora_sporadica|NODE_7740_length_1025_cov_45_842324_g6370_i0;Meteora_sporadica|NODE_7948_length_992_cov_14_321160_g6543_i0;Nebulomonas_marisrubri|TRINITY_DN4244_c0_g1_TRINITY_DN4244_c0_g1_i1_g_6747_…
cluster583	GO:0055085; P:transmembrane transport; IEA:InterPro	24	Q0VA82	Ancoracysta_twista|GFYU01005982_1_p1;Ancoracysta_twista|GFYU01007427_1_p1;Ancoracysta_twista|GFYU01014445_1_p2;Ancoracysta_twista|GFYU01015524_1_p1;Ancoracysta_twista|GFYU01016505_1_p1;Ancoracysta_twista|GFYU01025561_1_p1;Ancoracysta_twista|GFYU01053798_1_p1;Hemimastix_kukwesjijk|EP00696_Hemimastix_kukwesjijk_P014486;Meteora_sporadica|NODE_4645_length_1645_cov_29_163510_g3764_i0;Meteora_sporadica…
cluster586	GO:0006423; P:cysteinyl-tRNA aminoacylation; ISS:UniProtKB	24	Q54KR1	Ancoracysta_twista|GFYU01008252_1_p1;Ancoracysta_twista|GFYU01026884_1_p1;Hemimastix_kukwesjijk|EP00696_Hemimastix_kukwesjijk_P001811;Meteora_sporadica|NODE_3538_length_2002_cov_52_814529_g2861_i0;Meteora_sporadica|NODE_3587_length_1985_cov_45_228690_g2901_i0;Nebulomonas_marisrubri|TRINITY_DN6966_c0_g1_TRINITY_DN6966_c0_g1_i1_g_24424_m_24424;Nebulomonas_marisrubri|TRINITY_DN6966_c0_g1_TRINITY_DN6…
cluster588	GO:0006814; P:sodium ion transport; IDA:TAIR	24	O04034	Ancoracysta_twista|GFYU01011147_1_p1;Ancoracysta_twista|GFYU01016978_1_p1;Ancoracysta_twista|GFYU01054702_1_p1;Hemimastix_kukwesjijk|EP00696_Hemimastix_kukwesjijk_P011298;Meteora_sporadica|NODE_4126_length_1793_cov_36_909931_g3346_i0;Nebulomonas_marisrubri|TRINITY_DN4145_c0_g1_TRINITY_DN4145_c0_g1_i1_g_353_m_353;Nebulomonas_marisrubri|TRINITY_DN9567_c0_g1_TRINITY_DN9567_c0_g1_i1_g_79497_m_79497;N…
cluster591	GO:0008654; P:phospholipid biosynthetic process; IMP:TAIR	24	O81024	Ancoracysta_twista|GFYU01014776_1_p1;Ancoracysta_twista|GFYU01014981_1_p1;Ancoracysta_twista|GFYU01025742_1_p1;Hemimastix_kukwesjijk|EP00696_Hemimastix_kukwesjijk_P008496;Meteora_sporadica|NODE_8564_length_890_cov_5_136309_g7075_i0;Nebulomonas_marisrubri|TRINITY_DN11700_c0_g1_TRINITY_DN11700_c0_g1_i1_g_43978_m_43978;Nebulomonas_marisrubri|TRINITY_DN2665_c0_g1_TRINITY_DN2665_c0_g1_i2_g_53585_m_535…
cluster592	GO:0006656; P:phosphatidylcholine biosynthetic process; ISO:PomBase	24	O94673	Ancoracysta_twista|GFYU01014983_1_p1;Ancoracysta_twista|GFYU01015958_1_p1;Ancoracysta_twista|GFYU01020456_1_p1;Ancoracysta_twista|GFYU01020696_1_p1;Ancoracysta_twista|GFYU01022766_1_p1;Ancoracysta_twista|GFYU01056137_1_p1;Hemimastix_kukwesjijk|EP00696_Hemimastix_kukwesjijk_P015800;Meteora_sporadica|NODE_5059_length_1542_cov_22_524646_g4100_i0;Nebulomonas_marisrubri|TRINITY_DN11342_c0_g1_TRINITY_D…
cluster596	GO:0033314; P:mitotic DNA replication checkpoint; IBA:GO_Central	24	Q58DC8	Ancoracysta_twista|GFYU01021550_1_p2;Ancoracysta_twista|GFYU01046636_1_p1;Ancoracysta_twista|GFYU01075193_1_p1;Hemimastix_kukwesjijk|EP00696_Hemimastix_kukwesjijk_P017810;Meteora_sporadica|NODE_3532_length_2006_cov_39_232391_g2856_i0;Meteora_sporadica|NODE_4561_length_1668_cov_21_018668_g3693_i0;Nebulomonas_marisrubri|TRINITY_DN23293_c0_g1_TRINITY_DN23293_c0_g1_i1_g_60710_m_60710;Nebulomonas_mari…
cluster601	GO:0046856; P:phosphatidylinositol dephosphorylation; ISS:UniProtKB	24	Q6GM29	Ancoracysta_twista|GFYU01043146_1_p1;Hemimastix_kukwesjijk|EP00696_Hemimastix_kukwesjijk_P008897;Hemimastix_kukwesjijk|EP00696_Hemimastix_kukwesjijk_P008898;Meteora_sporadica|NODE_4132_length_1791_cov_94_920809_g3352_i0;Nebulomonas_marisrubri|TRINITY_DN13974_c0_g1_TRINITY_DN13974_c0_g1_i2_g_70120_m_70120;Nebulomonas_marisrubri|TRINITY_DN4847_c1_g1_TRINITY_DN4847_c1_g1_i1_g_30945_m_30945;Nebulomon…
cluster612	GO:0003746; F:translation elongation factor activity; IEA:UniProtKB-KW	23	P12262	Ancoracysta_twista|GFYU01000732_1_p1;Hemimastix_kukwesjijk|EP00696_Hemimastix_kukwesjijk_P015418;Meteora_sporadica|NODE_11183_length_544_cov_405_343685_g9445_i0;Meteora_sporadica|NODE_4721_length_1628_cov_103_213146_g3826_i0;Meteora_sporadica|NODE_5436_length_1454_cov_140_599426_g3826_i1;Nebulomonas_marisrubri|TRINITY_DN14663_c0_g1_TRINITY_DN14663_c0_g1_i1_g_19603_m_19603;Nibbleromonas_arcticus|T…
cluster615	GO:0005509; F:calcium ion binding; IEA:InterPro	23	Q40302	Ancoracysta_twista|GFYU01001448_1_p1;Ancoracysta_twista|GFYU01001812_1_p2;Ancoracysta_twista|GFYU01011381_1_p1;Ancoracysta_twista|GFYU01013112_1_p1;Ancoracysta_twista|GFYU01032742_1_p1;Ancoracysta_twista|GFYU01043698_1_p1;Hemimastix_kukwesjijk|EP00696_Hemimastix_kukwesjijk_P000669;Hemimastix_kukwesjijk|EP00696_Hemimastix_kukwesjijk_P002168;Meteora_sporadica|NODE_1357_length_3335_cov_24_460293_g11…
cluster618	GO:0030154; P:cell differentiation; IEA:UniProtKB-KW	23	A2T7G9	Ancoracysta_twista|GFYU01002463_1_p1;Ancoracysta_twista|GFYU01009899_1_p1;Ancoracysta_twista|GFYU01012562_1_p1;Ancoracysta_twista|GFYU01021904_1_p2;Hemimastix_kukwesjijk|EP00696_Hemimastix_kukwesjijk_P007236;Meteora_sporadica|NODE_9234_length_785_cov_73_519337_g7661_i0;Nebulomonas_marisrubri|TRINITY_DN14377_c0_g1_TRINITY_DN14377_c0_g1_i1_g_69072_m_69072;Nebulomonas_marisrubri|TRINITY_DN8166_c0_g1…
cluster619	N/A	23	N/A	Ancoracysta_twista|GFYU01002464_1_p1;Ancoracysta_twista|GFYU01018345_1_p1;Ancoracysta_twista|GFYU01024040_1_p1;Hemimastix_kukwesjijk|EP00696_Hemimastix_kukwesjijk_P020316;Hemimastix_kukwesjijk|EP00696_Hemimastix_kukwesjijk_P020322;Meteora_sporadica|NODE_7628_length_1044_cov_7_302136_g6270_i0;Nebulomonas_marisrubri|TRINITY_DN13994_c1_g2_TRINITY_DN13994_c1_g2_i2_g_71569_m_71569;Nebulomonas_marisrub…
cluster620	GO:0010228; P:vegetative to reproductive phase transition of meristem; IGI:TAIR	23	P25865	Ancoracysta_twista|GFYU01003009_1_p1;Ancoracysta_twista|GFYU01004328_1_p1;Ancoracysta_twista|GFYU01021867_1_p1;Ancoracysta_twista|GFYU01085171_1_p1;Hemimastix_kukwesjijk|EP00696_Hemimastix_kukwesjijk_P003472;Hemimastix_kukwesjijk|EP00696_Hemimastix_kukwesjijk_P016122;Meteora_sporadica|NODE_11231_length_539_cov_97_765690_g9491_i0;Nebulomonas_marisrubri|TRINITY_DN12002_c0_g1_TRINITY_DN12002_c0_g1_i…
cluster621	GO:0045454; P:cell redox homeostasis; IEA:InterPro	23	B9A1H3	Ancoracysta_twista|GFYU01003548_1_p1;Ancoracysta_twista|GFYU01006000_1_p1;Ancoracysta_twista|GFYU01008551_1_p1;Ancoracysta_twista|GFYU01043075_1_p1;Hemimastix_kukwesjijk|EP00696_Hemimastix_kukwesjijk_P010414;Meteora_sporadica|NODE_4088_length_1801_cov_94_287356_g3318_i0;Meteora_sporadica|NODE_4341_length_1724_cov_9_960914_g3519_i0;Nebulomonas_marisrubri|TRINITY_DN27891_c0_g1_TRINITY_DN27891_c0_g1…
cluster624	GO:0006400; P:tRNA modification; IBA:GO_Central	23	P36428	Ancoracysta_twista|GFYU01004295_1_p2;Hemimastix_kukwesjijk|EP00696_Hemimastix_kukwesjijk_P005576;Hemimastix_kukwesjijk|EP00696_Hemimastix_kukwesjijk_P005577;Meteora_sporadica|NODE_1444_length_3235_cov_74_602394_g1182_i0;Meteora_sporadica|NODE_2529_length_2461_cov_24_400417_g2049_i0;Nebulomonas_marisrubri|TRINITY_DN5427_c0_g1_TRINITY_DN5427_c0_g1_i1_g_77755_m_77755;Nibbleromonas_arcticus|TRINITY_D…
cluster628	GO:0033543; P:fatty acid beta-oxidation, unsaturated, even number, reductase/isomerase pathway; IMP:EcoCyc	23	P42593	Ancoracysta_twista|GFYU01005405_1_p1;Hemimastix_kukwesjijk|EP00696_Hemimastix_kukwesjijk_P013573;Meteora_sporadica|NODE_6973_length_1156_cov_16_315068_g5726_i0;Nebulomonas_marisrubri|TRINITY_DN13206_c0_g1_TRINITY_DN13206_c0_g1_i1_g_8982_m_8982;Nibbleromonas_arcticus|TRINITY_DN1324_c0_g1_TRINITY_DN1324_c0_g1_i1_g_32631_m_32631;Nibbleromonas_arcticus|TRINITY_DN22671_c0_g1_TRINITY_DN22671_c0_g1_i1_g…
cluster638	GO:0016310; P:nucleotide phosphorylation; IBA:GO_Central	23	Q84JE8	Ancoracysta_twista|GFYU01010813_1_p1;Ancoracysta_twista|GFYU01016639_1_p1;Ancoracysta_twista|GFYU01033736_1_p1;Ancoracysta_twista|GFYU01047221_1_p1;Hemimastix_kukwesjijk|EP00696_Hemimastix_kukwesjijk_P010163;Meteora_sporadica|NODE_6153_length_1310_cov_23_702962_g5033_i0;Nebulomonas_marisrubri|TRINITY_DN10334_c0_g1_TRINITY_DN10334_c0_g1_i3_g_91938_m_91938;Nebulomonas_marisrubri|TRINITY_DN13504_c3_…
cluster643	GO:0035999; P:tetrahydrofolate interconversion; IEA:UniProtKB-UniPathway	23	P50433	Ancoracysta_twista|GFYU01013178_1_p1;Ancoracysta_twista|GFYU01025006_1_p1;Hemimastix_kukwesjijk|EP00696_Hemimastix_kukwesjijk_P000954;Hemimastix_kukwesjijk|EP00696_Hemimastix_kukwesjijk_P000955;Hemimastix_kukwesjijk|EP00696_Hemimastix_kukwesjijk_P000956;Meteora_sporadica|NODE_4890_length_1582_cov_28_825115_g3959_i0;Meteora_sporadica|NODE_5296_length_1485_cov_21_109551_g4297_i0;Nebulomonas_marisru…
cluster647	GO:0006487; P:protein N-linked glycosylation; ISO:PomBase	23	Q9USH8	Ancoracysta_twista|GFYU01017337_1_p1;Ancoracysta_twista|GFYU01026342_1_p1;Ancoracysta_twista|GFYU01026376_1_p1;Hemimastix_kukwesjijk|EP00696_Hemimastix_kukwesjijk_P008647;Meteora_sporadica|NODE_6183_length_1306_cov_44_894779_g5059_i0;Nebulomonas_marisrubri|TRINITY_DN11080_c0_g1_TRINITY_DN11080_c0_g1_i1_g_48942_m_48942;Nebulomonas_marisrubri|TRINITY_DN11080_c0_g1_TRINITY_DN11080_c0_g1_i2_g_48944_m…
cluster652	GO:0006665; P:sphingolipid metabolic process; ISS:UniProtKB	23	Q9VIP7	Ancoracysta_twista|GFYU01025466_1_p1;Ancoracysta_twista|GFYU01036994_1_p1;Hemimastix_kukwesjijk|EP00696_Hemimastix_kukwesjijk_P008202;Hemimastix_kukwesjijk|EP00696_Hemimastix_kukwesjijk_P008203;Meteora_sporadica|NODE_8583_length_886_cov_113_135758_g7092_i0;Nebulomonas_marisrubri|TRINITY_DN1308_c0_g1_TRINITY_DN1308_c0_g1_i1_g_37845_m_37845;Nebulomonas_marisrubri|TRINITY_DN1408_c0_g1_TRINITY_DN1408…
cluster668	GO:0006334; P:nucleosome assembly; IBA:GO_Central	22	P84227	Ancoracysta_twista|GFYU01000044_1_p1;Ancoracysta_twista|GFYU01007354_1_p1;Ancoracysta_twista|GFYU01010037_1_p1;Hemimastix_kukwesjijk|EP00696_Hemimastix_kukwesjijk_P014935;Meteora_sporadica|NODE_10357_length_643_cov_4_637457_g8668_i0;Meteora_sporadica|NODE_11116_length_553_cov_16_839431_g9381_i0;Nebulomonas_marisrubri|TRINITY_DN12072_c0_g1_TRINITY_DN12072_c0_g1_i2_g_29810_m_29810;Nebulomonas_maris…
cluster669	GO:0004467; F:long-chain fatty acid-CoA ligase activity; IEA:UniProtKB-EC	22	Q7ZYC4	Ancoracysta_twista|GFYU01000169_1_p1;Ancoracysta_twista|GFYU01000373_1_p1;Hemimastix_kukwesjijk|EP00696_Hemimastix_kukwesjijk_P019251;Meteora_sporadica|NODE_3560_length_1994_cov_3306_764097_g2880_i0;Meteora_sporadica|NODE_9459_length_756_cov_948_149640_g7864_i0;Nebulomonas_marisrubri|TRINITY_DN9063_c0_g1_TRINITY_DN9063_c0_g1_i1_g_42995_m_42995;Nebulomonas_marisrubri|TRINITY_DN9138_c0_g1_TRINITY_D…
cluster670	GO:0045893; P:positive regulation of transcription, DNA-templated; IBA:GO_Central	22	Q75IZ7	Ancoracysta_twista|GFYU01000218_1_p1;Ancoracysta_twista|GFYU01009745_1_p1;Hemimastix_kukwesjijk|EP00696_Hemimastix_kukwesjijk_P005731;Hemimastix_kukwesjijk|EP00696_Hemimastix_kukwesjijk_P018532;Meteora_sporadica|NODE_11364_length_523_cov_20_913420_g9615_i0;Nebulomonas_marisrubri|TRINITY_DN29176_c0_g1_TRINITY_DN29176_c0_g1_i1_g_31613_m_31613;Nebulomonas_marisrubri|TRINITY_DN8883_c0_g2_TRINITY_DN88…
cluster678	GO:0030245; P:cellulose catabolic process; IEA:UniProtKB-KW	22	Q9GV16	Ancoracysta_twista|GFYU01002818_1_p1;Ancoracysta_twista|GFYU01011707_1_p1;Ancoracysta_twista|GFYU01022775_1_p2;Hemimastix_kukwesjijk|EP00696_Hemimastix_kukwesjijk_P004703;Meteora_sporadica|NODE_4696_length_1634_cov_69_719644_g3806_i0;Nebulomonas_marisrubri|TRINITY_DN12350_c0_g1_TRINITY_DN12350_c0_g1_i1_g_7807_m_7807;Nebulomonas_marisrubri|TRINITY_DN983_c0_g1_TRINITY_DN983_c0_g1_i1_g_42325_m_42325…
cluster679	GO:0001570; P:vasculogenesis; IEA:Ensembl	22	O95470	Ancoracysta_twista|GFYU01003159_1_p1;Ancoracysta_twista|GFYU01007687_1_p1;Hemimastix_kukwesjijk|EP00696_Hemimastix_kukwesjijk_P006784;Meteora_sporadica|NODE_4159_length_1783_cov_31_935540_g3377_i0;Meteora_sporadica|NODE_4510_length_1679_cov_137_457973_g3656_i0;Nebulomonas_marisrubri|TRINITY_DN12070_c0_g1_TRINITY_DN12070_c0_g1_i1_g_29604_m_29604;Nebulomonas_marisrubri|TRINITY_DN6294_c0_g1_TRINITY_…
cluster682	GO:0042761; P:very long-chain fatty acid biosynthetic process; IBA:GO_Central	22	O17040	Ancoracysta_twista|GFYU01003205_1_p1;Ancoracysta_twista|GFYU01013751_1_p1;Hemimastix_kukwesjijk|EP00696_Hemimastix_kukwesjijk_P016380;Meteora_sporadica|NODE_9316_length_773_cov_79_293539_g7733_i0;Meteora_sporadica|NODE_9748_length_720_cov_43_534143_g8120_i0;Nebulomonas_marisrubri|TRINITY_DN11016_c0_g1_TRINITY_DN11016_c0_g1_i1_g_48654_m_48654;Nebulomonas_marisrubri|TRINITY_DN4218_c0_g1_TRINITY_DN4…
cluster685	GO:0015937; P:coenzyme A biosynthetic process; IEA:UniProtKB-UniPathway	22	Q8L5Y9	Ancoracysta_twista|GFYU01004125_1_p1;Hemimastix_kukwesjijk|EP00696_Hemimastix_kukwesjijk_P011488;Meteora_sporadica|NODE_2259_length_2630_cov_50_405995_g1742_i1;Nebulomonas_marisrubri|TRINITY_DN32215_c1_g7_TRINITY_DN32215_c1_g7_i1_g_54409_m_54409;Nebulomonas_marisrubri|TRINITY_DN7011_c0_g1_TRINITY_DN7011_c0_g1_i1_g_32808_m_32808;Nibbleromonas_arcticus|TRINITY_DN13818_c0_g1_TRINITY_DN13818_c0_g1_i1…
cluster695	GO:0016021; C:integral component of membrane; IEA:UniProtKB-KW	22	A6QL92	Ancoracysta_twista|GFYU01005751_1_p1;Ancoracysta_twista|GFYU01008498_1_p1;Ancoracysta_twista|GFYU01052052_1_p1;Ancoracysta_twista|GFYU01081078_1_p1;Hemimastix_kukwesjijk|EP00696_Hemimastix_kukwesjijk_P017864;Meteora_sporadica|NODE_11973_length_461_cov_29_497500_g10213_i0;Nebulomonas_marisrubri|TRINITY_DN13707_c0_g1_TRINITY_DN13707_c0_g1_i1_g_46599_m_46599;Nebulomonas_marisrubri|TRINITY_DN37009_c0…
cluster696	GO:0006685; P:sphingomyelin catabolic process; ISS:dictyBase	22	Q55C09	Ancoracysta_twista|GFYU01005774_1_p1;Ancoracysta_twista|GFYU01008479_1_p1;Ancoracysta_twista|GFYU01010319_1_p1;Ancoracysta_twista|GFYU01018083_1_p1;Ancoracysta_twista|GFYU01048039_1_p1;Ancoracysta_twista|GFYU01078042_1_p1;Ancoracysta_twista|GFYU01094181_1_p2;Hemimastix_kukwesjijk|EP00696_Hemimastix_kukwesjijk_P015791;Meteora_sporadica|NODE_4804_length_1605_cov_12_975389_g3891_i0;Nebulomonas_maris…
cluster697	GO:0006221; P:pyrimidine nucleotide biosynthetic process; IEA:UniProtKB-UniRule	22	P15700	Ancoracysta_twista|GFYU01006206_1_p1;Ancoracysta_twista|GFYU01006769_1_p1;Ancoracysta_twista|GFYU01008059_1_p1;Ancoracysta_twista|GFYU01025393_1_p1;Hemimastix_kukwesjijk|EP00696_Hemimastix_kukwesjijk_P007883;Hemimastix_kukwesjijk|EP00696_Hemimastix_kukwesjijk_P015243;Hemimastix_kukwesjijk|EP00696_Hemimastix_kukwesjijk_P018771;Meteora_sporadica|NODE_10211_length_661_cov_29_445000_g8538_i0;Nebulomo…
cluster704	GO:0007283; P:spermatogenesis; IEA:UniProtKB-KW	22	Q9QZE7	Ancoracysta_twista|GFYU01008969_1_p1;Ancoracysta_twista|GFYU01048058_1_p1;Hemimastix_kukwesjijk|EP00696_Hemimastix_kukwesjijk_P003563;Hemimastix_kukwesjijk|EP00696_Hemimastix_kukwesjijk_P003564;Hemimastix_kukwesjijk|EP00696_Hemimastix_kukwesjijk_P005769;Hemimastix_kukwesjijk|EP00696_Hemimastix_kukwesjijk_P005771;Hemimastix_kukwesjijk|EP00696_Hemimastix_kukwesjijk_P005773;Hemimastix_kukwesjijk|EP0…
cluster706	GO:0045116; P:protein neddylation; IBA:GO_Central	22	Q96GG9	Ancoracysta_twista|GFYU01009356_1_p1;Ancoracysta_twista|GFYU01045551_1_p1;Hemimastix_kukwesjijk|EP00696_Hemimastix_kukwesjijk_P004587;Hemimastix_kukwesjijk|EP00696_Hemimastix_kukwesjijk_P007695;Hemimastix_kukwesjijk|EP00696_Hemimastix_kukwesjijk_P012231;Hemimastix_kukwesjijk|EP00696_Hemimastix_kukwesjijk_P015646;Meteora_sporadica|NODE_11649_length_492_cov_22_967517_g9894_i0;Meteora_sporadica|NODE…
cluster707	GO:0004385; F:guanylate kinase activity; IBA:GO_Central	22	Q2QPW1	Ancoracysta_twista|GFYU01011725_1_p1;Ancoracysta_twista|GFYU01019307_1_p1;Ancoracysta_twista|GFYU01024803_1_p1;Hemimastix_kukwesjijk|EP00696_Hemimastix_kukwesjijk_P010242;Hemimastix_kukwesjijk|EP00696_Hemimastix_kukwesjijk_P012150;Meteora_sporadica|NODE_9925_length_697_cov_18_003145_g8278_i0;Nebulomonas_marisrubri|TRINITY_DN12085_c0_g1_TRINITY_DN12085_c0_g1_i1_g_29489_m_29489;Nebulomonas_marisrub…
cluster708	N/A	22	Q6NUC1	Ancoracysta_twista|GFYU01011763_1_p1;Hemimastix_kukwesjijk|EP00696_Hemimastix_kukwesjijk_P004879;Hemimastix_kukwesjijk|EP00696_Hemimastix_kukwesjijk_P006204;Hemimastix_kukwesjijk|EP00696_Hemimastix_kukwesjijk_P013479;Hemimastix_kukwesjijk|EP00696_Hemimastix_kukwesjijk_P014478;Hemimastix_kukwesjijk|EP00696_Hemimastix_kukwesjijk_P017669;Meteora_sporadica|NODE_12166_length_441_cov_188_518421_g10405_…
cluster717	GO:0097065; P:anterior head development; IEA:Ensembl	22	Q13206	Ancoracysta_twista|GFYU01016441_1_p1;Ancoracysta_twista|GFYU01029589_1_p1;Ancoracysta_twista|GFYU01070175_1_p1;Hemimastix_kukwesjijk|EP00696_Hemimastix_kukwesjijk_P008653;Hemimastix_kukwesjijk|EP00696_Hemimastix_kukwesjijk_P010305;Meteora_sporadica|NODE_3611_length_1977_cov_21_186848_g2922_i0;Meteora_sporadica|NODE_5148_length_1518_cov_5_123542_g4176_i0;Nebulomonas_marisrubri|TRINITY_DN3571_c0_g1…
cluster722	GO:0006364; P:rRNA processing; IEA:UniProtKB-KW	22	Q4PC17	Ancoracysta_twista|GFYU01031072_1_p1;Hemimastix_kukwesjijk|EP00696_Hemimastix_kukwesjijk_P018811;Meteora_sporadica|NODE_10940_length_573_cov_2_761719_g9214_i0;Meteora_sporadica|NODE_12805_length_386_cov_1_695385_g11042_i0;Meteora_sporadica|NODE_13145_length_359_cov_2_127517_g11382_i0;Nebulomonas_marisrubri|TRINITY_DN33482_c0_g1_TRINITY_DN33482_c0_g1_i1_g_55147_m_55147;Nibbleromonas_arcticus|TRINI…
cluster739	GO:0008234; F:cysteine-type peptidase activity; IEA:UniProtKB-KW	21	P25804	Ancoracysta_twista|GFYU01000242_1_p2;Ancoracysta_twista|GFYU01003658_1_p2;Hemimastix_kukwesjijk|EP00696_Hemimastix_kukwesjijk_P001234;Meteora_sporadica|NODE_6992_length_1152_cov_254_378552_g5413_i1;Meteora_sporadica|NODE_7099_length_1134_cov_2870_013048_g744_i1;Nebulomonas_marisrubri|TRINITY_DN424_c0_g1_TRINITY_DN424_c0_g1_i1_g_79951_m_79951;Nebulomonas_marisrubri|TRINITY_DN8099_c0_g1_TRINITY_DN8…
cluster741	GO:0016021; C:integral component of membrane; IEA:UniProtKB-KW	21	Q4G2J4	Ancoracysta_twista|GFYU01000405_1_p1;Ancoracysta_twista|GFYU01001397_1_p1;Ancoracysta_twista|GFYU01003382_1_p1;Hemimastix_kukwesjijk|EP00696_Hemimastix_kukwesjijk_P014270;Meteora_sporadica|NODE_7746_length_1024_cov_62_601246_g6374_i0;Meteora_sporadica|NODE_8734_length_861_cov_18_667500_g7220_i0;Nebulomonas_marisrubri|TRINITY_DN10953_c0_g1_TRINITY_DN10953_c0_g1_i1_g_36241_m_36241;Nebulomonas_maris…
cluster744	GO:0007018; P:microtubule-based movement; IBA:GO_Central	21	Q32P85	Ancoracysta_twista|GFYU01000987_1_p4;Hemimastix_kukwesjijk|EP00696_Hemimastix_kukwesjijk_P000247;Hemimastix_kukwesjijk|EP00696_Hemimastix_kukwesjijk_P018496;Meteora_sporadica|NODE_12470_length_414_cov_144_696884_g10707_i0;Nebulomonas_marisrubri|TRINITY_DN16713_c0_g1_TRINITY_DN16713_c0_g1_i1_g_73805_m_73805;Nibbleromonas_arcticus|TRINITY_DN1944_c0_g1_TRINITY_DN1944_c0_g1_i1_g_40500_m_40500;Nibbler…
cluster745	GO:0009793; P:embryo development ending in seed dormancy; IMP:TAIR	21	Q67Z52	Ancoracysta_twista|GFYU01001116_1_p1;Ancoracysta_twista|GFYU01020020_1_p1;Ancoracysta_twista|GFYU01057872_1_p1;Hemimastix_kukwesjijk|EP00696_Hemimastix_kukwesjijk_P002155;Meteora_sporadica|NODE_1011_length_3800_cov_86_892752_g827_i0;Nebulomonas_marisrubri|TRINITY_DN12176_c0_g1_TRINITY_DN12176_c0_g1_i3_g_17186_m_17186;Nebulomonas_marisrubri|TRINITY_DN12176_c0_g1_TRINITY_DN12176_c0_g1_i4_g_17187_m_…
cluster756	GO:0006364; P:rRNA processing; IMP:TAIR	21	Q9SA27	Ancoracysta_twista|GFYU01003371_1_p1;Hemimastix_kukwesjijk|EP00696_Hemimastix_kukwesjijk_P017636;Meteora_sporadica|NODE_4632_length_1648_cov_11_513548_g3752_i0;Meteora_sporadica|NODE_5013_length_1553_cov_6_693029_g4057_i0;Nebulomonas_marisrubri|TRINITY_DN11244_c0_g1_TRINITY_DN11244_c0_g1_i1_g_63271_m_63271;Nebulomonas_marisrubri|TRINITY_DN685_c0_g1_TRINITY_DN685_c0_g1_i2_g_84598_m_84598;Nibblerom…
cluster758	GO:0006979; P:response to oxidative stress; IEP:TAIR	21	Q9M291	Ancoracysta_twista|GFYU01003962_1_p1;Ancoracysta_twista|GFYU01004478_1_p1;Hemimastix_kukwesjijk|EP00696_Hemimastix_kukwesjijk_P009065;Meteora_sporadica|NODE_1077_length_3689_cov_86_550441_g882_i0;Meteora_sporadica|NODE_1130_length_3631_cov_91_265826_g882_i1;Meteora_sporadica|NODE_2427_length_2525_cov_5_786932_g1966_i0;Nebulomonas_marisrubri|TRINITY_DN10026_c0_g1_TRINITY_DN10026_c0_g1_i1_g_80419_m…
cluster761	GO:0016787; F:hydrolase activity; IEA:UniProtKB-KW	21	Q09676	Ancoracysta_twista|GFYU01006025_1_p1;Hemimastix_kukwesjijk|EP00696_Hemimastix_kukwesjijk_P002584;Hemimastix_kukwesjijk|EP00696_Hemimastix_kukwesjijk_P010403;Meteora_sporadica|NODE_2169_length_2684_cov_44_651925_g1764_i0;Nebulomonas_marisrubri|TRINITY_DN12865_c0_g1_TRINITY_DN12865_c0_g1_i1_g_5833_m_5833;Nebulomonas_marisrubri|TRINITY_DN26844_c0_g1_TRINITY_DN26844_c0_g1_i1_g_33122_m_33122;Nebulomon…
cluster762	GO:0046854; P:phosphatidylinositol phosphorylation; ISS:UniProtKB	21	Q9ESM0	Ancoracysta_twista|GFYU01006275_1_p1;Ancoracysta_twista|GFYU01007680_1_p1;Ancoracysta_twista|GFYU01081634_1_p1;Hemimastix_kukwesjijk|EP00696_Hemimastix_kukwesjijk_P016991;Meteora_sporadica|NODE_10098_length_676_cov_24_523577_g8439_i0;Nebulomonas_marisrubri|TRINITY_DN1151_c0_g1_TRINITY_DN1151_c0_g1_i1_g_58060_m_58060;Nebulomonas_marisrubri|TRINITY_DN11896_c0_g1_TRINITY_DN11896_c0_g1_i2_g_38136_m_3…
cluster763	GO:0032977; F:membrane insertase activity; IEA:InterPro	21	A4T0N2	Ancoracysta_twista|GFYU01006296_1_p1;Ancoracysta_twista|GFYU01018729_1_p1;Hemimastix_kukwesjijk|EP00696_Hemimastix_kukwesjijk_P000873;Meteora_sporadica|NODE_6259_length_1293_cov_3_549513_g5122_i0;Nebulomonas_marisrubri|TRINITY_DN10885_c0_g1_TRINITY_DN10885_c0_g1_i1_g_19282_m_19282;Nebulomonas_marisrubri|TRINITY_DN13499_c1_g2_TRINITY_DN13499_c1_g2_i1_g_82285_m_82285;Nebulomonas_marisrubri|TRINITY_…
cluster768	GO:0032868; P:response to insulin; IEP:RGD	21	Q9WVK7	Ancoracysta_twista|GFYU01007525_1_p1;Hemimastix_kukwesjijk|EP00696_Hemimastix_kukwesjijk_P001305;Hemimastix_kukwesjijk|EP00696_Hemimastix_kukwesjijk_P001306;Hemimastix_kukwesjijk|EP00696_Hemimastix_kukwesjijk_P004947;Meteora_sporadica|NODE_8004_length_982_cov_7_118350_g6589_i0;Nebulomonas_marisrubri|TRINITY_DN6880_c0_g1_TRINITY_DN6880_c0_g1_i2_g_27183_m_27183;Nibbleromonas_arcticus|TRINITY_DN4227…
cluster770	GO:0051013; P:microtubule severing; IEA:UniProtKB-UniRule	21	Q8H0T9	Ancoracysta_twista|GFYU01008017_1_p1;Ancoracysta_twista|GFYU01027768_1_p1;Ancoracysta_twista|GFYU01055013_1_p1;Ancoracysta_twista|GFYU01086851_1_p1;Hemimastix_kukwesjijk|EP00696_Hemimastix_kukwesjijk_P004705;Hemimastix_kukwesjijk|EP00696_Hemimastix_kukwesjijk_P010120;Hemimastix_kukwesjijk|EP00696_Hemimastix_kukwesjijk_P012342;Meteora_sporadica|NODE_3731_length_1931_cov_6_812299_g3026_i0;Nebulomon…
cluster781	GO:0005743; C:mitochondrial inner membrane; IEA:UniProtKB-SubCell	21	Q2TXA2	Ancoracysta_twista|GFYU01016673_1_p1;Ancoracysta_twista|GFYU01017389_1_p1;Hemimastix_kukwesjijk|EP00696_Hemimastix_kukwesjijk_P018120;Meteora_sporadica|NODE_10680_length_602_cov_86_048059_g8970_i0;Nebulomonas_marisrubri|TRINITY_DN11873_c0_g1_TRINITY_DN11873_c0_g1_i1_g_38192_m_38192;Nebulomonas_marisrubri|TRINITY_DN32410_c0_g1_TRINITY_DN32410_c0_g1_i1_g_50993_m_50993;Nibbleromonas_arcticus|TRINITY…
cluster785	GO:0007062; P:sister chromatid cohesion; IMP:TAIR	21	Q6Q1P4	Ancoracysta_twista|GFYU01022619_1_p1;Ancoracysta_twista|GFYU01037587_1_p1;Hemimastix_kukwesjijk|EP00696_Hemimastix_kukwesjijk_P002908;Meteora_sporadica|NODE_872_length_4037_cov_25_613934_g711_i0;Meteora_sporadica|NODE_936_length_3935_cov_17_544915_g763_i0;Nebulomonas_marisrubri|TRINITY_DN12243_c0_g1_TRINITY_DN12243_c0_g1_i1_g_34919_m_34919;Nebulomonas_marisrubri|TRINITY_DN13823_c0_g1_TRINITY_DN13…
cluster786	GO:0005525; F:GTP binding; IEA:UniProtKB-KW	21	Q54HP3	Ancoracysta_twista|GFYU01023975_1_p1;Hemimastix_kukwesjijk|EP00696_Hemimastix_kukwesjijk_P017435;Meteora_sporadica|NODE_6253_length_1293_cov_42_345779_g5116_i0;Meteora_sporadica|NODE_6703_length_1212_cov_8_590791_g5495_i0;Nebulomonas_marisrubri|TRINITY_DN11498_c0_g1_TRINITY_DN11498_c0_g1_i1_g_26685_m_26685;Nebulomonas_marisrubri|TRINITY_DN9746_c1_g1_TRINITY_DN9746_c1_g1_i1_g_91497_m_91497;Nibbler…
cluster814	GO:0032880; P:regulation of protein localization; ISS:UniProtKB	20	O42249	Ancoracysta_twista|GFYU01000464_1_p1;Ancoracysta_twista|GFYU01027401_1_p1;Hemimastix_kukwesjijk|EP00696_Hemimastix_kukwesjijk_P000712;Hemimastix_kukwesjijk|EP00696_Hemimastix_kukwesjijk_P016138;Meteora_sporadica|NODE_1776_length_2951_cov_1275_411765_g1452_i0;Meteora_sporadica|NODE_5840_length_1369_cov_3_122324_g4764_i0;Nebulomonas_marisrubri|TRINITY_DN10776_c0_g1_TRINITY_DN10776_c0_g1_i1_g_41405_…
cluster818	GO:0044671; P:sorocarp spore cell differentiation; IMP:dictyBase	20	Q54QB1	Ancoracysta_twista|GFYU01000630_1_p1;Ancoracysta_twista|GFYU01013476_1_p1;Ancoracysta_twista|GFYU01020264_1_p1;Hemimastix_kukwesjijk|EP00696_Hemimastix_kukwesjijk_P006231;Meteora_sporadica|NODE_4674_length_1638_cov_584_352568_g3788_i0;Nebulomonas_marisrubri|TRINITY_DN10615_c0_g1_TRINITY_DN10615_c0_g1_i1_g_44637_m_44637;Nebulomonas_marisrubri|TRINITY_DN14049_c2_g1_TRINITY_DN14049_c2_g1_i1_g_3139_m…
cluster819	GO:0010628; P:positive regulation of gene expression; IMP:ZFIN	20	A0MTA1	Ancoracysta_twista|GFYU01001435_1_p1;Ancoracysta_twista|GFYU01055414_1_p1;Hemimastix_kukwesjijk|EP00696_Hemimastix_kukwesjijk_P015895;Meteora_sporadica|NODE_6300_length_1286_cov_19_683265_g5160_i0;Meteora_sporadica|NODE_7261_length_1105_cov_24_286398_g5964_i0;Nebulomonas_marisrubri|TRINITY_DN10035_c0_g1_TRINITY_DN10035_c0_g1_i1_g_80552_m_80552;Nebulomonas_marisrubri|TRINITY_DN13066_c0_g1_TRINITY_…
cluster822	GO:0048448; P:stamen morphogenesis; IMP:TAIR	20	Q9LV09	Ancoracysta_twista|GFYU01001664_1_p1;Ancoracysta_twista|GFYU01059993_1_p1;Ancoracysta_twista|GFYU01067869_1_p1;Hemimastix_kukwesjijk|EP00696_Hemimastix_kukwesjijk_P009430;Meteora_sporadica|NODE_8949_length_826_cov_31_942484_g3669_i1;Nebulomonas_marisrubri|TRINITY_DN173_c0_g1_TRINITY_DN173_c0_g1_i2_g_88_m_88;Nebulomonas_marisrubri|TRINITY_DN32244_c0_g1_TRINITY_DN32244_c0_g1_i1_g_54382_m_54382;Nebu…
cluster824	GO:0001887; P:selenium compound metabolic process; IDA:TAIR	20	P55217	Ancoracysta_twista|GFYU01001834_1_p1;Ancoracysta_twista|GFYU01003474_1_p1;Ancoracysta_twista|GFYU01005780_1_p1;Ancoracysta_twista|GFYU01029365_1_p1;Hemimastix_kukwesjijk|EP00696_Hemimastix_kukwesjijk_P011140;Meteora_sporadica|NODE_6358_length_1274_cov_280_294312_g5209_i0;Nebulomonas_marisrubri|TRINITY_DN3173_c0_g1_TRINITY_DN3173_c0_g1_i1_g_83758_m_83758;Nebulomonas_marisrubri|TRINITY_DN6910_c0_g1…
cluster834	GO:0032465; P:regulation of cytokinesis; ISO:MGI	20	Q8VD65	Ancoracysta_twista|GFYU01003764_1_p1;Ancoracysta_twista|GFYU01063176_1_p1;Ancoracysta_twista|GFYU01064292_1_p1;Ancoracysta_twista|GFYU01082875_1_p2;Hemimastix_kukwesjijk|EP00696_Hemimastix_kukwesjijk_P002557;Meteora_sporadica|NODE_331_length_5933_cov_25_789680_g276_i0;Nebulomonas_marisrubri|TRINITY_DN11756_c0_g1_TRINITY_DN11756_c0_g1_i1_g_25757_m_25757;Nibbleromonas_arcticus|TRINITY_DN1633_c0_g1_…
cluster836	GO:0006552; P:leucine catabolic process; IEA:UniProtKB-UniPathway	20	Q54HG7	Ancoracysta_twista|GFYU01003835_1_p1;Ancoracysta_twista|GFYU01041390_1_p1;Hemimastix_kukwesjijk|EP00696_Hemimastix_kukwesjijk_P003197;Hemimastix_kukwesjijk|EP00696_Hemimastix_kukwesjijk_P013679;Meteora_sporadica|NODE_7960_length_990_cov_47_696448_g6553_i0;Meteora_sporadica|NODE_8156_length_958_cov_52_707915_g6722_i0;Nebulomonas_marisrubri|TRINITY_DN11549_c0_g1_TRINITY_DN11549_c0_g1_i1_g_10037_m_1…
cluster837	GO:0007035; P:vacuolar acidification; IBA:GO_Central	20	Q9Z1G4	Ancoracysta_twista|GFYU01003875_1_p1;Hemimastix_kukwesjijk|EP00696_Hemimastix_kukwesjijk_P008622;Meteora_sporadica|NODE_2333_length_2590_cov_56_990510_g1893_i0;Nebulomonas_marisrubri|TRINITY_DN11559_c0_g1_TRINITY_DN11559_c0_g1_i1_g_10089_m_10089;Nebulomonas_marisrubri|TRINITY_DN9414_c0_g1_TRINITY_DN9414_c0_g1_i1_g_64181_m_64181;Nibbleromonas_arcticus|TRINITY_DN4772_c0_g1_TRINITY_DN4772_c0_g1_i5_g…
cluster840	GO:0015031; P:protein transport; IEA:UniProtKB-KW	20	Q9JIG8	Ancoracysta_twista|GFYU01004115_1_p1;Ancoracysta_twista|GFYU01005235_1_p1;Hemimastix_kukwesjijk|EP00696_Hemimastix_kukwesjijk_P003118;Hemimastix_kukwesjijk|EP00696_Hemimastix_kukwesjijk_P012343;Meteora_sporadica|NODE_9631_length_733_cov_179_544643_g8011_i0;Meteora_sporadica|NODE_9937_length_696_cov_22_988976_g8289_i0;Nebulomonas_marisrubri|TRINITY_DN10980_c0_g1_TRINITY_DN10980_c0_g1_i2_g_36410_m_…
cluster841	GO:0006228; P:UTP biosynthetic process; IEA:InterPro	20	Q6NLG3	Ancoracysta_twista|GFYU01004209_1_p1;Ancoracysta_twista|GFYU01012454_1_p1;Hemimastix_kukwesjijk|EP00696_Hemimastix_kukwesjijk_P000595;Hemimastix_kukwesjijk|EP00696_Hemimastix_kukwesjijk_P019535;Meteora_sporadica|NODE_11391_length_520_cov_18_300654_g9641_i0;Nebulomonas_marisrubri|TRINITY_DN13245_c0_g1_TRINITY_DN13245_c0_g1_i1_g_8620_m_8620;Nebulomonas_marisrubri|TRINITY_DN13888_c8_g3_TRINITY_DN138…
cluster854	GO:0038202; P:TORC1 signaling; ISO:MGI	20	Q8K4Q0	Ancoracysta_twista|GFYU01008799_1_p1;Ancoracysta_twista|GFYU01011697_1_p1;Ancoracysta_twista|GFYU01020040_1_p1;Ancoracysta_twista|GFYU01025388_1_p1;Ancoracysta_twista|GFYU01031930_1_p1;Hemimastix_kukwesjijk|EP00696_Hemimastix_kukwesjijk_P013577;Meteora_sporadica|NODE_744_length_4299_cov_44_365503_g606_i0;Nebulomonas_marisrubri|TRINITY_DN11035_c0_g1_TRINITY_DN11035_c0_g1_i1_g_48649_m_48649;Nibbler…
cluster855	GO:0006405; P:RNA export from nucleus; TAS:Reactome	20	P26368	Ancoracysta_twista|GFYU01009854_1_p2;Ancoracysta_twista|GFYU01011622_1_p1;Ancoracysta_twista|GFYU01040344_1_p1;Hemimastix_kukwesjijk|EP00696_Hemimastix_kukwesjijk_P003966;Hemimastix_kukwesjijk|EP00696_Hemimastix_kukwesjijk_P008014;Hemimastix_kukwesjijk|EP00696_Hemimastix_kukwesjijk_P009067;Meteora_sporadica|NODE_6455_length_1259_cov_3_782972_g5292_i0;Nebulomonas_marisrubri|TRINITY_DN13871_c6_g3_T…
cluster859	GO:0006629; P:cellular lipid metabolic process; IDA:WormBase	20	G5EBI4	Ancoracysta_twista|GFYU01011479_1_p1;Ancoracysta_twista|GFYU01012742_1_p1;Ancoracysta_twista|GFYU01014864_1_p1;Hemimastix_kukwesjijk|EP00696_Hemimastix_kukwesjijk_P003388;Hemimastix_kukwesjijk|EP00696_Hemimastix_kukwesjijk_P003810;Meteora_sporadica|NODE_6821_length_1186_cov_139_194667_g5598_i0;Meteora_sporadica|NODE_7228_length_1110_cov_27_868446_g5935_i0;Nebulomonas_marisrubri|TRINITY_DN5302_c0_…
cluster860	GO:0003779; F:actin binding; IEA:UniProtKB-KW	20	P19984	Ancoracysta_twista|GFYU01011517_1_p1;Ancoracysta_twista|GFYU01047522_1_p1;Hemimastix_kukwesjijk|EP00696_Hemimastix_kukwesjijk_P013036;Meteora_sporadica|NODE_10488_length_627_cov_1902_954064_g8793_i0;Meteora_sporadica|NODE_11578_length_499_cov_38_180365_g9823_i0;Nebulomonas_marisrubri|TRINITY_DN19409_c0_g1_TRINITY_DN19409_c0_g1_i1_g_39352_m_39352;Nebulomonas_marisrubri|TRINITY_DN3774_c0_g1_TRINITY…
cluster861	GO:0006099; P:tricarboxylic acid cycle; IBA:GO_Central	20	Q54JE4	Ancoracysta_twista|GFYU01012886_1_p1;Ancoracysta_twista|GFYU01016252_1_p1;Ancoracysta_twista|GFYU01033714_1_p1;Ancoracysta_twista|GFYU01034970_1_p1;Ancoracysta_twista|GFYU01048960_1_p1;Ancoracysta_twista|GFYU01058028_1_p1;Ancoracysta_twista|GFYU01067607_1_p1;Hemimastix_kukwesjijk|EP00696_Hemimastix_kukwesjijk_P006091;Meteora_sporadica|NODE_1555_length_3133_cov_27_044922_g1273_i0;Meteora_sporadica…
cluster862	GO:0000398; P:mRNA splicing, via spliceosome; IBA:GO_Central	20	B6EUA9	Ancoracysta_twista|GFYU01016207_1_p1;Ancoracysta_twista|GFYU01084272_1_p1;Hemimastix_kukwesjijk|EP00696_Hemimastix_kukwesjijk_P009895;Hemimastix_kukwesjijk|EP00696_Hemimastix_kukwesjijk_P009896;Meteora_sporadica|NODE_3175_length_2141_cov_14_251442_g2572_i0;Nebulomonas_marisrubri|TRINITY_DN13444_c0_g1_TRINITY_DN13444_c0_g1_i1_g_82571_m_82571;Nebulomonas_marisrubri|TRINITY_DN13838_c5_g3_TRINITY_DN1…
cluster864	GO:0006506; P:GPI anchor biosynthetic process; IBA:GO_Central	20	Q1LZA0	Ancoracysta_twista|GFYU01016988_1_p1;Hemimastix_kukwesjijk|EP00696_Hemimastix_kukwesjijk_P013990;Hemimastix_kukwesjijk|EP00696_Hemimastix_kukwesjijk_P013993;Meteora_sporadica|NODE_4400_length_1710_cov_22_015767_g3563_i0;Nebulomonas_marisrubri|TRINITY_DN5209_c0_g1_TRINITY_DN5209_c0_g1_i1_g_51188_m_51188;Nibbleromonas_arcticus|TRINITY_DN18507_c0_g1_TRINITY_DN18507_c0_g1_i1_g_2257_m_2257;Nibbleromon…
cluster865	GO:0033209; P:tumor necrosis factor-mediated signaling pathway; ISO:MGI	20	Q99MN1	Ancoracysta_twista|GFYU01017750_1_p1;Hemimastix_kukwesjijk|EP00696_Hemimastix_kukwesjijk_P006742;Meteora_sporadica|NODE_3424_length_2044_cov_27_348462_g2766_i0;Meteora_sporadica|NODE_9411_length_762_cov_3_691869_g7820_i0;Nebulomonas_marisrubri|TRINITY_DN5049_c0_g1_TRINITY_DN5049_c0_g1_i2_g_65770_m_65770;Nebulomonas_marisrubri|TRINITY_DN8459_c0_g1_TRINITY_DN8459_c0_g1_i1_g_12859_m_12859;Nibbleromo…
cluster866	GO:0032496; P:response to lipopolysaccharide; IMP:BHF-UCL	20	Q61805	Ancoracysta_twista|GFYU01019714_1_p1;Ancoracysta_twista|GFYU01039008_1_p2;Ancoracysta_twista|GFYU01043214_1_p1;Hemimastix_kukwesjijk|EP00696_Hemimastix_kukwesjijk_P011837;Meteora_sporadica|NODE_2987_length_2224_cov_498_147480_g2416_i0;Meteora_sporadica|NODE_3834_length_1897_cov_662_806645_g2416_i1;Nebulomonas_marisrubri|TRINITY_DN12151_c0_g1_TRINITY_DN12151_c0_g1_i1_g_16845_m_16845;Nebulomonas_ma…
cluster871	GO:0042060; P:wound healing; IEP:RGD	20	P42346	Ancoracysta_twista|GFYU01029268_1_p1;Ancoracysta_twista|GFYU01041955_1_p1;Ancoracysta_twista|GFYU01051417_1_p1;Ancoracysta_twista|GFYU01077646_1_p1;Ancoracysta_twista|GFYU01095607_1_p1;Hemimastix_kukwesjijk|EP00696_Hemimastix_kukwesjijk_P014307;Meteora_sporadica|NODE_216_length_6866_cov_44_443350_g186_i0;Nebulomonas_marisrubri|TRINITY_DN13904_c1_g1_TRINITY_DN13904_c1_g1_i1_g_72014_m_72014;Nebulom…
cluster877	GO:0035999; P:tetrahydrofolate interconversion; IEA:UniProtKB-UniPathway	20	Q9SPK5	Ancoracysta_twista|GFYU01052502_1_p2;Hemimastix_kukwesjijk|EP00696_Hemimastix_kukwesjijk_P013192;Hemimastix_kukwesjijk|EP00696_Hemimastix_kukwesjijk_P013200;Meteora_sporadica|NODE_2941_length_2249_cov_56_840951_g2381_i0;Meteora_sporadica|NODE_7680_length_1034_cov_36_235355_g6318_i0;Nebulomonas_marisrubri|TRINITY_DN13842_c0_g1_TRINITY_DN13842_c0_g1_i1_g_97962_m_97962;Nibbleromonas_arcticus|TRINITY…
cluster879	GO:0008380; P:RNA splicing; IEA:UniProtKB-KW	20	Q9NW13	Ancoracysta_twista|GFYU01057977_1_p1;Ancoracysta_twista|GFYU01072892_1_p1;Ancoracysta_twista|GFYU01074240_1_p2;Hemimastix_kukwesjijk|EP00696_Hemimastix_kukwesjijk_P015546;Meteora_sporadica|NODE_10403_length_636_cov_2_822609_g8713_i0;Meteora_sporadica|NODE_6556_length_1241_cov_4_049153_g5374_i0;Nebulomonas_marisrubri|TRINITY_DN5362_c0_g1_TRINITY_DN5362_c0_g1_i1_g_72764_m_72764;Nebulomonas_marisrub…
cluster895	GO:0006048; P:UDP-N-acetylglucosamine biosynthetic process; ISS:dictyBase	19	Q54WR8	Ancoracysta_twista|GFYU01000459_1_p1;Ancoracysta_twista|GFYU01003006_1_p1;Hemimastix_kukwesjijk|EP00696_Hemimastix_kukwesjijk_P005496;Hemimastix_kukwesjijk|EP00696_Hemimastix_kukwesjijk_P007552;Meteora_sporadica|NODE_10470_length_629_cov_29_843310_g8776_i0;Nebulomonas_marisrubri|TRINITY_DN3995_c0_g1_TRINITY_DN3995_c0_g1_i1_g_37437_m_37437;Nibbleromonas_arcticus|TRINITY_DN3825_c0_g1_TRINITY_DN3825…
cluster896	GO:0097257; F:leukotriene B4 12-hydroxy dehydrogenase activity; TAS:Reactome	19	Q29073	Ancoracysta_twista|GFYU01000751_1_p1;Ancoracysta_twista|GFYU01025462_1_p1;Hemimastix_kukwesjijk|EP00696_Hemimastix_kukwesjijk_P003295;Hemimastix_kukwesjijk|EP00696_Hemimastix_kukwesjijk_P018640;Meteora_sporadica|NODE_6756_length_1197_cov_83_702465_g5540_i0;Nebulomonas_marisrubri|TRINITY_DN10792_c0_g1_TRINITY_DN10792_c0_g1_i1_g_41667_m_41667;Nibbleromonas_arcticus|TRINITY_DN1056_c0_g1_TRINITY_DN10…
cluster898	GO:0006624; P:vacuolar protein processing; IBA:GO_Central	19	Q9R0J8	Ancoracysta_twista|GFYU01001076_1_p1;Hemimastix_kukwesjijk|EP00696_Hemimastix_kukwesjijk_P011357;Meteora_sporadica|NODE_3950_length_1851_cov_162_789385_g3207_i0;Meteora_sporadica|NODE_5793_length_1376_cov_511_224335_g1351_i2;Nebulomonas_marisrubri|TRINITY_DN412_c0_g1_TRINITY_DN412_c0_g1_i1_g_79850_m_79850;Nibbleromonas_arcticus|TRINITY_DN22968_c0_g1_TRINITY_DN22968_c0_g1_i1_g_15246_m_15246;Nibble…
cluster899	GO:0006355; P:regulation of transcription, DNA-templated; IEA:InterPro	19	Q9FH40	Ancoracysta_twista|GFYU01001183_1_p1;Hemimastix_kukwesjijk|EP00696_Hemimastix_kukwesjijk_P016561;Meteora_sporadica|NODE_8495_length_901_cov_28_583333_g7020_i0;Nebulomonas_marisrubri|TRINITY_DN4318_c0_g1_TRINITY_DN4318_c0_g1_i2_g_52712_m_52712;Nebulomonas_marisrubri|TRINITY_DN4318_c0_g1_TRINITY_DN4318_c0_g1_i3_g_52714_m_52714;Nebulomonas_marisrubri|TRINITY_DN6853_c0_g1_TRINITY_DN6853_c0_g1_i1_g_27…
cluster901	GO:0006541; P:glutamine metabolic process; IBA:GO_Central	19	Q28IE5	Ancoracysta_twista|GFYU01001571_1_p1;Hemimastix_kukwesjijk|EP00696_Hemimastix_kukwesjijk_P004841;Hemimastix_kukwesjijk|EP00696_Hemimastix_kukwesjijk_P016112;Meteora_sporadica|NODE_7809_length_1013_cov_62_127101_g6430_i0;Meteora_sporadica|NODE_7983_length_986_cov_16_368649_g6573_i0;Nebulomonas_marisrubri|TRINITY_DN13207_c3_g3_TRINITY_DN13207_c3_g3_i3_g_8475_m_8475;Nibbleromonas_arcticus|TRINITY_DN…
cluster902	GO:0006801; P:superoxide metabolic process; ISS:dictyBase	19	Q55BJ9	Ancoracysta_twista|GFYU01001607_1_p1;Hemimastix_kukwesjijk|EP00696_Hemimastix_kukwesjijk_P006304;Hemimastix_kukwesjijk|EP00696_Hemimastix_kukwesjijk_P007241;Meteora_sporadica|NODE_7895_length_999_cov_1204_323028_g6500_i0;Meteora_sporadica|NODE_8443_length_910_cov_1527_709069_g6500_i1;Nebulomonas_marisrubri|TRINITY_DN8504_c0_g1_TRINITY_DN8504_c0_g1_i1_g_52745_m_52745;Nibbleromonas_arcticus|TRINITY…
cluster904	GO:0008542; P:visual learning; IEA:Ensembl	19	A7MB63	Ancoracysta_twista|GFYU01001811_1_p1;Ancoracysta_twista|GFYU01003192_1_p1;Hemimastix_kukwesjijk|EP00696_Hemimastix_kukwesjijk_P016553;Meteora_sporadica|NODE_7513_length_1067_cov_7_892644_g6174_i0;Meteora_sporadica|NODE_8177_length_955_cov_26_087248_g6740_i0;Nebulomonas_marisrubri|TRINITY_DN13832_c2_g8_TRINITY_DN13832_c2_g8_i1_g_98041_m_98041;Nebulomonas_marisrubri|TRINITY_DN14040_c5_g2_TRINITY_DN…
cluster913	GO:0000398; P:mRNA splicing, via spliceosome; IBA:GO_Central	19	Q4KMD3	Ancoracysta_twista|GFYU01002613_1_p2;Ancoracysta_twista|GFYU01010892_1_p2;Ancoracysta_twista|GFYU01053441_1_p1;Hemimastix_kukwesjijk|EP00696_Hemimastix_kukwesjijk_P015574;Hemimastix_kukwesjijk|EP00696_Hemimastix_kukwesjijk_P015575;Meteora_sporadica|NODE_3920_length_1863_cov_28_951165_g3180_i0;Meteora_sporadica|NODE_4140_length_1789_cov_31_712384_g3180_i1;Meteora_sporadica|NODE_9145_length_799_cov…
cluster914	GO:0009051; P:pentose-phosphate shunt, oxidative branch; IDA:TAIR	19	Q9FJI5	Ancoracysta_twista|GFYU01003085_1_p1;Hemimastix_kukwesjijk|EP00696_Hemimastix_kukwesjijk_P011445;Meteora_sporadica|NODE_2358_length_2574_cov_76_465579_g1915_i0;Nebulomonas_marisrubri|TRINITY_DN12328_c0_g1_TRINITY_DN12328_c0_g1_i1_g_8071_m_8071;Nebulomonas_marisrubri|TRINITY_DN12328_c0_g1_TRINITY_DN12328_c0_g1_i2_g_8072_m_8072;Nebulomonas_marisrubri|TRINITY_DN12328_c0_g1_TRINITY_DN12328_c0_g1_i3_g…
cluster915	GO:0005509; F:calcium ion binding; IEA:InterPro	19	P42322	Ancoracysta_twista|GFYU01003162_1_p2;Ancoracysta_twista|GFYU01011223_1_p1;Ancoracysta_twista|GFYU01023330_1_p1;Hemimastix_kukwesjijk|EP00696_Hemimastix_kukwesjijk_P002862;Meteora_sporadica|NODE_9952_length_693_cov_702_545886_g8304_i0;Nebulomonas_marisrubri|TRINITY_DN2815_c0_g1_TRINITY_DN2815_c0_g1_i1_g_68851_m_68851;Nibbleromonas_arcticus|TRINITY_DN17342_c0_g1_TRINITY_DN17342_c0_g1_i1_g_29020_m_2…
cluster917	N/A	19	N/A	Ancoracysta_twista|GFYU01003354_1_p1;Hemimastix_kukwesjijk|EP00696_Hemimastix_kukwesjijk_P000743;Meteora_sporadica|NODE_8305_length_931_cov_373_540230_g6851_i0;Meteora_sporadica|NODE_8445_length_909_cov_177_060142_g6977_i0;Meteora_sporadica|NODE_8671_length_872_cov_430_958076_g6851_i1;Nebulomonas_marisrubri|TRINITY_DN10613_c0_g1_TRINITY_DN10613_c0_g1_i1_g_44819_m_44819;Nibbleromonas_arcticus|TRIN…
cluster920	GO:0120015; F:sterol transfer activity; IBA:GO_Central	19	Q9DBS9	Ancoracysta_twista|GFYU01004010_1_p1;Hemimastix_kukwesjijk|EP00696_Hemimastix_kukwesjijk_P017100;Hemimastix_kukwesjijk|EP00696_Hemimastix_kukwesjijk_P017109;Meteora_sporadica|NODE_5801_length_1374_cov_68_203351_g4729_i0;Nebulomonas_marisrubri|TRINITY_DN1528_c0_g1_TRINITY_DN1528_c0_g1_i1_g_24240_m_24240;Nibbleromonas_arcticus|TRINITY_DN15697_c0_g1_TRINITY_DN15697_c0_g1_i1_g_30451_m_30451;Nibblerom…
cluster926	GO:0006890; P:retrograde vesicle-mediated transport, Golgi to ER; IBA:GO_Central	19	Q55FR9	Ancoracysta_twista|GFYU01004999_1_p1;Ancoracysta_twista|GFYU01016199_1_p1;Ancoracysta_twista|GFYU01024898_1_p1;Hemimastix_kukwesjijk|EP00696_Hemimastix_kukwesjijk_P002350;Meteora_sporadica|NODE_915_length_3959_cov_46_577989_g743_i0;Nebulomonas_marisrubri|TRINITY_DN13592_c0_g1_TRINITY_DN13592_c0_g1_i1_g_90061_m_90061;Nibbleromonas_arcticus|TRINITY_DN10892_c0_g1_TRINITY_DN10892_c0_g1_i1_g_15615_m_1…
cluster929	N/A	19	Q54VR8	Ancoracysta_twista|GFYU01005765_1_p1;Ancoracysta_twista|GFYU01007486_1_p1;Ancoracysta_twista|GFYU01057110_1_p1;Hemimastix_kukwesjijk|EP00696_Hemimastix_kukwesjijk_P003199;Hemimastix_kukwesjijk|EP00696_Hemimastix_kukwesjijk_P003358;Meteora_sporadica|NODE_2556_length_2450_cov_12_622855_g2074_i0;Meteora_sporadica|NODE_6162_length_1309_cov_30_830929_g5040_i0;Nebulomonas_marisrubri|TRINITY_DN13612_c4_…
cluster935	GO:0019722; P:calcium-mediated signaling; IBA:GO_Central	19	Q2R1Z5	Ancoracysta_twista|GFYU01008598_1_p1;Ancoracysta_twista|GFYU01010915_1_p1;Hemimastix_kukwesjijk|EP00696_Hemimastix_kukwesjijk_P018365;Meteora_sporadica|NODE_4805_length_1604_cov_63_691510_g3892_i0;Nebulomonas_marisrubri|TRINITY_DN15258_c0_g1_TRINITY_DN15258_c0_g1_i1_g_12509_m_12509;Nibbleromonas_arcticus|TRINITY_DN23787_c0_g1_TRINITY_DN23787_c0_g1_i1_g_33789_m_33789;Nibbleromonas_arcticus|TRINITY…
cluster940	GO:0042144; P:vacuole fusion, non-autophagic; IMP:SGD	19	P32567	Ancoracysta_twista|GFYU01010982_1_p1;Ancoracysta_twista|GFYU01023922_1_p1;Ancoracysta_twista|GFYU01033456_1_p1;Hemimastix_kukwesjijk|EP00696_Hemimastix_kukwesjijk_P006709;Hemimastix_kukwesjijk|EP00696_Hemimastix_kukwesjijk_P006710;Meteora_sporadica|NODE_1519_length_3165_cov_74_210696_g1244_i0;Nebulomonas_marisrubri|TRINITY_DN33928_c0_g1_TRINITY_DN33928_c0_g1_i1_g_58423_m_58423;Nebulomonas_marisru…
cluster943	GO:0051287; F:NAD binding; IEA:InterPro	19	P37221	Ancoracysta_twista|GFYU01013852_1_p1;Ancoracysta_twista|GFYU01018694_1_p1;Hemimastix_kukwesjijk|EP00696_Hemimastix_kukwesjijk_P011052;Meteora_sporadica|NODE_4393_length_1711_cov_279_219394_g3556_i0;Nebulomonas_marisrubri|TRINITY_DN12846_c0_g1_TRINITY_DN12846_c0_g1_i1_g_5940_m_5940;Nebulomonas_marisrubri|TRINITY_DN6623_c0_g1_TRINITY_DN6623_c0_g1_i1_g_27946_m_27946;Nibbleromonas_arcticus|TRINITY_DN…
cluster944	GO:0006886; P:intracellular protein transport; IEA:InterPro	19	Q9C5H4	Ancoracysta_twista|GFYU01014706_1_p1;Ancoracysta_twista|GFYU01019946_1_p1;Hemimastix_kukwesjijk|EP00696_Hemimastix_kukwesjijk_P012919;Hemimastix_kukwesjijk|EP00696_Hemimastix_kukwesjijk_P016985;Meteora_sporadica|NODE_5342_length_1475_cov_63_222065_g4336_i0;Nebulomonas_marisrubri|TRINITY_DN13254_c4_g2_TRINITY_DN13254_c4_g2_i2_g_9345_m_9345;Nebulomonas_marisrubri|TRINITY_DN13254_c5_g1_TRINITY_DN132…
cluster951	GO:0005634; C:nucleus; IBA:GO_Central	19	Q552R1	Ancoracysta_twista|GFYU01019901_1_p1;Hemimastix_kukwesjijk|EP00696_Hemimastix_kukwesjijk_P016612;Meteora_sporadica|NODE_7191_length_1118_cov_150_228950_g5905_i0;Meteora_sporadica|NODE_7543_length_1061_cov_186_591000_g5905_i1;Nebulomonas_marisrubri|TRINITY_DN3584_c0_g1_TRINITY_DN3584_c0_g1_i1_g_85483_m_85483;Nibbleromonas_arcticus|TRINITY_DN14121_c0_g1_TRINITY_DN14121_c0_g1_i1_g_10204_m_10204;Nibb…
cluster982	GO:0007017; P:microtubule-based process; IEA:InterPro	18	Q9ZRJ4	Ancoracysta_twista|GFYU01000035_1_p1;Hemimastix_kukwesjijk|EP00696_Hemimastix_kukwesjijk_P016310;Meteora_sporadica|NODE_10554_length_619_cov_14265_870968_g2400_i6;Meteora_sporadica|NODE_2965_length_2238_cov_8394_853468_g2400_i0;Meteora_sporadica|NODE_3739_length_1927_cov_18_242229_g3034_i0;Meteora_sporadica|NODE_4938_length_1571_cov_12606_828477_g2400_i3;Meteora_sporadica|NODE_6457_length_1258_co…
cluster985	GO:0000096; P:sulfur amino acid metabolic process; NAS:FlyBase	18	P08761	Ancoracysta_twista|GFYU01000301_1_p1;Ancoracysta_twista|GFYU01000471_1_p1;Hemimastix_kukwesjijk|EP00696_Hemimastix_kukwesjijk_P003302;Meteora_sporadica|NODE_10540_length_621_cov_49_126786_g8840_i0;Nebulomonas_marisrubri|TRINITY_DN13186_c0_g1_TRINITY_DN13186_c0_g1_i2_g_68117_m_68117;Nibbleromonas_arcticus|TRINITY_DN301_c0_g1_TRINITY_DN301_c0_g1_i1_g_11623_m_11623;Nibbleromonas_curacaus|TRINITY_DN1…
cluster986	GO:0006228; P:UTP biosynthetic process; IDA:RGD	18	P19804	Ancoracysta_twista|GFYU01000424_1_p2;Ancoracysta_twista|GFYU01011624_1_p1;Hemimastix_kukwesjijk|EP00696_Hemimastix_kukwesjijk_P007790;Hemimastix_kukwesjijk|EP00696_Hemimastix_kukwesjijk_P015302;Hemimastix_kukwesjijk|EP00696_Hemimastix_kukwesjijk_P015303;Meteora_sporadica|NODE_11276_length_534_cov_92_238901_g9533_i0;Meteora_sporadica|NODE_9087_length_805_cov_56_204301_g7529_i0;Nebulomonas_marisrub…
cluster987	GO:0005811; C:lipid droplet; IEA:UniProtKB-SubCell	18	Q28BP9	Ancoracysta_twista|GFYU01000432_1_p1;Ancoracysta_twista|GFYU01005021_1_p1;Ancoracysta_twista|GFYU01076568_1_p1;Hemimastix_kukwesjijk|EP00696_Hemimastix_kukwesjijk_P005571;Meteora_sporadica|NODE_7833_length_1009_cov_32_533755_g6450_i0;Nebulomonas_marisrubri|TRINITY_DN11099_c0_g1_TRINITY_DN11099_c0_g1_i1_g_48955_m_48955;Nibbleromonas_arcticus|TRINITY_DN23766_c0_g1_TRINITY_DN23766_c0_g1_i1_g_33778_m…
cluster988	GO:0000027; P:ribosomal large subunit assembly; IBA:GO_Central	18	P36584	Ancoracysta_twista|GFYU01000573_1_p2;Hemimastix_kukwesjijk|EP00696_Hemimastix_kukwesjijk_P005432;Meteora_sporadica|NODE_4850_length_1592_cov_3264_282169_g3927_i0;Nebulomonas_marisrubri|TRINITY_DN15335_c0_g1_TRINITY_DN15335_c0_g1_i1_g_32536_m_32536;Nebulomonas_marisrubri|TRINITY_DN30271_c0_g1_TRINITY_DN30271_c0_g1_i1_g_37639_m_37639;Nebulomonas_marisrubri|TRINITY_DN4126_c0_g1_TRINITY_DN4126_c0_g1_…
cluster997	GO:0016192; P:vesicle-mediated transport; IEA:InterPro	18	Q9LDK9	Ancoracysta_twista|GFYU01002120_1_p1;Ancoracysta_twista|GFYU01002235_1_p1;Ancoracysta_twista|GFYU01006054_1_p1;Ancoracysta_twista|GFYU01015662_1_p1;Hemimastix_kukwesjijk|EP00696_Hemimastix_kukwesjijk_P013179;Meteora_sporadica|NODE_2690_length_2376_cov_28_252268_g2180_i0;Nebulomonas_marisrubri|TRINITY_DN2655_c0_g1_TRINITY_DN2655_c0_g1_i1_g_53682_m_53682;Nibbleromonas_arcticus|TRINITY_DN8744_c0_g1_…
cluster1002	GO:0015031; P:protein transport; IEA:UniProtKB-KW	18	A7KAM0	Ancoracysta_twista|GFYU01002665_1_p1;Hemimastix_kukwesjijk|EP00696_Hemimastix_kukwesjijk_P008566;Meteora_sporadica|NODE_2717_length_2361_cov_29_960000_g2202_i0;Nebulomonas_marisrubri|TRINITY_DN12017_c0_g1_TRINITY_DN12017_c0_g1_i1_g_29416_m_29416;Nebulomonas_marisrubri|TRINITY_DN12017_c0_g1_TRINITY_DN12017_c0_g1_i2_g_29417_m_29417;Nebulomonas_marisrubri|TRINITY_DN12017_c0_g1_TRINITY_DN12017_c0_g1_…
cluster1007	GO:0098813; P:nuclear chromosome segregation; IMP:FlyBase	18	Q9V968	Ancoracysta_twista|GFYU01003742_1_p1;Hemimastix_kukwesjijk|EP00696_Hemimastix_kukwesjijk_P007108;Meteora_sporadica|NODE_10152_length_668_cov_15_373970_g8484_i0;Meteora_sporadica|NODE_10636_length_608_cov_22_608775_g8929_i0;Nebulomonas_marisrubri|TRINITY_DN13191_c0_g1_TRINITY_DN13191_c0_g1_i2_g_67312_m_67312;Nebulomonas_marisrubri|TRINITY_DN34211_c0_g1_TRINITY_DN34211_c0_g1_i1_g_41226_m_41226;Nibb…
cluster1011	GO:0006357; P:regulation of transcription by RNA polymerase II; ISO:PomBase	18	O13870	Ancoracysta_twista|GFYU01004702_1_p1;Hemimastix_kukwesjijk|EP00696_Hemimastix_kukwesjijk_P011515;Meteora_sporadica|NODE_12912_length_375_cov_110_356688_g11149_i0;Meteora_sporadica|NODE_7694_length_1032_cov_89_287333_g6329_i0;Nebulomonas_marisrubri|TRINITY_DN12532_c0_g1_TRINITY_DN12532_c0_g1_i1_g_40691_m_40691;Nibbleromonas_arcticus|TRINITY_DN3225_c0_g1_TRINITY_DN3225_c0_g1_i1_g_51929_m_51929;Nibb…
cluster1012	GO:0006659; P:phosphatidylserine biosynthetic process; IEA:EnsemblPlants	18	Q0JR55	Ancoracysta_twista|GFYU01004716_1_p2;Ancoracysta_twista|GFYU01004835_1_p1;Hemimastix_kukwesjijk|EP00696_Hemimastix_kukwesjijk_P020295;Meteora_sporadica|NODE_5803_length_1374_cov_7_677837_g4731_i0;Nebulomonas_marisrubri|TRINITY_DN13802_c2_g1_TRINITY_DN13802_c2_g1_i12_g_46049_m_46049;Nibbleromonas_arcticus|TRINITY_DN19058_c0_g1_TRINITY_DN19058_c0_g1_i1_g_23053_m_23053;Nibbleromonas_curacaus|TRINITY…
cluster1015	GO:0009733; P:response to auxin; IMP:TAIR	18	Q9FMA3	Ancoracysta_twista|GFYU01005229_1_p1;Ancoracysta_twista|GFYU01029444_1_p2;Hemimastix_kukwesjijk|EP00696_Hemimastix_kukwesjijk_P006385;Hemimastix_kukwesjijk|EP00696_Hemimastix_kukwesjijk_P018260;Hemimastix_kukwesjijk|EP00696_Hemimastix_kukwesjijk_P018261;Meteora_sporadica|NODE_11948_length_464_cov_17_359801_g10188_i0;Meteora_sporadica|NODE_8135_length_961_cov_12_726667_g6702_i0;Nebulomonas_marisru…
cluster1020	GO:0006325; P:chromatin organization; IMP:SGD	18	Q12447	Ancoracysta_twista|GFYU01006493_1_p1;Hemimastix_kukwesjijk|EP00696_Hemimastix_kukwesjijk_P008505;Hemimastix_kukwesjijk|EP00696_Hemimastix_kukwesjijk_P008741;Meteora_sporadica|NODE_1974_length_2818_cov_57_136380_g1606_i0;Meteora_sporadica|NODE_6742_length_1202_cov_53_109553_g5528_i0;Nebulomonas_marisrubri|TRINITY_DN11858_c0_g1_TRINITY_DN11858_c0_g1_i2_g_38326_m_38326;Nebulomonas_marisrubri|TRINITY…
cluster1021	GO:0046653; P:tetrahydrofolate metabolic process; ISO:MGI	18	A6H5Y3	Ancoracysta_twista|GFYU01006961_1_p1;Ancoracysta_twista|GFYU01020892_1_p2;Ancoracysta_twista|GFYU01021982_1_p1;Hemimastix_kukwesjijk|EP00696_Hemimastix_kukwesjijk_P020137;Meteora_sporadica|NODE_1035_length_3767_cov_11_738802_g846_i0;Nebulomonas_marisrubri|TRINITY_DN10336_c0_g1_TRINITY_DN10336_c0_g1_i1_g_91870_m_91870;Nibbleromonas_arcticus|TRINITY_DN9023_c0_g1_TRINITY_DN9023_c0_g1_i1_g_29849_m_29…
cluster1022	GO:0009408; P:response to heat; IEA:InterPro	18	P43644	Ancoracysta_twista|GFYU01007313_1_p1;Ancoracysta_twista|GFYU01008962_1_p1;Hemimastix_kukwesjijk|EP00696_Hemimastix_kukwesjijk_P003993;Meteora_sporadica|NODE_6786_length_1192_cov_40_192750_g5566_i0;Nebulomonas_marisrubri|TRINITY_DN13706_c2_g9_TRINITY_DN13706_c2_g9_i1_g_47570_m_47570;Nebulomonas_marisrubri|TRINITY_DN6655_c0_g1_TRINITY_DN6655_c0_g1_i1_g_28034_m_28034;Nibbleromonas_arcticus|TRINITY_D…
cluster1025	GO:0006435; P:threonyl-tRNA aminoacylation; IDA:UniProtKB	18	Q9D0R2	Ancoracysta_twista|GFYU01007596_1_p1;Hemimastix_kukwesjijk|EP00696_Hemimastix_kukwesjijk_P019576;Meteora_sporadica|NODE_2069_length_2761_cov_28_556296_g1684_i0;Meteora_sporadica|NODE_3295_length_2092_cov_98_339734_g2669_i0;Nebulomonas_marisrubri|TRINITY_DN12132_c0_g1_TRINITY_DN12132_c0_g1_i1_g_16745_m_16745;Nibbleromonas_arcticus|TRINITY_DN5149_c0_g1_TRINITY_DN5149_c0_g1_i1_g_51033_m_51033;Nibble…
cluster1026	N/A	18	Q86V87	Ancoracysta_twista|GFYU01008000_1_p1;Ancoracysta_twista|GFYU01015967_1_p1;Hemimastix_kukwesjijk|EP00696_Hemimastix_kukwesjijk_P001746;Hemimastix_kukwesjijk|EP00696_Hemimastix_kukwesjijk_P001747;Meteora_sporadica|NODE_2874_length_2281_cov_14_338288_g2327_i0;Nebulomonas_marisrubri|TRINITY_DN7648_c0_g2_TRINITY_DN7648_c0_g2_i1_g_14790_m_14790;Nibbleromonas_arcticus|TRINITY_DN28692_c0_g1_TRINITY_DN286…
cluster1030	GO:0006614; P:SRP-dependent cotranslational protein targeting to membrane; IEA:InterPro	18	Q20822	Ancoracysta_twista|GFYU01008673_1_p1;Ancoracysta_twista|GFYU01013870_1_p1;Hemimastix_kukwesjijk|EP00696_Hemimastix_kukwesjijk_P000363;Hemimastix_kukwesjijk|EP00696_Hemimastix_kukwesjijk_P000364;Meteora_sporadica|NODE_2814_length_2313_cov_73_352131_g2276_i0;Nebulomonas_marisrubri|TRINITY_DN2132_c0_g1_TRINITY_DN2132_c0_g1_i1_g_31771_m_31771;Nibbleromonas_arcticus|TRINITY_DN2_c0_g1_TRINITY_DN2_c0_g1…
cluster1033	GO:0016740; F:transferase activity; IEA:UniProtKB-KW	18	Q9ZCN4	Ancoracysta_twista|GFYU01009161_1_p2;Ancoracysta_twista|GFYU01026239_1_p1;Hemimastix_kukwesjijk|EP00696_Hemimastix_kukwesjijk_P002090;Meteora_sporadica|NODE_6521_length_1248_cov_16_462511_g5346_i0;Meteora_sporadica|NODE_7542_length_1062_cov_24_698302_g6199_i0;Meteora_sporadica|NODE_7843_length_1008_cov_7_473073_g6456_i0;Nebulomonas_marisrubri|TRINITY_DN3071_c0_g1_TRINITY_DN3071_c0_g1_i1_g_68359_m…
cluster1035	GO:0006751; P:glutathione catabolic process; IDA:SGD	18	P53871	Ancoracysta_twista|GFYU01009510_1_p1;Hemimastix_kukwesjijk|EP00696_Hemimastix_kukwesjijk_P007299;Hemimastix_kukwesjijk|EP00696_Hemimastix_kukwesjijk_P017060;Meteora_sporadica|NODE_4771_length_1611_cov_23_715484_g3866_i0;Meteora_sporadica|NODE_6442_length_1261_cov_16_295833_g3866_i1;Nebulomonas_marisrubri|TRINITY_DN4326_c0_g1_TRINITY_DN4326_c0_g1_i1_g_52499_m_52499;Nebulomonas_marisrubri|TRINITY_D…
cluster1037	GO:0032482; P:Rab protein signal transduction; IBA:GO_Central	18	Q0PD08	Ancoracysta_twista|GFYU01009811_1_p1;Hemimastix_kukwesjijk|EP00696_Hemimastix_kukwesjijk_P001878;Hemimastix_kukwesjijk|EP00696_Hemimastix_kukwesjijk_P014731;Hemimastix_kukwesjijk|EP00696_Hemimastix_kukwesjijk_P016469;Meteora_sporadica|NODE_3458_length_2033_cov_30_274848_g2795_i0;Meteora_sporadica|NODE_9387_length_765_cov_105_453125_g7797_i0;Nebulomonas_marisrubri|TRINITY_DN10175_c0_g1_TRINITY_DN1…
cluster1041	GO:0010119; P:regulation of stomatal movement; IMP:TAIR	18	Q949R9	Ancoracysta_twista|GFYU01010651_1_p1;Hemimastix_kukwesjijk|EP00696_Hemimastix_kukwesjijk_P008944;Hemimastix_kukwesjijk|EP00696_Hemimastix_kukwesjijk_P014439;Meteora_sporadica|NODE_12039_length_454_cov_4_982188_g10278_i0;Meteora_sporadica|NODE_12448_length_416_cov_58_814085_g10685_i0;Nebulomonas_marisrubri|TRINITY_DN5631_c0_g1_TRINITY_DN5631_c0_g1_i1_g_84733_m_84733;Nebulomonas_marisrubri|TRINITY_…
cluster1046	GO:0008380; P:RNA splicing; IEA:UniProtKB-KW	18	Q9CT49	Ancoracysta_twista|GFYU01011778_1_p1;Ancoracysta_twista|GFYU01037567_1_p1;Hemimastix_kukwesjijk|EP00696_Hemimastix_kukwesjijk_P014941;Hemimastix_kukwesjijk|EP00696_Hemimastix_kukwesjijk_P014942;Meteora_sporadica|NODE_4589_length_1659_cov_14_591364_g3714_i0;Nebulomonas_marisrubri|TRINITY_DN13718_c2_g2_TRINITY_DN13718_c2_g2_i1_g_46699_m_46699;Nibbleromonas_arcticus|TRINITY_DN22203_c0_g1_TRINITY_DN2…
cluster1051	GO:0000455; P:enzyme-directed rRNA pseudouridine synthesis; IBA:GO_Central	18	Q8IZ73	Ancoracysta_twista|GFYU01014964_1_p1;Ancoracysta_twista|GFYU01020695_1_p1;Hemimastix_kukwesjijk|EP00696_Hemimastix_kukwesjijk_P017172;Meteora_sporadica|NODE_9402_length_763_cov_30_813390_g7812_i0;Nebulomonas_marisrubri|TRINITY_DN14166_c3_g1_TRINITY_DN14166_c3_g1_i2_g_87709_m_87709;Nebulomonas_marisrubri|TRINITY_DN5028_c0_g1_TRINITY_DN5028_c0_g1_i1_g_65734_m_65734;Nibbleromonas_arcticus|TRINITY_DN…
cluster1054	GO:0006438; P:valyl-tRNA aminoacylation; ISS:dictyBase	18	Q86KU2	Ancoracysta_twista|GFYU01019514_1_p1;Hemimastix_kukwesjijk|EP00696_Hemimastix_kukwesjijk_P020004;Meteora_sporadica|NODE_1428_length_3249_cov_23_713927_g1169_i0;Meteora_sporadica|NODE_1701_length_3004_cov_8_796126_g1391_i0;Nebulomonas_marisrubri|TRINITY_DN12925_c0_g1_TRINITY_DN12925_c0_g1_i1_g_59583_m_59583;Nebulomonas_marisrubri|TRINITY_DN8623_c0_g1_TRINITY_DN8623_c0_g1_i2_g_61027_m_61027;Nibbler…
cluster1056	GO:0031119; P:tRNA pseudouridine synthesis; IDA:UniProtKB	18	Q9WU56	Ancoracysta_twista|GFYU01020149_1_p1;Ancoracysta_twista|GFYU01023154_1_p1;Ancoracysta_twista|GFYU01042887_1_p1;Hemimastix_kukwesjijk|EP00696_Hemimastix_kukwesjijk_P003419;Meteora_sporadica|NODE_10074_length_679_cov_11_190939_g8416_i0;Meteora_sporadica|NODE_4834_length_1597_cov_16_081380_g3916_i0;Nebulomonas_marisrubri|TRINITY_DN12073_c0_g2_TRINITY_DN12073_c0_g2_i1_g_29206_m_29206;Nebulomonas_mari…
cluster1062	GO:0008345; P:larval locomotory behavior; IMP:ZFIN	18	Q2YDP8	Ancoracysta_twista|GFYU01030039_1_p1;Hemimastix_kukwesjijk|EP00696_Hemimastix_kukwesjijk_P004211;Hemimastix_kukwesjijk|EP00696_Hemimastix_kukwesjijk_P006568;Meteora_sporadica|NODE_2712_length_2364_cov_8_790274_g2197_i0;Nebulomonas_marisrubri|TRINITY_DN11265_c0_g1_TRINITY_DN11265_c0_g1_i1_g_63008_m_63008;Nibbleromonas_arcticus|TRINITY_DN16529_c0_g1_TRINITY_DN16529_c0_g1_i1_g_47338_m_47338;Nibblero…
cluster1064	GO:0006574; P:valine catabolic process; IEA:UniProtKB-UniPathway	18	Q58EB4	Ancoracysta_twista|GFYU01031985_1_p1;Hemimastix_kukwesjijk|EP00696_Hemimastix_kukwesjijk_P011069;Hemimastix_kukwesjijk|EP00696_Hemimastix_kukwesjijk_P011070;Meteora_sporadica|NODE_4375_length_1717_cov_30_378019_g3542_i0;Meteora_sporadica|NODE_5457_length_1450_cov_6_293017_g4432_i0;Meteora_sporadica|NODE_5968_length_1347_cov_20_094090_g4871_i0;Nebulomonas_marisrubri|TRINITY_DN5258_c0_g1_TRINITY_DN…
cluster1068	GO:0007004; P:telomere maintenance via telomerase; IBA:GO_Central	18	Q9SKI4	Ancoracysta_twista|GFYU01036783_1_p2;Ancoracysta_twista|GFYU01047911_1_p1;Hemimastix_kukwesjijk|EP00696_Hemimastix_kukwesjijk_P002050;Meteora_sporadica|NODE_3480_length_2025_cov_48_854379_g2815_i0;Nebulomonas_marisrubri|TRINITY_DN10932_c0_g1_TRINITY_DN10932_c0_g1_i1_g_36324_m_36324;Nebulomonas_marisrubri|TRINITY_DN855_c0_g1_TRINITY_DN855_c0_g1_i1_g_78083_m_78083;Nibbleromonas_arcticus|TRINITY_DN5…
cluster1077	GO:0008235; F:metalloexopeptidase activity; IEA:InterPro	18	Q6NSR8	Ancoracysta_twista|GFYU01051703_1_p1;Ancoracysta_twista|GFYU01084177_1_p1;Hemimastix_kukwesjijk|EP00696_Hemimastix_kukwesjijk_P011750;Meteora_sporadica|NODE_4319_length_1733_cov_45_501196_g3502_i0;Nebulomonas_marisrubri|TRINITY_DN11200_c0_g1_TRINITY_DN11200_c0_g1_i2_g_66408_m_66408;Nebulomonas_marisrubri|TRINITY_DN11878_c0_g1_TRINITY_DN11878_c0_g1_i3_g_38207_m_38207;Nibbleromonas_arcticus|TRINITY…
cluster1104	GO:0006436; P:tryptophanyl-tRNA aminoacylation; IBA:GO_Central	17	P17248	Ancoracysta_twista|GFYU01000362_1_p1;Hemimastix_kukwesjijk|EP00696_Hemimastix_kukwesjijk_P007908;Hemimastix_kukwesjijk|EP00696_Hemimastix_kukwesjijk_P007909;Meteora_sporadica|NODE_5731_length_1390_cov_21_584650_g4670_i0;Nebulomonas_marisrubri|TRINITY_DN7483_c0_g1_TRINITY_DN7483_c0_g1_i2_g_48432_m_48432;Nebulomonas_marisrubri|TRINITY_DN7483_c0_g1_TRINITY_DN7483_c0_g1_i3_g_48435_m_48435;Nebulomonas…
cluster1105	GO:0006412; P:translation; IEA:InterPro	17	P42791	Ancoracysta_twista|GFYU01000415_1_p1;Hemimastix_kukwesjijk|EP00696_Hemimastix_kukwesjijk_P007836;Meteora_sporadica|NODE_6603_length_1229_cov_1460_446918_g5412_i0;Meteora_sporadica|NODE_7265_length_1104_cov_1915_868648_g5412_i1;Nebulomonas_marisrubri|TRINITY_DN11901_c0_g1_TRINITY_DN11901_c0_g1_i1_g_38356_m_38356;Nebulomonas_marisrubri|TRINITY_DN23145_c0_g1_TRINITY_DN23145_c0_g1_i1_g_3911_m_3911;Ni…
cluster1107	GO:0006412; P:translation; IEA:InterPro	17	P51418	Ancoracysta_twista|GFYU01000551_1_p1;Hemimastix_kukwesjijk|EP00696_Hemimastix_kukwesjijk_P003159;Meteora_sporadica|NODE_10285_length_651_cov_3408_467797_g8602_i0;Nebulomonas_marisrubri|TRINITY_DN33829_c0_g1_TRINITY_DN33829_c0_g1_i1_g_17311_m_17311;Nebulomonas_marisrubri|TRINITY_DN6302_c0_g1_TRINITY_DN6302_c0_g1_i1_g_69384_m_69384;Nebulomonas_marisrubri|TRINITY_DN6302_c0_g1_TRINITY_DN6302_c0_g1_i2…
cluster1111	GO:0050848; P:regulation of calcium-mediated signaling; IDA:UniProtKB	17	Q9HC24	Ancoracysta_twista|GFYU01000845_1_p1;Hemimastix_kukwesjijk|EP00696_Hemimastix_kukwesjijk_P015565;Meteora_sporadica|NODE_8578_length_887_cov_233_773608_g7088_i0;Nebulomonas_marisrubri|TRINITY_DN12425_c0_g1_TRINITY_DN12425_c0_g1_i2_g_36834_m_36834;Nibbleromonas_arcticus|TRINITY_DN15921_c0_g1_TRINITY_DN15921_c0_g1_i1_g_7112_m_7112;Nibbleromonas_arcticus|TRINITY_DN2283_c0_g1_TRINITY_DN2283_c0_g1_i1_g…
cluster1114	GO:0034727; P:piecemeal microautophagy of the nucleus; IBA:GO_Central	17	Q9UUA1	Ancoracysta_twista|GFYU01001423_1_p1;Ancoracysta_twista|GFYU01002686_1_p1;Hemimastix_kukwesjijk|EP00696_Hemimastix_kukwesjijk_P015557;Hemimastix_kukwesjijk|EP00696_Hemimastix_kukwesjijk_P015558;Meteora_sporadica|NODE_5374_length_1468_cov_173_464108_g4362_i0;Nebulomonas_marisrubri|TRINITY_DN1229_c0_g1_TRINITY_DN1229_c0_g1_i1_g_58684_m_58684;Nibbleromonas_arcticus|TRINITY_DN5670_c0_g1_TRINITY_DN567…
cluster1116	GO:0007608; P:sensory perception of smell; IMP:FlyBase	17	Q9V3D5	Ancoracysta_twista|GFYU01001735_1_p1;Hemimastix_kukwesjijk|EP00696_Hemimastix_kukwesjijk_P000283;Hemimastix_kukwesjijk|EP00696_Hemimastix_kukwesjijk_P006171;Meteora_sporadica|NODE_4219_length_1764_cov_17_297710_g3423_i0;Nebulomonas_marisrubri|TRINITY_DN13456_c0_g1_TRINITY_DN13456_c0_g1_i2_g_82552_m_82552;Nibbleromonas_arcticus|TRINITY_DN1770_c0_g1_TRINITY_DN1770_c0_g1_i1_g_44358_m_44358;Nibblerom…
cluster1121	GO:0019432; P:triglyceride biosynthetic process; ISS:UniProtKB	17	K7LC65	Ancoracysta_twista|GFYU01002009_1_p1;Hemimastix_kukwesjijk|EP00696_Hemimastix_kukwesjijk_P009199;Hemimastix_kukwesjijk|EP00696_Hemimastix_kukwesjijk_P019836;Meteora_sporadica|NODE_3332_length_2077_cov_53_235615_g821_i1;Meteora_sporadica|NODE_4950_length_1567_cov_52_332669_g4003_i0;Meteora_sporadica|NODE_6847_length_1182_cov_39_660125_g4003_i1;Nebulomonas_marisrubri|TRINITY_DN6259_c0_g1_TRINITY_DN…
cluster1122	GO:0016485; P:protein processing; TAS:TAIR	17	Q56Y85	Ancoracysta_twista|GFYU01002068_1_p1;Hemimastix_kukwesjijk|EP00696_Hemimastix_kukwesjijk_P005593;Hemimastix_kukwesjijk|EP00696_Hemimastix_kukwesjijk_P013112;Meteora_sporadica|NODE_5169_length_1511_cov_306_936552_g4194_i0;Nebulomonas_marisrubri|TRINITY_DN13708_c6_g2_TRINITY_DN13708_c6_g2_i5_g_46222_m_46222;Nibbleromonas_arcticus|TRINITY_DN27181_c0_g1_TRINITY_DN27181_c0_g1_i1_g_48446_m_48446;Nibble…
cluster1125	GO:0006906; P:vesicle fusion; ISS:UniProtKB	17	Q86AQ7	Ancoracysta_twista|GFYU01003286_1_p1;Hemimastix_kukwesjijk|EP00696_Hemimastix_kukwesjijk_P013726;Hemimastix_kukwesjijk|EP00696_Hemimastix_kukwesjijk_P013728;Hemimastix_kukwesjijk|EP00696_Hemimastix_kukwesjijk_P018598;Meteora_sporadica|NODE_9070_length_807_cov_162_512064_g7515_i0;Nebulomonas_marisrubri|TRINITY_DN2020_c0_g1_TRINITY_DN2020_c0_g1_i1_g_76591_m_76591;Nebulomonas_marisrubri|TRINITY_DN55…
cluster1126	GO:0003774; F:motor activity; IEA:UniProtKB-KW	17	Q39584	Ancoracysta_twista|GFYU01003441_1_p2;Ancoracysta_twista|GFYU01005181_1_p1;Ancoracysta_twista|GFYU01014977_1_p1;Hemimastix_kukwesjijk|EP00696_Hemimastix_kukwesjijk_P003273;Meteora_sporadica|NODE_716_length_4397_cov_57_654751_g585_i0;Meteora_sporadica|NODE_9496_length_750_cov_72_206096_g7897_i0;Nebulomonas_marisrubri|TRINITY_DN152_c0_g1_TRINITY_DN152_c0_g1_i1_g_3_m_3;Nebulomonas_marisrubri|TRINITY_…
cluster1130	GO:0016021; C:integral component of membrane; IEA:UniProtKB-KW	17	Q54RJ1	Ancoracysta_twista|GFYU01004940_1_p1;Ancoracysta_twista|GFYU01023804_1_p1;Ancoracysta_twista|GFYU01067720_1_p2;Hemimastix_kukwesjijk|EP00696_Hemimastix_kukwesjijk_P015269;Meteora_sporadica|NODE_2920_length_2256_cov_132_572210_g2367_i0;Nebulomonas_marisrubri|TRINITY_DN4389_c0_g1_TRINITY_DN4389_c0_g1_i1_g_52684_m_52684;Nebulomonas_marisrubri|TRINITY_DN9202_c0_g1_TRINITY_DN9202_c0_g1_i1_g_33218_m_33…
cluster1131	GO:0032482; P:Rab protein signal transduction; IBA:GO_Central	17	Q55FU9	Ancoracysta_twista|GFYU01005308_1_p1;Hemimastix_kukwesjijk|EP00696_Hemimastix_kukwesjijk_P006469;Meteora_sporadica|NODE_9136_length_800_cov_44_181326_g7573_i0;Nebulomonas_marisrubri|TRINITY_DN11386_c0_g1_TRINITY_DN11386_c0_g1_i1_g_38928_m_38928;Nibbleromonas_arcticus|TRINITY_DN3508_c0_g1_TRINITY_DN3508_c0_g1_i1_g_29511_m_29511;Nibbleromonas_curacaus|TRINITY_DN46084_c0_g1_TRINITY_DN46084_c0_g1_i1_…
cluster1133	GO:0006644; P:phospholipid metabolic process; IBA:GO_Central	17	Q9LHN4	Ancoracysta_twista|GFYU01005616_1_p1;Hemimastix_kukwesjijk|EP00696_Hemimastix_kukwesjijk_P020286;Meteora_sporadica|NODE_7133_length_1129_cov_42_270599_g5857_i0;Meteora_sporadica|NODE_8644_length_877_cov_33_840686_g5857_i1;Nebulomonas_marisrubri|TRINITY_DN1979_c0_g1_TRINITY_DN1979_c0_g1_i1_g_49839_m_49839;Nibbleromonas_arcticus|TRINITY_DN16454_c0_g1_TRINITY_DN16454_c0_g1_i1_g_3908_m_3908;Nibblerom…
cluster1146	GO:0000398; P:mRNA splicing, via spliceosome; ISS:dictyBase	17	Q54BM5	Ancoracysta_twista|GFYU01007011_1_p1;Hemimastix_kukwesjijk|EP00696_Hemimastix_kukwesjijk_P008943;Meteora_sporadica|NODE_5212_length_1501_cov_75_400694_g4227_i0;Meteora_sporadica|NODE_7256_length_1105_cov_152_644636_g4227_i1;Nebulomonas_marisrubri|TRINITY_DN9316_c0_g1_TRINITY_DN9316_c0_g1_i1_g_50779_m_50779;Nibbleromonas_arcticus|TRINITY_DN10607_c0_g1_TRINITY_DN10607_c0_g1_i1_g_17129_m_17129;Nibbl…
cluster1151	GO:0045454; P:cell redox homeostasis; IEA:InterPro	17	Q942L2	Ancoracysta_twista|GFYU01007701_1_p2;Hemimastix_kukwesjijk|EP00696_Hemimastix_kukwesjijk_P002790;Meteora_sporadica|NODE_11277_length_534_cov_66_052854_g805_i1;Meteora_sporadica|NODE_6659_length_1219_cov_329_028497_g5461_i0;Nebulomonas_marisrubri|TRINITY_DN32146_c0_g1_TRINITY_DN32146_c0_g1_i1_g_66024_m_66024;Nebulomonas_marisrubri|TRINITY_DN7187_c0_g1_TRINITY_DN7187_c0_g1_i1_g_83474_m_83474;Nibble…
cluster1155	GO:0006099; P:tricarboxylic acid cycle; IEA:UniProtKB-UniRule	17	Q55AI5	Ancoracysta_twista|GFYU01008219_1_p1;Hemimastix_kukwesjijk|EP00696_Hemimastix_kukwesjijk_P010063;Meteora_sporadica|NODE_4967_length_1563_cov_23_145806_g4016_i0;Nebulomonas_marisrubri|TRINITY_DN5264_c0_g1_TRINITY_DN5264_c0_g1_i1_g_51340_m_51340;Nebulomonas_marisrubri|TRINITY_DN6921_c0_g1_TRINITY_DN6921_c0_g1_i1_g_24319_m_24319;Nibbleromonas_arcticus|TRINITY_DN22615_c0_g1_TRINITY_DN22615_c0_g1_i1_g…
cluster1158	GO:0006606; P:protein import into nucleus; IBA:GO_Central	17	F4J738	Ancoracysta_twista|GFYU01008639_1_p1;Ancoracysta_twista|GFYU01014492_1_p1;Ancoracysta_twista|GFYU01015325_1_p1;Ancoracysta_twista|GFYU01015588_1_p1;Hemimastix_kukwesjijk|EP00696_Hemimastix_kukwesjijk_P002076;Meteora_sporadica|NODE_571_length_4811_cov_29_271158_g472_i0;Nebulomonas_marisrubri|TRINITY_DN13551_c2_g4_TRINITY_DN13551_c2_g4_i1_g_90508_m_90508;Nibbleromonas_arcticus|TRINITY_DN16165_c0_g1…
cluster1162	GO:0006366; P:transcription by RNA polymerase II; IBA:GO_Central	17	Q8W4M7	Ancoracysta_twista|GFYU01010204_1_p1;Ancoracysta_twista|GFYU01031677_1_p1;Ancoracysta_twista|GFYU01077190_1_p1;Hemimastix_kukwesjijk|EP00696_Hemimastix_kukwesjijk_P017734;Hemimastix_kukwesjijk|EP00696_Hemimastix_kukwesjijk_P017735;Meteora_sporadica|NODE_2521_length_2465_cov_8_103577_g2042_i0;Nebulomonas_marisrubri|TRINITY_DN4796_c0_g1_TRINITY_DN4796_c0_g1_i1_g_50150_m_50150;Nibbleromonas_arcticus…
cluster1164	GO:0051561; P:positive regulation of mitochondrial calcium ion concentration; ISS:UniProtKB	17	B1H2N3	Ancoracysta_twista|GFYU01010846_1_p1;Ancoracysta_twista|GFYU01025060_1_p1;Hemimastix_kukwesjijk|EP00696_Hemimastix_kukwesjijk_P011864;Meteora_sporadica|NODE_5623_length_1414_cov_119_166297_g4572_i0;Nebulomonas_marisrubri|TRINITY_DN13497_c2_g1_TRINITY_DN13497_c2_g1_i1_g_81676_m_81676;Nibbleromonas_arcticus|TRINITY_DN2115_c0_g1_TRINITY_DN2115_c0_g1_i1_g_20638_m_20638;Nibbleromonas_arcticus|TRINITY_…
cluster1194	GO:0035886; P:vascular smooth muscle cell differentiation; IEA:Ensembl	17	Q8C9X6	Ancoracysta_twista|GFYU01028315_1_p1;Ancoracysta_twista|GFYU01042255_1_p1;Hemimastix_kukwesjijk|EP00696_Hemimastix_kukwesjijk_P001549;Meteora_sporadica|NODE_4458_length_1695_cov_26_559976_g3612_i0;Nebulomonas_marisrubri|TRINITY_DN10154_c0_g1_TRINITY_DN10154_c0_g1_i1_g_33903_m_33903;Nibbleromonas_arcticus|TRINITY_DN257_c0_g1_TRINITY_DN257_c0_g1_i1_g_3040_m_3040;Nibbleromonas_arcticus|TRINITY_DN496…
cluster1195	GO:0016079; P:synaptic vesicle exocytosis; IMP:FlyBase	17	P29742	Ancoracysta_twista|GFYU01030943_1_p1;Ancoracysta_twista|GFYU01069772_1_p1;Ancoracysta_twista|GFYU01080113_1_p1;Hemimastix_kukwesjijk|EP00696_Hemimastix_kukwesjijk_P007312;Hemimastix_kukwesjijk|EP00696_Hemimastix_kukwesjijk_P007313;Meteora_sporadica|NODE_445_length_5301_cov_138_942176_g369_i0;Nebulomonas_marisrubri|TRINITY_DN12282_c0_g1_TRINITY_DN12282_c0_g1_i1_g_35119_m_35119;Nibbleromonas_arctic…
cluster1199	GO:0070979; P:protein K11-linked ubiquitination; ISS:UniProtKB	17	Q8R349	Ancoracysta_twista|GFYU01042048_1_p1;Ancoracysta_twista|GFYU01088301_1_p1;Ancoracysta_twista|GFYU01090367_1_p1;Hemimastix_kukwesjijk|EP00696_Hemimastix_kukwesjijk_P018059;Meteora_sporadica|NODE_4558_length_1669_cov_5_741294_g3691_i0;Nebulomonas_marisrubri|TRINITY_DN12499_c0_g1_TRINITY_DN12499_c0_g1_i2_g_36631_m_36631;Nibbleromonas_arcticus|TRINITY_DN24348_c0_g1_TRINITY_DN24348_c0_g1_i1_g_17791_m_…
cluster1207	GO:0009243; P:O antigen biosynthetic process; IEA:UniProtKB-UniPathway	17	P26402	Ancoracysta_twista|GFYU01067190_1_p1;Hemimastix_kukwesjijk|EP00696_Hemimastix_kukwesjijk_P009646;Meteora_sporadica|NODE_3258_length_2106_cov_17_251345_g2641_i0;Meteora_sporadica|NODE_3468_length_2030_cov_17_714068_g2641_i1;Nebulomonas_marisrubri|TRINITY_DN41202_c0_g1_TRINITY_DN41202_c0_g1_i1_g_36542_m_36542;Nebulomonas_marisrubri|TRINITY_DN9417_c0_g1_TRINITY_DN9417_c0_g1_i1_g_64409_m_64409;Nibble…
cluster1212	GO:2000535; P:regulation of entry of bacterium into host cell; ISO:MGI	17	Q9D4H1	Ancoracysta_twista|GFYU01085125_1_p1;Hemimastix_kukwesjijk|EP00696_Hemimastix_kukwesjijk_P012278;Meteora_sporadica|NODE_1485_length_3204_cov_12_665606_g1215_i0;Nebulomonas_marisrubri|TRINITY_DN3126_c0_g1_TRINITY_DN3126_c0_g1_i1_g_83724_m_83724;Nebulomonas_marisrubri|TRINITY_DN944_c0_g1_TRINITY_DN944_c0_g1_i1_g_42279_m_42279;Nibbleromonas_arcticus|TRINITY_DN5873_c0_g1_TRINITY_DN5873_c0_g1_i1_g_435…
cluster1236	GO:0015031; P:protein transport; IEA:UniProtKB-KW	16	P36863	Ancoracysta_twista|GFYU01000079_1_p1;Ancoracysta_twista|GFYU01000343_1_p1;Hemimastix_kukwesjijk|EP00696_Hemimastix_kukwesjijk_P016627;Hemimastix_kukwesjijk|EP00696_Hemimastix_kukwesjijk_P017697;Meteora_sporadica|NODE_8796_length_853_cov_132_573232_g7272_i0;Meteora_sporadica|NODE_9561_length_741_cov_49_092647_g7950_i0;Nebulomonas_marisrubri|TRINITY_DN10727_c0_g1_TRINITY_DN10727_c0_g1_i1_g_41469_m_…
cluster1242	GO:0006412; P:translation; IEA:InterPro	16	Q9C514	Ancoracysta_twista|GFYU01000676_1_p2;Ancoracysta_twista|GFYU01071326_1_p1;Hemimastix_kukwesjijk|EP00696_Hemimastix_kukwesjijk_P016558;Meteora_sporadica|NODE_11899_length_468_cov_1719_855037_g10141_i0;Meteora_sporadica|NODE_5166_length_1512_cov_1462_112336_g4191_i0;Nebulomonas_marisrubri|TRINITY_DN23702_c0_g1_TRINITY_DN23702_c0_g1_i1_g_16434_m_16434;Nebulomonas_marisrubri|TRINITY_DN30062_c0_g1_TRI…
cluster1246	GO:0006412; P:translation; IEA:InterPro	16	Q90YR8	Ancoracysta_twista|GFYU01000873_1_p1;Hemimastix_kukwesjijk|EP00696_Hemimastix_kukwesjijk_P003719;Meteora_sporadica|NODE_4613_length_1652_cov_1472_297926_g3736_i0;Meteora_sporadica|NODE_5484_length_1443_cov_1877_957308_g3736_i1;Nebulomonas_marisrubri|TRINITY_DN23526_c1_g1_TRINITY_DN23526_c1_g1_i1_g_69301_m_69301;Nebulomonas_marisrubri|TRINITY_DN30481_c0_g1_TRINITY_DN30481_c0_g1_i1_g_17803_m_17803;…
cluster1250	GO:0006334; P:nucleosome assembly; IEA:InterPro	16	B8AW64	Ancoracysta_twista|GFYU01000925_1_p1;Hemimastix_kukwesjijk|EP00696_Hemimastix_kukwesjijk_P012672;Hemimastix_kukwesjijk|EP00696_Hemimastix_kukwesjijk_P012673;Hemimastix_kukwesjijk|EP00696_Hemimastix_kukwesjijk_P017917;Meteora_sporadica|NODE_5682_length_1400_cov_46_835698_g4624_i0;Nebulomonas_marisrubri|TRINITY_DN12899_c0_g1_TRINITY_DN12899_c0_g1_i2_g_5891_m_5891;Nibbleromonas_arcticus|TRINITY_DN25…
cluster1251	GO:0006412; P:translation; TAS:ProtInc	16	Q13310	Ancoracysta_twista|GFYU01001002_1_p1;Hemimastix_kukwesjijk|EP00696_Hemimastix_kukwesjijk_P002600;Hemimastix_kukwesjijk|EP00696_Hemimastix_kukwesjijk_P002601;Meteora_sporadica|NODE_2796_length_2320_cov_2754_942452_g2261_i0;Meteora_sporadica|NODE_3489_length_2022_cov_3210_399286_g2261_i1;Nebulomonas_marisrubri|TRINITY_DN13778_c5_g3_TRINITY_DN13778_c5_g3_i2_g_47471_m_47471;Nibbleromonas_arcticus|TRI…
cluster1253	GO:0009070; P:serine family amino acid biosynthetic process; ISS:dictyBase	16	Q54UH8	Ancoracysta_twista|GFYU01001090_1_p1;Ancoracysta_twista|GFYU01028415_1_p1;Hemimastix_kukwesjijk|EP00696_Hemimastix_kukwesjijk_P000655;Meteora_sporadica|NODE_5569_length_1426_cov_32_460073_g4528_i0;Meteora_sporadica|NODE_6349_length_1276_cov_45_433745_g5200_i0;Nebulomonas_marisrubri|TRINITY_DN11708_c0_g1_TRINITY_DN11708_c0_g1_i1_g_25480_m_25480;Nebulomonas_marisrubri|TRINITY_DN4199_c0_g1_TRINITY_D…
cluster1255	GO:0032482; P:Rab protein signal transduction; IBA:GO_Central	16	Q86JP3	Ancoracysta_twista|GFYU01001194_1_p1;Ancoracysta_twista|GFYU01013247_1_p1;Hemimastix_kukwesjijk|EP00696_Hemimastix_kukwesjijk_P010315;Meteora_sporadica|NODE_9420_length_760_cov_113_226037_g7828_i0;Nebulomonas_marisrubri|TRINITY_DN1644_c0_g1_TRINITY_DN1644_c0_g1_i1_g_79220_m_79220;Nebulomonas_marisrubri|TRINITY_DN6858_c0_g1_TRINITY_DN6858_c0_g1_i1_g_26991_m_26991;Nibbleromonas_arcticus|TRINITY_DN9…
cluster1256	GO:0006412; P:translation; IEA:InterPro	16	Q9LYK9	Ancoracysta_twista|GFYU01001253_1_p2;Hemimastix_kukwesjijk|EP00696_Hemimastix_kukwesjijk_P007958;Meteora_sporadica|NODE_11728_length_483_cov_4587_364929_g9972_i0;Nebulomonas_marisrubri|TRINITY_DN14033_c6_g4_TRINITY_DN14033_c6_g4_i2_g_1892_m_1892;Nebulomonas_marisrubri|TRINITY_DN27472_c0_g1_TRINITY_DN27472_c0_g1_i1_g_41403_m_41403;Nibbleromonas_arcticus|TRINITY_DN15313_c0_g1_TRINITY_DN15313_c0_g1_…
cluster1257	GO:0006635; P:fatty acid beta-oxidation; IBA:GO_Central	16	Q9FIK7	Ancoracysta_twista|GFYU01001263_1_p1;Ancoracysta_twista|GFYU01002827_1_p1;Hemimastix_kukwesjijk|EP00696_Hemimastix_kukwesjijk_P005878;Meteora_sporadica|NODE_5287_length_1486_cov_88_920702_g4290_i0;Nebulomonas_marisrubri|TRINITY_DN11244_c0_g1_TRINITY_DN11244_c0_g1_i1_g_63272_m_63272;Nibbleromonas_arcticus|TRINITY_DN16037_c0_g1_TRINITY_DN16037_c0_g1_i1_g_22728_m_22728;Nibbleromonas_arcticus|TRINITY…
cluster1261	GO:0006452; P:translational frameshifting; IEA:InterPro	16	Q9AXJ4	Ancoracysta_twista|GFYU01001789_1_p1;Hemimastix_kukwesjijk|EP00696_Hemimastix_kukwesjijk_P002764;Hemimastix_kukwesjijk|EP00696_Hemimastix_kukwesjijk_P003964;Meteora_sporadica|NODE_10631_length_608_cov_3927_742230_g8924_i0;Nebulomonas_marisrubri|TRINITY_DN22546_c0_g1_TRINITY_DN22546_c0_g1_i1_g_47842_m_47842;Nebulomonas_marisrubri|TRINITY_DN27693_c0_g1_TRINITY_DN27693_c0_g1_i1_g_5072_m_5072;Nibbler…
cluster1272	GO:0006610; P:ribosomal protein import into nucleus; IBA:GO_Central	16	O60100	Ancoracysta_twista|GFYU01003852_1_p1;Ancoracysta_twista|GFYU01006551_1_p1;Hemimastix_kukwesjijk|EP00696_Hemimastix_kukwesjijk_P000568;Hemimastix_kukwesjijk|EP00696_Hemimastix_kukwesjijk_P000817;Meteora_sporadica|NODE_1961_length_2829_cov_3_858020_g1593_i0;Nebulomonas_marisrubri|TRINITY_DN11041_c0_g1_TRINITY_DN11041_c0_g1_i1_g_48742_m_48742;Nibbleromonas_arcticus|TRINITY_DN17044_c0_g1_TRINITY_DN17…
cluster1278	GO:0031098; P:stress-activated protein kinase signaling cascade; IBA:GO_Central	16	Q55GV3	Ancoracysta_twista|GFYU01004915_1_p1;Hemimastix_kukwesjijk|EP00696_Hemimastix_kukwesjijk_P007077;Hemimastix_kukwesjijk|EP00696_Hemimastix_kukwesjijk_P007078;Meteora_sporadica|NODE_4906_length_1577_cov_361_102243_g3968_i0;Nebulomonas_marisrubri|TRINITY_DN9298_c0_g1_TRINITY_DN9298_c0_g1_i1_g_11051_m_11051;Nibbleromonas_arcticus|TRINITY_DN22700_c0_g1_TRINITY_DN22700_c0_g1_i1_g_7642_m_7642;Nibbleromo…
cluster1284	GO:0006388; P:tRNA splicing, via endonucleolytic cleavage and ligation; IBA:GO_Central	16	A7RKF6	Ancoracysta_twista|GFYU01005579_1_p1;Hemimastix_kukwesjijk|EP00696_Hemimastix_kukwesjijk_P008749;Meteora_sporadica|NODE_1510_length_3173_cov_103_201799_g1235_i0;Nebulomonas_marisrubri|TRINITY_DN8202_c0_g1_TRINITY_DN8202_c0_g1_i1_g_28546_m_28546;Nebulomonas_marisrubri|TRINITY_DN8202_c0_g1_TRINITY_DN8202_c0_g1_i2_g_28548_m_28548;Nibbleromonas_arcticus|TRINITY_DN3643_c0_g1_TRINITY_DN3643_c0_g1_i1_g_…
cluster1288	GO:0006417; P:regulation of translation; IEA:UniProtKB-KW	16	Q8NEJ9	Ancoracysta_twista|GFYU01005795_1_p1;Ancoracysta_twista|GFYU01007862_1_p1;Hemimastix_kukwesjijk|EP00696_Hemimastix_kukwesjijk_P016453;Meteora_sporadica|NODE_11715_length_485_cov_4_808962_g9959_i0;Meteora_sporadica|NODE_13706_length_321_cov_5_461538_g11943_i0;Nebulomonas_marisrubri|TRINITY_DN8064_c0_g1_TRINITY_DN8064_c0_g1_i1_g_25044_m_25044;Nebulomonas_marisrubri|TRINITY_DN8064_c0_g1_TRINITY_DN80…
cluster1289	GO:0000245; P:spliceosomal complex assembly; IBA:GO_Central	16	O75533	Ancoracysta_twista|GFYU01005806_1_p1;Ancoracysta_twista|GFYU01027930_1_p1;Hemimastix_kukwesjijk|EP00696_Hemimastix_kukwesjijk_P019788;Meteora_sporadica|NODE_1098_length_3669_cov_46_433204_g898_i0;Nebulomonas_marisrubri|TRINITY_DN13339_c0_g1_TRINITY_DN13339_c0_g1_i2_g_75618_m_75618;Nebulomonas_marisrubri|TRINITY_DN13339_c0_g1_TRINITY_DN13339_c0_g1_i3_g_75625_m_75625;Nibbleromonas_arcticus|TRINITY_…
cluster1301	GO:0006508; P:proteolysis; IBA:GO_Central	16	Q1JPJ8	Ancoracysta_twista|GFYU01007368_1_p1;Hemimastix_kukwesjijk|EP00696_Hemimastix_kukwesjijk_P007533;Meteora_sporadica|NODE_1152_length_3596_cov_76_669873_g797_i1;Nebulomonas_marisrubri|TRINITY_DN13201_c0_g1_TRINITY_DN13201_c0_g1_i1_g_67174_m_67174;Nebulomonas_marisrubri|TRINITY_DN5776_c0_g1_TRINITY_DN5776_c0_g1_i1_g_16132_m_16132;Nibbleromonas_arcticus|TRINITY_DN17558_c0_g1_TRINITY_DN17558_c0_g1_i1_…
cluster1306	GO:0006457; P:protein folding; ISS:UniProtKB	16	Q8BK64	Ancoracysta_twista|GFYU01008154_1_p1;Ancoracysta_twista|GFYU01008463_1_p2;Ancoracysta_twista|GFYU01008470_1_p1;Hemimastix_kukwesjijk|EP00696_Hemimastix_kukwesjijk_P018685;Meteora_sporadica|NODE_12127_length_445_cov_39_721354_g10366_i0;Nebulomonas_marisrubri|TRINITY_DN9475_c0_g1_TRINITY_DN9475_c0_g1_i2_g_64258_m_64258;Nibbleromonas_arcticus|TRINITY_DN22860_c0_g1_TRINITY_DN22860_c0_g1_i1_g_41307_m_…
cluster1311	GO:0034975; P:protein folding in endoplasmic reticulum; IBA:GO_Central	16	Q5ZL00	Ancoracysta_twista|GFYU01009223_1_p1;Hemimastix_kukwesjijk|EP00696_Hemimastix_kukwesjijk_P017773;Meteora_sporadica|NODE_1765_length_2962_cov_24_310927_g1445_i0;Nebulomonas_marisrubri|TRINITY_DN10142_c0_g1_TRINITY_DN10142_c0_g1_i1_g_33996_m_33996;Nebulomonas_marisrubri|TRINITY_DN7904_c0_g1_TRINITY_DN7904_c0_g1_i1_g_5574_m_5574;Nibbleromonas_arcticus|TRINITY_DN10465_c0_g1_TRINITY_DN10465_c0_g1_i1_g…
cluster1317	GO:0016491; F:oxidoreductase activity; IBA:GO_Central	16	P80874	Ancoracysta_twista|GFYU01010376_1_p1;Ancoracysta_twista|GFYU01020408_1_p1;Hemimastix_kukwesjijk|EP00696_Hemimastix_kukwesjijk_P009427;Meteora_sporadica|NODE_7124_length_1130_cov_82_608980_g5849_i0;Meteora_sporadica|NODE_7440_length_1079_cov_56_155206_g6109_i0;Nebulomonas_marisrubri|TRINITY_DN13107_c0_g3_TRINITY_DN13107_c0_g3_i1_g_67941_m_67941;Nibbleromonas_arcticus|TRINITY_DN9683_c0_g1_TRINITY_D…
cluster1321	GO:0016192; P:vesicle-mediated transport; ISO:MGI	16	Q9D2N9	Ancoracysta_twista|GFYU01011698_1_p1;Ancoracysta_twista|GFYU01028126_1_p1;Hemimastix_kukwesjijk|EP00696_Hemimastix_kukwesjijk_P002729;Hemimastix_kukwesjijk|EP00696_Hemimastix_kukwesjijk_P015912;Hemimastix_kukwesjijk|EP00696_Hemimastix_kukwesjijk_P015922;Meteora_sporadica|NODE_4078_length_1803_cov_55_948909_g3309_i0;Nebulomonas_marisrubri|TRINITY_DN14218_c4_g1_TRINITY_DN14218_c4_g1_i1_g_22389_m_22…
cluster1331	GO:0006364; P:rRNA processing; ISS:dictyBase	16	Q54VF1	Ancoracysta_twista|GFYU01016761_1_p1;Ancoracysta_twista|GFYU01024046_1_p1;Hemimastix_kukwesjijk|EP00696_Hemimastix_kukwesjijk_P007740;Hemimastix_kukwesjijk|EP00696_Hemimastix_kukwesjijk_P007741;Hemimastix_kukwesjijk|EP00696_Hemimastix_kukwesjijk_P007742;Meteora_sporadica|NODE_7458_length_1076_cov_10_848276_g6126_i0;Meteora_sporadica|NODE_9382_length_766_cov_9_832624_g7792_i0;Nebulomonas_marisrubr…
cluster1342	GO:0042147; P:retrograde transport, endosome to Golgi; ISS:dictyBase	16	Q55CA0	Ancoracysta_twista|GFYU01022220_1_p1;Hemimastix_kukwesjijk|EP00696_Hemimastix_kukwesjijk_P007518;Hemimastix_kukwesjijk|EP00696_Hemimastix_kukwesjijk_P007519;Hemimastix_kukwesjijk|EP00696_Hemimastix_kukwesjijk_P009245;Meteora_sporadica|NODE_7642_length_1040_cov_50_960163_g6283_i0;Nebulomonas_marisrubri|TRINITY_DN7491_c0_g1_TRINITY_DN7491_c0_g1_i1_g_48555_m_48555;Nebulomonas_marisrubri|TRINITY_DN74…
cluster1348	GO:0006610; P:ribosomal protein import into nucleus; IBA:GO_Central	16	Q99LG2	Ancoracysta_twista|GFYU01029982_1_p1;Ancoracysta_twista|GFYU01041540_1_p1;Ancoracysta_twista|GFYU01045928_1_p1;Ancoracysta_twista|GFYU01067719_1_p1;Hemimastix_kukwesjijk|EP00696_Hemimastix_kukwesjijk_P003863;Meteora_sporadica|NODE_1996_length_2808_cov_25_497634_g1624_i0;Nebulomonas_marisrubri|TRINITY_DN9847_c0_g1_TRINITY_DN9847_c0_g1_i1_g_7463_m_7463;Nibbleromonas_arcticus|TRINITY_DN10261_c0_g1_T…
cluster1353	GO:0046777; P:protein autophosphorylation; IDA:TAIR	16	P51567	Ancoracysta_twista|GFYU01032669_1_p1;Hemimastix_kukwesjijk|EP00696_Hemimastix_kukwesjijk_P015421;Meteora_sporadica|NODE_2916_length_2258_cov_17_272189_g2363_i0;Meteora_sporadica|NODE_4293_length_1738_cov_4_772809_g3481_i0;Nebulomonas_marisrubri|TRINITY_DN11977_c0_g1_TRINITY_DN11977_c0_g1_i2_g_15364_m_15364;Nebulomonas_marisrubri|TRINITY_DN7571_c0_g1_TRINITY_DN7571_c0_g1_i1_g_80319_m_80319;Nibbler…
cluster1371	GO:0016032; P:viral process; TAS:Reactome	16	O75694	Ancoracysta_twista|GFYU01089415_1_p3;Hemimastix_kukwesjijk|EP00696_Hemimastix_kukwesjijk_P004481;Hemimastix_kukwesjijk|EP00696_Hemimastix_kukwesjijk_P004482;Meteora_sporadica|NODE_823_length_4136_cov_11_224049_g674_i0;Nebulomonas_marisrubri|TRINITY_DN7480_c0_g1_TRINITY_DN7480_c0_g1_i1_g_48309_m_48309;Nibbleromonas_arcticus|TRINITY_DN6054_c0_g1_TRINITY_DN6054_c0_g1_i1_g_45219_m_45219;Nibbleromonas…
cluster1397	GO:0015031; P:protein transport; IEA:UniProtKB-KW	15	Q8H715	Ancoracysta_twista|GFYU01000013_1_p1;Hemimastix_kukwesjijk|EP00696_Hemimastix_kukwesjijk_P004322;Hemimastix_kukwesjijk|EP00696_Hemimastix_kukwesjijk_P011395;Hemimastix_kukwesjijk|EP00696_Hemimastix_kukwesjijk_P015862;Meteora_sporadica|NODE_4428_length_1702_cov_354_553931_g119_i1;Meteora_sporadica|NODE_6741_length_1202_cov_381_044698_g119_i2;Nebulomonas_marisrubri|TRINITY_DN6523_c0_g1_TRINITY_DN65…
cluster1401	GO:0008233; F:peptidase activity; IEA:UniProtKB-KW	15	Q9CQT7	Ancoracysta_twista|GFYU01000245_1_p1;Hemimastix_kukwesjijk|EP00696_Hemimastix_kukwesjijk_P008135;Meteora_sporadica|NODE_12364_length_424_cov_21_462810_g10601_i0;Meteora_sporadica|NODE_4168_length_1779_cov_89_073341_g3384_i0;Meteora_sporadica|NODE_5079_length_1537_cov_94_996612_g3384_i1;Nebulomonas_marisrubri|TRINITY_DN9089_c0_g1_TRINITY_DN9089_c0_g1_i1_g_43159_m_43159;Nibbleromonas_arcticus|TRINI…
cluster1402	GO:0006412; P:translation; IEA:InterPro	15	Q4PMB3	Ancoracysta_twista|GFYU01000358_1_p1;Ancoracysta_twista|GFYU01002064_1_p2;Hemimastix_kukwesjijk|EP00696_Hemimastix_kukwesjijk_P019950;Meteora_sporadica|NODE_4474_length_1691_cov_2058_430675_g3625_i0;Meteora_sporadica|NODE_8351_length_924_cov_3908_823870_g3625_i1;Nebulomonas_marisrubri|TRINITY_DN38580_c0_g1_TRINITY_DN38580_c0_g1_i1_g_51742_m_51742;Nebulomonas_marisrubri|TRINITY_DN5947_c1_g1_TRINIT…
cluster1404	GO:0035435; P:phosphate ion transmembrane transport; IDA:SGD	15	P23641	Ancoracysta_twista|GFYU01000378_1_p2;Ancoracysta_twista|GFYU01007251_1_p1;Ancoracysta_twista|GFYU01009665_1_p3;Hemimastix_kukwesjijk|EP00696_Hemimastix_kukwesjijk_P000211;Meteora_sporadica|NODE_7609_length_1047_cov_98_932049_g6253_i0;Nebulomonas_marisrubri|TRINITY_DN10174_c0_g1_TRINITY_DN10174_c0_g1_i1_g_33990_m_33990;Nebulomonas_marisrubri|TRINITY_DN8256_c0_g1_TRINITY_DN8256_c0_g1_i1_g_11660_m_1…
cluster1405	GO:0006412; P:translation; IEA:InterPro	15	P46793	Ancoracysta_twista|GFYU01000561_1_p1;Hemimastix_kukwesjijk|EP00696_Hemimastix_kukwesjijk_P018686;Hemimastix_kukwesjijk|EP00696_Hemimastix_kukwesjijk_P018687;Meteora_sporadica|NODE_6036_length_1330_cov_927_316785_g4932_i0;Nebulomonas_marisrubri|TRINITY_DN10350_c0_g1_TRINITY_DN10350_c0_g1_i1_g_91957_m_91957;Nebulomonas_marisrubri|TRINITY_DN10350_c0_g1_TRINITY_DN10350_c0_g1_i2_g_91958_m_91958;Nibble…
cluster1406	GO:0014909; P:smooth muscle cell migration; IEP:UniProtKB	15	Q13685	Ancoracysta_twista|GFYU01000649_1_p1;Ancoracysta_twista|GFYU01001642_1_p1;Hemimastix_kukwesjijk|EP00696_Hemimastix_kukwesjijk_P000288;Meteora_sporadica|NODE_6696_length_1213_cov_4_740451_g5488_i0;Nebulomonas_marisrubri|TRINITY_DN12451_c0_g1_TRINITY_DN12451_c0_g1_i2_g_36750_m_36750;Nibbleromonas_arcticus|TRINITY_DN1535_c0_g1_TRINITY_DN1535_c0_g1_i2_g_49059_m_49059;Nibbleromonas_arcticus|TRINITY_DN…
cluster1407	GO:0006412; P:translation; IEA:InterPro	15	Q9LF30	Ancoracysta_twista|GFYU01000670_1_p1;Hemimastix_kukwesjijk|EP00696_Hemimastix_kukwesjijk_P012704;Meteora_sporadica|NODE_5847_length_1366_cov_1516_864368_g4770_i0;Nebulomonas_marisrubri|TRINITY_DN12312_c0_g1_TRINITY_DN12312_c0_g1_i3_g_7794_m_7794;Nibbleromonas_arcticus|TRINITY_DN2979_c0_g1_TRINITY_DN2979_c0_g1_i1_g_8037_m_8037;Nibbleromonas_curacaus|TRINITY_DN3442_c0_g1_TRINITY_DN3442_c0_g1_i1_g_5…
cluster1408	GO:0006412; P:translation; IEA:InterPro	15	P41116	Ancoracysta_twista|GFYU01000679_1_p2;Hemimastix_kukwesjijk|EP00696_Hemimastix_kukwesjijk_P010726;Meteora_sporadica|NODE_5090_length_1534_cov_3166_607604_g4129_i0;Meteora_sporadica|NODE_9890_length_702_cov_4562_897036_g8247_i0;Nebulomonas_marisrubri|TRINITY_DN19412_c0_g1_TRINITY_DN19412_c0_g1_i1_g_39341_m_39341;Nebulomonas_marisrubri|TRINITY_DN8176_c0_g1_TRINITY_DN8176_c0_g1_i1_g_28338_m_28338;Nib…
cluster1409	GO:0006412; P:translation; IEA:InterPro	15	Q9SF40	Ancoracysta_twista|GFYU01000834_1_p1;Hemimastix_kukwesjijk|EP00696_Hemimastix_kukwesjijk_P017559;Meteora_sporadica|NODE_5325_length_1478_cov_2332_751588_g4324_i0;Nebulomonas_marisrubri|TRINITY_DN10088_c0_g1_TRINITY_DN10088_c0_g1_i1_g_80430_m_80430;Nebulomonas_marisrubri|TRINITY_DN33765_c0_g1_TRINITY_DN33765_c0_g1_i1_g_10675_m_10675;Nibbleromonas_arcticus|TRINITY_DN10489_c0_g1_TRINITY_DN10489_c0_g…
cluster1411	GO:0010265; P:SCF complex assembly; ISS:UniProtKB	15	Q5R6L5	Ancoracysta_twista|GFYU01000869_1_p1;Hemimastix_kukwesjijk|EP00696_Hemimastix_kukwesjijk_P016456;Meteora_sporadica|NODE_807_length_4174_cov_55_523462_g661_i0;Nebulomonas_marisrubri|TRINITY_DN8183_c0_g1_TRINITY_DN8183_c0_g1_i1_g_28473_m_28473;Nibbleromonas_arcticus|TRINITY_DN10283_c0_g1_TRINITY_DN10283_c0_g1_i1_g_10052_m_10052;Nibbleromonas_arcticus|TRINITY_DN23321_c0_g1_TRINITY_DN23321_c0_g1_i1_g…
cluster1413	GO:0006412; P:translation; IEA:InterPro	15	Q9FDZ9	Ancoracysta_twista|GFYU01000914_1_p1;Hemimastix_kukwesjijk|EP00696_Hemimastix_kukwesjijk_P002688;Meteora_sporadica|NODE_10613_length_611_cov_2464_056364_g8906_i0;Meteora_sporadica|NODE_6167_length_1308_cov_991_279872_g5045_i0;Nebulomonas_marisrubri|TRINITY_DN14430_c0_g1_TRINITY_DN14430_c0_g1_i1_g_30629_m_30629;Nebulomonas_marisrubri|TRINITY_DN14430_c0_g1_TRINITY_DN14430_c0_g1_i3_g_30631_m_30631;N…
cluster1416	GO:0009408; P:response to heat; IEA:InterPro	15	P43644	Ancoracysta_twista|GFYU01001154_1_p1;Hemimastix_kukwesjijk|EP00696_Hemimastix_kukwesjijk_P011698;Meteora_sporadica|NODE_10421_length_634_cov_101_221640_g8730_i0;Meteora_sporadica|NODE_6037_length_1330_cov_178_532703_g4933_i0;Nebulomonas_marisrubri|TRINITY_DN12873_c0_g1_TRINITY_DN12873_c0_g1_i1_g_5657_m_5657;Nibbleromonas_arcticus|TRINITY_DN861_c0_g1_TRINITY_DN861_c0_g1_i1_g_44753_m_44753;Nibblero…
cluster1417	GO:0000022; P:mitotic spindle elongation; IMP:AspGD	15	P20654	Ancoracysta_twista|GFYU01001204_1_p1;Ancoracysta_twista|GFYU01003590_1_p1;Hemimastix_kukwesjijk|EP00696_Hemimastix_kukwesjijk_P013618;Meteora_sporadica|NODE_5201_length_1503_cov_157_205964_g4218_i0;Nebulomonas_marisrubri|TRINITY_DN7162_c0_g1_TRINITY_DN7162_c0_g1_i2_g_83473_m_83473;Nebulomonas_marisrubri|TRINITY_DN8045_c0_g1_TRINITY_DN8045_c0_g1_i1_g_24832_m_24832;Nebulomonas_marisrubri|TRINITY_DN…
cluster1418	GO:0006412; P:translation; IEA:InterPro	15	P93099	Ancoracysta_twista|GFYU01001330_1_p2;Hemimastix_kukwesjijk|EP00696_Hemimastix_kukwesjijk_P001656;Meteora_sporadica|NODE_4348_length_1722_cov_1360_128236_g3049_i1;Nebulomonas_marisrubri|TRINITY_DN25385_c0_g1_TRINITY_DN25385_c0_g1_i1_g_25942_m_25942;Nebulomonas_marisrubri|TRINITY_DN6602_c1_g1_TRINITY_DN6602_c1_g1_i2_g_27691_m_27691;Nebulomonas_marisrubri|TRINITY_DN6602_c1_g1_TRINITY_DN6602_c1_g1_i3…
cluster1420	GO:0006418; P:tRNA aminoacylation for protein translation; IEA:InterPro	15	Q8S9J2	Ancoracysta_twista|GFYU01001407_1_p2;Hemimastix_kukwesjijk|EP00696_Hemimastix_kukwesjijk_P003359;Hemimastix_kukwesjijk|EP00696_Hemimastix_kukwesjijk_P016504;Meteora_sporadica|NODE_4394_length_1711_cov_108_732727_g3557_i0;Meteora_sporadica|NODE_5794_length_1376_cov_154_774905_g3557_i1;Nebulomonas_marisrubri|TRINITY_DN6743_c0_g1_TRINITY_DN6743_c0_g1_i2_g_77291_m_77291;Nebulomonas_marisrubri|TRINITY…
cluster1423	GO:0016021; C:integral component of membrane; IEA:UniProtKB-KW	15	P14198	Ancoracysta_twista|GFYU01001813_1_p1;Ancoracysta_twista|GFYU01014203_1_p1;Hemimastix_kukwesjijk|EP00696_Hemimastix_kukwesjijk_P012013;Hemimastix_kukwesjijk|EP00696_Hemimastix_kukwesjijk_P012014;Hemimastix_kukwesjijk|EP00696_Hemimastix_kukwesjijk_P016008;Meteora_sporadica|NODE_7056_length_1142_cov_146_755782_g5794_i0;Nebulomonas_marisrubri|TRINITY_DN30267_c0_g1_TRINITY_DN30267_c0_g1_i1_g_37603_m_3…
cluster1426	GO:0006508; P:proteolysis; IDA:UniProtKB	15	Q9Y2F2	Ancoracysta_twista|GFYU01002054_1_p1;Hemimastix_kukwesjijk|EP00696_Hemimastix_kukwesjijk_P019403;Hemimastix_kukwesjijk|EP00696_Hemimastix_kukwesjijk_P019405;Meteora_sporadica|NODE_3757_length_1921_cov_46_615054_g3051_i0;Meteora_sporadica|NODE_4207_length_1768_cov_52_893380_g3051_i1;Nebulomonas_marisrubri|TRINITY_DN13481_c1_g1_TRINITY_DN13481_c1_g1_i1_g_82637_m_82637;Nibbleromonas_arcticus|TRINITY…
cluster1427	GO:0046474; P:glycerophospholipid biosynthetic process; IBA:GO_Central	15	Q91WM2	Ancoracysta_twista|GFYU01002111_1_p1;Hemimastix_kukwesjijk|EP00696_Hemimastix_kukwesjijk_P020265;Meteora_sporadica|NODE_5612_length_1417_cov_160_366519_g4563_i0;Meteora_sporadica|NODE_6159_length_1309_cov_180_862981_g4563_i1;Nebulomonas_marisrubri|TRINITY_DN1295_c0_g1_TRINITY_DN1295_c0_g1_i1_g_58650_m_58650;Nebulomonas_marisrubri|TRINITY_DN7470_c0_g1_TRINITY_DN7470_c0_g1_i1_g_48445_m_48445;Nebulo…
cluster1431	GO:0031647; P:regulation of protein stability; IDA:AgBase	15	Q9Y2Z0	Ancoracysta_twista|GFYU01002328_1_p1;Ancoracysta_twista|GFYU01011885_1_p2;Hemimastix_kukwesjijk|EP00696_Hemimastix_kukwesjijk_P016979;Meteora_sporadica|NODE_7432_length_1080_cov_40_591757_g6101_i0;Nebulomonas_marisrubri|TRINITY_DN535_c0_g1_TRINITY_DN535_c0_g1_i1_g_17586_m_17586;Nibbleromonas_arcticus|TRINITY_DN2270_c0_g1_TRINITY_DN2270_c0_g1_i1_g_9746_m_9746;Nibbleromonas_arcticus|TRINITY_DN560_c…
cluster1433	GO:0006414; P:translational elongation; IEA:InterPro	15	P91913	Ancoracysta_twista|GFYU01002515_1_p1;Hemimastix_kukwesjijk|EP00696_Hemimastix_kukwesjijk_P007769;Hemimastix_kukwesjijk|EP00696_Hemimastix_kukwesjijk_P007770;Hemimastix_kukwesjijk|EP00696_Hemimastix_kukwesjijk_P017154;Meteora_sporadica|NODE_6668_length_1217_cov_1098_169550_g5466_i0;Nebulomonas_marisrubri|TRINITY_DN8974_c0_g1_TRINITY_DN8974_c0_g1_i1_g_73964_m_73964;Nibbleromonas_arcticus|TRINITY_DN…
cluster1452	GO:0006367; P:transcription initiation from RNA polymerase II promoter; ISO:PomBase	15	Q9USU9	Ancoracysta_twista|GFYU01004556_1_p1;Hemimastix_kukwesjijk|EP00696_Hemimastix_kukwesjijk_P006305;Meteora_sporadica|NODE_5834_length_1369_cov_39_587156_g4758_i0;Nebulomonas_marisrubri|TRINITY_DN6891_c0_g1_TRINITY_DN6891_c0_g1_i1_g_26852_m_26852;Nibbleromonas_arcticus|TRINITY_DN26402_c0_g1_TRINITY_DN26402_c0_g1_i1_g_23833_m_23833;Nibbleromonas_arcticus|TRINITY_DN3889_c0_g1_TRINITY_DN3889_c0_g1_i2_g…
cluster1463	GO:0016192; P:vesicle-mediated transport; IEA:InterPro	15	Q9SUS3	Ancoracysta_twista|GFYU01005549_1_p1;Hemimastix_kukwesjijk|EP00696_Hemimastix_kukwesjijk_P006487;Meteora_sporadica|NODE_1949_length_2837_cov_127_162104_g1585_i0;Nebulomonas_marisrubri|TRINITY_DN13626_c0_g1_TRINITY_DN13626_c0_g1_i1_g_56749_m_56749;Nibbleromonas_arcticus|TRINITY_DN17195_c0_g1_TRINITY_DN17195_c0_g1_i1_g_18784_m_18784;Nibbleromonas_curacaus|TRINITY_DN5038_c0_g1_TRINITY_DN5038_c0_g1_i…
cluster1466	GO:0006413; P:translational initiation; ISS:UniProtKB	15	Q2KHU8	Ancoracysta_twista|GFYU01005900_1_p1;Ancoracysta_twista|GFYU01010706_1_p1;Hemimastix_kukwesjijk|EP00696_Hemimastix_kukwesjijk_P006097;Hemimastix_kukwesjijk|EP00696_Hemimastix_kukwesjijk_P006108;Meteora_sporadica|NODE_4386_length_1714_cov_54_572293_g3550_i0;Nebulomonas_marisrubri|TRINITY_DN8190_c0_g1_TRINITY_DN8190_c0_g1_i1_g_28507_m_28507;Nibbleromonas_arcticus|TRINITY_DN949_c0_g1_TRINITY_DN949_c…
cluster1470	GO:0032543; P:mitochondrial translation; IBA:GO_Central	15	Q86AS6	Ancoracysta_twista|GFYU01006355_1_p1;Ancoracysta_twista|GFYU01012505_1_p2;Hemimastix_kukwesjijk|EP00696_Hemimastix_kukwesjijk_P017554;Meteora_sporadica|NODE_1459_length_3225_cov_26_579014_g1195_i0;Nebulomonas_marisrubri|TRINITY_DN11044_c0_g1_TRINITY_DN11044_c0_g1_i1_g_48727_m_48727;Nibbleromonas_arcticus|TRINITY_DN11315_c0_g1_TRINITY_DN11315_c0_g1_i1_g_46108_m_46108;Nibbleromonas_arcticus|TRINITY…
cluster1472	GO:0002244; P:hematopoietic progenitor cell differentiation; IEA:Ensembl	15	Q2KJE1	Ancoracysta_twista|GFYU01006514_1_p1;Hemimastix_kukwesjijk|EP00696_Hemimastix_kukwesjijk_P000754;Hemimastix_kukwesjijk|EP00696_Hemimastix_kukwesjijk_P010137;Meteora_sporadica|NODE_12076_length_451_cov_4_466667_g10315_i0;Nebulomonas_marisrubri|TRINITY_DN13964_c2_g3_TRINITY_DN13964_c2_g3_i1_g_70890_m_70890;Nebulomonas_marisrubri|TRINITY_DN13964_c2_g5_TRINITY_DN13964_c2_g5_i1_g_70908_m_70908;Nebulom…
cluster1473	GO:0036211; P:removal of initiator methionine from protein; IEA:UniProtKB-UniRule	15	Q5RBF3	Ancoracysta_twista|GFYU01006544_1_p1;Hemimastix_kukwesjijk|EP00696_Hemimastix_kukwesjijk_P020259;Meteora_sporadica|NODE_7594_length_1051_cov_22_192929_g6241_i0;Nebulomonas_marisrubri|TRINITY_DN1472_c0_g1_TRINITY_DN1472_c0_g1_i1_g_40059_m_40059;Nebulomonas_marisrubri|TRINITY_DN5275_c0_g1_TRINITY_DN5275_c0_g1_i1_g_51372_m_51372;Nibbleromonas_arcticus|TRINITY_DN9105_c0_g1_TRINITY_DN9105_c0_g1_i1_g_2…
cluster1483	GO:0016192; P:vesicle-mediated transport; IEA:InterPro	15	Q8L7A9	Ancoracysta_twista|GFYU01007742_1_p1;Ancoracysta_twista|GFYU01046626_1_p1;Ancoracysta_twista|GFYU01070046_1_p1;Hemimastix_kukwesjijk|EP00696_Hemimastix_kukwesjijk_P019598;Meteora_sporadica|NODE_2433_length_2519_cov_76_646054_g1970_i0;Meteora_sporadica|NODE_6143_length_1312_cov_60_396483_g5023_i0;Nebulomonas_marisrubri|TRINITY_DN5234_c0_g1_TRINITY_DN5234_c0_g1_i2_g_51362_m_51362;Nibbleromonas_arct…
cluster1491	GO:0016126; P:sterol biosynthetic process; IBA:GO_Central	15	Q9LDR4	Ancoracysta_twista|GFYU01008987_1_p2;Hemimastix_kukwesjijk|EP00696_Hemimastix_kukwesjijk_P003414;Hemimastix_kukwesjijk|EP00696_Hemimastix_kukwesjijk_P012348;Meteora_sporadica|NODE_6545_length_1242_cov_28_451312_g5364_i0;Nebulomonas_marisrubri|TRINITY_DN11478_c0_g1_TRINITY_DN11478_c0_g1_i1_g_26341_m_26341;Nibbleromonas_arcticus|TRINITY_DN16959_c0_g1_TRINITY_DN16959_c0_g1_i1_g_21262_m_21262;Nibbler…
cluster1494	GO:0008612; P:peptidyl-lysine modification to peptidyl-hypusine; IBA:GO_Central	15	Q54MQ7	Ancoracysta_twista|GFYU01009103_1_p1;Ancoracysta_twista|GFYU01019049_1_p1;Ancoracysta_twista|GFYU01041927_1_p1;Hemimastix_kukwesjijk|EP00696_Hemimastix_kukwesjijk_P001724;Meteora_sporadica|NODE_8903_length_834_cov_5_367400_g7368_i0;Nebulomonas_marisrubri|TRINITY_DN11937_c0_g1_TRINITY_DN11937_c0_g1_i1_g_15543_m_15543;Nebulomonas_marisrubri|TRINITY_DN11937_c0_g1_TRINITY_DN11937_c0_g1_i2_g_15550_m_1…
cluster1496	GO:0006418; P:tRNA aminoacylation for protein translation; ISS:UniProtKB	15	Q5RBL1	Ancoracysta_twista|GFYU01009531_1_p1;Ancoracysta_twista|GFYU01018650_1_p1;Ancoracysta_twista|GFYU01064875_1_p1;Hemimastix_kukwesjijk|EP00696_Hemimastix_kukwesjijk_P000140;Meteora_sporadica|NODE_3308_length_2086_cov_280_003951_g2677_i0;Nebulomonas_marisrubri|TRINITY_DN10444_c0_g1_TRINITY_DN10444_c0_g1_i2_g_18561_m_18561;Nebulomonas_marisrubri|TRINITY_DN5095_c0_g1_TRINITY_DN5095_c0_g1_i1_g_65935_m_…
cluster1501	N/A	15	N/A	Ancoracysta_twista|GFYU01010045_1_p1;Ancoracysta_twista|GFYU01022694_1_p1;Hemimastix_kukwesjijk|EP00696_Hemimastix_kukwesjijk_P010038;Meteora_sporadica|NODE_2209_length_2661_cov_72_439615_g1793_i0;Nebulomonas_marisrubri|TRINITY_DN13719_c0_g1_TRINITY_DN13719_c0_g1_i2_g_47117_m_47117;Nibbleromonas_arcticus|TRINITY_DN10697_c0_g1_TRINITY_DN10697_c0_g1_i1_g_17303_m_17303;Nibbleromonas_arcticus|TRINITY…
cluster1502	GO:0042147; P:retrograde transport, endosome to Golgi; IMP:UniProtKB	15	O60447	Ancoracysta_twista|GFYU01010055_1_p1;Hemimastix_kukwesjijk|EP00696_Hemimastix_kukwesjijk_P014226;Meteora_sporadica|NODE_6590_length_1233_cov_32_230375_g5402_i0;Nebulomonas_marisrubri|TRINITY_DN10436_c0_g1_TRINITY_DN10436_c0_g1_i2_g_18361_m_18361;Nibbleromonas_arcticus|TRINITY_DN3840_c0_g1_TRINITY_DN3840_c0_g1_i1_g_37762_m_37762;Nibbleromonas_curacaus|TRINITY_DN43698_c0_g1_TRINITY_DN43698_c0_g1_i1…
cluster1509	GO:0006508; P:proteolysis; IBA:GO_Central	15	P80209	Ancoracysta_twista|GFYU01010952_1_p1;Hemimastix_kukwesjijk|EP00696_Hemimastix_kukwesjijk_P018014;Hemimastix_kukwesjijk|EP00696_Hemimastix_kukwesjijk_P018023;Meteora_sporadica|NODE_5996_length_1340_cov_7_670055_g4896_i0;Nebulomonas_marisrubri|TRINITY_DN10358_c0_g1_TRINITY_DN10358_c0_g1_i1_g_92093_m_92093;Nibbleromonas_arcticus|TRINITY_DN26277_c0_g1_TRINITY_DN26277_c0_g1_i1_g_45811_m_45811;Nibblero…
cluster1510	GO:0045047; P:protein targeting to ER; IBA:GO_Central	15	Q1W376	Ancoracysta_twista|GFYU01011131_1_p1;Hemimastix_kukwesjijk|EP00696_Hemimastix_kukwesjijk_P010131;Hemimastix_kukwesjijk|EP00696_Hemimastix_kukwesjijk_P016798;Meteora_sporadica|NODE_9112_length_803_cov_73_905660_g7552_i0;Nebulomonas_marisrubri|TRINITY_DN9643_c0_g1_TRINITY_DN9643_c0_g1_i3_g_39514_m_39514;Nebulomonas_marisrubri|TRINITY_DN9643_c0_g1_TRINITY_DN9643_c0_g1_i4_g_39515_m_39515;Nibbleromona…
cluster1512	GO:0008380; P:RNA splicing; IEA:UniProtKB-KW	15	Q6DEY1	Ancoracysta_twista|GFYU01011424_1_p1;Ancoracysta_twista|GFYU01059472_1_p1;Hemimastix_kukwesjijk|EP00696_Hemimastix_kukwesjijk_P020025;Hemimastix_kukwesjijk|EP00696_Hemimastix_kukwesjijk_P020029;Meteora_sporadica|NODE_4200_length_1770_cov_41_760094_g3409_i0;Meteora_sporadica|NODE_9422_length_760_cov_100_841202_g7830_i0;Nebulomonas_marisrubri|TRINITY_DN6965_c0_g1_TRINITY_DN6965_c0_g1_i1_g_24379_m_2…
cluster1520	GO:0016032; P:viral process; IEA:UniProtKB-KW	15	Q13435	Ancoracysta_twista|GFYU01012730_1_p1;Hemimastix_kukwesjijk|EP00696_Hemimastix_kukwesjijk_P016963;Meteora_sporadica|NODE_4309_length_1735_cov_40_009558_g3494_i0;Nebulomonas_marisrubri|TRINITY_DN12128_c0_g1_TRINITY_DN12128_c0_g1_i1_g_16704_m_16704;Nebulomonas_marisrubri|TRINITY_DN12128_c0_g1_TRINITY_DN12128_c0_g1_i2_g_16709_m_16709;Nibbleromonas_arcticus|TRINITY_DN15326_c0_g1_TRINITY_DN15326_c0_g1_…
cluster1521	GO:0043967; P:(obsolete) histone H4 acetylation; IBA:GO_Central	15	Q6C9M9	Ancoracysta_twista|GFYU01012811_1_p1;Hemimastix_kukwesjijk|EP00696_Hemimastix_kukwesjijk_P002149;Hemimastix_kukwesjijk|EP00696_Hemimastix_kukwesjijk_P002150;Hemimastix_kukwesjijk|EP00696_Hemimastix_kukwesjijk_P002151;Hemimastix_kukwesjijk|EP00696_Hemimastix_kukwesjijk_P015935;Meteora_sporadica|NODE_4641_length_1646_cov_34_314196_g3760_i0;Nebulomonas_marisrubri|TRINITY_DN2151_c0_g1_TRINITY_DN2151_…
cluster1524	GO:0006283; P:transcription-coupled nucleotide-excision repair; ISS:UniProtKB	15	Q9DCD2	Ancoracysta_twista|GFYU01014108_1_p1;Ancoracysta_twista|GFYU01045354_1_p1;Ancoracysta_twista|GFYU01054094_1_p1;Ancoracysta_twista|GFYU01061887_1_p1;Hemimastix_kukwesjijk|EP00696_Hemimastix_kukwesjijk_P017304;Meteora_sporadica|NODE_1855_length_2898_cov_12_505816_g1518_i0;Nebulomonas_marisrubri|TRINITY_DN9517_c0_g1_TRINITY_DN9517_c0_g1_i1_g_79731_m_79731;Nibbleromonas_arcticus|TRINITY_DN24113_c0_g1…
cluster1526	GO:0002098; P:tRNA wobble uridine modification; ISS:UniProtKB	15	Q07G10	Ancoracysta_twista|GFYU01014884_1_p1;Hemimastix_kukwesjijk|EP00696_Hemimastix_kukwesjijk_P013181;Meteora_sporadica|NODE_3235_length_2118_cov_590_215848_g2621_i0;Meteora_sporadica|NODE_9236_length_785_cov_16_990331_g7663_i0;Nebulomonas_marisrubri|TRINITY_DN10534_c0_g1_TRINITY_DN10534_c0_g1_i1_g_94179_m_94179;Nibbleromonas_arcticus|TRINITY_DN16756_c0_g1_TRINITY_DN16756_c0_g1_i1_g_17460_m_17460;Nibb…
cluster1533	GO:0000036; F:acyl carrier activity; IEA:UniProtKB-UniRule	15	B5Y7W4	Ancoracysta_twista|GFYU01020242_1_p1;Hemimastix_kukwesjijk|EP00696_Hemimastix_kukwesjijk_P002512;Hemimastix_kukwesjijk|EP00696_Hemimastix_kukwesjijk_P007319;Hemimastix_kukwesjijk|EP00696_Hemimastix_kukwesjijk_P015622;Meteora_sporadica|NODE_11850_length_472_cov_97_189781_g10092_i0;Nebulomonas_marisrubri|TRINITY_DN4863_c0_g1_TRINITY_DN4863_c0_g1_i1_g_31009_m_31009;Nibbleromonas_arcticus|TRINITY_DN1…
cluster1539	GO:0006260; P:DNA replication; TAS:TAIR	15	Q9FL33	Ancoracysta_twista|GFYU01023400_1_p1;Ancoracysta_twista|GFYU01037325_1_p2;Hemimastix_kukwesjijk|EP00696_Hemimastix_kukwesjijk_P005438;Meteora_sporadica|NODE_1846_length_2903_cov_18_495074_g1510_i0;Nebulomonas_marisrubri|TRINITY_DN6860_c0_g1_TRINITY_DN6860_c0_g1_i1_g_27014_m_27014;Nibbleromonas_arcticus|TRINITY_DN25245_c0_g1_TRINITY_DN25245_c0_g1_i1_g_34438_m_34438;Nibbleromonas_arcticus|TRINITY_D…
cluster1546	GO:0031167; P:rRNA methylation; ISS:dictyBase	15	Q54NX0	Ancoracysta_twista|GFYU01024883_1_p1;Ancoracysta_twista|GFYU01027384_1_p1;Ancoracysta_twista|GFYU01068495_1_p2;Hemimastix_kukwesjijk|EP00696_Hemimastix_kukwesjijk_P020195;Meteora_sporadica|NODE_1517_length_3169_cov_20_325611_g1242_i0;Nebulomonas_marisrubri|TRINITY_DN13514_c0_g1_TRINITY_DN13514_c0_g1_i1_g_90572_m_90572;Nibbleromonas_arcticus|TRINITY_DN24406_c0_g1_TRINITY_DN24406_c0_g1_i1_g_417_m_4…
cluster1548	GO:1902584; P:positive regulation of response to water deprivation; IMP:UniProtKB	15	Q6K8D9	Ancoracysta_twista|GFYU01025576_1_p1;Hemimastix_kukwesjijk|EP00696_Hemimastix_kukwesjijk_P013368;Hemimastix_kukwesjijk|EP00696_Hemimastix_kukwesjijk_P013369;Meteora_sporadica|NODE_4256_length_1754_cov_128_866509_g3450_i0;Nebulomonas_marisrubri|TRINITY_DN10044_c0_g1_TRINITY_DN10044_c0_g1_i1_g_80668_m_80668;Nibbleromonas_arcticus|TRINITY_DN20510_c0_g1_TRINITY_DN20510_c0_g1_i1_g_20148_m_20148;Nibble…
cluster1556	GO:0003723; F:RNA binding; IEA:UniProtKB-KW	15	Q9I7T7	Ancoracysta_twista|GFYU01032552_1_p1;Ancoracysta_twista|GFYU01074718_1_p1;Hemimastix_kukwesjijk|EP00696_Hemimastix_kukwesjijk_P000650;Hemimastix_kukwesjijk|EP00696_Hemimastix_kukwesjijk_P017101;Hemimastix_kukwesjijk|EP00696_Hemimastix_kukwesjijk_P017102;Meteora_sporadica|NODE_2352_length_2579_cov_92_106037_g1910_i0;Nebulomonas_marisrubri|TRINITY_DN11469_c0_g1_TRINITY_DN11469_c0_g1_i1_g_26374_m_26…
cluster1557	GO:0009225; P:nucleotide-sugar metabolic process; IEA:InterPro	15	Q9L9E8	Ancoracysta_twista|GFYU01032780_1_p1;Ancoracysta_twista|GFYU01065659_1_p1;Hemimastix_kukwesjijk|EP00696_Hemimastix_kukwesjijk_P006125;Hemimastix_kukwesjijk|EP00696_Hemimastix_kukwesjijk_P006127;Meteora_sporadica|NODE_6398_length_1267_cov_145_856551_g5246_i0;Meteora_sporadica|NODE_6929_length_1165_cov_167_917572_g5246_i1;Nebulomonas_marisrubri|TRINITY_DN4174_c0_g1_TRINITY_DN4174_c0_g1_i1_g_410_m_4…
cluster1571	GO:0006412; P:translation; IEA:InterPro	15	P49199	Ancoracysta_twista|GFYU01039517_1_p2;Hemimastix_kukwesjijk|EP00696_Hemimastix_kukwesjijk_P006285;Hemimastix_kukwesjijk|EP00696_Hemimastix_kukwesjijk_P011856;Meteora_sporadica|NODE_8436_length_911_cov_1599_392941_g6970_i0;Meteora_sporadica|NODE_9758_length_718_cov_2660_522070_g6970_i1;Nebulomonas_marisrubri|TRINITY_DN14107_c1_g1_TRINITY_DN14107_c1_g1_i1_g_87841_m_87841;Nebulomonas_marisrubri|TRINI…
cluster1574	GO:0009611; P:response to wounding; IEP:TAIR	15	Q9SUG3	Ancoracysta_twista|GFYU01043123_1_p1;Hemimastix_kukwesjijk|EP00696_Hemimastix_kukwesjijk_P006186;Hemimastix_kukwesjijk|EP00696_Hemimastix_kukwesjijk_P017155;Meteora_sporadica|NODE_7383_length_1086_cov_17_035122_g6058_i0;Meteora_sporadica|NODE_7748_length_1024_cov_12_901350_g6376_i0;Nebulomonas_marisrubri|TRINITY_DN14002_c4_g6_TRINITY_DN14002_c4_g6_i1_g_71427_m_71427;Nibbleromonas_arcticus|TRINITY…
cluster1576	GO:0007052; P:mitotic spindle organization; IMP:SGD	15	P35201	Ancoracysta_twista|GFYU01045030_1_p1;Ancoracysta_twista|GFYU01059636_1_p1;Hemimastix_kukwesjijk|EP00696_Hemimastix_kukwesjijk_P003207;Hemimastix_kukwesjijk|EP00696_Hemimastix_kukwesjijk_P012823;Meteora_sporadica|NODE_3335_length_2077_cov_7_285218_g2699_i0;Nebulomonas_marisrubri|TRINITY_DN2725_c0_g1_TRINITY_DN2725_c0_g1_i2_g_66966_m_66966;Nibbleromonas_arcticus|TRINITY_DN14674_c0_g1_TRINITY_DN1467…
cluster1582	GO:0006879; P:intracellular iron ion homeostasis; IEA:UniProtKB-KW	15	Q653V6	Ancoracysta_twista|GFYU01050681_1_p1;Hemimastix_kukwesjijk|EP00696_Hemimastix_kukwesjijk_P011599;Hemimastix_kukwesjijk|EP00696_Hemimastix_kukwesjijk_P016832;Hemimastix_kukwesjijk|EP00696_Hemimastix_kukwesjijk_P018864;Meteora_sporadica|NODE_11154_length_549_cov_2_963115_g9418_i0;Meteora_sporadica|NODE_13316_length_347_cov_1_748252_g11553_i0;Meteora_sporadica|NODE_4694_length_1635_cov_7_656290_g380…
cluster1589	GO:0048034; P:heme O biosynthetic process; IEA:InterPro	15	O64886	Ancoracysta_twista|GFYU01066024_1_p1;Hemimastix_kukwesjijk|EP00696_Hemimastix_kukwesjijk_P006267;Hemimastix_kukwesjijk|EP00696_Hemimastix_kukwesjijk_P006268;Hemimastix_kukwesjijk|EP00696_Hemimastix_kukwesjijk_P006269;Meteora_sporadica|NODE_7234_length_1109_cov_14_499046_g5940_i0;Nebulomonas_marisrubri|TRINITY_DN12452_c0_g1_TRINITY_DN12452_c0_g1_i1_g_36593_m_36593;Nibbleromonas_arcticus|TRINITY_DN…
cluster1651	GO:0030042; P:actin filament depolymerization; IEA:InterPro	14	P37167	Ancoracysta_twista|GFYU01000302_1_p2;Ancoracysta_twista|GFYU01001831_1_p1;Ancoracysta_twista|GFYU01063056_1_p2;Hemimastix_kukwesjijk|EP00696_Hemimastix_kukwesjijk_P003825;Meteora_sporadica|NODE_10920_length_574_cov_1041_426901_g9195_i0;Nebulomonas_marisrubri|TRINITY_DN5795_c0_g1_TRINITY_DN5795_c0_g1_i3_g_16253_m_16253;Nibbleromonas_arcticus|TRINITY_DN76_c0_g1_TRINITY_DN76_c0_g1_i1_g_25258_m_25258…
cluster1656	GO:0006412; P:translation; IEA:InterPro	14	Q9T043	Ancoracysta_twista|GFYU01000438_1_p2;Hemimastix_kukwesjijk|EP00696_Hemimastix_kukwesjijk_P011232;Meteora_sporadica|NODE_11317_length_529_cov_2526_427350_g9571_i0;Nebulomonas_marisrubri|TRINITY_DN1456_c0_g1_TRINITY_DN1456_c0_g1_i1_g_40227_m_40227;Nibbleromonas_arcticus|TRINITY_DN4849_c0_g1_TRINITY_DN4849_c0_g1_i1_g_1986_m_1986;Nibbleromonas_curacaus|TRINITY_DN12666_c0_g1_TRINITY_DN12666_c0_g1_i1_g…
cluster1657	GO:0006412; P:translation; IEA:UniProtKB-UniRule	14	P49397	Ancoracysta_twista|GFYU01000457_1_p1;Hemimastix_kukwesjijk|EP00696_Hemimastix_kukwesjijk_P012515;Meteora_sporadica|NODE_4426_length_1702_cov_2013_051188_g3587_i0;Nebulomonas_marisrubri|TRINITY_DN28703_c0_g1_TRINITY_DN28703_c0_g1_i1_g_16309_m_16309;Nebulomonas_marisrubri|TRINITY_DN30531_c0_g1_TRINITY_DN30531_c0_g1_i1_g_78968_m_78968;Nibbleromonas_arcticus|TRINITY_DN22993_c0_g1_TRINITY_DN22993_c0_g…
cluster1658	GO:0006412; P:translation; IEA:InterPro	14	Q962Q6	Ancoracysta_twista|GFYU01000492_1_p1;Hemimastix_kukwesjijk|EP00696_Hemimastix_kukwesjijk_P000276;Meteora_sporadica|NODE_11335_length_527_cov_2893_716738_g4821_i1;Meteora_sporadica|NODE_5906_length_1358_cov_863_162683_g4821_i0;Nebulomonas_marisrubri|TRINITY_DN8044_c0_g1_TRINITY_DN8044_c0_g1_i1_g_25014_m_25014;Nibbleromonas_arcticus|TRINITY_DN3558_c0_g1_TRINITY_DN3558_c0_g1_i1_g_29339_m_29339;Nibbl…
cluster1660	GO:0042273; P:ribosomal large subunit biogenesis; IBA:GO_Central	14	Q9FJX2	Ancoracysta_twista|GFYU01000523_1_p1;Hemimastix_kukwesjijk|EP00696_Hemimastix_kukwesjijk_P015871;Meteora_sporadica|NODE_8618_length_880_cov_1711_476190_g7121_i0;Nebulomonas_marisrubri|TRINITY_DN35202_c0_g1_TRINITY_DN35202_c0_g1_i1_g_69096_m_69096;Nebulomonas_marisrubri|TRINITY_DN9302_c0_g3_TRINITY_DN9302_c0_g3_i1_g_11259_m_11259;Nibbleromonas_arcticus|TRINITY_DN2613_c0_g1_TRINITY_DN2613_c0_g1_i1_…
cluster1661	GO:0006412; P:translation; IEA:InterPro	14	P34091	Ancoracysta_twista|GFYU01000535_1_p2;Hemimastix_kukwesjijk|EP00696_Hemimastix_kukwesjijk_P012301;Meteora_sporadica|NODE_9932_length_696_cov_2890_963780_g8285_i0;Nebulomonas_marisrubri|TRINITY_DN18099_c0_g1_TRINITY_DN18099_c0_g1_i1_g_28132_m_28132;Nebulomonas_marisrubri|TRINITY_DN2733_c0_g1_TRINITY_DN2733_c0_g1_i1_g_66771_m_66771;Nibbleromonas_arcticus|TRINITY_DN1572_c0_g1_TRINITY_DN1572_c0_g1_i1_…
cluster1662	GO:0000463; P:maturation of LSU-rRNA from tricistronic rRNA transcript (SSU-rRNA, 58S rRNA, LSU-rRNA); IBA:GO_Central	14	P60039	Ancoracysta_twista|GFYU01000577_1_p1;Ancoracysta_twista|GFYU01000958_1_p1;Hemimastix_kukwesjijk|EP00696_Hemimastix_kukwesjijk_P016581;Meteora_sporadica|NODE_8825_length_847_cov_4860_583969_g7296_i0;Nebulomonas_marisrubri|TRINITY_DN13418_c1_g1_TRINITY_DN13418_c1_g1_i10_g_82050_m_82050;Nibbleromonas_arcticus|TRINITY_DN3711_c0_g1_TRINITY_DN3711_c0_g1_i1_g_42982_m_42982;Nibbleromonas_arcticus|TRINITY…
cluster1663	GO:0006511; P:ubiquitin-dependent protein catabolic process; ISS:dictyBase	14	Q55BK0	Ancoracysta_twista|GFYU01000610_1_p1;Hemimastix_kukwesjijk|EP00696_Hemimastix_kukwesjijk_P006446;Meteora_sporadica|NODE_6634_length_1225_cov_38_646907_g5441_i0;Nebulomonas_marisrubri|TRINITY_DN10864_c0_g1_TRINITY_DN10864_c0_g1_i2_g_19091_m_19091;Nibbleromonas_arcticus|TRINITY_DN24218_c0_g1_TRINITY_DN24218_c0_g1_i1_g_53857_m_53857;Nibbleromonas_curacaus|TRINITY_DN13227_c0_g1_TRINITY_DN13227_c0_g1_…
cluster1665	GO:0006665; P:sphingolipid metabolic process; IEA:InterPro	14	A4FUZ5	Ancoracysta_twista|GFYU01000655_1_p1;Ancoracysta_twista|GFYU01002391_1_p1;Ancoracysta_twista|GFYU01004895_1_p1;Hemimastix_kukwesjijk|EP00696_Hemimastix_kukwesjijk_P014511;Meteora_sporadica|NODE_5846_length_1367_cov_33_184533_g4769_i0;Nebulomonas_marisrubri|TRINITY_DN11958_c0_g1_TRINITY_DN11958_c0_g1_i1_g_15586_m_15586;Nebulomonas_marisrubri|TRINITY_DN9904_c0_g1_TRINITY_DN9904_c0_g1_i1_g_12434_m_1…
cluster1666	GO:0043161; P:proteasome-mediated ubiquitin-dependent protein catabolic process; IBA:GO_Central	14	Q9UI06	Ancoracysta_twista|GFYU01000712_1_p1;Ancoracysta_twista|GFYU01006749_1_p1;Hemimastix_kukwesjijk|EP00696_Hemimastix_kukwesjijk_P001303;Meteora_sporadica|NODE_5513_length_1437_cov_177_023256_g4480_i0;Nebulomonas_marisrubri|TRINITY_DN6610_c0_g1_TRINITY_DN6610_c0_g1_i1_g_28031_m_28031;Nebulomonas_marisrubri|TRINITY_DN6751_c0_g1_TRINITY_DN6751_c0_g1_i1_g_77138_m_77138;Nibbleromonas_arcticus|TRINITY_DN…
cluster1675	GO:0036158; P:outer dynein arm assembly; IBA:GO_Central	14	Q28G94	Ancoracysta_twista|GFYU01001142_1_p1;Ancoracysta_twista|GFYU01047224_1_p1;Hemimastix_kukwesjijk|EP00696_Hemimastix_kukwesjijk_P011808;Meteora_sporadica|NODE_6126_length_1315_cov_8_912281_g5010_i0;Meteora_sporadica|NODE_7603_length_1048_cov_124_394124_g6248_i0;Nebulomonas_marisrubri|TRINITY_DN4883_c0_g1_TRINITY_DN4883_c0_g1_i1_g_31131_m_31131;Nibbleromonas_arcticus|TRINITY_DN9261_c0_g1_TRINITY_DN9…
cluster1676	GO:0042761; P:very long-chain fatty acid biosynthetic process; ISS:UniProtKB	14	Q55C17	Ancoracysta_twista|GFYU01001146_1_p1;Hemimastix_kukwesjijk|EP00696_Hemimastix_kukwesjijk_P008488;Hemimastix_kukwesjijk|EP00696_Hemimastix_kukwesjijk_P008489;Meteora_sporadica|NODE_8010_length_981_cov_31_513043_g6594_i0;Nebulomonas_marisrubri|TRINITY_DN5195_c0_g1_TRINITY_DN5195_c0_g1_i1_g_73359_m_73359;Nibbleromonas_arcticus|TRINITY_DN9171_c0_g1_TRINITY_DN9171_c0_g1_i1_g_20443_m_20443;Nibbleromona…
cluster1677	GO:0009617; P:response to bacterium; HEP:dictyBase	14	P13022	Ancoracysta_twista|GFYU01001169_1_p1;Hemimastix_kukwesjijk|EP00696_Hemimastix_kukwesjijk_P002989;Meteora_sporadica|NODE_5826_length_1370_cov_186_774637_g4751_i0;Meteora_sporadica|NODE_6926_length_1166_cov_125_787330_g4751_i1;Nebulomonas_marisrubri|TRINITY_DN23340_c0_g1_TRINITY_DN23340_c0_g1_i1_g_13705_m_13705;Nebulomonas_marisrubri|TRINITY_DN9362_c0_g1_TRINITY_DN9362_c0_g1_i1_g_50877_m_50877;Nibb…
cluster1678	GO:0000028; P:ribosomal small subunit assembly; IBA:GO_Central	14	P0DKK8	Ancoracysta_twista|GFYU01001186_1_p1;Hemimastix_kukwesjijk|EP00696_Hemimastix_kukwesjijk_P006538;Meteora_sporadica|NODE_10043_length_682_cov_3515_157810_g8388_i0;Meteora_sporadica|NODE_11274_length_534_cov_2978_042283_g8388_i1;Nebulomonas_marisrubri|TRINITY_DN4658_c1_g1_TRINITY_DN4658_c1_g1_i2_g_63716_m_63716;Nibbleromonas_arcticus|TRINITY_DN1382_c0_g1_TRINITY_DN1382_c0_g1_i1_g_32861_m_32861;Nibb…
cluster1679	GO:0006412; P:translation; IEA:InterPro	14	Q05462	Ancoracysta_twista|GFYU01001217_1_p1;Hemimastix_kukwesjijk|EP00696_Hemimastix_kukwesjijk_P003257;Meteora_sporadica|NODE_11562_length_501_cov_3118_506818_g5670_i1;Meteora_sporadica|NODE_6905_length_1169_cov_1235_788809_g5670_i0;Nebulomonas_marisrubri|TRINITY_DN2361_c0_g1_TRINITY_DN2361_c0_g1_i1_g_6557_m_6557;Nebulomonas_marisrubri|TRINITY_DN24048_c0_g1_TRINITY_DN24048_c0_g1_i1_g_64590_m_64590;Nibb…
cluster1684	GO:0006511; P:ubiquitin-dependent protein catabolic process; IEA:InterPro	14	P52285	Ancoracysta_twista|GFYU01001288_1_p1;Ancoracysta_twista|GFYU01007583_1_p1;Hemimastix_kukwesjijk|EP00696_Hemimastix_kukwesjijk_P015179;Meteora_sporadica|NODE_10762_length_591_cov_18_209434_g9048_i0;Meteora_sporadica|NODE_11504_length_508_cov_496_984340_g9751_i0;Nebulomonas_marisrubri|TRINITY_DN5818_c0_g1_TRINITY_DN5818_c0_g1_i2_g_34551_m_34551;Nibbleromonas_arcticus|TRINITY_DN2792_c0_g1_TRINITY_DN…
cluster1686	GO:0006906; P:vesicle fusion; IBA:GO_Central	14	Q6GMS8	Ancoracysta_twista|GFYU01001317_1_p1;Hemimastix_kukwesjijk|EP00696_Hemimastix_kukwesjijk_P006508;Meteora_sporadica|NODE_6318_length_1282_cov_54_988534_g5177_i0;Nebulomonas_marisrubri|TRINITY_DN11040_c0_g1_TRINITY_DN11040_c0_g1_i2_g_48823_m_48823;Nebulomonas_marisrubri|TRINITY_DN11040_c0_g1_TRINITY_DN11040_c0_g1_i3_g_48824_m_48824;Nibbleromonas_arcticus|TRINITY_DN3650_c0_g1_TRINITY_DN3650_c0_g1_i1…
cluster1690	GO:0009312; P:oligosaccharide biosynthetic process; ISO:MGI	14	Q9R0Q9	Ancoracysta_twista|GFYU01001548_1_p1;Ancoracysta_twista|GFYU01006198_1_p1;Hemimastix_kukwesjijk|EP00696_Hemimastix_kukwesjijk_P007163;Meteora_sporadica|NODE_8296_length_933_cov_26_622706_g6842_i0;Nebulomonas_marisrubri|TRINITY_DN7007_c0_g1_TRINITY_DN7007_c0_g1_i2_g_32819_m_32819;Nebulomonas_marisrubri|TRINITY_DN8121_c0_g1_TRINITY_DN8121_c0_g1_i1_g_28408_m_28408;Nibbleromonas_arcticus|TRINITY_DN39…
cluster1691	GO:0015031; P:protein transport; IEA:UniProtKB-KW	14	P38542	Ancoracysta_twista|GFYU01001623_1_p1;Ancoracysta_twista|GFYU01014345_1_p2;Hemimastix_kukwesjijk|EP00696_Hemimastix_kukwesjijk_P007767;Hemimastix_kukwesjijk|EP00696_Hemimastix_kukwesjijk_P010130;Meteora_sporadica|NODE_9191_length_792_cov_96_681259_g7621_i0;Nebulomonas_marisrubri|TRINITY_DN4084_c0_g1_TRINITY_DN4084_c0_g1_i1_g_32315_m_32315;Nibbleromonas_arcticus|TRINITY_DN2779_c0_g1_TRINITY_DN2779_…
cluster1692	GO:1903725; P:regulation of phospholipid metabolic process; IMP:dictyBase	14	Q54N49	Ancoracysta_twista|GFYU01001668_1_p2;Hemimastix_kukwesjijk|EP00696_Hemimastix_kukwesjijk_P002911;Meteora_sporadica|NODE_3037_length_2201_cov_13093_667290_g195_i1;Meteora_sporadica|NODE_4497_length_1683_cov_16122_559803_g195_i2;Meteora_sporadica|NODE_5406_length_1461_cov_15139_180714_g195_i3;Nebulomonas_marisrubri|TRINITY_DN8594_c0_g1_TRINITY_DN8594_c0_g1_i1_g_52834_m_52834;Nibbleromonas_arcticus|…
cluster1693	GO:0007266; P:Rho protein signal transduction; IBA:GO_Central	14	Q9TU03	Ancoracysta_twista|GFYU01001689_1_p1;Hemimastix_kukwesjijk|EP00696_Hemimastix_kukwesjijk_P008385;Meteora_sporadica|NODE_9472_length_754_cov_524_806638_g7875_i0;Nebulomonas_marisrubri|TRINITY_DN11973_c0_g1_TRINITY_DN11973_c0_g1_i1_g_15853_m_15853;Nibbleromonas_arcticus|TRINITY_DN2755_c0_g1_TRINITY_DN2755_c0_g1_i1_g_47876_m_47876;Nibbleromonas_arcticus|TRINITY_DN2755_c0_g1_TRINITY_DN2755_c0_g1_i2_g…
cluster1695	GO:0001834; P:trophectodermal cell proliferation; ISS:UniProtKB	14	Q2TBX0	Ancoracysta_twista|GFYU01001716_1_p1;Hemimastix_kukwesjijk|EP00696_Hemimastix_kukwesjijk_P000390;Meteora_sporadica|NODE_3831_length_1898_cov_34_289058_g3110_i0;Meteora_sporadica|NODE_7329_length_1096_cov_22_611594_g3110_i1;Nebulomonas_marisrubri|TRINITY_DN13162_c0_g2_TRINITY_DN13162_c0_g2_i1_g_67466_m_67466;Nibbleromonas_arcticus|TRINITY_DN16442_c0_g1_TRINITY_DN16442_c0_g1_i1_g_4063_m_4063;Nibble…
cluster1700	GO:0031952; P:regulation of protein autophosphorylation; IBA:GO_Central	14	Q9LU89	Ancoracysta_twista|GFYU01001971_1_p1;Ancoracysta_twista|GFYU01048822_1_p1;Hemimastix_kukwesjijk|EP00696_Hemimastix_kukwesjijk_P004811;Meteora_sporadica|NODE_3696_length_1940_cov_510_484300_g2994_i0;Nebulomonas_marisrubri|TRINITY_DN10458_c0_g1_TRINITY_DN10458_c0_g1_i1_g_18502_m_18502;Nibbleromonas_arcticus|TRINITY_DN4092_c0_g1_TRINITY_DN4092_c0_g1_i1_g_19362_m_19362;Nibbleromonas_curacaus|TRINITY_…
cluster1702	GO:0043161; P:proteasome-mediated ubiquitin-dependent protein catabolic process; IBA:GO_Central	14	Q8W425	Ancoracysta_twista|GFYU01002208_1_p1;Hemimastix_kukwesjijk|EP00696_Hemimastix_kukwesjijk_P017737;Meteora_sporadica|NODE_6281_length_1289_cov_80_385179_g5143_i0;Nebulomonas_marisrubri|TRINITY_DN10309_c0_g1_TRINITY_DN10309_c0_g1_i1_g_91811_m_91811;Nibbleromonas_arcticus|TRINITY_DN24407_c0_g1_TRINITY_DN24407_c0_g1_i1_g_284_m_284;Nibbleromonas_curacaus|TRINITY_DN13622_c0_g1_TRINITY_DN13622_c0_g1_i1_g…
cluster1706	GO:0006412; P:translation; IEA:InterPro	14	Q56FG6	Ancoracysta_twista|GFYU01002393_1_p1;Hemimastix_kukwesjijk|EP00696_Hemimastix_kukwesjijk_P004735;Meteora_sporadica|NODE_4642_length_1645_cov_2401_220960_g3761_i0;Meteora_sporadica|NODE_7820_length_1011_cov_4032_033684_g3761_i1;Nebulomonas_marisrubri|TRINITY_DN14077_c3_g1_TRINITY_DN14077_c3_g1_i3_g_1733_m_1733;Nibbleromonas_arcticus|TRINITY_DN4531_c0_g1_TRINITY_DN4531_c0_g1_i1_g_40905_m_40905;Nibb…
cluster1707	GO:0045332; P:phospholipid translocation; IEA:GOC	14	Q8L8W0	Ancoracysta_twista|GFYU01002533_1_p2;Hemimastix_kukwesjijk|EP00696_Hemimastix_kukwesjijk_P003177;Meteora_sporadica|NODE_4033_length_1820_cov_336_067652_g3271_i0;Nebulomonas_marisrubri|TRINITY_DN3978_c0_g1_TRINITY_DN3978_c0_g1_i1_g_37410_m_37410;Nebulomonas_marisrubri|TRINITY_DN4509_c0_g1_TRINITY_DN4509_c0_g1_i1_g_52034_m_52034;Nibbleromonas_arcticus|TRINITY_DN3473_c0_g1_TRINITY_DN3473_c0_g1_i2_g_…
cluster1712	GO:0006166; P:purine ribonucleoside salvage; IBA:GO_Central	14	P37472	Ancoracysta_twista|GFYU01002841_1_p1;Hemimastix_kukwesjijk|EP00696_Hemimastix_kukwesjijk_P015477;Hemimastix_kukwesjijk|EP00696_Hemimastix_kukwesjijk_P015478;Meteora_sporadica|NODE_8537_length_894_cov_114_941176_g7054_i0;Meteora_sporadica|NODE_9461_length_756_cov_150_179856_g7054_i1;Nebulomonas_marisrubri|TRINITY_DN4558_c0_g1_TRINITY_DN4558_c0_g1_i1_g_51845_m_51845;Nibbleromonas_arcticus|TRINITY_D…
cluster1713	GO:0042176; P:regulation of protein catabolic process; IEA:InterPro	14	Q86VU1	Ancoracysta_twista|GFYU01002846_1_p1;Hemimastix_kukwesjijk|EP00696_Hemimastix_kukwesjijk_P011390;Meteora_sporadica|NODE_1545_length_3142_cov_56_246673_g1264_i0;Nebulomonas_marisrubri|TRINITY_DN10681_c0_g1_TRINITY_DN10681_c0_g1_i1_g_44535_m_44535;Nibbleromonas_arcticus|TRINITY_DN2027_c0_g1_TRINITY_DN2027_c0_g1_i1_g_38702_m_38702;Nibbleromonas_arcticus|TRINITY_DN22650_c0_g1_TRINITY_DN22650_c0_g1_i1…
cluster1718	GO:0006694; P:steroid biosynthetic process; IBA:GO_Central	14	P07857	Ancoracysta_twista|GFYU01003057_1_p1;Ancoracysta_twista|GFYU01007121_1_p1;Hemimastix_kukwesjijk|EP00696_Hemimastix_kukwesjijk_P004702;Meteora_sporadica|NODE_3282_length_2096_cov_15_782310_g2658_i0;Nebulomonas_marisrubri|TRINITY_DN14088_c1_g1_TRINITY_DN14088_c1_g1_i1_g_2507_m_2507;Nebulomonas_marisrubri|TRINITY_DN5191_c0_g1_TRINITY_DN5191_c0_g1_i1_g_73208_m_73208;Nibbleromonas_arcticus|TRINITY_DN9…
cluster1724	N/A	14	N/A	Ancoracysta_twista|GFYU01003327_1_p1;Hemimastix_kukwesjijk|EP00696_Hemimastix_kukwesjijk_P002906;Hemimastix_kukwesjijk|EP00696_Hemimastix_kukwesjijk_P006673;Meteora_sporadica|NODE_10822_length_583_cov_23_356322_g9103_i0;Nebulomonas_marisrubri|TRINITY_DN5926_c0_g1_TRINITY_DN5926_c0_g1_i1_g_58956_m_58956;Nebulomonas_marisrubri|TRINITY_DN5926_c0_g1_TRINITY_DN5926_c0_g1_i2_g_58958_m_58958;Nibbleromon…
cluster1725	GO:0006890; P:retrograde vesicle-mediated transport, Golgi to ER; IBA:GO_Central	14	Q6H8D6	Ancoracysta_twista|GFYU01003329_1_p1;Hemimastix_kukwesjijk|EP00696_Hemimastix_kukwesjijk_P004385;Hemimastix_kukwesjijk|EP00696_Hemimastix_kukwesjijk_P004386;Hemimastix_kukwesjijk|EP00696_Hemimastix_kukwesjijk_P004387;Meteora_sporadica|NODE_1691_length_3011_cov_28_874915_g1383_i0;Nebulomonas_marisrubri|TRINITY_DN13192_c0_g1_TRINITY_DN13192_c0_g1_i1_g_67149_m_67149;Nibbleromonas_arcticus|TRINITY_DN…
cluster1729	GO:0007399; P:nervous system development; IEA:UniProtKB-KW	14	Q3SYS9	Ancoracysta_twista|GFYU01003601_1_p1;Hemimastix_kukwesjijk|EP00696_Hemimastix_kukwesjijk_P005175;Meteora_sporadica|NODE_4059_length_1811_cov_48_950857_g3293_i0;Meteora_sporadica|NODE_4445_length_1698_cov_52_361026_g3293_i1;Nebulomonas_marisrubri|TRINITY_DN9122_c0_g1_TRINITY_DN9122_c0_g1_i1_g_33291_m_33291;Nibbleromonas_arcticus|TRINITY_DN21178_c0_g1_TRINITY_DN21178_c0_g1_i1_g_52988_m_52988;Nibble…
cluster1733	GO:0009650; P:UV protection; IMP:dictyBase	14	O00835	Ancoracysta_twista|GFYU01003864_1_p1;Hemimastix_kukwesjijk|EP00696_Hemimastix_kukwesjijk_P018623;Meteora_sporadica|NODE_2546_length_2455_cov_12_462406_g2065_i0;Nebulomonas_marisrubri|TRINITY_DN14019_c3_g12_TRINITY_DN14019_c3_g12_i1_g_1527_m_1527;Nibbleromonas_arcticus|TRINITY_DN12401_c0_g1_TRINITY_DN12401_c0_g1_i1_g_25703_m_25703;Nibbleromonas_curacaus|TRINITY_DN42771_c0_g1_TRINITY_DN42771_c0_g1_…
cluster1739	GO:0046872; F:metal ion binding; IEA:UniProtKB-KW	14	Q1RJ69	Ancoracysta_twista|GFYU01004174_1_p1;Ancoracysta_twista|GFYU01040474_1_p1;Hemimastix_kukwesjijk|EP00696_Hemimastix_kukwesjijk_P009597;Hemimastix_kukwesjijk|EP00696_Hemimastix_kukwesjijk_P016518;Meteora_sporadica|NODE_10441_length_632_cov_9_264448_g8749_i0;Nebulomonas_marisrubri|TRINITY_DN10644_c0_g1_TRINITY_DN10644_c0_g1_i1_g_44690_m_44690;Nebulomonas_marisrubri|TRINITY_DN10644_c0_g1_TRINITY_DN10…
cluster1749	GO:0006096; P:glycolytic process; IEA:UniProtKB-UniPathway	14	P26300	Ancoracysta_twista|GFYU01004699_1_p1;Ancoracysta_twista|GFYU01009690_1_p2;Ancoracysta_twista|GFYU01013011_1_p1;Hemimastix_kukwesjijk|EP00696_Hemimastix_kukwesjijk_P006247;Meteora_sporadica|NODE_4513_length_1677_cov_211_896040_g3658_i0;Nebulomonas_marisrubri|TRINITY_DN458_c0_g1_TRINITY_DN458_c0_g1_i1_g_79848_m_79848;Nebulomonas_marisrubri|TRINITY_DN8386_c0_g1_TRINITY_DN8386_c0_g1_i2_g_60409_m_6040…
cluster1751	GO:0003743; F:translation initiation factor activity; IEA:InterPro	14	A4QVI3	Ancoracysta_twista|GFYU01004756_1_p1;Hemimastix_kukwesjijk|EP00696_Hemimastix_kukwesjijk_P007809;Meteora_sporadica|NODE_9886_length_703_cov_21_602804_g8243_i0;Nebulomonas_marisrubri|TRINITY_DN6738_c0_g1_TRINITY_DN6738_c0_g1_i1_g_77018_m_77018;Nibbleromonas_arcticus|TRINITY_DN1758_c0_g1_TRINITY_DN1758_c0_g1_i1_g_44571_m_44571;Nibbleromonas_curacaus|TRINITY_DN12007_c0_g1_TRINITY_DN12007_c0_g1_i1_g_…
cluster1753	GO:0009585; P:red, far-red light phototransduction; IEA:UniProtKB-KW	14	Q8L5U0	Ancoracysta_twista|GFYU01004816_1_p1;Ancoracysta_twista|GFYU01092475_1_p1;Hemimastix_kukwesjijk|EP00696_Hemimastix_kukwesjijk_P012922;Hemimastix_kukwesjijk|EP00696_Hemimastix_kukwesjijk_P012923;Meteora_sporadica|NODE_4816_length_1602_cov_44_621674_g3901_i0;Meteora_sporadica|NODE_6074_length_1324_cov_62_181314_g3901_i1;Nebulomonas_marisrubri|TRINITY_DN12556_c0_g1_TRINITY_DN12556_c0_g1_i1_g_40453_m…
cluster1760	GO:0048573; P:photoperiodism, flowering; IMP:TAIR	14	Q9FMY5	Ancoracysta_twista|GFYU01005827_1_p1;Ancoracysta_twista|GFYU01019860_1_p1;Hemimastix_kukwesjijk|EP00696_Hemimastix_kukwesjijk_P015281;Meteora_sporadica|NODE_13373_length_343_cov_1_641844_g11610_i0;Meteora_sporadica|NODE_8855_length_841_cov_24_841026_g7325_i0;Nebulomonas_marisrubri|TRINITY_DN38967_c0_g1_TRINITY_DN38967_c0_g1_i1_g_42095_m_42095;Nebulomonas_marisrubri|TRINITY_DN6833_c0_g1_TRINITY_DN…
cluster1761	GO:0006434; P:seryl-tRNA aminoacylation; IBA:GO_Central	14	Q39230	Ancoracysta_twista|GFYU01005892_1_p2;Ancoracysta_twista|GFYU01006484_1_p2;Hemimastix_kukwesjijk|EP00696_Hemimastix_kukwesjijk_P007006;Hemimastix_kukwesjijk|EP00696_Hemimastix_kukwesjijk_P017576;Meteora_sporadica|NODE_5487_length_1443_cov_29_505065_g4457_i0;Nebulomonas_marisrubri|TRINITY_DN12829_c2_g1_TRINITY_DN12829_c2_g1_i1_g_6023_m_6023;Nibbleromonas_arcticus|TRINITY_DN16778_c0_g1_TRINITY_DN167…
cluster1762	GO:0009705; C:plant-type vacuole membrane; ISS:UniProtKB	14	Q948R8	Ancoracysta_twista|GFYU01005959_1_p1;Hemimastix_kukwesjijk|EP00696_Hemimastix_kukwesjijk_P005276;Hemimastix_kukwesjijk|EP00696_Hemimastix_kukwesjijk_P015548;Meteora_sporadica|NODE_7263_length_1105_cov_9_692529_g5966_i0;Nebulomonas_marisrubri|TRINITY_DN11679_c0_g1_TRINITY_DN11679_c0_g1_i3_g_44102_m_44102;Nebulomonas_marisrubri|TRINITY_DN6869_c0_g1_TRINITY_DN6869_c0_g1_i1_g_26877_m_26877;Nibbleromo…
cluster1770	GO:0006421; P:asparaginyl-tRNA aminoacylation; IEA:InterPro	14	Q2KJG3	Ancoracysta_twista|GFYU01006832_1_p1;Hemimastix_kukwesjijk|EP00696_Hemimastix_kukwesjijk_P003054;Meteora_sporadica|NODE_4723_length_1627_cov_9_002554_g3828_i0;Nebulomonas_marisrubri|TRINITY_DN4792_c0_g2_TRINITY_DN4792_c0_g2_i1_g_50027_m_50027;Nibbleromonas_arcticus|TRINITY_DN15598_c0_g1_TRINITY_DN15598_c0_g1_i1_g_49395_m_49395;Nibbleromonas_curacaus|TRINITY_DN10861_c0_g1_TRINITY_DN10861_c0_g1_i2_…
cluster1780	GO:0006886; P:intracellular protein transport; IEA:InterPro	14	P0CR39	Ancoracysta_twista|GFYU01008054_1_p1;Hemimastix_kukwesjijk|EP00696_Hemimastix_kukwesjijk_P007693;Meteora_sporadica|NODE_2700_length_2371_cov_137_548485_g2188_i0;Nebulomonas_marisrubri|TRINITY_DN9247_c0_g1_TRINITY_DN9247_c0_g1_i1_g_11282_m_11282;Nibbleromonas_arcticus|TRINITY_DN17021_c0_g1_TRINITY_DN17021_c0_g1_i1_g_35052_m_35052;Nibbleromonas_arcticus|TRINITY_DN26746_c0_g1_TRINITY_DN26746_c0_g1_i…
cluster1781	GO:0006334; P:nucleosome assembly; IBA:GO_Central	14	P16890	Ancoracysta_twista|GFYU01008111_1_p1;Hemimastix_kukwesjijk|EP00696_Hemimastix_kukwesjijk_P018681;Hemimastix_kukwesjijk|EP00696_Hemimastix_kukwesjijk_P018682;Meteora_sporadica|NODE_11198_length_542_cov_191_925156_g9459_i0;Nebulomonas_marisrubri|TRINITY_DN9876_c0_g1_TRINITY_DN9876_c0_g1_i3_g_7264_m_7264;Nibbleromonas_arcticus|TRINITY_DN4440_c0_g1_TRINITY_DN4440_c0_g1_i1_g_11101_m_11101;Nibbleromona…
cluster1782	GO:0051301; P:cell division; IEA:UniProtKB-KW	14	P0CP41	Ancoracysta_twista|GFYU01008161_1_p1;Hemimastix_kukwesjijk|EP00696_Hemimastix_kukwesjijk_P004056;Hemimastix_kukwesjijk|EP00696_Hemimastix_kukwesjijk_P013106;Meteora_sporadica|NODE_4447_length_1698_cov_12_543677_g3604_i0;Nebulomonas_marisrubri|TRINITY_DN5059_c0_g1_TRINITY_DN5059_c0_g1_i1_g_65799_m_65799;Nibbleromonas_arcticus|TRINITY_DN11750_c0_g1_TRINITY_DN11750_c0_g1_i1_g_18629_m_18629;Nibblerom…
cluster1786	GO:0006412; P:translation; IBA:GO_Central	14	P15170	Ancoracysta_twista|GFYU01008377_1_p1;Ancoracysta_twista|GFYU01009011_1_p1;Hemimastix_kukwesjijk|EP00696_Hemimastix_kukwesjijk_P017319;Hemimastix_kukwesjijk|EP00696_Hemimastix_kukwesjijk_P018558;Meteora_sporadica|NODE_4472_length_1692_cov_21_765788_g3623_i0;Nebulomonas_marisrubri|TRINITY_DN29607_c0_g1_TRINITY_DN29607_c0_g1_i1_g_76839_m_76839;Nebulomonas_marisrubri|TRINITY_DN8578_c0_g1_TRINITY_DN85…
cluster1787	GO:0015031; P:protein transport; IBA:GO_Central	14	Q6Z8F5	Ancoracysta_twista|GFYU01008394_1_p1;Hemimastix_kukwesjijk|EP00696_Hemimastix_kukwesjijk_P008299;Meteora_sporadica|NODE_7657_length_1037_cov_72_551230_g6296_i0;Nebulomonas_marisrubri|TRINITY_DN33970_c0_g1_TRINITY_DN33970_c0_g1_i1_g_58389_m_58389;Nibbleromonas_arcticus|TRINITY_DN2297_c0_g1_TRINITY_DN2297_c0_g1_i1_g_9406_m_9406;Nibbleromonas_curacaus|TRINITY_DN3655_c0_g1_TRINITY_DN3655_c0_g1_i1_g_2…
cluster1788	GO:0071586; P:CAAX-box protein processing; IBA:GO_Central	14	Q9U1H8	Ancoracysta_twista|GFYU01008458_1_p1;Hemimastix_kukwesjijk|EP00696_Hemimastix_kukwesjijk_P016382;Meteora_sporadica|NODE_5007_length_1554_cov_23_880107_g4051_i0;Meteora_sporadica|NODE_5431_length_1455_cov_27_631994_g4051_i1;Meteora_sporadica|NODE_6238_length_1296_cov_27_498785_g4051_i2;Nebulomonas_marisrubri|TRINITY_DN12527_c0_g1_TRINITY_DN12527_c0_g1_i1_g_40352_m_40352;Nibbleromonas_arcticus|TRIN…
cluster1797	GO:0000398; P:mRNA splicing, via spliceosome; ISS:UniProtKB	14	Q6NUB2	Ancoracysta_twista|GFYU01010224_1_p1;Ancoracysta_twista|GFYU01013257_1_p1;Hemimastix_kukwesjijk|EP00696_Hemimastix_kukwesjijk_P013862;Meteora_sporadica|NODE_9559_length_741_cov_73_992647_g7949_i0;Nebulomonas_marisrubri|TRINITY_DN7092_c0_g1_TRINITY_DN7092_c0_g1_i1_g_32842_m_32842;Nibbleromonas_arcticus|TRINITY_DN1314_c0_g1_TRINITY_DN1314_c0_g1_i1_g_32809_m_32809;Nibbleromonas_curacaus|TRINITY_DN28…
cluster1807	GO:0006364; P:rRNA processing; IBA:GO_Central	14	O22892	Ancoracysta_twista|GFYU01011553_1_p1;Ancoracysta_twista|GFYU01012674_1_p1;Hemimastix_kukwesjijk|EP00696_Hemimastix_kukwesjijk_P001197;Meteora_sporadica|NODE_6205_length_1303_cov_8_034622_g5076_i0;Nebulomonas_marisrubri|TRINITY_DN7657_c0_g1_TRINITY_DN7657_c0_g1_i1_g_14933_m_14933;Nibbleromonas_arcticus|TRINITY_DN2047_c0_g1_TRINITY_DN2047_c0_g1_i1_g_38610_m_38610;Nibbleromonas_curacaus|TRINITY_DN85…
cluster1816	GO:0009213; P:pyrimidine deoxyribonucleoside triphosphate catabolic process; ISS:dictyBase	14	Q54BW5	Ancoracysta_twista|GFYU01013130_1_p1;Ancoracysta_twista|GFYU01053216_1_p2;Hemimastix_kukwesjijk|EP00696_Hemimastix_kukwesjijk_P011615;Meteora_sporadica|NODE_7936_length_994_cov_7_190782_g6534_i0;Nebulomonas_marisrubri|TRINITY_DN34058_c0_g1_TRINITY_DN34058_c0_g1_i1_g_73429_m_73429;Nibbleromonas_arcticus|TRINITY_DN25821_c0_g1_TRINITY_DN25821_c0_g1_i1_g_3355_m_3355;Nibbleromonas_curacaus|TRINITY_DN1…
cluster1817	GO:0006265; P:DNA topological change; IBA:GO_Central	14	P30181	Ancoracysta_twista|GFYU01013204_1_p1;Ancoracysta_twista|GFYU01015668_1_p1;Hemimastix_kukwesjijk|EP00696_Hemimastix_kukwesjijk_P006603;Meteora_sporadica|NODE_2204_length_2664_cov_10_137534_g1788_i0;Nebulomonas_marisrubri|TRINITY_DN11295_c0_g1_TRINITY_DN11295_c0_g1_i1_g_63348_m_63348;Nibbleromonas_arcticus|TRINITY_DN17919_c0_g1_TRINITY_DN17919_c0_g1_i1_g_18538_m_18538;Nibbleromonas_arcticus|TRINITY…
cluster1844	GO:2000035; P:regulation of stem cell division; IMP:FlyBase	14	Q9VMW9	Ancoracysta_twista|GFYU01018855_1_p1;Hemimastix_kukwesjijk|EP00696_Hemimastix_kukwesjijk_P008020;Meteora_sporadica|NODE_6701_length_1212_cov_23_276281_g5493_i0;Nebulomonas_marisrubri|TRINITY_DN8973_c0_g1_TRINITY_DN8973_c0_g1_i1_g_74170_m_74170;Nibbleromonas_arcticus|TRINITY_DN4675_c0_g1_TRINITY_DN4675_c0_g1_i1_g_31680_m_31680;Nibbleromonas_curacaus|TRINITY_DN13483_c0_g1_TRINITY_DN13483_c0_g1_i13_…
cluster1846	GO:2000270; P:negative regulation of fibroblast apoptotic process; IEA:Ensembl	14	Q5ZMW3	Ancoracysta_twista|GFYU01019940_1_p1;Hemimastix_kukwesjijk|EP00696_Hemimastix_kukwesjijk_P020161;Hemimastix_kukwesjijk|EP00696_Hemimastix_kukwesjijk_P020162;Meteora_sporadica|NODE_4206_length_1768_cov_56_922086_g3413_i0;Nebulomonas_marisrubri|TRINITY_DN13746_c7_g1_TRINITY_DN13746_c7_g1_i1_g_47634_m_47634;Nibbleromonas_arcticus|TRINITY_DN11845_c0_g1_TRINITY_DN11845_c0_g1_i1_g_27295_m_27295;Nibbler…
cluster1855	GO:0007283; P:spermatogenesis; IMP:FlyBase	14	Q9W0S7	Ancoracysta_twista|GFYU01021812_1_p2;Ancoracysta_twista|GFYU01045463_1_p2;Ancoracysta_twista|GFYU01056687_1_p1;Hemimastix_kukwesjijk|EP00696_Hemimastix_kukwesjijk_P014033;Meteora_sporadica|NODE_10235_length_658_cov_21_051926_g8558_i0;Meteora_sporadica|NODE_2202_length_2664_cov_24_330772_g1786_i0;Nebulomonas_marisrubri|TRINITY_DN12580_c0_g1_TRINITY_DN12580_c0_g1_i1_g_40885_m_40885;Nibbleromonas_ar…
cluster1856	GO:0048443; P:stamen development; IMP:TAIR	14	Q8W4D0	Ancoracysta_twista|GFYU01022490_1_p1;Hemimastix_kukwesjijk|EP00696_Hemimastix_kukwesjijk_P013685;Hemimastix_kukwesjijk|EP00696_Hemimastix_kukwesjijk_P017521;Meteora_sporadica|NODE_3645_length_1963_cov_11_924290_g2952_i0;Nebulomonas_marisrubri|TRINITY_DN3452_c0_g1_TRINITY_DN3452_c0_g1_i1_g_83176_m_83176;Nibbleromonas_arcticus|TRINITY_DN4981_c0_g1_TRINITY_DN4981_c0_g1_i1_g_27463_m_27463;Nibbleromon…
cluster1858	GO:0006904; P:vesicle docking involved in exocytosis; IBA:GO_Central	14	P59015	Ancoracysta_twista|GFYU01023677_1_p1;Hemimastix_kukwesjijk|EP00696_Hemimastix_kukwesjijk_P008636;Meteora_sporadica|NODE_1754_length_2968_cov_46_267974_g1434_i0;Nebulomonas_marisrubri|TRINITY_DN3990_c0_g1_TRINITY_DN3990_c0_g1_i2_g_37469_m_37469;Nibbleromonas_arcticus|TRINITY_DN8193_c0_g1_TRINITY_DN8193_c0_g1_i1_g_10367_m_10367;Nibbleromonas_curacaus|TRINITY_DN36228_c0_g1_TRINITY_DN36228_c0_g1_i1_g…
cluster1861	GO:0006364; P:rRNA processing; IEA:UniProtKB-KW	14	Q9HE87	Ancoracysta_twista|GFYU01026004_1_p1;Ancoracysta_twista|GFYU01030189_1_p1;Hemimastix_kukwesjijk|EP00696_Hemimastix_kukwesjijk_P006944;Hemimastix_kukwesjijk|EP00696_Hemimastix_kukwesjijk_P006945;Meteora_sporadica|NODE_6339_length_1278_cov_28_182416_g5193_i0;Nebulomonas_marisrubri|TRINITY_DN5976_c0_g1_TRINITY_DN5976_c0_g1_i1_g_59007_m_59007;Nibbleromonas_arcticus|TRINITY_DN22199_c0_g1_TRINITY_DN221…
cluster1862	GO:0000413; P:protein peptidyl-prolyl isomerization; IBA:GO_Central	14	Q9LPC7	Ancoracysta_twista|GFYU01026212_1_p1;Ancoracysta_twista|GFYU01072316_1_p2;Hemimastix_kukwesjijk|EP00696_Hemimastix_kukwesjijk_P005657;Meteora_sporadica|NODE_10509_length_624_cov_39_611012_g8810_i0;Nebulomonas_marisrubri|TRINITY_DN9394_c0_g1_TRINITY_DN9394_c0_g1_i1_g_50549_m_50549;Nibbleromonas_arcticus|TRINITY_DN25648_c0_g1_TRINITY_DN25648_c0_g1_i1_g_22421_m_22421;Nibbleromonas_curacaus|TRINITY_D…
cluster1863	GO:0016559; P:peroxisome fission; IBA:GO_Central	14	Q6CB13	Ancoracysta_twista|GFYU01027350_1_p1;Hemimastix_kukwesjijk|EP00696_Hemimastix_kukwesjijk_P007498;Hemimastix_kukwesjijk|EP00696_Hemimastix_kukwesjijk_P019586;Meteora_sporadica|NODE_847_length_4094_cov_36_502108_g692_i0;Nebulomonas_marisrubri|TRINITY_DN15178_c0_g1_TRINITY_DN15178_c0_g1_i1_g_73670_m_73670;Nibbleromonas_arcticus|TRINITY_DN11653_c0_g1_TRINITY_DN11653_c0_g1_i1_g_28539_m_28539;Nibblerom…
cluster1880	GO:0005730; C:nucleolus; IEA:UniProtKB-SubCell	14	Q05024	Ancoracysta_twista|GFYU01036268_1_p1;Hemimastix_kukwesjijk|EP00696_Hemimastix_kukwesjijk_P019406;Meteora_sporadica|NODE_7081_length_1137_cov_115_944238_g5816_i0;Nebulomonas_marisrubri|TRINITY_DN5081_c0_g1_TRINITY_DN5081_c0_g1_i1_g_65993_m_65993;Nebulomonas_marisrubri|TRINITY_DN8207_c0_g1_TRINITY_DN8207_c0_g1_i2_g_11779_m_11779;Nibbleromonas_arcticus|TRINITY_DN25461_c0_g1_TRINITY_DN25461_c0_g1_i1_…
cluster1881	GO:0006099; P:tricarboxylic acid cycle; IEA:UniProtKB-KW	14	Q869Y7	Ancoracysta_twista|GFYU01036376_1_p1;Hemimastix_kukwesjijk|EP00696_Hemimastix_kukwesjijk_P012265;Meteora_sporadica|NODE_5156_length_1515_cov_110_557084_g4183_i0;Nebulomonas_marisrubri|TRINITY_DN11923_c0_g1_TRINITY_DN11923_c0_g1_i1_g_15400_m_15400;Nebulomonas_marisrubri|TRINITY_DN11923_c0_g1_TRINITY_DN11923_c0_g1_i2_g_15405_m_15405;Nibbleromonas_arcticus|TRINITY_DN24086_c0_g1_TRINITY_DN24086_c0_g1…
cluster1885	GO:0030587; P:sorocarp development; HMP:dictyBase	14	Q54KI3	Ancoracysta_twista|GFYU01040145_1_p1;Ancoracysta_twista|GFYU01045923_1_p1;Hemimastix_kukwesjijk|EP00696_Hemimastix_kukwesjijk_P000818;Meteora_sporadica|NODE_2516_length_2466_cov_41_037838_g2038_i0;Nebulomonas_marisrubri|TRINITY_DN12786_c0_g1_TRINITY_DN12786_c0_g1_i3_g_62396_m_62396;Nibbleromonas_arcticus|TRINITY_DN26314_c0_g1_TRINITY_DN26314_c0_g1_i1_g_47272_m_47272;Nibbleromonas_curacaus|TRINITY…
cluster1887	GO:0006886; P:intracellular protein transport; IEA:InterPro	14	Q8AY73	Ancoracysta_twista|GFYU01040920_1_p2;Ancoracysta_twista|GFYU01056923_1_p1;Ancoracysta_twista|GFYU01063575_1_p1;Hemimastix_kukwesjijk|EP00696_Hemimastix_kukwesjijk_P002672;Meteora_sporadica|NODE_1762_length_2964_cov_9_173269_g1442_i0;Nebulomonas_marisrubri|TRINITY_DN13091_c0_g1_TRINITY_DN13091_c0_g1_i1_g_93037_m_93037;Nibbleromonas_arcticus|TRINITY_DN19041_c0_g1_TRINITY_DN19041_c0_g1_i1_g_23152_m_…
cluster1891	GO:0008380; P:RNA splicing; TAS:ProtInc	14	Q15029	Ancoracysta_twista|GFYU01043982_1_p1;Hemimastix_kukwesjijk|EP00696_Hemimastix_kukwesjijk_P011367;Meteora_sporadica|NODE_1647_length_3053_cov_12_896725_g1345_i0;Nebulomonas_marisrubri|TRINITY_DN11059_c0_g1_TRINITY_DN11059_c0_g1_i1_g_48994_m_48994;Nebulomonas_marisrubri|TRINITY_DN11059_c0_g1_TRINITY_DN11059_c0_g1_i2_g_48997_m_48997;Nibbleromonas_arcticus|TRINITY_DN5802_c0_g1_TRINITY_DN5802_c0_g1_i1…
cluster1894	GO:0006396; P:RNA processing; IEA:InterPro	14	Q2HJ88	Ancoracysta_twista|GFYU01047721_1_p1;Hemimastix_kukwesjijk|EP00696_Hemimastix_kukwesjijk_P015536;Meteora_sporadica|NODE_5732_length_1390_cov_19_522950_g4671_i0;Meteora_sporadica|NODE_7545_length_1061_cov_18_975000_g4671_i1;Nebulomonas_marisrubri|TRINITY_DN8011_c0_g1_TRINITY_DN8011_c0_g1_i1_g_24978_m_24978;Nibbleromonas_arcticus|TRINITY_DN1103_c1_g1_TRINITY_DN1103_c1_g1_i1_g_28092_m_28092;Nibblero…
cluster1901	GO:0006072; P:glycerol-3-phosphate metabolic process; IEA:UniProtKB-UniRule	14	A6WXV2	Ancoracysta_twista|GFYU01056147_1_p1;Hemimastix_kukwesjijk|EP00696_Hemimastix_kukwesjijk_P020084;Meteora_sporadica|NODE_3693_length_1941_cov_69_806915_g2991_i0;Meteora_sporadica|NODE_7810_length_1013_cov_58_039916_g2991_i1;Nebulomonas_marisrubri|TRINITY_DN5618_c0_g1_TRINITY_DN5618_c0_g1_i1_g_84870_m_84870;Nibbleromonas_arcticus|TRINITY_DN17704_c0_g1_TRINITY_DN17704_c0_g1_i1_g_32235_m_32235;Nibble…
cluster1907	GO:0031648; P:protein destabilization; IEA:Ensembl	14	A3KMV2	Ancoracysta_twista|GFYU01065966_1_p2;Hemimastix_kukwesjijk|EP00696_Hemimastix_kukwesjijk_P003646;Hemimastix_kukwesjijk|EP00696_Hemimastix_kukwesjijk_P008125;Meteora_sporadica|NODE_5478_length_1444_cov_26_120752_g4449_i0;Nebulomonas_marisrubri|TRINITY_DN13982_c2_g2_TRINITY_DN13982_c2_g2_i2_g_72361_m_72361;Nibbleromonas_arcticus|TRINITY_DN13786_c0_g1_TRINITY_DN13786_c0_g1_i1_g_27735_m_27735;Nibbler…
cluster1916	GO:0001732; P:formation of cytoplasmic translation initiation complex; IEA:UniProtKB-UniRule	14	Q9XHM1	Ancoracysta_twista|GFYU01082794_1_p1;Hemimastix_kukwesjijk|EP00696_Hemimastix_kukwesjijk_P012527;Meteora_sporadica|NODE_2016_length_2797_cov_22_094664_g1641_i0;Nebulomonas_marisrubri|TRINITY_DN13606_c0_g1_TRINITY_DN13606_c0_g1_i1_g_57002_m_57002;Nibbleromonas_arcticus|TRINITY_DN22974_c0_g1_TRINITY_DN22974_c0_g1_i1_g_15205_m_15205;Nibbleromonas_curacaus|TRINITY_DN12136_c0_g1_TRINITY_DN12136_c0_g1_…
cluster1972	GO:0006412; P:translation; IEA:InterPro	13	Q9XGL4	Ancoracysta_twista|GFYU01000007_1_p1;Hemimastix_kukwesjijk|EP00696_Hemimastix_kukwesjijk_P013212;Meteora_sporadica|NODE_11794_length_476_cov_3004_706024_g10036_i0;Nebulomonas_marisrubri|TRINITY_DN1447_c0_g1_TRINITY_DN1447_c0_g1_i1_g_40246_m_40246;Nibbleromonas_arcticus|TRINITY_DN1486_c0_g1_TRINITY_DN1486_c0_g1_i1_g_47499_m_47499;Nibbleromonas_curacaus|TRINITY_DN9394_c0_g1_TRINITY_DN9394_c0_g1_i10…
cluster1976	GO:0006412; P:translation; IEA:InterPro	13	P62302	Ancoracysta_twista|GFYU01000112_1_p2;Hemimastix_kukwesjijk|EP00696_Hemimastix_kukwesjijk_P014695;Meteora_sporadica|NODE_10826_length_582_cov_3434_896353_g5404_i1;Meteora_sporadica|NODE_6592_length_1232_cov_1252_362938_g5404_i0;Nebulomonas_marisrubri|TRINITY_DN8450_c0_g1_TRINITY_DN8450_c0_g1_i1_g_12911_m_12911;Nibbleromonas_arcticus|TRINITY_DN2240_c0_g1_TRINITY_DN2240_c0_g1_i1_g_9729_m_9729;Nibble…
cluster1977	GO:0042273; P:ribosomal large subunit biogenesis; IBA:GO_Central	13	Q9C912	Ancoracysta_twista|GFYU01000159_1_p2;Hemimastix_kukwesjijk|EP00696_Hemimastix_kukwesjijk_P000116;Hemimastix_kukwesjijk|EP00696_Hemimastix_kukwesjijk_P007669;Hemimastix_kukwesjijk|EP00696_Hemimastix_kukwesjijk_P014950;Meteora_sporadica|NODE_7110_length_1132_cov_1260_535014_g5837_i0;Nebulomonas_marisrubri|TRINITY_DN3281_c0_g1_TRINITY_DN3281_c0_g1_i1_g_16523_m_16523;Nibbleromonas_arcticus|TRINITY_DN…
cluster1978	GO:0006412; P:translation; ISS:dictyBase	13	P48160	Ancoracysta_twista|GFYU01000176_1_p1;Hemimastix_kukwesjijk|EP00696_Hemimastix_kukwesjijk_P016731;Meteora_sporadica|NODE_10608_length_612_cov_3525_840290_g5860_i1;Meteora_sporadica|NODE_7136_length_1128_cov_1806_738519_g5860_i0;Nebulomonas_marisrubri|TRINITY_DN17787_c0_g1_TRINITY_DN17787_c0_g1_i1_g_76755_m_76755;Nebulomonas_marisrubri|TRINITY_DN3368_c0_g1_TRINITY_DN3368_c0_g1_i1_g_29997_m_29997;Ni…
cluster1979	GO:0072583; P:clathrin-dependent endocytosis; IMP:MGI	13	Q8BUV8	Ancoracysta_twista|GFYU01000224_1_p1;Hemimastix_kukwesjijk|EP00696_Hemimastix_kukwesjijk_P012264;Hemimastix_kukwesjijk|EP00696_Hemimastix_kukwesjijk_P019724;Meteora_sporadica|NODE_5652_length_1408_cov_25_031923_g4595_i0;Nebulomonas_marisrubri|TRINITY_DN13604_c0_g1_TRINITY_DN13604_c0_g1_i2_g_56181_m_56181;Nibbleromonas_arcticus|TRINITY_DN23508_c0_g1_TRINITY_DN23508_c0_g1_i1_g_48178_m_48178;Nibbler…
cluster1980	GO:0030163; P:protein catabolic process; TAS:TAIR	13	Q9C774	Ancoracysta_twista|GFYU01000272_1_p1;Hemimastix_kukwesjijk|EP00696_Hemimastix_kukwesjijk_P006596;Meteora_sporadica|NODE_6868_length_1178_cov_106_333930_g5639_i0;Nebulomonas_marisrubri|TRINITY_DN7105_c0_g1_TRINITY_DN7105_c0_g1_i1_g_83501_m_83501;Nebulomonas_marisrubri|TRINITY_DN7105_c0_g1_TRINITY_DN7105_c0_g1_i3_g_83505_m_83505;Nibbleromonas_arcticus|TRINITY_DN23382_c0_g1_TRINITY_DN23382_c0_g1_i1_…
cluster1985	GO:0016192; P:vesicle-mediated transport; IEA:InterPro	13	Q54TS4	Ancoracysta_twista|GFYU01000489_1_p1;Ancoracysta_twista|GFYU01010544_1_p1;Ancoracysta_twista|GFYU01011976_1_p1;Hemimastix_kukwesjijk|EP00696_Hemimastix_kukwesjijk_P007069;Meteora_sporadica|NODE_7986_length_985_cov_47_162338_g6574_i0;Nebulomonas_marisrubri|TRINITY_DN4802_c0_g1_TRINITY_DN4802_c0_g1_i1_g_30968_m_30968;Nibbleromonas_arcticus|TRINITY_DN4222_c0_g1_TRINITY_DN4222_c0_g1_i1_g_12537_m_1253…
cluster1987	GO:0006412; P:translation; TAS:TAIR	13	P42795	Ancoracysta_twista|GFYU01000508_1_p2;Hemimastix_kukwesjijk|EP00696_Hemimastix_kukwesjijk_P001356;Meteora_sporadica|NODE_10771_length_589_cov_2509_691288_g8407_i1;Nebulomonas_marisrubri|TRINITY_DN37696_c0_g1_TRINITY_DN37696_c0_g1_i1_g_14627_m_14627;Nebulomonas_marisrubri|TRINITY_DN9378_c0_g1_TRINITY_DN9378_c0_g1_i1_g_50914_m_50914;Nibbleromonas_arcticus|TRINITY_DN1275_c0_g1_TRINITY_DN1275_c0_g1_i1…
cluster1990	GO:0046907; P:intracellular transport; IEA:InterPro	13	Q3T0M7	Ancoracysta_twista|GFYU01000581_1_p1;Hemimastix_kukwesjijk|EP00696_Hemimastix_kukwesjijk_P008497;Hemimastix_kukwesjijk|EP00696_Hemimastix_kukwesjijk_P008498;Meteora_sporadica|NODE_10392_length_637_cov_94_751736_g8702_i0;Nebulomonas_marisrubri|TRINITY_DN12473_c1_g1_TRINITY_DN12473_c1_g1_i1_g_36974_m_36974;Nibbleromonas_arcticus|TRINITY_DN5208_c0_g1_TRINITY_DN5208_c0_g1_i1_g_41501_m_41501;Nibblerom…
cluster1991	GO:0006412; P:translation; IEA:InterPro	13	O65050	Ancoracysta_twista|GFYU01000584_1_p1;Hemimastix_kukwesjijk|EP00696_Hemimastix_kukwesjijk_P017403;Meteora_sporadica|NODE_6233_length_1296_cov_2134_700405_g5102_i0;Nebulomonas_marisrubri|TRINITY_DN40180_c0_g1_TRINITY_DN40180_c0_g1_i1_g_41177_m_41177;Nebulomonas_marisrubri|TRINITY_DN7055_c0_g1_TRINITY_DN7055_c0_g1_i1_g_33064_m_33064;Nibbleromonas_arcticus|TRINITY_DN3611_c0_g1_TRINITY_DN3611_c0_g1_i1…
cluster1992	GO:0009651; P:response to salt stress; IEP:TAIR	13	Q39258	Ancoracysta_twista|GFYU01000623_1_p2;Hemimastix_kukwesjijk|EP00696_Hemimastix_kukwesjijk_P007376;Meteora_sporadica|NODE_9196_length_791_cov_248_331507_g7625_i0;Nebulomonas_marisrubri|TRINITY_DN1226_c0_g1_TRINITY_DN1226_c0_g1_i1_g_58679_m_58679;Nebulomonas_marisrubri|TRINITY_DN1226_c0_g1_TRINITY_DN1226_c0_g1_i2_g_58681_m_58681;Nibbleromonas_arcticus|TRINITY_DN22532_c0_g1_TRINITY_DN22532_c0_g1_i1_g…
cluster1993	GO:0006890; P:retrograde vesicle-mediated transport, Golgi to ER; IEA:InterPro	13	Q9SA78	Ancoracysta_twista|GFYU01000761_1_p1;Hemimastix_kukwesjijk|EP00696_Hemimastix_kukwesjijk_P000679;Meteora_sporadica|NODE_8217_length_947_cov_28_897291_g6774_i0;Nebulomonas_marisrubri|TRINITY_DN278_c0_g1_TRINITY_DN278_c0_g1_i1_g_73041_m_73041;Nibbleromonas_arcticus|TRINITY_DN3010_c0_g1_TRINITY_DN3010_c0_g1_i1_g_39083_m_39083;Nibbleromonas_curacaus|TRINITY_DN17146_c0_g1_TRINITY_DN17146_c0_g1_i1_g_31…
cluster1994	GO:0006412; P:translation; IEA:InterPro	13	E2RKA8	Ancoracysta_twista|GFYU01000852_1_p1;Hemimastix_kukwesjijk|EP00696_Hemimastix_kukwesjijk_P011697;Meteora_sporadica|NODE_7074_length_1138_cov_1019_344475_g5811_i0;Nebulomonas_marisrubri|TRINITY_DN13325_c4_g1_TRINITY_DN13325_c4_g1_i4_g_74889_m_74889;Nebulomonas_marisrubri|TRINITY_DN34756_c0_g1_TRINITY_DN34756_c0_g1_i1_g_27596_m_27596;Nibbleromonas_arcticus|TRINITY_DN2318_c0_g1_TRINITY_DN2318_c0_g1_…
cluster1998	GO:0016192; P:vesicle-mediated transport; IEA:UniProtKB-KW	13	O04266	Ancoracysta_twista|GFYU01000887_1_p2;Ancoracysta_twista|GFYU01007886_1_p1;Hemimastix_kukwesjijk|EP00696_Hemimastix_kukwesjijk_P004100;Meteora_sporadica|NODE_9343_length_770_cov_249_029619_g7757_i0;Nebulomonas_marisrubri|TRINITY_DN4433_c0_g1_TRINITY_DN4433_c0_g1_i2_g_94994_m_94994;Nebulomonas_marisrubri|TRINITY_DN4433_c0_g1_TRINITY_DN4433_c0_g1_i5_g_94996_m_94996;Nibbleromonas_arcticus|TRINITY_DN1…
cluster2005	GO:0035494; P:SNARE complex disassembly; IEA:InterPro	13	Q9M0Y8	Ancoracysta_twista|GFYU01001126_1_p1;Hemimastix_kukwesjijk|EP00696_Hemimastix_kukwesjijk_P017115;Meteora_sporadica|NODE_3034_length_2202_cov_109_955628_g2460_i0;Nebulomonas_marisrubri|TRINITY_DN1862_c0_g1_TRINITY_DN1862_c0_g1_i1_g_18783_m_18783;Nibbleromonas_arcticus|TRINITY_DN1437_c0_g1_TRINITY_DN1437_c0_g1_i1_g_47546_m_47546;Nibbleromonas_curacaus|TRINITY_DN42152_c0_g1_TRINITY_DN42152_c0_g1_i1_…
cluster2007	GO:0000920; P:septum digestion after cytokinesis; IBA:GO_Central	13	O96552	Ancoracysta_twista|GFYU01001220_1_p1;Hemimastix_kukwesjijk|EP00696_Hemimastix_kukwesjijk_P001752;Hemimastix_kukwesjijk|EP00696_Hemimastix_kukwesjijk_P001755;Meteora_sporadica|NODE_9378_length_766_cov_35_638298_g7788_i0;Nebulomonas_marisrubri|TRINITY_DN5557_c0_g1_TRINITY_DN5557_c0_g1_i1_g_59348_m_59348;Nebulomonas_marisrubri|TRINITY_DN5557_c0_g1_TRINITY_DN5557_c0_g1_i2_g_59349_m_59349;Nibbleromona…
cluster2008	GO:0006412; P:translation; IBA:GO_Central	13	Q5E988	Ancoracysta_twista|GFYU01001232_1_p1;Hemimastix_kukwesjijk|EP00696_Hemimastix_kukwesjijk_P010094;Meteora_sporadica|NODE_5049_length_1543_cov_1022_375843_g4091_i0;Nebulomonas_marisrubri|TRINITY_DN34482_c0_g1_TRINITY_DN34482_c0_g1_i1_g_28920_m_28920;Nebulomonas_marisrubri|TRINITY_DN5263_c0_g1_TRINITY_DN5263_c0_g1_i1_g_51165_m_51165;Nibbleromonas_arcticus|TRINITY_DN277_c0_g1_TRINITY_DN277_c0_g1_i1_g…
cluster2011	GO:0006364; P:rRNA processing; IBA:GO_Central	13	Q9D0I8	Ancoracysta_twista|GFYU01001395_1_p1;Hemimastix_kukwesjijk|EP00696_Hemimastix_kukwesjijk_P012220;Meteora_sporadica|NODE_4261_length_1752_cov_72_426375_g3454_i0;Meteora_sporadica|NODE_4479_length_1690_cov_79_867403_g3454_i1;Nebulomonas_marisrubri|TRINITY_DN4561_c0_g1_TRINITY_DN4561_c0_g1_i1_g_51911_m_51911;Nibbleromonas_arcticus|TRINITY_DN8878_c0_g1_TRINITY_DN8878_c0_g1_i1_g_30790_m_30790;Nibblero…
cluster2014	GO:0036503; P:ERAD pathway; IBA:GO_Central	13	Q9SEI3	Ancoracysta_twista|GFYU01001477_1_p1;Hemimastix_kukwesjijk|EP00696_Hemimastix_kukwesjijk_P012678;Meteora_sporadica|NODE_6473_length_1256_cov_62_822594_g5305_i0;Nebulomonas_marisrubri|TRINITY_DN12848_c1_g1_TRINITY_DN12848_c1_g1_i1_g_6092_m_6092;Nebulomonas_marisrubri|TRINITY_DN7391_c0_g1_TRINITY_DN7391_c0_g1_i1_g_20048_m_20048;Nibbleromonas_arcticus|TRINITY_DN4097_c0_g1_TRINITY_DN4097_c0_g1_i1_g_1…
cluster2017	GO:0006412; P:translation; IEA:InterPro	13	O65059	Ancoracysta_twista|GFYU01001665_1_p2;Ancoracysta_twista|GFYU01002356_1_p1;Hemimastix_kukwesjijk|EP00696_Hemimastix_kukwesjijk_P016652;Meteora_sporadica|NODE_9544_length_743_cov_3237_347507_g7936_i0;Nebulomonas_marisrubri|TRINITY_DN5309_c0_g1_TRINITY_DN5309_c0_g1_i2_g_72841_m_72841;Nebulomonas_marisrubri|TRINITY_DN6488_c0_g2_TRINITY_DN6488_c0_g2_i1_g_53199_m_53199;Nibbleromonas_arcticus|TRINITY_DN…
cluster2019	GO:0060296; P:regulation of cilium beat frequency involved in ciliary motility; IMP:UniProtKB	13	A0CDD4	Ancoracysta_twista|GFYU01001732_1_p1;Ancoracysta_twista|GFYU01004244_1_p2;Hemimastix_kukwesjijk|EP00696_Hemimastix_kukwesjijk_P010950;Meteora_sporadica|NODE_9674_length_729_cov_12_603293_g8050_i0;Nebulomonas_marisrubri|TRINITY_DN3946_c0_g1_TRINITY_DN3946_c0_g1_i1_g_37376_m_37376;Nibbleromonas_arcticus|TRINITY_DN251_c0_g1_TRINITY_DN251_c0_g1_i1_g_3060_m_3060;Nibbleromonas_arcticus|TRINITY_DN4563_c…
cluster2023	GO:0006635; P:fatty acid beta-oxidation; IEA:UniProtKB-UniPathway	13	O35459	Ancoracysta_twista|GFYU01001997_1_p1;Hemimastix_kukwesjijk|EP00696_Hemimastix_kukwesjijk_P000036;Meteora_sporadica|NODE_8666_length_874_cov_19_730627_g7163_i0;Nebulomonas_marisrubri|TRINITY_DN8656_c0_g1_TRINITY_DN8656_c0_g1_i1_g_61030_m_61030;Nibbleromonas_arcticus|TRINITY_DN5331_c0_g1_TRINITY_DN5331_c0_g1_i1_g_43150_m_43150;Nibbleromonas_curacaus|TRINITY_DN31031_c0_g1_TRINITY_DN31031_c0_g1_i1_g_…
cluster2032	GO:0070979; P:protein K11-linked ubiquitination; IBA:GO_Central	13	Q55ER5	Ancoracysta_twista|GFYU01002662_1_p1;Ancoracysta_twista|GFYU01013390_1_p1;Hemimastix_kukwesjijk|EP00696_Hemimastix_kukwesjijk_P002025;Meteora_sporadica|NODE_10755_length_592_cov_7_638418_g9041_i0;Nebulomonas_marisrubri|TRINITY_DN14225_c2_g6_TRINITY_DN14225_c2_g6_i1_g_23384_m_23384;Nebulomonas_marisrubri|TRINITY_DN5850_c0_g1_TRINITY_DN5850_c0_g1_i1_g_34593_m_34593;Nibbleromonas_arcticus|TRINITY_DN…
cluster2033	GO:0000387; P:spliceosomal snRNP assembly; ISS:UniProtKB	13	Q5E959	Ancoracysta_twista|GFYU01002681_1_p1;Hemimastix_kukwesjijk|EP00696_Hemimastix_kukwesjijk_P015288;Meteora_sporadica|NODE_3137_length_2156_cov_46_157041_g2546_i0;Nebulomonas_marisrubri|TRINITY_DN6439_c0_g1_TRINITY_DN6439_c0_g1_i1_g_53301_m_53301;Nibbleromonas_arcticus|TRINITY_DN11558_c0_g1_TRINITY_DN11558_c0_g1_i1_g_38909_m_38909;Nibbleromonas_curacaus|TRINITY_DN19162_c0_g1_TRINITY_DN19162_c0_g1_i1…
cluster2034	GO:1902610; P:response to N-phenylthiourea; IMP:dictyBase	13	P36408	Ancoracysta_twista|GFYU01002741_1_p1;Hemimastix_kukwesjijk|EP00696_Hemimastix_kukwesjijk_P013783;Meteora_sporadica|NODE_3942_length_1854_cov_287_728946_g3199_i0;Meteora_sporadica|NODE_5446_length_1452_cov_496_069015_g3199_i1;Nebulomonas_marisrubri|TRINITY_DN13554_c0_g1_TRINITY_DN13554_c0_g1_i1_g_89638_m_89638;Nibbleromonas_arcticus|TRINITY_DN2854_c0_g1_TRINITY_DN2854_c0_g1_i1_g_8832_m_8832;Nibble…
cluster2038	GO:0009651; P:response to salt stress; IEP:TAIR	13	Q9LXC9	Ancoracysta_twista|GFYU01002905_1_p1;Ancoracysta_twista|GFYU01019818_1_p1;Hemimastix_kukwesjijk|EP00696_Hemimastix_kukwesjijk_P009172;Meteora_sporadica|NODE_5564_length_1427_cov_24_688141_g4524_i0;Nebulomonas_marisrubri|TRINITY_DN11404_c0_g1_TRINITY_DN11404_c0_g1_i1_g_26555_m_26555;Nibbleromonas_arcticus|TRINITY_DN734_c0_g1_TRINITY_DN734_c0_g1_i1_g_30123_m_30123;Nibbleromonas_curacaus|TRINITY_DN1…
cluster2041	GO:0006511; P:ubiquitin-dependent protein catabolic process; IMP:TAIR	13	Q8W206	Ancoracysta_twista|GFYU01003103_1_p1;Hemimastix_kukwesjijk|EP00696_Hemimastix_kukwesjijk_P013246;Meteora_sporadica|NODE_12939_length_373_cov_85_227564_g11176_i0;Meteora_sporadica|NODE_6805_length_1189_cov_379_134752_g5583_i0;Nebulomonas_marisrubri|TRINITY_DN10641_c0_g1_TRINITY_DN10641_c0_g1_i1_g_44841_m_44841;Nibbleromonas_arcticus|TRINITY_DN23107_c0_g1_TRINITY_DN23107_c0_g1_i1_g_49891_m_49891;Ni…
cluster2045	GO:0015031; P:protein transport; IEA:UniProtKB-KW	13	Q54JI9	Ancoracysta_twista|GFYU01003379_1_p1;Ancoracysta_twista|GFYU01005830_1_p1;Hemimastix_kukwesjijk|EP00696_Hemimastix_kukwesjijk_P007306;Meteora_sporadica|NODE_5550_length_1429_cov_80_008772_g4513_i0;Nebulomonas_marisrubri|TRINITY_DN29071_c0_g1_TRINITY_DN29071_c0_g1_i1_g_94118_m_94118;Nibbleromonas_arcticus|TRINITY_DN5000_c0_g1_TRINITY_DN5000_c0_g1_i1_g_44008_m_44008;Nibbleromonas_curacaus|TRINITY_D…
cluster2046	GO:0006099; P:tricarboxylic acid cycle; IEA:UniProtKB-UniPathway	13	O80433	Ancoracysta_twista|GFYU01003400_1_p1;Hemimastix_kukwesjijk|EP00696_Hemimastix_kukwesjijk_P018431;Meteora_sporadica|NODE_2272_length_2624_cov_32_057355_g1841_i0;Nebulomonas_marisrubri|TRINITY_DN2200_c0_g1_TRINITY_DN2200_c0_g1_i1_g_31665_m_31665;Nibbleromonas_arcticus|TRINITY_DN15370_c0_g1_TRINITY_DN15370_c0_g1_i1_g_40076_m_40076;Nibbleromonas_curacaus|TRINITY_DN4479_c0_g2_TRINITY_DN4479_c0_g2_i1_g…
cluster2050	GO:0048280; P:vesicle fusion with Golgi apparatus; IDA:RGD	13	Q08851	Ancoracysta_twista|GFYU01003583_1_p1;Hemimastix_kukwesjijk|EP00696_Hemimastix_kukwesjijk_P010767;Meteora_sporadica|NODE_7375_length_1087_cov_30_931774_g6051_i0;Nebulomonas_marisrubri|TRINITY_DN32651_c0_g1_TRINITY_DN32651_c0_g1_i1_g_33787_m_33787;Nibbleromonas_arcticus|TRINITY_DN23092_c0_g1_TRINITY_DN23092_c0_g1_i1_g_54002_m_54002;Nibbleromonas_arcticus|TRINITY_DN5923_c0_g1_TRINITY_DN5923_c0_g1_i1…
cluster2052	GO:0070213; P:protein auto-ADP-ribosylation; ISO:MGI	13	Q7TMM8	Ancoracysta_twista|GFYU01003678_1_p1;Hemimastix_kukwesjijk|EP00696_Hemimastix_kukwesjijk_P019504;Hemimastix_kukwesjijk|EP00696_Hemimastix_kukwesjijk_P019506;Hemimastix_kukwesjijk|EP00696_Hemimastix_kukwesjijk_P019507;Meteora_sporadica|NODE_5945_length_1351_cov_13_381395_g4850_i0;Nebulomonas_marisrubri|TRINITY_DN37588_c0_g1_TRINITY_DN37588_c0_g1_i1_g_65086_m_65086;Nibbleromonas_arcticus|TRINITY_DN…
cluster2054	GO:0031419; F:cobalamin binding; IEA:UniProtKB-KW	13	Q5PR61	Ancoracysta_twista|GFYU01003801_1_p1;Hemimastix_kukwesjijk|EP00696_Hemimastix_kukwesjijk_P011687;Meteora_sporadica|NODE_4786_length_1608_cov_16_742728_g3878_i0;Nebulomonas_marisrubri|TRINITY_DN10568_c0_g1_TRINITY_DN10568_c0_g1_i1_g_94445_m_94445;Nibbleromonas_arcticus|TRINITY_DN13726_c0_g1_TRINITY_DN13726_c0_g1_i1_g_27670_m_27670;Nibbleromonas_arcticus|TRINITY_DN18495_c0_g1_TRINITY_DN18495_c0_g1_…
cluster2055	GO:0009585; P:red, far-red light phototransduction; IEA:UniProtKB-KW	13	Q8W207	Ancoracysta_twista|GFYU01003860_1_p1;Hemimastix_kukwesjijk|EP00696_Hemimastix_kukwesjijk_P000050;Meteora_sporadica|NODE_4468_length_1692_cov_320_004905_g3620_i0;Meteora_sporadica|NODE_5206_length_1502_cov_400_843164_g3620_i1;Nebulomonas_marisrubri|TRINITY_DN10668_c0_g1_TRINITY_DN10668_c0_g1_i1_g_44729_m_44729;Nibbleromonas_arcticus|TRINITY_DN384_c0_g1_TRINITY_DN384_c0_g1_i1_g_11600_m_11600;Nibble…
cluster2056	GO:0034314; P:Arp2/3 complex-mediated actin nucleation; IEA:InterPro	13	Q0IH88	Ancoracysta_twista|GFYU01004051_1_p1;Hemimastix_kukwesjijk|EP00696_Hemimastix_kukwesjijk_P013678;Meteora_sporadica|NODE_8234_length_943_cov_316_976190_g6790_i0;Nebulomonas_marisrubri|TRINITY_DN11438_c0_g1_TRINITY_DN11438_c0_g1_i3_g_26426_m_26426;Nebulomonas_marisrubri|TRINITY_DN32504_c0_g1_TRINITY_DN32504_c0_g1_i1_g_50975_m_50975;Nibbleromonas_arcticus|TRINITY_DN202_c0_g1_TRINITY_DN202_c0_g1_i1_g…
cluster2067	GO:0006183; P:GTP biosynthetic process; IBA:GO_Central	13	Q54QQ0	Ancoracysta_twista|GFYU01005135_1_p1;Hemimastix_kukwesjijk|EP00696_Hemimastix_kukwesjijk_P016507;Meteora_sporadica|NODE_3067_length_2185_cov_126_040019_g2491_i0;Meteora_sporadica|NODE_4517_length_1677_cov_6_389851_g3662_i0;Nebulomonas_marisrubri|TRINITY_DN4242_c0_g1_TRINITY_DN4242_c0_g1_i1_g_6904_m_6904;Nibbleromonas_arcticus|TRINITY_DN16536_c0_g1_TRINITY_DN16536_c0_g1_i1_g_47426_m_47426;Nibblero…
cluster2072	GO:0017148; P:negative regulation of translation; ISO:MGI	13	Q8BMB3	Ancoracysta_twista|GFYU01005641_1_p1;Ancoracysta_twista|GFYU01010603_1_p1;Hemimastix_kukwesjijk|EP00696_Hemimastix_kukwesjijk_P005097;Meteora_sporadica|NODE_7765_length_1021_cov_52_893750_g6390_i0;Nebulomonas_marisrubri|TRINITY_DN492_c0_g1_TRINITY_DN492_c0_g1_i1_g_79936_m_79936;Nibbleromonas_arcticus|TRINITY_DN9851_c0_g1_TRINITY_DN9851_c0_g1_i1_g_5814_m_5814;Nibbleromonas_curacaus|TRINITY_DN9549_…
cluster2077	GO:0010506; P:regulation of autophagy; IBA:GO_Central	13	Q54IK1	Ancoracysta_twista|GFYU01006215_1_p1;Hemimastix_kukwesjijk|EP00696_Hemimastix_kukwesjijk_P003558;Meteora_sporadica|NODE_7227_length_1110_cov_48_957102_g5934_i0;Nebulomonas_marisrubri|TRINITY_DN13421_c0_g1_TRINITY_DN13421_c0_g1_i1_g_82000_m_82000;Nebulomonas_marisrubri|TRINITY_DN13421_c0_g1_TRINITY_DN13421_c0_g1_i3_g_82001_m_82001;Nibbleromonas_arcticus|TRINITY_DN17183_c0_g1_TRINITY_DN17183_c0_g1_…
cluster2078	GO:0001732; P:formation of cytoplasmic translation initiation complex; IEA:UniProtKB-UniRule	13	Q54KI0	Ancoracysta_twista|GFYU01006297_1_p2;Hemimastix_kukwesjijk|EP00696_Hemimastix_kukwesjijk_P011320;Meteora_sporadica|NODE_9124_length_801_cov_29_598649_g7563_i0;Nebulomonas_marisrubri|TRINITY_DN6587_c0_g1_TRINITY_DN6587_c0_g1_i1_g_35671_m_35671;Nibbleromonas_arcticus|TRINITY_DN25335_c0_g1_TRINITY_DN25335_c0_g1_i1_g_52891_m_52891;Nibbleromonas_curacaus|TRINITY_DN8976_c0_g1_TRINITY_DN8976_c0_g1_i2_g_…
cluster2089	GO:0072659; P:protein localization to plasma membrane; IBA:GO_Central	13	Q54MC0	Ancoracysta_twista|GFYU01007578_1_p1;Hemimastix_kukwesjijk|EP00696_Hemimastix_kukwesjijk_P014421;Meteora_sporadica|NODE_5227_length_1499_cov_5_235744_g4240_i0;Nebulomonas_marisrubri|TRINITY_DN23494_c0_g1_TRINITY_DN23494_c0_g1_i1_g_83645_m_83645;Nibbleromonas_arcticus|TRINITY_DN5002_c0_g1_TRINITY_DN5002_c0_g1_i1_g_43987_m_43987;Nibbleromonas_curacaus|TRINITY_DN2714_c0_g1_TRINITY_DN2714_c0_g1_i2_g_…
cluster2092	GO:0006123; P:mitochondrial electron transport, cytochrome c to oxygen; IBA:GO_Central	13	Q9SSB8	Ancoracysta_twista|GFYU01007775_1_p1;Hemimastix_kukwesjijk|EP00696_Hemimastix_kukwesjijk_P015584;Hemimastix_kukwesjijk|EP00696_Hemimastix_kukwesjijk_P015594;Meteora_sporadica|NODE_11753_length_481_cov_69_085714_g9996_i0;Nebulomonas_marisrubri|TRINITY_DN10660_c0_g1_TRINITY_DN10660_c0_g1_i1_g_44770_m_44770;Nebulomonas_marisrubri|TRINITY_DN10660_c0_g1_TRINITY_DN10660_c0_g1_i2_g_44772_m_44772;Nibbler…
cluster2097	GO:0032469; P:endoplasmic reticulum calcium ion homeostasis; IDA:UniProtKB	13	Q19714	Ancoracysta_twista|GFYU01008604_1_p1;Hemimastix_kukwesjijk|EP00696_Hemimastix_kukwesjijk_P014371;Meteora_sporadica|NODE_10780_length_589_cov_11_089015_g9063_i0;Nebulomonas_marisrubri|TRINITY_DN37328_c0_g1_TRINITY_DN37328_c0_g1_i1_g_38089_m_38089;Nibbleromonas_arcticus|TRINITY_DN23874_c0_g1_TRINITY_DN23874_c0_g1_i1_g_44205_m_44205;Nibbleromonas_curacaus|TRINITY_DN12074_c0_g1_TRINITY_DN12074_c0_g1_…
cluster2098	GO:0042254; P:ribosome biogenesis; IEA:UniProtKB-KW	13	Q9D6Z1	Ancoracysta_twista|GFYU01008773_1_p1;Ancoracysta_twista|GFYU01030184_1_p1;Hemimastix_kukwesjijk|EP00696_Hemimastix_kukwesjijk_P007509;Hemimastix_kukwesjijk|EP00696_Hemimastix_kukwesjijk_P007510;Meteora_sporadica|NODE_4800_length_1606_cov_47_838835_g3889_i0;Nebulomonas_marisrubri|TRINITY_DN14118_c3_g4_TRINITY_DN14118_c3_g4_i1_g_86353_m_86353;Nibbleromonas_arcticus|TRINITY_DN5193_c0_g1_TRINITY_DN51…
cluster2102	GO:0016788; F:hydrolase activity, acting on ester bonds; ISM:PomBase	13	P54069	Ancoracysta_twista|GFYU01009480_1_p1;Ancoracysta_twista|GFYU01032574_1_p1;Hemimastix_kukwesjijk|EP00696_Hemimastix_kukwesjijk_P012271;Meteora_sporadica|NODE_7188_length_1119_cov_30_638941_g5902_i0;Meteora_sporadica|NODE_7648_length_1039_cov_34_319018_g5902_i1;Nebulomonas_marisrubri|TRINITY_DN1161_c0_g1_TRINITY_DN1161_c0_g1_i1_g_58159_m_58159;Nibbleromonas_arcticus|TRINITY_DN2589_c0_g1_TRINITY_DN2…
cluster2108	GO:0008380; P:RNA splicing; IEA:UniProtKB-KW	13	Q5EAV6	Ancoracysta_twista|GFYU01010539_1_p2;Hemimastix_kukwesjijk|EP00696_Hemimastix_kukwesjijk_P018917;Hemimastix_kukwesjijk|EP00696_Hemimastix_kukwesjijk_P018920;Meteora_sporadica|NODE_7009_length_1150_cov_41_502296_g5757_i0;Nebulomonas_marisrubri|TRINITY_DN10798_c0_g1_TRINITY_DN10798_c0_g1_i3_g_41465_m_41465;Nibbleromonas_arcticus|TRINITY_DN24594_c0_g1_TRINITY_DN24594_c0_g1_i1_g_52677_m_52677;Nibbler…
cluster2110	GO:0000079; P:regulation of cyclin-dependent protein serine/threonine kinase activity; IEA:InterPro	13	O80513	Ancoracysta_twista|GFYU01010676_1_p1;Hemimastix_kukwesjijk|EP00696_Hemimastix_kukwesjijk_P005125;Hemimastix_kukwesjijk|EP00696_Hemimastix_kukwesjijk_P016450;Meteora_sporadica|NODE_5069_length_1539_cov_1399_029093_g4109_i0;Nebulomonas_marisrubri|TRINITY_DN10_c0_g1_TRINITY_DN10_c0_g1_i1_g_18047_m_18047;Nibbleromonas_arcticus|TRINITY_DN4324_c0_g1_TRINITY_DN4324_c0_g1_i1_g_35389_m_35389;Nibbleromonas…
cluster2117	GO:0036498; P:IRE1-mediated unfolded protein response; TAS:Reactome	13	Q9Y5M8	Ancoracysta_twista|GFYU01012079_1_p1;Hemimastix_kukwesjijk|EP00696_Hemimastix_kukwesjijk_P005071;Meteora_sporadica|NODE_9424_length_760_cov_27_692418_g7832_i0;Nebulomonas_marisrubri|TRINITY_DN10009_c0_g1_TRINITY_DN10009_c0_g1_i1_g_80820_m_80820;Nebulomonas_marisrubri|TRINITY_DN10009_c0_g1_TRINITY_DN10009_c0_g1_i2_g_80826_m_80826;Nibbleromonas_arcticus|TRINITY_DN11851_c0_g1_TRINITY_DN11851_c0_g1_i…
cluster2118	GO:0006546; P:glycine catabolic process; IEA:InterPro	13	P93256	Ancoracysta_twista|GFYU01012151_1_p1;Ancoracysta_twista|GFYU01039762_1_p2;Hemimastix_kukwesjijk|EP00696_Hemimastix_kukwesjijk_P014614;Meteora_sporadica|NODE_5595_length_1420_cov_6_080206_g4549_i0;Meteora_sporadica|NODE_5971_length_1346_cov_14_714397_g4874_i0;Nebulomonas_marisrubri|TRINITY_DN11858_c0_g1_TRINITY_DN11858_c0_g1_i2_g_38325_m_38325;Nibbleromonas_arcticus|TRINITY_DN3663_c0_g1_TRINITY_DN…
cluster2121	GO:0042493; P:response to drug; IDA:dictyBase	13	Q9NH03	Ancoracysta_twista|GFYU01012274_1_p1;Hemimastix_kukwesjijk|EP00696_Hemimastix_kukwesjijk_P019737;Meteora_sporadica|NODE_7386_length_1086_cov_7_440976_g6061_i0;Nebulomonas_marisrubri|TRINITY_DN10483_c0_g1_TRINITY_DN10483_c0_g1_i1_g_18541_m_18541;Nebulomonas_marisrubri|TRINITY_DN11224_c0_g1_TRINITY_DN11224_c0_g1_i1_g_63197_m_63197;Nibbleromonas_arcticus|TRINITY_DN9030_c0_g1_TRINITY_DN9030_c0_g1_i1_…
cluster2124	GO:0006487; P:protein N-linked glycosylation; ISS:dictyBase	13	Q54NM9	Ancoracysta_twista|GFYU01012547_1_p1;Ancoracysta_twista|GFYU01018680_1_p1;Hemimastix_kukwesjijk|EP00696_Hemimastix_kukwesjijk_P006942;Meteora_sporadica|NODE_2829_length_2302_cov_167_390004_g2290_i0;Nebulomonas_marisrubri|TRINITY_DN8398_c0_g1_TRINITY_DN8398_c0_g1_i1_g_60295_m_60295;Nibbleromonas_arcticus|TRINITY_DN8384_c0_g1_TRINITY_DN8384_c0_g1_i1_g_50750_m_50750;Nibbleromonas_curacaus|TRINITY_DN…
cluster2128	GO:0009651; P:response to salt stress; IDA:UniProtKB	13	Q9SA73	Ancoracysta_twista|GFYU01012837_1_p2;Hemimastix_kukwesjijk|EP00696_Hemimastix_kukwesjijk_P001828;Meteora_sporadica|NODE_2888_length_2273_cov_62_586347_g2338_i0;Meteora_sporadica|NODE_3101_length_2174_cov_68_662565_g2338_i1;Meteora_sporadica|NODE_3775_length_1918_cov_59_153473_g2338_i2;Nebulomonas_marisrubri|TRINITY_DN6254_c0_g1_TRINITY_DN6254_c0_g1_i1_g_76260_m_76260;Nibbleromonas_arcticus|TRINIT…
cluster2131	GO:0019518; P:L-threonine catabolic process to glycine; IEA:UniProtKB-UniPathway	13	O88986	Ancoracysta_twista|GFYU01013032_1_p1;Hemimastix_kukwesjijk|EP00696_Hemimastix_kukwesjijk_P012942;Hemimastix_kukwesjijk|EP00696_Hemimastix_kukwesjijk_P012949;Meteora_sporadica|NODE_5586_length_1422_cov_19_911095_g4541_i0;Nebulomonas_marisrubri|TRINITY_DN9943_c0_g1_TRINITY_DN9943_c0_g1_i1_g_12445_m_12445;Nibbleromonas_arcticus|TRINITY_DN23597_c0_g1_TRINITY_DN23597_c0_g1_i1_g_48147_m_48147;Nibblerom…
cluster2133	GO:0001113; P:transcriptional open complex formation at RNA polymerase II promoter; IBA:GO_Central	13	Q9P3W1	Ancoracysta_twista|GFYU01013227_1_p1;Hemimastix_kukwesjijk|EP00696_Hemimastix_kukwesjijk_P007100;Meteora_sporadica|NODE_3840_length_1895_cov_53_978735_g3117_i0;Meteora_sporadica|NODE_4522_length_1676_cov_62_517647_g3117_i1;Nebulomonas_marisrubri|TRINITY_DN3558_c0_g1_TRINITY_DN3558_c0_g1_i1_g_85655_m_85655;Nibbleromonas_arcticus|TRINITY_DN24179_c0_g1_TRINITY_DN24179_c0_g1_i1_g_21717_m_21717;Nibble…
cluster2134	GO:2000049; P:positive regulation of cell-cell adhesion mediated by cadherin; ISS:UniProtKB	13	Q8BH65	Ancoracysta_twista|GFYU01013230_1_p1;Hemimastix_kukwesjijk|EP00696_Hemimastix_kukwesjijk_P002065;Meteora_sporadica|NODE_1316_length_3395_cov_58_124175_g1075_i0;Meteora_sporadica|NODE_4109_length_1797_cov_50_632488_g1075_i1;Nebulomonas_marisrubri|TRINITY_DN14489_c0_g1_TRINITY_DN14489_c0_g1_i1_g_30579_m_30579;Nibbleromonas_arcticus|TRINITY_DN2273_c0_g1_TRINITY_DN2273_c0_g1_i1_g_9748_m_9748;Nibblero…
cluster2138	GO:0003723; F:RNA binding; IEA:UniProtKB-KW	13	Q0INC5	Ancoracysta_twista|GFYU01013557_1_p1;Hemimastix_kukwesjijk|EP00696_Hemimastix_kukwesjijk_P018414;Meteora_sporadica|NODE_8840_length_845_cov_4_719388_g7311_i0;Meteora_sporadica|NODE_8841_length_845_cov_3_473214_g7312_i0;Nebulomonas_marisrubri|TRINITY_DN113_c0_g1_TRINITY_DN113_c0_g1_i1_g_165_m_165;Nibbleromonas_arcticus|TRINITY_DN10395_c0_g1_TRINITY_DN10395_c0_g1_i1_g_14520_m_14520;Nibbleromonas_ar…
cluster2139	GO:0006572; P:tyrosine catabolic process; TAS:MGI	13	Q9WVL0	Ancoracysta_twista|GFYU01013874_1_p1;Hemimastix_kukwesjijk|EP00696_Hemimastix_kukwesjijk_P010133;Meteora_sporadica|NODE_10065_length_680_cov_58_021002_g8408_i0;Nebulomonas_marisrubri|TRINITY_DN11798_c0_g1_TRINITY_DN11798_c0_g1_i2_g_25393_m_25393;Nebulomonas_marisrubri|TRINITY_DN38400_c0_g1_TRINITY_DN38400_c0_g1_i1_g_19644_m_19644;Nibbleromonas_arcticus|TRINITY_DN15372_c0_g1_TRINITY_DN15372_c0_g1_…
cluster2148	GO:0016255; P:attachment of GPI anchor to protein; IEA:InterPro	13	Q6PD26	Ancoracysta_twista|GFYU01015571_1_p1;Hemimastix_kukwesjijk|EP00696_Hemimastix_kukwesjijk_P007999;Hemimastix_kukwesjijk|EP00696_Hemimastix_kukwesjijk_P008984;Meteora_sporadica|NODE_7214_length_1114_cov_18_762583_g5922_i0;Nebulomonas_marisrubri|TRINITY_DN13408_c0_g1_TRINITY_DN13408_c0_g1_i1_g_82840_m_82840;Nibbleromonas_arcticus|TRINITY_DN382_c0_g1_TRINITY_DN382_c0_g1_i1_g_11654_m_11654;Nibbleromon…
cluster2149	GO:0006425; P:glutaminyl-tRNA aminoacylation; ISS:dictyBase	13	P14325	Ancoracysta_twista|GFYU01015633_1_p1;Ancoracysta_twista|GFYU01027345_1_p1;Hemimastix_kukwesjijk|EP00696_Hemimastix_kukwesjijk_P016074;Hemimastix_kukwesjijk|EP00696_Hemimastix_kukwesjijk_P016075;Meteora_sporadica|NODE_2507_length_2471_cov_98_555187_g2031_i0;Nebulomonas_marisrubri|TRINITY_DN13082_c0_g1_TRINITY_DN13082_c0_g1_i1_g_93597_m_93597;Nibbleromonas_arcticus|TRINITY_DN21075_c0_g1_TRINITY_DN2…
cluster2150	GO:0007021; P:tubulin complex assembly; IBA:GO_Central	13	P61759	Ancoracysta_twista|GFYU01015768_1_p1;Hemimastix_kukwesjijk|EP00696_Hemimastix_kukwesjijk_P014306;Meteora_sporadica|NODE_9735_length_722_cov_26_190620_g8108_i0;Nebulomonas_marisrubri|TRINITY_DN5800_c0_g1_TRINITY_DN5800_c0_g1_i1_g_16215_m_16215;Nibbleromonas_arcticus|TRINITY_DN9619_c0_g1_TRINITY_DN9619_c0_g1_i1_g_15933_m_15933;Nibbleromonas_curacaus|TRINITY_DN6483_c0_g1_TRINITY_DN6483_c0_g1_i1_g_64…
cluster2152	GO:0010228; P:vegetative to reproductive phase transition of meristem; IMP:TAIR	13	Q9SR06	Ancoracysta_twista|GFYU01016107_1_p1;Ancoracysta_twista|GFYU01023236_1_p1;Hemimastix_kukwesjijk|EP00696_Hemimastix_kukwesjijk_P013292;Meteora_sporadica|NODE_5488_length_1443_cov_25_586107_g4458_i0;Nebulomonas_marisrubri|TRINITY_DN5937_c0_g1_TRINITY_DN5937_c0_g1_i1_g_58879_m_58879;Nibbleromonas_arcticus|TRINITY_DN26445_c0_g1_TRINITY_DN26445_c0_g1_i1_g_23848_m_23848;Nibbleromonas_arcticus|TRINITY_D…
cluster2154	GO:0008380; P:RNA splicing; TAS:ProtInc	13	O60508	Ancoracysta_twista|GFYU01016528_1_p1;Hemimastix_kukwesjijk|EP00696_Hemimastix_kukwesjijk_P013430;Meteora_sporadica|NODE_4254_length_1755_cov_47_978158_g3448_i0;Nebulomonas_marisrubri|TRINITY_DN6600_c0_g1_TRINITY_DN6600_c0_g1_i1_g_35533_m_35533;Nibbleromonas_arcticus|TRINITY_DN16511_c0_g1_TRINITY_DN16511_c0_g1_i1_g_47382_m_47382;Nibbleromonas_curacaus|TRINITY_DN13053_c0_g1_TRINITY_DN13053_c0_g1_i2…
cluster2155	N/A	13	A8E7G4	Ancoracysta_twista|GFYU01016667_1_p1;Hemimastix_kukwesjijk|EP00696_Hemimastix_kukwesjijk_P013595;Hemimastix_kukwesjijk|EP00696_Hemimastix_kukwesjijk_P013596;Meteora_sporadica|NODE_7047_length_1143_cov_109_185767_g5788_i0;Meteora_sporadica|NODE_9275_length_779_cov_78_519499_g5788_i1;Nebulomonas_marisrubri|TRINITY_DN10507_c0_g1_TRINITY_DN10507_c0_g1_i3_g_94427_m_94427;Nibbleromonas_arcticus|TRINITY…
cluster2157	GO:0006012; P:galactose metabolic process; IEA:InterPro	13	Q5R6J8	Ancoracysta_twista|GFYU01016857_1_p1;Hemimastix_kukwesjijk|EP00696_Hemimastix_kukwesjijk_P019412;Meteora_sporadica|NODE_5334_length_1477_cov_4_945621_g4332_i0;Nebulomonas_marisrubri|TRINITY_DN11781_c0_g1_TRINITY_DN11781_c0_g1_i1_g_25610_m_25610;Nibbleromonas_arcticus|TRINITY_DN6040_c0_g1_TRINITY_DN6040_c0_g1_i1_g_45167_m_45167;Nibbleromonas_arcticus|TRINITY_DN6816_c0_g1_TRINITY_DN6816_c0_g1_i1_g_…
cluster2158	GO:0019464; P:glycine decarboxylation via glycine cleavage system; IEA:UniProtKB-UniRule	13	B2J427	Ancoracysta_twista|GFYU01017051_1_p1;Hemimastix_kukwesjijk|EP00696_Hemimastix_kukwesjijk_P017605;Meteora_sporadica|NODE_1625_length_3072_cov_6_847891_g1329_i0;Nebulomonas_marisrubri|TRINITY_DN11472_c0_g1_TRINITY_DN11472_c0_g1_i1_g_26588_m_26588;Nibbleromonas_arcticus|TRINITY_DN9684_c0_g1_TRINITY_DN9684_c0_g1_i1_g_15883_m_15883;Nibbleromonas_curacaus|TRINITY_DN3281_c0_g1_TRINITY_DN3281_c0_g1_i2_g_…
cluster2162	GO:0000375; P:RNA splicing, via transesterification reactions; IDA:UniProtKB	13	Q9BRX9	Ancoracysta_twista|GFYU01017972_1_p1;Hemimastix_kukwesjijk|EP00696_Hemimastix_kukwesjijk_P012927;Hemimastix_kukwesjijk|EP00696_Hemimastix_kukwesjijk_P012928;Meteora_sporadica|NODE_7049_length_1143_cov_31_032348_g5789_i0;Nebulomonas_marisrubri|TRINITY_DN4309_c0_g1_TRINITY_DN4309_c0_g1_i2_g_52646_m_52646;Nibbleromonas_arcticus|TRINITY_DN11697_c0_g1_TRINITY_DN11697_c0_g1_i1_g_28440_m_28440;Nibblerom…
cluster2181	GO:0002181; P:cytoplasmic translation; IBA:GO_Central	13	Q54DA5	Ancoracysta_twista|GFYU01022428_1_p1;Hemimastix_kukwesjijk|EP00696_Hemimastix_kukwesjijk_P017218;Hemimastix_kukwesjijk|EP00696_Hemimastix_kukwesjijk_P017219;Hemimastix_kukwesjijk|EP00696_Hemimastix_kukwesjijk_P017222;Meteora_sporadica|NODE_6380_length_1270_cov_120_254756_g5228_i0;Nebulomonas_marisrubri|TRINITY_DN7350_c0_g1_TRINITY_DN7350_c0_g1_i1_g_19971_m_19971;Nibbleromonas_arcticus|TRINITY_DN2…
cluster2183	GO:0008270; F:zinc ion binding; IEA:InterPro	13	B9RAJ0	Ancoracysta_twista|GFYU01022695_1_p1;Hemimastix_kukwesjijk|EP00696_Hemimastix_kukwesjijk_P011557;Meteora_sporadica|NODE_1913_length_2855_cov_90_804223_g1560_i0;Nebulomonas_marisrubri|TRINITY_DN4852_c0_g1_TRINITY_DN4852_c0_g1_i1_g_31108_m_31108;Nebulomonas_marisrubri|TRINITY_DN905_c0_g1_TRINITY_DN905_c0_g1_i1_g_42321_m_42321;Nibbleromonas_arcticus|TRINITY_DN5338_c0_g1_TRINITY_DN5338_c0_g1_i1_g_430…
cluster2185	GO:0006457; P:protein folding; IBA:GO_Central	13	A8Y197	Ancoracysta_twista|GFYU01022997_1_p1;Hemimastix_kukwesjijk|EP00696_Hemimastix_kukwesjijk_P006432;Hemimastix_kukwesjijk|EP00696_Hemimastix_kukwesjijk_P006434;Meteora_sporadica|NODE_11743_length_482_cov_123_026128_g9986_i0;Nebulomonas_marisrubri|TRINITY_DN5733_c0_g1_TRINITY_DN5733_c0_g1_i1_g_16115_m_16115;Nibbleromonas_arcticus|TRINITY_DN23423_c0_g1_TRINITY_DN23423_c0_g1_i1_g_42570_m_42570;Nibblero…
cluster2199	N/A	13	N/A	Ancoracysta_twista|GFYU01028577_1_p1;Ancoracysta_twista|GFYU01033561_1_p1;Hemimastix_kukwesjijk|EP00696_Hemimastix_kukwesjijk_P015225;Meteora_sporadica|NODE_8107_length_966_cov_68_044199_g6675_i0;Meteora_sporadica|NODE_8778_length_855_cov_85_915617_g6675_i1;Nebulomonas_marisrubri|TRINITY_DN34218_c0_g1_TRINITY_DN34218_c0_g1_i1_g_41233_m_41233;Nibbleromonas_arcticus|TRINITY_DN342_c0_g1_TRINITY_DN34…
cluster2200	GO:0010054; P:trichoblast differentiation; IMP:TAIR	13	Q8W1X2	Ancoracysta_twista|GFYU01029189_1_p1;Ancoracysta_twista|GFYU01056313_1_p1;Hemimastix_kukwesjijk|EP00696_Hemimastix_kukwesjijk_P012266;Meteora_sporadica|NODE_7612_length_1047_cov_37_784990_g6256_i0;Meteora_sporadica|NODE_9986_length_690_cov_28_562798_g6256_i1;Nebulomonas_marisrubri|TRINITY_DN10797_c0_g1_TRINITY_DN10797_c0_g1_i1_g_41457_m_41457;Nibbleromonas_arcticus|TRINITY_DN10626_c0_g1_TRINITY_D…
cluster2204	GO:0080182; P:(obsolete) histone H3-K4 trimethylation; IBA:GO_Central	13	Q6UXN9	Ancoracysta_twista|GFYU01030951_1_p1;Hemimastix_kukwesjijk|EP00696_Hemimastix_kukwesjijk_P000794;Meteora_sporadica|NODE_8025_length_979_cov_28_874728_g6605_i0;Nebulomonas_marisrubri|TRINITY_DN8734_c0_g1_TRINITY_DN8734_c0_g1_i1_g_31315_m_31315;Nebulomonas_marisrubri|TRINITY_DN8734_c0_g1_TRINITY_DN8734_c0_g1_i2_g_31317_m_31317;Nibbleromonas_arcticus|TRINITY_DN8424_c0_g1_TRINITY_DN8424_c0_g1_i1_g_64…
cluster2205	GO:0002188; P:translation reinitiation; IBA:GO_Central	13	Q7ZV34	Ancoracysta_twista|GFYU01031010_1_p1;Hemimastix_kukwesjijk|EP00696_Hemimastix_kukwesjijk_P007415;Hemimastix_kukwesjijk|EP00696_Hemimastix_kukwesjijk_P009546;Meteora_sporadica|NODE_6121_length_1315_cov_31_779904_g5005_i0;Nebulomonas_marisrubri|TRINITY_DN13195_c0_g1_TRINITY_DN13195_c0_g1_i1_g_67848_m_67848;Nibbleromonas_arcticus|TRINITY_DN8630_c0_g1_TRINITY_DN8630_c0_g1_i1_g_944_m_944;Nibbleromonas…
cluster2234	GO:0008270; F:zinc ion binding; IEA:InterPro	13	Q5EB97	Ancoracysta_twista|GFYU01050850_1_p1;Hemimastix_kukwesjijk|EP00696_Hemimastix_kukwesjijk_P007167;Meteora_sporadica|NODE_9529_length_745_cov_30_513158_g7925_i0;Nebulomonas_marisrubri|TRINITY_DN10391_c0_g1_TRINITY_DN10391_c0_g1_i1_g_91951_m_91951;Nibbleromonas_arcticus|TRINITY_DN5665_c0_g1_TRINITY_DN5665_c0_g1_i1_g_19537_m_19537;Nibbleromonas_curacaus|TRINITY_DN47309_c0_g1_TRINITY_DN47309_c0_g1_i1_…
cluster2251	GO:0006610; P:ribosomal protein import into nucleus; ISO:MGI	13	Q8BKC5	Ancoracysta_twista|GFYU01070307_1_p1;Ancoracysta_twista|GFYU01084483_1_p2;Hemimastix_kukwesjijk|EP00696_Hemimastix_kukwesjijk_P019154;Meteora_sporadica|NODE_1409_length_3273_cov_7_812267_g1152_i0;Nebulomonas_marisrubri|TRINITY_DN13134_c0_g1_TRINITY_DN13134_c0_g1_i1_g_67333_m_67333;Nibbleromonas_arcticus|TRINITY_DN26214_c0_g1_TRINITY_DN26214_c0_g1_i1_g_45927_m_45927;Nibbleromonas_curacaus|TRINITY_…
cluster2328	GO:0016082; P:synaptic vesicle priming; IEA:Ensembl	12	P54921	Ancoracysta_twista|GFYU01000214_1_p1;Hemimastix_kukwesjijk|EP00696_Hemimastix_kukwesjijk_P006781;Hemimastix_kukwesjijk|EP00696_Hemimastix_kukwesjijk_P014760;Meteora_sporadica|NODE_7623_length_1045_cov_138_796748_g6266_i0;Nebulomonas_marisrubri|TRINITY_DN2131_c0_g1_TRINITY_DN2131_c0_g1_i1_g_31769_m_31769;Nibbleromonas_arcticus|TRINITY_DN10446_c0_g1_TRINITY_DN10446_c0_g1_i1_g_26066_m_26066;Nibblero…
cluster2333	GO:0006508; P:proteolysis; IDA:dictyBase	12	Q55GJ6	Ancoracysta_twista|GFYU01000291_1_p1;Hemimastix_kukwesjijk|EP00696_Hemimastix_kukwesjijk_P010177;Meteora_sporadica|NODE_9513_length_747_cov_237_374636_g7911_i0;Nebulomonas_marisrubri|TRINITY_DN7005_c0_g1_TRINITY_DN7005_c0_g1_i1_g_33027_m_33027;Nebulomonas_marisrubri|TRINITY_DN7005_c0_g1_TRINITY_DN7005_c0_g1_i2_g_33029_m_33029;Nibbleromonas_arcticus|TRINITY_DN3167_c0_g1_TRINITY_DN3167_c0_g1_i1_g_6…
cluster2334	GO:0006511; P:ubiquitin-dependent protein catabolic process; ISS:UniProtKB	12	Q9ES54	Ancoracysta_twista|GFYU01000293_1_p1;Hemimastix_kukwesjijk|EP00696_Hemimastix_kukwesjijk_P017229;Meteora_sporadica|NODE_5902_length_1359_cov_24_510786_g4818_i0;Nebulomonas_marisrubri|TRINITY_DN2849_c0_g1_TRINITY_DN2849_c0_g1_i1_g_68762_m_68762;Nibbleromonas_arcticus|TRINITY_DN8926_c0_g1_TRINITY_DN8926_c0_g1_i1_g_43732_m_43732;Nibbleromonas_curacaus|TRINITY_DN37547_c0_g1_TRINITY_DN37547_c0_g1_i1_g…
cluster2336	GO:0006457; P:protein folding; IEA:InterPro	12	Q9SLY8	Ancoracysta_twista|GFYU01000363_1_p2;Hemimastix_kukwesjijk|EP00696_Hemimastix_kukwesjijk_P017325;Meteora_sporadica|NODE_5610_length_1417_cov_265_462389_g4561_i0;Nebulomonas_marisrubri|TRINITY_DN24838_c0_g1_TRINITY_DN24838_c0_g1_i1_g_68646_m_68646;Nebulomonas_marisrubri|TRINITY_DN5368_c0_g1_TRINITY_DN5368_c0_g1_i1_g_72714_m_72714;Nibbleromonas_arcticus|TRINITY_DN3767_c0_g1_TRINITY_DN3767_c0_g1_i1_…
cluster2339	GO:0006906; P:vesicle fusion; IEA:EnsemblFungi	12	Q757A4	Ancoracysta_twista|GFYU01000407_1_p2;Hemimastix_kukwesjijk|EP00696_Hemimastix_kukwesjijk_P005612;Meteora_sporadica|NODE_8842_length_844_cov_56_943806_g7313_i0;Meteora_sporadica|NODE_9550_length_743_cov_71_711144_g7313_i1;Nebulomonas_marisrubri|TRINITY_DN8315_c0_g1_TRINITY_DN8315_c0_g1_i2_g_60326_m_60326;Nibbleromonas_arcticus|TRINITY_DN4688_c0_g1_TRINITY_DN4688_c0_g1_i1_g_31777_m_31777;Nibbleromo…
cluster2341	GO:0006412; P:translation; IEA:InterPro	12	P46293	Ancoracysta_twista|GFYU01000434_1_p1;Hemimastix_kukwesjijk|EP00696_Hemimastix_kukwesjijk_P004142;Meteora_sporadica|NODE_10827_length_582_cov_3175_328215_g9107_i0;Nebulomonas_marisrubri|TRINITY_DN40475_c0_g1_TRINITY_DN40475_c0_g1_i1_g_37527_m_37527;Nebulomonas_marisrubri|TRINITY_DN6742_c0_g1_TRINITY_DN6742_c0_g1_i1_g_77149_m_77149;Nibbleromonas_arcticus|TRINITY_DN3114_c0_g1_TRINITY_DN3114_c0_g1_i1…
cluster2344	GO:0000054; P:ribosomal subunit export from nucleus; IBA:GO_Central	12	P56537	Ancoracysta_twista|GFYU01000474_1_p1;Hemimastix_kukwesjijk|EP00696_Hemimastix_kukwesjijk_P013970;Meteora_sporadica|NODE_8593_length_884_cov_12_075334_g7100_i0;Nebulomonas_marisrubri|TRINITY_DN15166_c0_g1_TRINITY_DN15166_c0_g1_i1_g_73676_m_73676;Nibbleromonas_arcticus|TRINITY_DN10258_c0_g1_TRINITY_DN10258_c0_g1_i1_g_10153_m_10153;Nibbleromonas_curacaus|TRINITY_DN8371_c0_g1_TRINITY_DN8371_c0_g1_i1_…
cluster2345	GO:0006412; P:translation; IEA:InterPro	12	Q3ZBH8	Ancoracysta_twista|GFYU01000486_1_p1;Hemimastix_kukwesjijk|EP00696_Hemimastix_kukwesjijk_P015482;Meteora_sporadica|NODE_6791_length_1191_cov_984_451327_g5571_i0;Nebulomonas_marisrubri|TRINITY_DN1870_c0_g1_TRINITY_DN1870_c0_g1_i1_g_18884_m_18884;Nibbleromonas_arcticus|TRINITY_DN3494_c0_g1_TRINITY_DN3494_c0_g1_i1_g_34289_m_34289;Nibbleromonas_curacaus|TRINITY_DN4983_c0_g1_TRINITY_DN4983_c0_g1_i1_g_…
cluster2346	GO:0046686; P:response to cadmium ion; IEP:TAIR	12	O81148	Ancoracysta_twista|GFYU01000540_1_p1;Hemimastix_kukwesjijk|EP00696_Hemimastix_kukwesjijk_P010515;Hemimastix_kukwesjijk|EP00696_Hemimastix_kukwesjijk_P010516;Meteora_sporadica|NODE_9409_length_762_cov_93_756063_g7818_i0;Nebulomonas_marisrubri|TRINITY_DN37564_c0_g1_TRINITY_DN37564_c0_g1_i1_g_65164_m_65164;Nibbleromonas_arcticus|TRINITY_DN4396_c0_g1_TRINITY_DN4396_c0_g1_i1_g_35387_m_35387;Nibbleromo…
cluster2348	GO:0043161; P:proteasome-mediated ubiquitin-dependent protein catabolic process; IBA:GO_Central	12	Q9LSU1	Ancoracysta_twista|GFYU01000601_1_p1;Hemimastix_kukwesjijk|EP00696_Hemimastix_kukwesjijk_P009702;Meteora_sporadica|NODE_8771_length_856_cov_95_968553_g7251_i0;Nebulomonas_marisrubri|TRINITY_DN2454_c0_g1_TRINITY_DN2454_c0_g1_i1_g_14515_m_14515;Nibbleromonas_arcticus|TRINITY_DN1674_c0_g1_TRINITY_DN1674_c0_g1_i1_g_28589_m_28589;Nibbleromonas_curacaus|TRINITY_DN9764_c0_g1_TRINITY_DN9764_c0_g1_i1_g_12…
cluster2350	GO:0006457; P:protein folding; IEA:InterPro	12	Q54CL2	Ancoracysta_twista|GFYU01000629_1_p1;Hemimastix_kukwesjijk|EP00696_Hemimastix_kukwesjijk_P012474;Meteora_sporadica|NODE_3977_length_1840_cov_66_266442_g3229_i0;Nebulomonas_marisrubri|TRINITY_DN8580_c0_g1_TRINITY_DN8580_c0_g1_i1_g_52814_m_52814;Nebulomonas_marisrubri|TRINITY_DN8580_c0_g1_TRINITY_DN8580_c0_g1_i3_g_52817_m_52817;Nibbleromonas_arcticus|TRINITY_DN943_c0_g1_TRINITY_DN943_c0_g1_i1_g_266…
cluster2351	GO:0006412; P:translation; IEA:InterPro	12	Q9FJA6	Ancoracysta_twista|GFYU01000665_1_p1;Ancoracysta_twista|GFYU01040994_1_p1;Hemimastix_kukwesjijk|EP00696_Hemimastix_kukwesjijk_P013174;Meteora_sporadica|NODE_5755_length_1384_cov_1306_988662_g4691_i0;Nebulomonas_marisrubri|TRINITY_DN11467_c1_g1_TRINITY_DN11467_c1_g1_i2_g_26284_m_26284;Nibbleromonas_arcticus|TRINITY_DN2260_c0_g1_TRINITY_DN2260_c0_g1_i1_g_9577_m_9577;Nibbleromonas_curacaus|TRINITY_D…
cluster2354	GO:0006429; P:leucyl-tRNA aminoacylation; IEA:InterPro	12	Q5R614	Ancoracysta_twista|GFYU01000695_1_p1;Hemimastix_kukwesjijk|EP00696_Hemimastix_kukwesjijk_P000590;Hemimastix_kukwesjijk|EP00696_Hemimastix_kukwesjijk_P013926;Meteora_sporadica|NODE_1371_length_3316_cov_32_695238_g1119_i0;Nebulomonas_marisrubri|TRINITY_DN11889_c0_g1_TRINITY_DN11889_c0_g1_i1_g_38598_m_38598;Nibbleromonas_arcticus|TRINITY_DN19867_c0_g1_TRINITY_DN19867_c0_g1_i1_g_50466_m_50466;Nibbler…
cluster2356	GO:0015031; P:protein transport; IEA:UniProtKB-KW	12	Q91XB7	Ancoracysta_twista|GFYU01000778_1_p1;Hemimastix_kukwesjijk|EP00696_Hemimastix_kukwesjijk_P011071;Meteora_sporadica|NODE_7311_length_1098_cov_81_102218_g6001_i0;Nebulomonas_marisrubri|TRINITY_DN1086_c0_g1_TRINITY_DN1086_c0_g1_i1_g_54951_m_54951;Nibbleromonas_arcticus|TRINITY_DN3894_c0_g1_TRINITY_DN3894_c0_g1_i1_g_38284_m_38284;Nibbleromonas_curacaus|TRINITY_DN24109_c0_g1_TRINITY_DN24109_c0_g1_i1_g…
cluster2364	GO:0010043; P:response to zinc ion; IEP:TAIR	12	P48491	Ancoracysta_twista|GFYU01000937_1_p1;Ancoracysta_twista|GFYU01051166_1_p1;Hemimastix_kukwesjijk|EP00696_Hemimastix_kukwesjijk_P018181;Meteora_sporadica|NODE_8971_length_821_cov_82_039474_g7423_i0;Nebulomonas_marisrubri|TRINITY_DN37980_c0_g1_TRINITY_DN37980_c0_g1_i1_g_58187_m_58187;Nibbleromonas_arcticus|TRINITY_DN3048_c0_g1_TRINITY_DN3048_c0_g1_i1_g_39142_m_39142;Nibbleromonas_curacaus|TRINITY_DN…
cluster2365	GO:0006508; P:proteolysis; IDA:dictyBase	12	Q556Q0	Ancoracysta_twista|GFYU01000980_1_p1;Hemimastix_kukwesjijk|EP00696_Hemimastix_kukwesjijk_P015212;Meteora_sporadica|NODE_8870_length_839_cov_145_394602_g7337_i0;Nebulomonas_marisrubri|TRINITY_DN9041_c0_g1_TRINITY_DN9041_c0_g1_i1_g_43054_m_43054;Nibbleromonas_arcticus|TRINITY_DN25127_c0_g1_TRINITY_DN25127_c0_g1_i1_g_32370_m_32370;Nibbleromonas_curacaus|TRINITY_DN3130_c0_g1_TRINITY_DN3130_c0_g1_i1_g…
cluster2366	GO:0000920; P:septum digestion after cytokinesis; IBA:GO_Central	12	Q6DFS6	Ancoracysta_twista|GFYU01001024_1_p1;Hemimastix_kukwesjijk|EP00696_Hemimastix_kukwesjijk_P015669;Meteora_sporadica|NODE_9290_length_777_cov_99_761173_g7710_i0;Nebulomonas_marisrubri|TRINITY_DN27884_c0_g1_TRINITY_DN27884_c0_g1_i1_g_84021_m_84021;Nibbleromonas_arcticus|TRINITY_DN2691_c0_g1_TRINITY_DN2691_c0_g1_i1_g_45660_m_45660;Nibbleromonas_curacaus|TRINITY_DN7841_c0_g1_TRINITY_DN7841_c0_g1_i1_g_…
cluster2367	GO:0006508; P:proteolysis; IDA:dictyBase	12	Q55D66	Ancoracysta_twista|GFYU01001026_1_p1;Hemimastix_kukwesjijk|EP00696_Hemimastix_kukwesjijk_P006777;Meteora_sporadica|NODE_9573_length_739_cov_89_495575_g7960_i0;Nebulomonas_marisrubri|TRINITY_DN6120_c0_g1_TRINITY_DN6120_c0_g1_i1_g_49476_m_49476;Nibbleromonas_arcticus|TRINITY_DN24595_c0_g1_TRINITY_DN24595_c0_g1_i1_g_52626_m_52626;Nibbleromonas_curacaus|TRINITY_DN6832_c0_g1_TRINITY_DN6832_c0_g1_i2_g_…
cluster2368	GO:0006412; P:translation; IEA:InterPro	12	B8B9K6	Ancoracysta_twista|GFYU01001042_1_p1;Hemimastix_kukwesjijk|EP00696_Hemimastix_kukwesjijk_P012315;Meteora_sporadica|NODE_6232_length_1296_cov_2705_480972_g5101_i0;Meteora_sporadica|NODE_8588_length_885_cov_4066_069175_g5101_i1;Nebulomonas_marisrubri|TRINITY_DN10973_c0_g1_TRINITY_DN10973_c0_g1_i1_g_36157_m_36157;Nibbleromonas_arcticus|TRINITY_DN330_c0_g1_TRINITY_DN330_c0_g1_i1_g_11513_m_11513;Nibbl…
cluster2369	GO:0006412; P:translation; IEA:InterPro	12	Q90YW0	Ancoracysta_twista|GFYU01001050_1_p2;Hemimastix_kukwesjijk|EP00696_Hemimastix_kukwesjijk_P004801;Meteora_sporadica|NODE_5807_length_1373_cov_1694_978659_g4735_i0;Nebulomonas_marisrubri|TRINITY_DN23245_c0_g1_TRINITY_DN23245_c0_g1_i1_g_60738_m_60738;Nebulomonas_marisrubri|TRINITY_DN7364_c0_g1_TRINITY_DN7364_c0_g1_i2_g_19849_m_19849;Nibbleromonas_arcticus|TRINITY_DN3562_c0_g1_TRINITY_DN3562_c0_g1_i1…
cluster2370	GO:0043161; P:proteasome-mediated ubiquitin-dependent protein catabolic process; IBA:GO_Central	12	Q9LSU0	Ancoracysta_twista|GFYU01001060_1_p1;Hemimastix_kukwesjijk|EP00696_Hemimastix_kukwesjijk_P014016;Hemimastix_kukwesjijk|EP00696_Hemimastix_kukwesjijk_P014017;Meteora_sporadica|NODE_8997_length_817_cov_247_906085_g7447_i0;Nebulomonas_marisrubri|TRINITY_DN3097_c0_g1_TRINITY_DN3097_c0_g1_i1_g_68294_m_68294;Nibbleromonas_arcticus|TRINITY_DN3246_c0_g1_TRINITY_DN3246_c0_g1_i1_g_51668_m_51668;Nibbleromon…
cluster2371	GO:0006281; P:DNA repair; IEA:UniProtKB-KW	12	Q9DE26	Ancoracysta_twista|GFYU01001095_1_p1;Hemimastix_kukwesjijk|EP00696_Hemimastix_kukwesjijk_P014042;Meteora_sporadica|NODE_4617_length_1651_cov_13_605660_g3740_i0;Nebulomonas_marisrubri|TRINITY_DN10940_c0_g1_TRINITY_DN10940_c0_g1_i1_g_36365_m_36365;Nebulomonas_marisrubri|TRINITY_DN10940_c0_g1_TRINITY_DN10940_c0_g1_i2_g_36366_m_36366;Nibbleromonas_arcticus|TRINITY_DN9512_c0_g1_TRINITY_DN9512_c0_g1_i1…
cluster2372	GO:0003899; F:DNA-directed RNA polymerase activity; IEA:InterPro	12	Q38859	Ancoracysta_twista|GFYU01001119_1_p1;Hemimastix_kukwesjijk|EP00696_Hemimastix_kukwesjijk_P003957;Meteora_sporadica|NODE_12389_length_421_cov_87_152778_g10626_i0;Nebulomonas_marisrubri|TRINITY_DN396_c0_g1_TRINITY_DN396_c0_g1_i1_g_32232_m_32232;Nibbleromonas_arcticus|TRINITY_DN15410_c0_g1_TRINITY_DN15410_c0_g1_i1_g_53347_m_53347;Nibbleromonas_curacaus|TRINITY_DN17978_c0_g1_TRINITY_DN17978_c0_g1_i1_…
cluster2375	GO:0016024; P:CDP-diacylglycerol biosynthetic process; IEA:UniProtKB-UniPathway	12	O49639	Ancoracysta_twista|GFYU01001174_1_p1;Hemimastix_kukwesjijk|EP00696_Hemimastix_kukwesjijk_P010585;Meteora_sporadica|NODE_5331_length_1477_cov_13_685028_g4329_i0;Nebulomonas_marisrubri|TRINITY_DN13482_c1_g5_TRINITY_DN13482_c1_g5_i1_g_81405_m_81405;Nibbleromonas_arcticus|TRINITY_DN3356_c0_g1_TRINITY_DN3356_c0_g1_i1_g_54214_m_54214;Nibbleromonas_curacaus|TRINITY_DN6326_c0_g1_TRINITY_DN6326_c0_g1_i1_g…
cluster2377	GO:0016192; P:vesicle-mediated transport; IEA:InterPro	12	Q54HS9	Ancoracysta_twista|GFYU01001227_1_p1;Hemimastix_kukwesjijk|EP00696_Hemimastix_kukwesjijk_P011061;Meteora_sporadica|NODE_6081_length_1322_cov_64_234734_g4970_i0;Nebulomonas_marisrubri|TRINITY_DN7245_c0_g1_TRINITY_DN7245_c0_g1_i2_g_48007_m_48007;Nibbleromonas_arcticus|TRINITY_DN3465_c0_g1_TRINITY_DN3465_c0_g1_i1_g_34231_m_34231;Nibbleromonas_curacaus|TRINITY_DN23600_c0_g1_TRINITY_DN23600_c0_g1_i1_g…
cluster2378	GO:0002181; P:cytoplasmic translation; IBA:GO_Central	12	Q3T025	Ancoracysta_twista|GFYU01001237_1_p1;Hemimastix_kukwesjijk|EP00696_Hemimastix_kukwesjijk_P008602;Meteora_sporadica|NODE_10290_length_650_cov_3158_475382_g8607_i0;Nebulomonas_marisrubri|TRINITY_DN3115_c0_g1_TRINITY_DN3115_c0_g1_i2_g_83904_m_83904;Nibbleromonas_arcticus|TRINITY_DN2532_c0_g1_TRINITY_DN2532_c0_g1_i1_g_31287_m_31287;Nibbleromonas_curacaus|TRINITY_DN12122_c0_g1_TRINITY_DN12122_c0_g1_i1…
cluster2381	GO:0051726; P:regulation of cell cycle; IEA:Ensembl	12	Q8TBC4	Ancoracysta_twista|GFYU01001329_1_p1;Hemimastix_kukwesjijk|EP00696_Hemimastix_kukwesjijk_P012901;Meteora_sporadica|NODE_6026_length_1333_cov_38_782233_g4922_i0;Nebulomonas_marisrubri|TRINITY_DN10753_c0_g1_TRINITY_DN10753_c0_g1_i1_g_41619_m_41619;Nebulomonas_marisrubri|TRINITY_DN10753_c0_g1_TRINITY_DN10753_c0_g1_i2_g_41624_m_41624;Nibbleromonas_arcticus|TRINITY_DN4876_c0_g1_TRINITY_DN4876_c0_g1_i1…
cluster2382	GO:0006614; P:SRP-dependent cotranslational protein targeting to membrane; ISO:MGI	12	P14576	Ancoracysta_twista|GFYU01001334_1_p1;Hemimastix_kukwesjijk|EP00696_Hemimastix_kukwesjijk_P012875;Meteora_sporadica|NODE_4526_length_1675_cov_242_813507_g3666_i0;Nebulomonas_marisrubri|TRINITY_DN9421_c0_g1_TRINITY_DN9421_c0_g1_i1_g_64149_m_64149;Nibbleromonas_arcticus|TRINITY_DN3646_c0_g1_TRINITY_DN3646_c0_g1_i1_g_14440_m_14440;Nibbleromonas_curacaus|TRINITY_DN5219_c0_g1_TRINITY_DN5219_c0_g1_i1_g_…
cluster2383	GO:0006281; P:DNA repair; IEA:UniProtKB-KW	12	Q9DE27	Ancoracysta_twista|GFYU01001350_1_p1;Hemimastix_kukwesjijk|EP00696_Hemimastix_kukwesjijk_P012476;Meteora_sporadica|NODE_5625_length_1414_cov_60_691057_g4574_i0;Nebulomonas_marisrubri|TRINITY_DN12409_c0_g1_TRINITY_DN12409_c0_g1_i1_g_37014_m_37014;Nibbleromonas_arcticus|TRINITY_DN9279_c0_g1_TRINITY_DN9279_c0_g1_i1_g_21397_m_21397;Nibbleromonas_curacaus|TRINITY_DN9973_c0_g1_TRINITY_DN9973_c0_g1_i1_g…
cluster2384	GO:0015991; P:ATP hydrolysis coupled proton transport; IEA:InterPro	12	A2ZBW5	Ancoracysta_twista|GFYU01001389_1_p2;Hemimastix_kukwesjijk|EP00696_Hemimastix_kukwesjijk_P008993;Meteora_sporadica|NODE_10231_length_658_cov_373_298157_g8271_i1;Meteora_sporadica|NODE_9916_length_699_cov_281_670846_g8271_i0;Nebulomonas_marisrubri|TRINITY_DN6157_c0_g1_TRINITY_DN6157_c0_g1_i1_g_49441_m_49441;Nibbleromonas_arcticus|TRINITY_DN1753_c0_g1_TRINITY_DN1753_c0_g1_i1_g_44651_m_44651;Nibbler…
cluster2386	GO:0006508; P:proteolysis; IDA:dictyBase	12	P34120	Ancoracysta_twista|GFYU01001454_1_p1;Hemimastix_kukwesjijk|EP00696_Hemimastix_kukwesjijk_P004855;Hemimastix_kukwesjijk|EP00696_Hemimastix_kukwesjijk_P004859;Meteora_sporadica|NODE_8899_length_834_cov_132_670116_g7364_i0;Nebulomonas_marisrubri|TRINITY_DN36741_c0_g1_TRINITY_DN36741_c0_g1_i1_g_93749_m_93749;Nibbleromonas_arcticus|TRINITY_DN3101_c0_g1_TRINITY_DN3101_c0_g1_i1_g_6857_m_6857;Nibbleromon…
cluster2387	GO:0045116; P:protein neddylation; IBA:GO_Central	12	Q9ZU75	Ancoracysta_twista|GFYU01001646_1_p1;Hemimastix_kukwesjijk|EP00696_Hemimastix_kukwesjijk_P006197;Meteora_sporadica|NODE_9659_length_730_cov_82_875934_g8037_i0;Nebulomonas_marisrubri|TRINITY_DN23192_c0_g1_TRINITY_DN23192_c0_g1_i1_g_3870_m_3870;Nibbleromonas_arcticus|TRINITY_DN12531_c0_g1_TRINITY_DN12531_c0_g1_i1_g_5551_m_5551;Nibbleromonas_curacaus|TRINITY_DN13096_c0_g1_TRINITY_DN13096_c0_g1_i1_g_…
cluster2395	GO:0002183; P:cytoplasmic translational initiation; ISO:PomBase	12	Q10251	Ancoracysta_twista|GFYU01001756_1_p1;Ancoracysta_twista|GFYU01008585_1_p1;Hemimastix_kukwesjijk|EP00696_Hemimastix_kukwesjijk_P018001;Meteora_sporadica|NODE_1202_length_3535_cov_22_029073_g983_i0;Nebulomonas_marisrubri|TRINITY_DN13708_c4_g1_TRINITY_DN13708_c4_g1_i3_g_46193_m_46193;Nibbleromonas_arcticus|TRINITY_DN23312_c0_g1_TRINITY_DN23312_c0_g1_i1_g_46775_m_46775;Nibbleromonas_curacaus|TRINITY_…
cluster2396	GO:0043161; P:proteasome-mediated ubiquitin-dependent protein catabolic process; IBA:GO_Central	12	Q9R1P4	Ancoracysta_twista|GFYU01001764_1_p1;Hemimastix_kukwesjijk|EP00696_Hemimastix_kukwesjijk_P007182;Meteora_sporadica|NODE_8419_length_913_cov_236_103286_g6954_i0;Nebulomonas_marisrubri|TRINITY_DN71_c0_g1_TRINITY_DN71_c0_g1_i1_g_18137_m_18137;Nebulomonas_marisrubri|TRINITY_DN71_c0_g1_TRINITY_DN71_c0_g1_i2_g_18138_m_18138;Nibbleromonas_arcticus|TRINITY_DN9125_c0_g1_TRINITY_DN9125_c0_g1_i1_g_20512_m_2…
cluster2401	GO:0006511; P:ubiquitin-dependent protein catabolic process; IEA:InterPro	12	Q9FPT1	Ancoracysta_twista|GFYU01001946_1_p1;Hemimastix_kukwesjijk|EP00696_Hemimastix_kukwesjijk_P011659;Meteora_sporadica|NODE_1116_length_3645_cov_202_114118_g909_i0;Nebulomonas_marisrubri|TRINITY_DN12719_c0_g1_TRINITY_DN12719_c0_g1_i1_g_62201_m_62201;Nebulomonas_marisrubri|TRINITY_DN32259_c0_g1_TRINITY_DN32259_c0_g1_i1_g_54390_m_54390;Nibbleromonas_arcticus|TRINITY_DN2310_c0_g1_TRINITY_DN2310_c0_g1_i2…
cluster2402	N/A	12	Q9NWV4	Ancoracysta_twista|GFYU01002202_1_p1;Hemimastix_kukwesjijk|EP00696_Hemimastix_kukwesjijk_P011558;Meteora_sporadica|NODE_10181_length_664_cov_71_577114_g8510_i0;Nebulomonas_marisrubri|TRINITY_DN20348_c0_g1_TRINITY_DN20348_c0_g1_i1_g_53810_m_53810;Nibbleromonas_arcticus|TRINITY_DN17086_c0_g1_TRINITY_DN17086_c0_g1_i1_g_34896_m_34896;Nibbleromonas_curacaus|TRINITY_DN2766_c0_g1_TRINITY_DN2766_c0_g1_i1…
cluster2416	GO:0006457; P:protein folding; ISS:dictyBase	12	Q552J0	Ancoracysta_twista|GFYU01002639_1_p1;Hemimastix_kukwesjijk|EP00696_Hemimastix_kukwesjijk_P000231;Meteora_sporadica|NODE_3619_length_1973_cov_160_414226_g2929_i0;Nebulomonas_marisrubri|TRINITY_DN8709_c0_g1_TRINITY_DN8709_c0_g1_i1_g_31163_m_31163;Nibbleromonas_arcticus|TRINITY_DN15540_c0_g1_TRINITY_DN15540_c0_g1_i1_g_49318_m_49318;Nibbleromonas_curacaus|TRINITY_DN618_c0_g1_TRINITY_DN618_c0_g1_i1_g_…
cluster2420	GO:0034314; P:Arp2/3 complex-mediated actin nucleation; IEA:InterPro	12	Q641G7	Ancoracysta_twista|GFYU01002762_1_p1;Hemimastix_kukwesjijk|EP00696_Hemimastix_kukwesjijk_P008856;Hemimastix_kukwesjijk|EP00696_Hemimastix_kukwesjijk_P008858;Meteora_sporadica|NODE_10749_length_592_cov_217_651601_g9035_i0;Nebulomonas_marisrubri|TRINITY_DN10004_c0_g1_TRINITY_DN10004_c0_g1_i1_g_80777_m_80777;Nibbleromonas_arcticus|TRINITY_DN5192_c0_g1_TRINITY_DN5192_c0_g1_i1_g_51206_m_51206;Nibblero…
cluster2426	GO:0006099; P:tricarboxylic acid cycle; IBA:GO_Central	12	P36967	Ancoracysta_twista|GFYU01003094_1_p2;Hemimastix_kukwesjijk|EP00696_Hemimastix_kukwesjijk_P020358;Meteora_sporadica|NODE_1791_length_2940_cov_23_120528_g1463_i0;Nebulomonas_marisrubri|TRINITY_DN72_c0_g1_TRINITY_DN72_c0_g1_i2_g_18085_m_18085;Nibbleromonas_arcticus|TRINITY_DN2381_c0_g1_TRINITY_DN2381_c0_g1_i1_g_34751_m_34751;Nibbleromonas_curacaus|TRINITY_DN3832_c0_g1_TRINITY_DN3832_c0_g1_i1_g_60438…
cluster2428	GO:0042273; P:ribosomal large subunit biogenesis; ISS:UniProtKB	12	Q9JJ80	Ancoracysta_twista|GFYU01003142_1_p1;Hemimastix_kukwesjijk|EP00696_Hemimastix_kukwesjijk_P011469;Meteora_sporadica|NODE_8254_length_940_cov_2_664391_g6806_i0;Nebulomonas_marisrubri|TRINITY_DN21881_c0_g1_TRINITY_DN21881_c0_g1_i1_g_60878_m_60878;Nibbleromonas_arcticus|TRINITY_DN5339_c0_g1_TRINITY_DN5339_c0_g1_i1_g_43244_m_43244;Nibbleromonas_curacaus|TRINITY_DN1691_c0_g1_TRINITY_DN1691_c0_g1_i1_g_5…
cluster2429	GO:0006122; P:mitochondrial electron transport, ubiquinol to cytochrome c; IBA:GO_Central	12	Q42290	Ancoracysta_twista|GFYU01003223_1_p1;Hemimastix_kukwesjijk|EP00696_Hemimastix_kukwesjijk_P012034;Meteora_sporadica|NODE_4821_length_1600_cov_45_575699_g3905_i0;Nebulomonas_marisrubri|TRINITY_DN13275_c0_g1_TRINITY_DN13275_c0_g1_i1_g_8643_m_8643;Nebulomonas_marisrubri|TRINITY_DN13275_c0_g1_TRINITY_DN13275_c0_g1_i3_g_8647_m_8647;Nibbleromonas_arcticus|TRINITY_DN754_c0_g1_TRINITY_DN754_c0_g1_i1_g_300…
cluster2431	GO:0006383; P:transcription by RNA polymerase III; ISS:dictyBase	12	Q54SN4	Ancoracysta_twista|GFYU01003263_1_p1;Hemimastix_kukwesjijk|EP00696_Hemimastix_kukwesjijk_P009685;Meteora_sporadica|NODE_7142_length_1128_cov_9_108716_g5864_i0;Nebulomonas_marisrubri|TRINITY_DN7793_c0_g1_TRINITY_DN7793_c0_g1_i1_g_78518_m_78518;Nibbleromonas_arcticus|TRINITY_DN9524_c0_g1_TRINITY_DN9524_c0_g1_i1_g_19779_m_19779;Nibbleromonas_curacaus|TRINITY_DN983_c0_g1_TRINITY_DN983_c0_g1_i1_g_4744…
cluster2435	GO:0006457; P:protein folding; IEA:InterPro	12	P28769	Ancoracysta_twista|GFYU01003431_1_p1;Hemimastix_kukwesjijk|EP00696_Hemimastix_kukwesjijk_P009228;Meteora_sporadica|NODE_4138_length_1789_cov_159_773727_g3358_i0;Nebulomonas_marisrubri|TRINITY_DN5060_c0_g1_TRINITY_DN5060_c0_g1_i1_g_65759_m_65759;Nibbleromonas_arcticus|TRINITY_DN24011_c0_g1_TRINITY_DN24011_c0_g1_i1_g_52192_m_52192;Nibbleromonas_curacaus|TRINITY_DN10527_c0_g1_TRINITY_DN10527_c0_g1_i…
cluster2440	GO:0071108; P:protein K48-linked deubiquitination; HDA:PomBase	12	Q11119	Ancoracysta_twista|GFYU01003594_1_p1;Hemimastix_kukwesjijk|EP00696_Hemimastix_kukwesjijk_P000558;Meteora_sporadica|NODE_782_length_4218_cov_92_163580_g640_i0;Nebulomonas_marisrubri|TRINITY_DN13496_c0_g1_TRINITY_DN13496_c0_g1_i1_g_82512_m_82512;Nebulomonas_marisrubri|TRINITY_DN13496_c0_g1_TRINITY_DN13496_c0_g1_i2_g_82520_m_82520;Nibbleromonas_arcticus|TRINITY_DN15485_c0_g1_TRINITY_DN15485_c0_g1_i1…
cluster2442	GO:0006508; P:proteolysis; TAS:ProtInc	12	Q8TBN9	Ancoracysta_twista|GFYU01003797_1_p1;Hemimastix_kukwesjijk|EP00696_Hemimastix_kukwesjijk_P002431;Meteora_sporadica|NODE_6982_length_1154_cov_68_870997_g5734_i0;Nebulomonas_marisrubri|TRINITY_DN10353_c0_g1_TRINITY_DN10353_c0_g1_i1_g_91772_m_91772;Nebulomonas_marisrubri|TRINITY_DN10353_c0_g1_TRINITY_DN10353_c0_g1_i3_g_91774_m_91774;Nibbleromonas_arcticus|TRINITY_DN8253_c0_g1_TRINITY_DN8253_c0_g1_i1…
cluster2443	GO:0001732; P:formation of cytoplasmic translation initiation complex; IEA:UniProtKB-UniRule	12	P56821	Ancoracysta_twista|GFYU01003799_1_p1;Hemimastix_kukwesjijk|EP00696_Hemimastix_kukwesjijk_P009968;Meteora_sporadica|NODE_2777_length_2332_cov_28_509467_g2246_i0;Nebulomonas_marisrubri|TRINITY_DN9704_c0_g1_TRINITY_DN9704_c0_g1_i1_g_91361_m_91361;Nibbleromonas_arcticus|TRINITY_DN8749_c0_g1_TRINITY_DN8749_c0_g1_i1_g_42141_m_42141;Nibbleromonas_curacaus|TRINITY_DN16895_c0_g1_TRINITY_DN16895_c0_g1_i1_g…
cluster2448	GO:0030435; P:sporulation resulting in formation of a cellular spore; IMP:dictyBase	12	Q86L04	Ancoracysta_twista|GFYU01004111_1_p1;Hemimastix_kukwesjijk|EP00696_Hemimastix_kukwesjijk_P011371;Meteora_sporadica|NODE_3158_length_2148_cov_8_239099_g2560_i0;Nebulomonas_marisrubri|TRINITY_DN11405_c0_g1_TRINITY_DN11405_c0_g1_i2_g_26660_m_26660;Nibbleromonas_arcticus|TRINITY_DN16835_c0_g1_TRINITY_DN16835_c0_g1_i1_g_51623_m_51623;Nibbleromonas_curacaus|TRINITY_DN6805_c0_g1_TRINITY_DN6805_c0_g1_i1_…
cluster2450	GO:0071340; P:skeletal muscle acetylcholine-gated channel clustering; IEA:Ensembl	12	O15258	Ancoracysta_twista|GFYU01004238_1_p1;Hemimastix_kukwesjijk|EP00696_Hemimastix_kukwesjijk_P006114;Meteora_sporadica|NODE_9798_length_714_cov_52_358346_g8162_i0;Nebulomonas_marisrubri|TRINITY_DN8501_c0_g1_TRINITY_DN8501_c0_g1_i1_g_12969_m_12969;Nibbleromonas_arcticus|TRINITY_DN7088_c0_g1_TRINITY_DN7088_c0_g1_i1_g_32547_m_32547;Nibbleromonas_curacaus|TRINITY_DN24061_c0_g1_TRINITY_DN24061_c0_g1_i1_g_…
cluster2453	GO:0016226; P:iron-sulfur cluster assembly; ISS:UniProtKB	12	Q5EB25	Ancoracysta_twista|GFYU01004323_1_p1;Hemimastix_kukwesjijk|EP00696_Hemimastix_kukwesjijk_P012522;Meteora_sporadica|NODE_6515_length_1249_cov_29_149832_g5341_i0;Nebulomonas_marisrubri|TRINITY_DN9398_c0_g1_TRINITY_DN9398_c0_g1_i2_g_50525_m_50525;Nebulomonas_marisrubri|TRINITY_DN9398_c0_g1_TRINITY_DN9398_c0_g1_i3_g_50528_m_50528;Nibbleromonas_arcticus|TRINITY_DN5574_c0_g1_TRINITY_DN5574_c0_g1_i1_g_1…
cluster2457	GO:0016236; P:macroautophagy; IBA:GO_Central	12	Q5BPL5	Ancoracysta_twista|GFYU01004548_1_p1;Hemimastix_kukwesjijk|EP00696_Hemimastix_kukwesjijk_P017235;Meteora_sporadica|NODE_6870_length_1178_cov_23_826321_g5641_i0;Meteora_sporadica|NODE_7213_length_1114_cov_26_714150_g5641_i1;Nebulomonas_marisrubri|TRINITY_DN8511_c0_g1_TRINITY_DN8511_c0_g1_i1_g_53065_m_53065;Nibbleromonas_arcticus|TRINITY_DN2204_c0_g1_TRINITY_DN2204_c0_g1_i1_g_9625_m_9625;Nibbleromo…
cluster2463	GO:0003743; F:translation initiation factor activity; IEA:UniProtKB-KW	12	O24473	Ancoracysta_twista|GFYU01004754_1_p1;Hemimastix_kukwesjijk|EP00696_Hemimastix_kukwesjijk_P008677;Hemimastix_kukwesjijk|EP00696_Hemimastix_kukwesjijk_P008683;Meteora_sporadica|NODE_6863_length_1179_cov_59_921288_g5634_i0;Nebulomonas_marisrubri|TRINITY_DN13874_c2_g1_TRINITY_DN13874_c2_g1_i2_g_95563_m_95563;Nibbleromonas_arcticus|TRINITY_DN3380_c0_g1_TRINITY_DN3380_c0_g1_i1_g_54204_m_54204;Nibblerom…
cluster2465	GO:0015031; P:protein transport; IEA:UniProtKB-KW	12	P35402	Ancoracysta_twista|GFYU01004872_1_p1;Ancoracysta_twista|GFYU01010857_1_p1;Hemimastix_kukwesjijk|EP00696_Hemimastix_kukwesjijk_P002511;Meteora_sporadica|NODE_7819_length_1012_cov_14_737119_g6439_i0;Nebulomonas_marisrubri|TRINITY_DN6298_c0_g1_TRINITY_DN6298_c0_g1_i1_g_76182_m_76182;Nibbleromonas_arcticus|TRINITY_DN9961_c0_g1_TRINITY_DN9961_c0_g1_i1_g_51001_m_51001;Nibbleromonas_curacaus|TRINITY_DN8…
cluster2470	GO:0046952; P:ketone body catabolic process; IEA:InterPro	12	Q54JD9	Ancoracysta_twista|GFYU01005105_1_p1;Hemimastix_kukwesjijk|EP00696_Hemimastix_kukwesjijk_P018712;Meteora_sporadica|NODE_3548_length_1999_cov_16_667183_g2871_i0;Nebulomonas_marisrubri|TRINITY_DN3447_c0_g1_TRINITY_DN3447_c0_g1_i1_g_83041_m_83041;Nibbleromonas_arcticus|TRINITY_DN18302_c0_g1_TRINITY_DN18302_c0_g1_i1_g_45747_m_45747;Nibbleromonas_arcticus|TRINITY_DN23541_c0_g1_TRINITY_DN23541_c0_g1_i1…
cluster2472	GO:0060213; P:positive regulation of nuclear-transcribed mRNA poly(A) tail shortening; ISS:UniProtKB	12	Q08BM8	Ancoracysta_twista|GFYU01005219_1_p1;Hemimastix_kukwesjijk|EP00696_Hemimastix_kukwesjijk_P017876;Meteora_sporadica|NODE_7632_length_1042_cov_180_232416_g6273_i0;Nebulomonas_marisrubri|TRINITY_DN4591_c0_g1_TRINITY_DN4591_c0_g1_i2_g_52041_m_52041;Nibbleromonas_arcticus|TRINITY_DN87_c0_g1_TRINITY_DN87_c0_g1_i1_g_25285_m_25285;Nibbleromonas_curacaus|TRINITY_DN8191_c0_g1_TRINITY_DN8191_c0_g1_i1_g_1642…
cluster2473	GO:0006465; P:signal peptide processing; IBA:GO_Central	12	Q6ZGL9	Ancoracysta_twista|GFYU01005295_1_p1;Hemimastix_kukwesjijk|EP00696_Hemimastix_kukwesjijk_P017957;Meteora_sporadica|NODE_6651_length_1221_cov_60_851724_g5457_i0;Nebulomonas_marisrubri|TRINITY_DN11839_c0_g1_TRINITY_DN11839_c0_g1_i2_g_38444_m_38444;Nibbleromonas_arcticus|TRINITY_DN16014_c0_g1_TRINITY_DN16014_c0_g1_i1_g_22672_m_22672;Nibbleromonas_curacaus|TRINITY_DN36115_c0_g1_TRINITY_DN36115_c0_g1_…
cluster2474	GO:0001558; P:regulation of cell growth; ISS:UniProtKB	12	Q9V8I2	Ancoracysta_twista|GFYU01005345_1_p1;Hemimastix_kukwesjijk|EP00696_Hemimastix_kukwesjijk_P000995;Meteora_sporadica|NODE_12045_length_453_cov_73_170918_g10284_i0;Nebulomonas_marisrubri|TRINITY_DN9237_c0_g1_TRINITY_DN9237_c0_g1_i3_g_10925_m_10925;Nebulomonas_marisrubri|TRINITY_DN9237_c0_g1_TRINITY_DN9237_c0_g1_i4_g_10929_m_10929;Nibbleromonas_arcticus|TRINITY_DN25657_c0_g1_TRINITY_DN25657_c0_g1_i1_…
cluster2480	GO:0006412; P:translation; IBA:GO_Central	12	Q9LEY9	Ancoracysta_twista|GFYU01005537_1_p1;Hemimastix_kukwesjijk|EP00696_Hemimastix_kukwesjijk_P003351;Hemimastix_kukwesjijk|EP00696_Hemimastix_kukwesjijk_P003355;Meteora_sporadica|NODE_12229_length_436_cov_40_789333_g10468_i0;Nebulomonas_marisrubri|TRINITY_DN9974_c0_g1_TRINITY_DN9974_c0_g1_i1_g_12366_m_12366;Nibbleromonas_arcticus|TRINITY_DN2586_c0_g1_TRINITY_DN2586_c0_g1_i1_g_31007_m_31007;Nibbleromo…
cluster2484	GO:0003723; F:RNA binding; IEA:UniProtKB-KW	12	Q6VEU3	Ancoracysta_twista|GFYU01005825_1_p1;Hemimastix_kukwesjijk|EP00696_Hemimastix_kukwesjijk_P013581;Meteora_sporadica|NODE_9223_length_787_cov_6_827824_g7650_i0;Nebulomonas_marisrubri|TRINITY_DN12808_c0_g1_TRINITY_DN12808_c0_g1_i1_g_6084_m_6084;Nibbleromonas_arcticus|TRINITY_DN19029_c0_g1_TRINITY_DN19029_c0_g1_i1_g_23093_m_23093;Nibbleromonas_curacaus|TRINITY_DN5641_c0_g1_TRINITY_DN5641_c0_g1_i1_g_3…
cluster2497	GO:0009735; P:response to cytokinin; IDA:TAIR	12	Q8L7B5	Ancoracysta_twista|GFYU01006473_1_p1;Hemimastix_kukwesjijk|EP00696_Hemimastix_kukwesjijk_P000370;Hemimastix_kukwesjijk|EP00696_Hemimastix_kukwesjijk_P018220;Meteora_sporadica|NODE_4117_length_1795_cov_47_724337_g3338_i0;Nebulomonas_marisrubri|TRINITY_DN7217_c0_g2_TRINITY_DN7217_c0_g2_i1_g_48081_m_48081;Nibbleromonas_arcticus|TRINITY_DN5170_c0_g1_TRINITY_DN5170_c0_g1_i1_g_51185_m_51185;Nibbleromon…
cluster2498	GO:0017150; F:tRNA dihydrouridine synthase activity; IEA:InterPro	12	Q7ZWS1	Ancoracysta_twista|GFYU01006519_1_p1;Hemimastix_kukwesjijk|EP00696_Hemimastix_kukwesjijk_P011417;Meteora_sporadica|NODE_3833_length_1898_cov_12_135547_g3112_i0;Nebulomonas_marisrubri|TRINITY_DN12106_c1_g1_TRINITY_DN12106_c1_g1_i1_g_17114_m_17114;Nibbleromonas_arcticus|TRINITY_DN9017_c0_g1_TRINITY_DN9017_c0_g1_i1_g_29835_m_29835;Nibbleromonas_curacaus|TRINITY_DN23025_c0_g1_TRINITY_DN23025_c0_g1_i1…
cluster2501	GO:0007042; P:lysosomal lumen acidification; IMP:UniProtKB	12	Q9XW92	Ancoracysta_twista|GFYU01006998_1_p1;Hemimastix_kukwesjijk|EP00696_Hemimastix_kukwesjijk_P002910;Meteora_sporadica|NODE_3718_length_1933_cov_324_771368_g3015_i0;Nebulomonas_marisrubri|TRINITY_DN19399_c0_g1_TRINITY_DN19399_c0_g1_i1_g_13289_m_13289;Nibbleromonas_arcticus|TRINITY_DN8728_c0_g1_TRINITY_DN8728_c0_g1_i1_g_42155_m_42155;Nibbleromonas_curacaus|TRINITY_DN36512_c0_g1_TRINITY_DN36512_c0_g1_i…
cluster2506	GO:0048254; P:snoRNA localization; IMP:UniProtKB	12	Q9Y2X3	Ancoracysta_twista|GFYU01007207_1_p1;Hemimastix_kukwesjijk|EP00696_Hemimastix_kukwesjijk_P017866;Meteora_sporadica|NODE_4528_length_1675_cov_42_355638_g3668_i0;Nebulomonas_marisrubri|TRINITY_DN13874_c3_g1_TRINITY_DN13874_c3_g1_i1_g_95571_m_95571;Nibbleromonas_arcticus|TRINITY_DN230_c0_g1_TRINITY_DN230_c0_g1_i1_g_3083_m_3083;Nibbleromonas_curacaus|TRINITY_DN9886_c1_g1_TRINITY_DN9886_c1_g1_i1_g_903…
cluster2508	GO:0006428; P:isoleucyl-tRNA aminoacylation; IDA:CAFA	12	Q8BU30	Ancoracysta_twista|GFYU01007220_1_p1;Hemimastix_kukwesjijk|EP00696_Hemimastix_kukwesjijk_P000596;Meteora_sporadica|NODE_1229_length_3502_cov_36_600697_g1003_i0;Meteora_sporadica|NODE_7975_length_987_cov_26_722462_g1003_i1;Nebulomonas_marisrubri|TRINITY_DN11617_c0_g1_TRINITY_DN11617_c0_g1_i1_g_44126_m_44126;Nibbleromonas_arcticus|TRINITY_DN1747_c0_g1_TRINITY_DN1747_c0_g1_i1_g_44367_m_44367;Nibbler…
cluster2509	GO:0007035; P:vacuolar acidification; TAS:SGD	12	P23968	Ancoracysta_twista|GFYU01007263_1_p1;Hemimastix_kukwesjijk|EP00696_Hemimastix_kukwesjijk_P018649;Meteora_sporadica|NODE_9325_length_772_cov_98_295359_g7742_i0;Nebulomonas_marisrubri|TRINITY_DN6191_c0_g1_TRINITY_DN6191_c0_g1_i2_g_49354_m_49354;Nebulomonas_marisrubri|TRINITY_DN6191_c0_g1_TRINITY_DN6191_c0_g1_i3_g_49355_m_49355;Nibbleromonas_arcticus|TRINITY_DN15953_c0_g1_TRINITY_DN15953_c0_g1_i1_g_…
cluster2511	GO:0033762; P:response to glucagon; ISO:MGI	12	Q9D0M3	Ancoracysta_twista|GFYU01007363_1_p2;Hemimastix_kukwesjijk|EP00696_Hemimastix_kukwesjijk_P003251;Meteora_sporadica|NODE_7126_length_1130_cov_59_286249_g5851_i0;Nebulomonas_marisrubri|TRINITY_DN873_c0_g1_TRINITY_DN873_c0_g1_i1_g_78117_m_78117;Nibbleromonas_arcticus|TRINITY_DN486_c0_g1_TRINITY_DN486_c0_g1_i1_g_5344_m_5344;Nibbleromonas_curacaus|TRINITY_DN10281_c0_g1_TRINITY_DN10281_c0_g1_i1_g_14523…
cluster2512	GO:0034314; P:Arp2/3 complex-mediated actin nucleation; IBA:GO_Central	12	Q99PD4	Ancoracysta_twista|GFYU01007406_1_p1;Hemimastix_kukwesjijk|EP00696_Hemimastix_kukwesjijk_P003470;Meteora_sporadica|NODE_6506_length_1251_cov_493_766387_g5335_i0;Nebulomonas_marisrubri|TRINITY_DN11742_c0_g1_TRINITY_DN11742_c0_g1_i1_g_25465_m_25465;Nibbleromonas_arcticus|TRINITY_DN1444_c0_g1_TRINITY_DN1444_c0_g1_i1_g_47569_m_47569;Nibbleromonas_curacaus|TRINITY_DN7970_c0_g1_TRINITY_DN7970_c0_g1_i1_…
cluster2517	GO:0051604; P:protein maturation by iron-sulfur cluster transfer; IEA:InterPro	12	B7VJS9	Ancoracysta_twista|GFYU01007604_1_p1;Hemimastix_kukwesjijk|EP00696_Hemimastix_kukwesjijk_P017068;Hemimastix_kukwesjijk|EP00696_Hemimastix_kukwesjijk_P017069;Meteora_sporadica|NODE_7723_length_1027_cov_34_667702_g6354_i0;Nebulomonas_marisrubri|TRINITY_DN10912_c0_g1_TRINITY_DN10912_c0_g1_i1_g_36323_m_36323;Nibbleromonas_arcticus|TRINITY_DN29637_c0_g1_TRINITY_DN29637_c0_g1_i1_g_12238_m_12238;Nibbler…
cluster2519	GO:0009409; P:response to cold; IEP:TAIR	12	P43333	Ancoracysta_twista|GFYU01007670_1_p1;Hemimastix_kukwesjijk|EP00696_Hemimastix_kukwesjijk_P007694;Hemimastix_kukwesjijk|EP00696_Hemimastix_kukwesjijk_P016753;Meteora_sporadica|NODE_9105_length_804_cov_11_495289_g7546_i0;Nebulomonas_marisrubri|TRINITY_DN7846_c0_g1_TRINITY_DN7846_c0_g1_i2_g_85355_m_85355;Nibbleromonas_arcticus|TRINITY_DN25151_c0_g1_TRINITY_DN25151_c0_g1_i1_g_32380_m_32380;Nibbleromo…
cluster2533	GO:0007566; P:embryo implantation; IEA:Ensembl	12	Q5R9K4	Ancoracysta_twista|GFYU01008494_1_p1;Hemimastix_kukwesjijk|EP00696_Hemimastix_kukwesjijk_P017677;Meteora_sporadica|NODE_4857_length_1591_cov_4_761438_g3931_i0;Nebulomonas_marisrubri|TRINITY_DN12881_c1_g1_TRINITY_DN12881_c1_g1_i2_g_6372_m_6372;Nebulomonas_marisrubri|TRINITY_DN2076_c0_g1_TRINITY_DN2076_c0_g1_i1_g_76546_m_76546;Nibbleromonas_arcticus|TRINITY_DN3049_c0_g1_TRINITY_DN3049_c0_g1_i1_g_39…
cluster2534	GO:0006413; P:translational initiation; IBA:GO_Central	12	A7SDW5	Ancoracysta_twista|GFYU01008581_1_p1;Hemimastix_kukwesjijk|EP00696_Hemimastix_kukwesjijk_P004115;Meteora_sporadica|NODE_4622_length_1650_cov_20_900566_g3744_i0;Nebulomonas_marisrubri|TRINITY_DN2156_c0_g1_TRINITY_DN2156_c0_g1_i1_g_31747_m_31747;Nibbleromonas_arcticus|TRINITY_DN24493_c0_g1_TRINITY_DN24493_c0_g1_i1_g_375_m_375;Nibbleromonas_curacaus|TRINITY_DN2307_c0_g1_TRINITY_DN2307_c0_g1_i1_g_583…
cluster2538	GO:0006433; P:prolyl-tRNA aminoacylation; IEA:UniProtKB-UniRule	12	O26708	Ancoracysta_twista|GFYU01008652_1_p1;Ancoracysta_twista|GFYU01009517_1_p1;Hemimastix_kukwesjijk|EP00696_Hemimastix_kukwesjijk_P010508;Meteora_sporadica|NODE_4453_length_1696_cov_35_450765_g3607_i0;Nebulomonas_marisrubri|TRINITY_DN13190_c0_g1_TRINITY_DN13190_c0_g1_i1_g_68215_m_68215;Nibbleromonas_arcticus|TRINITY_DN122_c0_g1_TRINITY_DN122_c0_g1_i1_g_24245_m_24245;Nibbleromonas_curacaus|TRINITY_DN1…
cluster2539	GO:0016567; P:protein ubiquitination; IDA:UniProtKB	12	Q9AV81	Ancoracysta_twista|GFYU01008857_1_p1;Hemimastix_kukwesjijk|EP00696_Hemimastix_kukwesjijk_P014994;Meteora_sporadica|NODE_4312_length_1735_cov_26_156511_g3497_i0;Nebulomonas_marisrubri|TRINITY_DN8747_c0_g1_TRINITY_DN8747_c0_g1_i1_g_31434_m_31434;Nibbleromonas_arcticus|TRINITY_DN3896_c0_g1_TRINITY_DN3896_c0_g1_i1_g_37969_m_37969;Nibbleromonas_curacaus|TRINITY_DN8989_c0_g1_TRINITY_DN8989_c0_g1_i1_g_7…
cluster2545	GO:0015986; P:ATP synthesis coupled proton transport; IEA:InterPro	12	Q40089	Ancoracysta_twista|GFYU01009351_1_p2;Hemimastix_kukwesjijk|EP00696_Hemimastix_kukwesjijk_P013671;Meteora_sporadica|NODE_9200_length_790_cov_111_419753_g7629_i0;Nebulomonas_marisrubri|TRINITY_DN7749_c0_g2_TRINITY_DN7749_c0_g2_i2_g_78637_m_78637;Nibbleromonas_arcticus|TRINITY_DN17172_c0_g1_TRINITY_DN17172_c0_g1_i1_g_18867_m_18867;Nibbleromonas_curacaus|TRINITY_DN1878_c0_g1_TRINITY_DN1878_c0_g1_i1_g…
cluster2546	GO:0015031; P:protein transport; IEA:UniProtKB-KW	12	Q6P756	Ancoracysta_twista|GFYU01009438_1_p1;Hemimastix_kukwesjijk|EP00696_Hemimastix_kukwesjijk_P008853;Hemimastix_kukwesjijk|EP00696_Hemimastix_kukwesjijk_P008854;Meteora_sporadica|NODE_9216_length_788_cov_118_112792_g7643_i0;Nebulomonas_marisrubri|TRINITY_DN7874_c0_g1_TRINITY_DN7874_c0_g1_i2_g_85277_m_85277;Nibbleromonas_arcticus|TRINITY_DN9558_c0_g1_TRINITY_DN9558_c0_g1_i1_g_19858_m_19858;Nibbleromon…
cluster2549	GO:0007035; P:vacuolar acidification; ISS:UniProtKB	12	Q86A77	Ancoracysta_twista|GFYU01009718_1_p2;Ancoracysta_twista|GFYU01009815_1_p1;Hemimastix_kukwesjijk|EP00696_Hemimastix_kukwesjijk_P003323;Meteora_sporadica|NODE_7714_length_1028_cov_99_434333_g6346_i0;Nebulomonas_marisrubri|TRINITY_DN7796_c0_g1_TRINITY_DN7796_c0_g1_i1_g_78496_m_78496;Nibbleromonas_arcticus|TRINITY_DN24525_c0_g1_TRINITY_DN24525_c0_g1_i1_g_52703_m_52703;Nibbleromonas_curacaus|TRINITY_D…
cluster2551	GO:0042147; P:retrograde transport, endosome to Golgi; IBA:GO_Central	12	Q7X659	Ancoracysta_twista|GFYU01009912_1_p1;Ancoracysta_twista|GFYU01015942_1_p1;Hemimastix_kukwesjijk|EP00696_Hemimastix_kukwesjijk_P003349;Meteora_sporadica|NODE_2583_length_2438_cov_65_667228_g2098_i0;Nebulomonas_marisrubri|TRINITY_DN4298_c0_g1_TRINITY_DN4298_c0_g1_i1_g_6741_m_6741;Nibbleromonas_arcticus|TRINITY_DN23786_c0_g1_TRINITY_DN23786_c0_g1_i1_g_33856_m_33856;Nibbleromonas_curacaus|TRINITY_DN1…
cluster2555	GO:0006383; P:transcription by RNA polymerase III; IEA:GOC	12	Q80UW8	Ancoracysta_twista|GFYU01010006_1_p1;Hemimastix_kukwesjijk|EP00696_Hemimastix_kukwesjijk_P011447;Meteora_sporadica|NODE_9490_length_751_cov_8_443478_g7892_i0;Nebulomonas_marisrubri|TRINITY_DN9086_c0_g1_TRINITY_DN9086_c0_g1_i1_g_42957_m_42957;Nibbleromonas_arcticus|TRINITY_DN5190_c0_g1_TRINITY_DN5190_c0_g1_i1_g_51063_m_51063;Nibbleromonas_curacaus|TRINITY_DN23551_c0_g1_TRINITY_DN23551_c0_g1_i1_g_7…
cluster2559	GO:0008380; P:RNA splicing; TAS:FlyBase	12	P43332	Ancoracysta_twista|GFYU01010283_1_p2;Hemimastix_kukwesjijk|EP00696_Hemimastix_kukwesjijk_P007089;Hemimastix_kukwesjijk|EP00696_Hemimastix_kukwesjijk_P017174;Meteora_sporadica|NODE_9770_length_717_cov_59_707317_g8138_i0;Nebulomonas_marisrubri|TRINITY_DN10721_c0_g1_TRINITY_DN10721_c0_g1_i1_g_41803_m_41803;Nibbleromonas_arcticus|TRINITY_DN2602_c0_g1_TRINITY_DN2602_c0_g1_i1_g_45563_m_45563;Nibbleromo…
cluster2566	GO:0009651; P:response to salt stress; IEP:TAIR	12	Q38884	Ancoracysta_twista|GFYU01010668_1_p1;Hemimastix_kukwesjijk|EP00696_Hemimastix_kukwesjijk_P011722;Meteora_sporadica|NODE_7834_length_1009_cov_20_804852_g6451_i0;Nebulomonas_marisrubri|TRINITY_DN6271_c0_g1_TRINITY_DN6271_c0_g1_i3_g_76121_m_76121;Nibbleromonas_arcticus|TRINITY_DN10301_c0_g1_TRINITY_DN10301_c0_g1_i1_g_14537_m_14537;Nibbleromonas_curacaus|TRINITY_DN10034_c0_g1_TRINITY_DN10034_c0_g1_i1…
cluster2574	GO:0019346; P:transsulfuration; ISO:MGI	12	Q91WT9	Ancoracysta_twista|GFYU01011612_1_p1;Hemimastix_kukwesjijk|EP00696_Hemimastix_kukwesjijk_P012877;Meteora_sporadica|NODE_4582_length_1662_cov_1532_785759_g3708_i0;Nebulomonas_marisrubri|TRINITY_DN7655_c0_g1_TRINITY_DN7655_c0_g1_i1_g_14757_m_14757;Nibbleromonas_arcticus|TRINITY_DN16098_c0_g1_TRINITY_DN16098_c0_g1_i1_g_22573_m_22573;Nibbleromonas_curacaus|TRINITY_DN23130_c0_g1_TRINITY_DN23130_c0_g1_…
cluster2579	GO:0031167; P:rRNA methylation; ISS:UniProtKB	12	Q2KHT8	Ancoracysta_twista|GFYU01012368_1_p1;Ancoracysta_twista|GFYU01017568_1_p2;Hemimastix_kukwesjijk|EP00696_Hemimastix_kukwesjijk_P007152;Meteora_sporadica|NODE_7588_length_1052_cov_15_589304_g6235_i0;Nebulomonas_marisrubri|TRINITY_DN5746_c0_g1_TRINITY_DN5746_c0_g1_i1_g_16000_m_16000;Nibbleromonas_arcticus|TRINITY_DN3361_c0_g1_TRINITY_DN3361_c0_g1_i1_g_54476_m_54476;Nibbleromonas_curacaus|TRINITY_DN2…
cluster2585	GO:0033227; P:dsRNA transport; IMP:FlyBase	12	Q9V3J1	Ancoracysta_twista|GFYU01013221_1_p1;Hemimastix_kukwesjijk|EP00696_Hemimastix_kukwesjijk_P009791;Meteora_sporadica|NODE_5498_length_1441_cov_117_613768_g4467_i0;Nebulomonas_marisrubri|TRINITY_DN14218_c3_g1_TRINITY_DN14218_c3_g1_i3_g_22385_m_22385;Nibbleromonas_arcticus|TRINITY_DN2750_c0_g1_TRINITY_DN2750_c0_g1_i1_g_47995_m_47995;Nibbleromonas_curacaus|TRINITY_DN9773_c0_g1_TRINITY_DN9773_c0_g1_i2_…
cluster2591	GO:0007165; P:signal transduction; ISS:TAIR	12	Q38867	Ancoracysta_twista|GFYU01014100_1_p2;Hemimastix_kukwesjijk|EP00696_Hemimastix_kukwesjijk_P010031;Meteora_sporadica|NODE_6800_length_1190_cov_44_505757_g5579_i0;Nebulomonas_marisrubri|TRINITY_DN25519_c0_g1_TRINITY_DN25519_c0_g1_i1_g_67013_m_67013;Nibbleromonas_arcticus|TRINITY_DN17878_c0_g1_TRINITY_DN17878_c0_g1_i1_g_18956_m_18956;Nibbleromonas_arcticus|TRINITY_DN3919_c1_g1_TRINITY_DN3919_c1_g1_i1…
cluster2595	GO:0007219; P:Notch signaling pathway; IEA:UniProtKB-KW	12	Q7ZXK9	Ancoracysta_twista|GFYU01015118_1_p1;Hemimastix_kukwesjijk|EP00696_Hemimastix_kukwesjijk_P004958;Hemimastix_kukwesjijk|EP00696_Hemimastix_kukwesjijk_P017407;Meteora_sporadica|NODE_4052_length_1813_cov_30_836758_g3286_i0;Nebulomonas_marisrubri|TRINITY_DN6922_c0_g1_TRINITY_DN6922_c0_g1_i1_g_24487_m_24487;Nibbleromonas_arcticus|TRINITY_DN17212_c0_g1_TRINITY_DN17212_c0_g1_i1_g_12019_m_12019;Nibblerom…
cluster2604	GO:0008121; F:ubiquinol-cytochrome-c reductase activity; IEA:UniProtKB-EC	12	P29677	Ancoracysta_twista|GFYU01015791_1_p1;Ancoracysta_twista|GFYU01025869_1_p1;Hemimastix_kukwesjijk|EP00696_Hemimastix_kukwesjijk_P020164;Meteora_sporadica|NODE_4818_length_1601_cov_34_688312_g3903_i0;Nebulomonas_marisrubri|TRINITY_DN32686_c0_g1_TRINITY_DN32686_c0_g1_i1_g_33691_m_33691;Nibbleromonas_arcticus|TRINITY_DN4300_c0_g1_TRINITY_DN4300_c0_g1_i1_g_35550_m_35550;Nibbleromonas_curacaus|TRINITY_D…
cluster2613	GO:0006065; P:UDP-glucuronate biosynthetic process; IDA:UniProtKB	12	Q9FZE1	Ancoracysta_twista|GFYU01017129_1_p1;Hemimastix_kukwesjijk|EP00696_Hemimastix_kukwesjijk_P007940;Meteora_sporadica|NODE_3622_length_1972_cov_48_256410_g2932_i0;Nebulomonas_marisrubri|TRINITY_DN11638_c0_g1_TRINITY_DN11638_c0_g1_i1_g_43838_m_43838;Nibbleromonas_arcticus|TRINITY_DN4402_c0_g1_TRINITY_DN4402_c0_g1_i2_g_10813_m_10813;Nibbleromonas_arcticus|TRINITY_DN4548_c0_g1_TRINITY_DN4548_c0_g1_i1_g…
cluster2625	GO:0000723; P:telomere maintenance; NAS:PomBase	12	Q92374	Ancoracysta_twista|GFYU01017863_1_p2;Hemimastix_kukwesjijk|EP00696_Hemimastix_kukwesjijk_P019017;Meteora_sporadica|NODE_12105_length_447_cov_51_769430_g10344_i0;Nebulomonas_marisrubri|TRINITY_DN5218_c0_g1_TRINITY_DN5218_c0_g1_i1_g_51336_m_51336;Nebulomonas_marisrubri|TRINITY_DN5218_c0_g1_TRINITY_DN5218_c0_g1_i2_g_51337_m_51337;Nibbleromonas_arcticus|TRINITY_DN13525_c0_g1_TRINITY_DN13525_c0_g1_i1_…
cluster2632	GO:0000375; P:RNA splicing, via transesterification reactions; TAS:ProtInc	12	Q15427	Ancoracysta_twista|GFYU01018612_1_p1;Hemimastix_kukwesjijk|EP00696_Hemimastix_kukwesjijk_P016522;Hemimastix_kukwesjijk|EP00696_Hemimastix_kukwesjijk_P016523;Meteora_sporadica|NODE_5976_length_1345_cov_11_960280_g4878_i0;Nebulomonas_marisrubri|TRINITY_DN1817_c0_g1_TRINITY_DN1817_c0_g1_i1_g_18846_m_18846;Nibbleromonas_arcticus|TRINITY_DN1511_c0_g1_TRINITY_DN1511_c0_g1_i1_g_48876_m_48876;Nibbleromon…
cluster2638	GO:2000815; P:regulation of mRNA stability involved in response to oxidative stress; IMP:PomBase	12	Q09868	Ancoracysta_twista|GFYU01019545_1_p1;Hemimastix_kukwesjijk|EP00696_Hemimastix_kukwesjijk_P014427;Meteora_sporadica|NODE_8152_length_959_cov_6_457684_g6718_i0;Nebulomonas_marisrubri|TRINITY_DN13377_c2_g12_TRINITY_DN13377_c2_g12_i1_g_75898_m_75898;Nibbleromonas_arcticus|TRINITY_DN15621_c0_g1_TRINITY_DN15621_c0_g1_i1_g_30438_m_30438;Nibbleromonas_curacaus|TRINITY_DN7795_c0_g1_TRINITY_DN7795_c0_g1_i1…
cluster2654	GO:0006886; P:intracellular protein transport; IEA:InterPro	12	Q8I8U2	Ancoracysta_twista|GFYU01023394_1_p1;Ancoracysta_twista|GFYU01059881_1_p1;Hemimastix_kukwesjijk|EP00696_Hemimastix_kukwesjijk_P003627;Meteora_sporadica|NODE_857_length_4071_cov_36_498005_g700_i0;Nebulomonas_marisrubri|TRINITY_DN9505_c0_g1_TRINITY_DN9505_c0_g1_i1_g_79392_m_79392;Nibbleromonas_arcticus|TRINITY_DN7084_c0_g1_TRINITY_DN7084_c0_g1_i1_g_32526_m_32526;Nibbleromonas_curacaus|TRINITY_DN768…
cluster2663	GO:0030488; P:tRNA methylation; ISS:dictyBase	12	Q86JJ0	Ancoracysta_twista|GFYU01024562_1_p1;Hemimastix_kukwesjijk|EP00696_Hemimastix_kukwesjijk_P008739;Hemimastix_kukwesjijk|EP00696_Hemimastix_kukwesjijk_P008740;Meteora_sporadica|NODE_7160_length_1124_cov_16_557855_g5880_i0;Nebulomonas_marisrubri|TRINITY_DN3931_c0_g1_TRINITY_DN3931_c0_g1_i1_g_37382_m_37382;Nibbleromonas_arcticus|TRINITY_DN12184_c0_g1_TRINITY_DN12184_c0_g1_i1_g_46202_m_46202;Nibblerom…
cluster2669	GO:0046686; P:response to cadmium ion; IEP:TAIR	12	Q9M5K3	Ancoracysta_twista|GFYU01025897_1_p2;Hemimastix_kukwesjijk|EP00696_Hemimastix_kukwesjijk_P017632;Meteora_sporadica|NODE_4584_length_1661_cov_68_287500_g3710_i0;Nebulomonas_marisrubri|TRINITY_DN3869_c0_g1_TRINITY_DN3869_c0_g1_i1_g_4933_m_4933;Nibbleromonas_arcticus|TRINITY_DN10492_c0_g1_TRINITY_DN10492_c0_g1_i1_g_26034_m_26034;Nibbleromonas_curacaus|TRINITY_DN10514_c0_g1_TRINITY_DN10514_c0_g1_i1_g…
cluster2677	GO:0006412; P:translation; IBA:GO_Central	12	Q54ZD1	Ancoracysta_twista|GFYU01028613_1_p1;Hemimastix_kukwesjijk|EP00696_Hemimastix_kukwesjijk_P002386;Meteora_sporadica|NODE_8562_length_890_cov_14_344994_g7073_i0;Nebulomonas_marisrubri|TRINITY_DN2531_c0_g1_TRINITY_DN2531_c0_g1_i1_g_81027_m_81027;Nibbleromonas_arcticus|TRINITY_DN13187_c0_g1_TRINITY_DN13187_c0_g1_i1_g_54545_m_54545;Nibbleromonas_curacaus|TRINITY_DN2664_c0_g1_TRINITY_DN2664_c0_g1_i1_g_…
cluster2687	GO:0000462; P:maturation of SSU-rRNA from tricistronic rRNA transcript (SSU-rRNA, 58S rRNA, LSU-rRNA); ISO:PomBase	12	O60188	Ancoracysta_twista|GFYU01032026_1_p1;Hemimastix_kukwesjijk|EP00696_Hemimastix_kukwesjijk_P013348;Meteora_sporadica|NODE_3461_length_2033_cov_3_938641_g2798_i0;Nebulomonas_marisrubri|TRINITY_DN10105_c0_g1_TRINITY_DN10105_c0_g1_i1_g_34096_m_34096;Nibbleromonas_arcticus|TRINITY_DN17656_c0_g1_TRINITY_DN17656_c0_g1_i1_g_18338_m_18338;Nibbleromonas_arcticus|TRINITY_DN19576_c0_g1_TRINITY_DN19576_c0_g1_i…
cluster2690	GO:0006491; P:N-glycan processing; ISS:UniProtKB	12	P79403	Ancoracysta_twista|GFYU01032383_1_p1;Hemimastix_kukwesjijk|EP00696_Hemimastix_kukwesjijk_P010827;Meteora_sporadica|NODE_1772_length_2956_cov_15_400691_g1449_i0;Meteora_sporadica|NODE_2111_length_2726_cov_62_841276_g1717_i0;Nebulomonas_marisrubri|TRINITY_DN10862_c0_g1_TRINITY_DN10862_c0_g1_i1_g_19217_m_19217;Nibbleromonas_arcticus|TRINITY_DN1235_c0_g1_TRINITY_DN1235_c0_g1_i1_g_47152_m_47152;Nibble…
cluster2691	GO:0006369; P:termination of RNA polymerase II transcription; IBA:GO_Central	12	Q6C195	Ancoracysta_twista|GFYU01032431_1_p1;Hemimastix_kukwesjijk|EP00696_Hemimastix_kukwesjijk_P006281;Hemimastix_kukwesjijk|EP00696_Hemimastix_kukwesjijk_P007877;Meteora_sporadica|NODE_10343_length_644_cov_41_933105_g8655_i0;Nebulomonas_marisrubri|TRINITY_DN5369_c0_g1_TRINITY_DN5369_c0_g1_i1_g_72930_m_72930;Nibbleromonas_arcticus|TRINITY_DN2650_c0_g1_TRINITY_DN2650_c0_g1_i1_g_45599_m_45599;Nibbleromon…
cluster2697	GO:0032968; P:positive regulation of transcription elongation from RNA polymerase II promoter; ISO:MGI	12	Q5BU09	Ancoracysta_twista|GFYU01033363_1_p1;Hemimastix_kukwesjijk|EP00696_Hemimastix_kukwesjijk_P014253;Meteora_sporadica|NODE_10568_length_618_cov_5_236984_g8865_i0;Nebulomonas_marisrubri|TRINITY_DN13533_c3_g1_TRINITY_DN13533_c3_g1_i1_g_89991_m_89991;Nibbleromonas_arcticus|TRINITY_DN22765_c0_g1_TRINITY_DN22765_c0_g1_i1_g_11342_m_11342;Nibbleromonas_curacaus|TRINITY_DN9409_c0_g1_TRINITY_DN9409_c0_g1_i2_…
[truncated: 116 more rows]

## Sheet: Disparia - Categorised
Biological Process				Molecular Function				Cellular Component
[truncated: 160 more rows]

## Sheet: Membrifera
Cluster ID	GO Annotation	Number of proteins	Swiss_Prot hit	Protein list
[truncated: 28 more rows]

[truncated: 5 more sheets: Membrifera - Categorised, Caelestes, Caelestes - Categorised, Solarion - Categorised, Solarion]
