# Supplementary material for: Rare microbial relict sheds light on an ancient eukaryotic supergroup
Source: Research Square preprint supplement (doi:10.21203/rs.3.rs-5245440/v1), 2025-05-15
Supplement: Supplementary file 4 [file c970f346fa96a6922f865656.xlsx]

## Sheet: Sheet1
Tree		logL	deltaL	bp-RELL		p-KH		p-SH		c-ELW		p-AU
1	H0. Best Tree under ELM+C60+G+PMSF	-5.64404e+06	0	0.678	+	0.701	+	1	+	0.677	+	0.802	+	H0. Best Tree under ELM+C60+G+PMSF	N/A	[ tree 1 lh=-5.64404e+06 ](AcanthFB:0.2442874800,((((((Ammo1384:0.7669628487,(((Aurisoli:0.3286200808,MatazaD1:0.3255367648):0.0531336326,Bigenata:0.4880217119):0.0696586538,Plasbras:0.4618536541):0.0270272370):0.0997025405,(((Auralima:0.5024085567,(BicoCB20:0.3975017770,Wobbluna:0.4974296498):0.0375764089):0.0224052073,((Deveeleg:0.3550647897,Phytpara:0.2951512915):0.0250491981,((EctocSP7:0.2495…
2	H1. Membrifera sister to the rest of the Diaphoretickes	-5.64412e+06	75.267	0.0212	-	0.044	-	0.434	+	0.0214	-	0.0495	-	H1. Membrifera sister to the rest of the Diaphoretickes	(((Hemikukw,SpirCILI,MetesporLBC3,MetesporSRT610,Solaarie),(Ancytwis,Nebumari,Nibbcura,Nibbquar,Ubysfret,Ammo1384,Aurisoli,MatazaD1,Bigenata,Plasbras,Auralima,BicoCB20,Wobbluna,Deveeleg,Phytpara,EctocSP7,Heteakas,Ochr2298,Noctscin,Oxyrmari,Plasfalc,Toxogond,Vitrbras,Paratetr,Stencoer,TeloneP2,Telosubt,Calclept,Pleucart,Gephhuxl,Prymparv,ChoanoFB,AcanthFB,Raphhete,Arabthal,Physpate,Mesoviri,Nephpy…	[ tree 2 lh=-5644119.6901445147 ](AcanthFB:0.2442962173,((((((Ammo1384:0.7673414870,(((Aurisoli:0.3288261861,MatazaD1:0.3255463047):0.0531867187,Bigenata:0.4883527888):0.0699349453,Plasbras:0.4616856716):0.0268702989):0.1000221455,(((Auralima:0.5027242194,(BicoCB20:0.3975455167,Wobbluna:0.4976272046):0.0376810688):0.0224334337,((Deveeleg:0.3552167945,Phytpara:0.2952720642):0.0250105532,((EctocSP7…
3	H2. Membrifera sister to (Haptophyta+Centroheliozoa)	-5.64419e+06	141.42	0	-	0	-	0.103	+	2.13e-14	-	1.05e-07	-	H2. Membrifera sister to (Haptophyta+Centroheliozoa)	(((Hemikukw,SpirCILI,MetesporLBC3,MetesporSRT610,Solaarie),(Calclept,Pleucart,Gephhuxl,Prymparv,ChoanoFB,AcanthFB,Raphhete)),(Ancytwis,Nebumari,Nibbcura,Nibbquar,Ubysfret,Arabthal,Physpate,Mesoviri,Nephpyri,Volvcart,Cyanpara,COSAG02,Galdphle,Gracchor,Porppurp,Rhodemar,Goniavon,Hemimari,Guilthet,Hemirufe,Roomtrun,Palpbili,Mhelmari,Ancysigm,Nutolong,Fabotrop,Gefiokel,Capsowcz,Homosapi,Monobrev,Parv…	[ tree 3 lh=-5644185.8430590294 ](AcanthFB:0.2446578618,(((((((Ammo1384:0.7685061992,(((Aurisoli:0.3290689626,MatazaD1:0.3259442070):0.0532528230,Bigenata:0.4887408863):0.0699447930,Plasbras:0.4623688878):0.0269611828):0.1001157885,(((Auralima:0.5032193726,(BicoCB20:0.3980794802,Wobbluna:0.4981944535):0.0375387434):0.0224508169,((Deveeleg:0.3555344635,Phytpara:0.2955192546):0.0250538909,((EctocSP…
4	H3. Membrifera sister to (Cryptista+Archaeplastida+Microheliella)	-5.64415e+06	101.44	0.0027	-	0.0084	-	0.227	+	0.00265	-	0.0151	-	H3. Membrifera sister to (Cryptista+Archaeplastida+Microheliella)	(((Hemikukw,SpirCILI,MetesporLBC3,MetesporSRT610,Solaarie),(Arabthal,Physpate,Mesoviri,Nephpyri,Volvcart,Cyanpara,COSAG02,Galdphle,Gracchor,Porppurp,Rhodemar,Goniavon,Hemimari,Guilthet,Hemirufe,Roomtrun,Palpbili,Mhelmari)),(Ancytwis,Nebumari,Nibbcura,Nibbquar,Ubysfret,Ammo1384,Aurisoli,MatazaD1,Bigenata,Plasbras,Auralima,BicoCB20,Wobbluna,Deveeleg,Phytpara,EctocSP7,Heteakas,Ochr2298,Noctscin,Oxyr…	[ tree 4 lh=-5644145.8631677758 ](AcanthFB:0.2443492411,((((((Ammo1384:0.7667330610,(((Aurisoli:0.3289093295,MatazaD1:0.3254930197):0.0531535409,Bigenata:0.4884973188):0.0697487397,Plasbras:0.4619986101):0.0271593281):0.0995931811,(((Auralima:0.5027801308,(BicoCB20:0.3976864286,Wobbluna:0.4977160932):0.0377030060):0.0223996751,((Deveeleg:0.3551236057,Phytpara:0.2953386255):0.0249898494,((EctocSP7…
5	H4. Membrifera sister to Pancryptista	-5.64443e+06	389.28	0	-	0	-	0	-	1.77e-80	-	0.000154	-	H4. Membrifera sister to Pancryptista	(((Hemikukw,SpirCILI,MetesporLBC3,MetesporSRT610,Solaarie),(Goniavon,Hemimari,Guilthet,Hemirufe,Roomtrun,Palpbili,Mhelmari)),(Ancytwis,Nebumari,Nibbcura,Nibbquar,Ubysfret,Arabthal,Physpate,Mesoviri,Nephpyri,Volvcart,Cyanpara,COSAG02,Galdphle,Gracchor,Porppurp,Rhodemar,Ammo1384,Aurisoli,MatazaD1,Bigenata,Plasbras,Auralima,BicoCB20,Wobbluna,Deveeleg,Phytpara,EctocSP7,Heteakas,Ochr2298,Noctscin,Oxyr…	[ tree 5 lh=-5644433.7008260936 ](AcanthFB:0.2443305110,((((((Ammo1384:0.7669722943,(((Aurisoli:0.3289431486,MatazaD1:0.3255992604):0.0530658699,Bigenata:0.4888034895):0.0699448521,Plasbras:0.4620463362):0.0270504757):0.0997240002,(((Auralima:0.5028422523,(BicoCB20:0.3977887569,Wobbluna:0.4978927454):0.0377416798):0.0225030362,((Deveeleg:0.3552574868,Phytpara:0.2953835605):0.0249107167,((EctocSP7…
6	H5. Membrifera sister to Archaeplastida	-5.64446e+06	416.95	0	-	0	-	0	-	1.85e-100	-	0.00075	-	H5. Membrifera sister to Archaeplastida	(((Hemikukw,SpirCILI,MetesporLBC3,MetesporSRT610,Solaarie),(Arabthal,Physpate,Mesoviri,Nephpyri,Volvcart,Cyanpara,COSAG02,Galdphle,Gracchor,Porppurp,Rhodemar)),(Ancytwis,Nebumari,Nibbcura,Nibbquar,Ubysfret,Goniavon,Hemimari,Guilthet,Hemirufe,Roomtrun,Palpbili,Mhelmari,Ammo1384,Aurisoli,MatazaD1,Bigenata,Plasbras,Auralima,BicoCB20,Wobbluna,Deveeleg,Phytpara,EctocSP7,Heteakas,Ochr2298,Noctscin,Oxyr…	[ tree 6 lh=-5644461.3702301737 ](AcanthFB:0.2443648176,((((((Ammo1384:0.7672484623,(((Aurisoli:0.3290073699,MatazaD1:0.3256850572):0.0530858784,Bigenata:0.4889735433):0.0699625553,Plasbras:0.4622374478):0.0270489377):0.0998276905,(((Auralima:0.5029416778,(BicoCB20:0.3979270098,Wobbluna:0.4979412835):0.0377314154):0.0225127102,((Deveeleg:0.3553073027,Phytpara:0.2955216434):0.0249110031,((EctocSP7…
7	H6. Membrifera sister to TSAR	-5.64421e+06	166.35	0	-	0	-	0.043	-	2.99e-26	-	3.09e-91	-	H6. Membrifera sister to TSAR	(((Hemikukw,SpirCILI,MetesporLBC3,MetesporSRT610,Solaarie),(Ammo1384,Aurisoli,MatazaD1,Bigenata,Plasbras,Auralima,BicoCB20,Wobbluna,Deveeleg,Phytpara,EctocSP7,Heteakas,Ochr2298,Noctscin,Oxyrmari,Plasfalc,Toxogond,Vitrbras,Paratetr,Stencoer,TeloneP2,Telosubt)),(Ancytwis,Nebumari,Nibbcura,Nibbquar,Ubysfret,Goniavon,Hemimari,Guilthet,Hemirufe,Roomtrun,Palpbili,Mhelmari,Arabthal,Physpate,Mesoviri,Nep…	[ tree 7 lh=-5644210.7712880336 ](AcanthFB:0.2445382982,(((((((Ammo1384:0.7681880823,(((Aurisoli:0.3289761323,MatazaD1:0.3259445132):0.0532022319,Bigenata:0.4887745170):0.0699097701,Plasbras:0.4622252136):0.0269768273):0.1001066530,(((Auralima:0.5031339248,(BicoCB20:0.3980328575,Wobbluna:0.4981237804):0.0375820099):0.0224052142,((Deveeleg:0.3554525496,Phytpara:0.2954523572):0.0250246127,((EctocSP…
8	H7. Membrifera sister to Opimoda (=Obazoa, Amoebozoa, CRuMs, Malawimonadida, Ancyromonadida)	-5.64441e+06	369.39	0	-	0	-	0	-	1.01e-78	-	1.81e-44	-	H7. Membrifera sister to Opimoda (=Obazoa, Amoebozoa, CRuMs, Malawimonadida, Ancyromonadida)	(((Hemikukw,SpirCILI,MetesporLBC3,MetesporSRT610,Solaarie),(Ancysigm,Nutolong,Fabotrop,Gefiokel,Capsowcz,Homosapi,Monobrev,Parvatla,Spizpunc,Thectrah,Pygsbifo,Cochminu,Stratubu,Protfung,Schivulg,Vermverm,Diphrota,Rigiramo,Mantplas)),(Ancytwis,Nebumari,Nibbcura,Nibbquar,Ubysfret,Ammo1384,Aurisoli,MatazaD1,Bigenata,Plasbras,Auralima,BicoCB20,Wobbluna,Deveeleg,Phytpara,EctocSP7,Heteakas,Ochr2298,Noc…	[ tree 8 lh=-5644413.8105141418 ](AcanthFB:0.2441903560,((((((Ammo1384:0.7673550008,(((Aurisoli:0.3287047011,MatazaD1:0.3256107920):0.0530737611,Bigenata:0.4883655248):0.0699073356,Plasbras:0.4618277267):0.0268516707):0.0998953389,(((Auralima:0.5024897943,(BicoCB20:0.3975815600,Wobbluna:0.4975644440):0.0376565724):0.0224015966,((Deveeleg:0.3552365448,Phytpara:0.2952444389):0.0250075381,((EctocSP7…
9	H8. Membrifera sister to Discoba	-5.64435e+06	305.72	0	-	0	-	0.0002	-	9.62e-44	-	1.05e-53	-	H8. Membrifera sister to Discoba	(((Hemikukw,SpirCILI,MetesporLBC3,MetesporSRT610,Solaarie),(Andagodo,Styginca,Eugllong,Trypbruc,Naeggrub,Pharkirb)),(Ancytwis,Nebumari,Nibbcura,Nibbquar,Ubysfret,Ammo1384,Aurisoli,MatazaD1,Bigenata,Plasbras,Auralima,BicoCB20,Wobbluna,Deveeleg,Phytpara,EctocSP7,Heteakas,Ochr2298,Noctscin,Oxyrmari,Plasfalc,Toxogond,Vitrbras,Paratetr,Stencoer,TeloneP2,Telosubt,Goniavon,Hemimari,Guilthet,Hemirufe,Roo…	[ tree 9 lh=-5644350.1411381429 ](AcanthFB:0.2442281831,((((((Ammo1384:0.7672048676,(((Aurisoli:0.3287362364,MatazaD1:0.3256260771):0.0530761897,Bigenata:0.4884273846):0.0699233638,Plasbras:0.4619026360):0.0269586601):0.0998948609,(((Auralima:0.5025547814,(BicoCB20:0.3974683129,Wobbluna:0.4976254691):0.0377335899):0.0224197798,((Deveeleg:0.3552469914,Phytpara:0.2951713904):0.0250069462,((EctocSP7…
10	H9. Membrifera sister to Metamonada	-5.64447e+06	423.35	0	-	0	-	0	-	6.08e-90	-	3.28e-55	-	H9. Membrifera sister to Metamonada	(((Hemikukw,SpirCILI,MetesporLBC3,MetesporSRT610,Solaarie),(Anaeigna,Tricvagi,Barthesp,Carpmemb,Parapyri)),(Ancytwis,Nebumari,Nibbcura,Nibbquar,Ubysfret,Ammo1384,Aurisoli,MatazaD1,Bigenata,Plasbras,Auralima,BicoCB20,Wobbluna,Deveeleg,Phytpara,EctocSP7,Heteakas,Ochr2298,Noctscin,Oxyrmari,Plasfalc,Toxogond,Vitrbras,Paratetr,Stencoer,TeloneP2,Telosubt,Goniavon,Hemimari,Guilthet,Hemirufe,Roomtrun,Pal…	[ tree 10 lh=-5644467.7701679375 ](AcanthFB:0.2441094271,((((((Ammo1384:0.7670302457,(((Aurisoli:0.3286236960,MatazaD1:0.3253987392):0.0530206700,Bigenata:0.4882383281):0.0699527702,Plasbras:0.4614669394):0.0268851023):0.0998942627,(((Auralima:0.5023619621,(BicoCB20:0.3972559742,Wobbluna:0.4973263832):0.0376802310):0.0224042025,((Deveeleg:0.3550827552,Phytpara:0.2951179417):0.0250005532,((EctocSP…
11	H10. DISPARIA sister to the rest of the Diaphoretickes	-5.64406e+06	18.766	0.282	+	0.299	+	0.92	+	0.281	+	0.374	+	H10. DISPARIA sister to the rest of the Diaphoretickes	(((Hemikukw,SpirCILI,MetesporLBC3,MetesporSRT610,Solaarie,Ancytwis,Nebumari,Nibbcura,Nibbquar,Ubysfret),(Ammo1384,Aurisoli,MatazaD1,Bigenata,Plasbras,Auralima,BicoCB20,Wobbluna,Deveeleg,Phytpara,EctocSP7,Heteakas,Ochr2298,Noctscin,Oxyrmari,Plasfalc,Toxogond,Vitrbras,Paratetr,Stencoer,TeloneP2,Telosubt,Calclept,Pleucart,Gephhuxl,Prymparv,ChoanoFB,AcanthFB,Raphhete,Arabthal,Physpate,Mesoviri,Nephpy…	[ tree 11 lh=-5644063.1893001692 ](AcanthFB:0.2442955821,((((((Ammo1384:0.7665542923,(((Aurisoli:0.3285845156,MatazaD1:0.3252840485):0.0529931076,Bigenata:0.4882084061):0.0698485686,Plasbras:0.4617270885):0.0269559814):0.0998357771,(((Auralima:0.5020561998,(BicoCB20:0.3974725156,Wobbluna:0.4970749905):0.0375334040):0.0223647292,((Deveeleg:0.3550082598,Phytpara:0.2950327874):0.0250061926,((EctocSP…
12	H11. DISPARIA sister to (Haptophyta+Centroheliozoa)	-5.64414e+06	93.041	0.0001	-	0.0005	-	0.317	+	9.82e-05	-	0.000136	-	H11. DISPARIA sister to (Haptophyta+Centroheliozoa)	(((Ancytwis,Nebumari,Nibbcura,Nibbquar,Ubysfret,Hemikukw,SpirCILI,MetesporLBC3,MetesporSRT610,Solaarie),(Calclept,Pleucart,Gephhuxl,Prymparv,ChoanoFB,AcanthFB,Raphhete)),(Arabthal,Physpate,Mesoviri,Nephpyri,Volvcart,Cyanpara,COSAG02,Galdphle,Gracchor,Porppurp,Rhodemar,Goniavon,Hemimari,Guilthet,Hemirufe,Roomtrun,Palpbili,Mhelmari,Ancysigm,Nutolong,Fabotrop,Gefiokel,Capsowcz,Homosapi,Monobrev,Parv…	[ tree 12 lh=-5644137.4635504521 ](AcanthFB:0.2446705810,(((((((Ammo1384:0.7678133368,(((Aurisoli:0.3288260952,MatazaD1:0.3257731918):0.0531905234,Bigenata:0.4884722549):0.0698064117,Plasbras:0.4624921749):0.0270953706):0.0999037293,(((Auralima:0.5029266115,(BicoCB20:0.3978897025,Wobbluna:0.4976957942):0.0375016464):0.0224425284,((Deveeleg:0.3552682855,Phytpara:0.2954618869):0.0250408669,((EctocS…
13	H12. DISPARIA sister to (Cryptista+Archaeplastida+Microheliella)	-5.6441e+06	53.197	0.0166	-	0.0524	+	0.663	+	0.0175	-	0.0471	-	H12. DISPARIA sister to (Cryptista+Archaeplastida+Microheliella)	(((Ancytwis,Nebumari,Nibbcura,Nibbquar,Ubysfret,Hemikukw,SpirCILI,MetesporLBC3,MetesporSRT610,Solaarie),(Arabthal,Physpate,Mesoviri,Nephpyri,Volvcart,Cyanpara,COSAG02,Galdphle,Gracchor,Porppurp,Rhodemar,Goniavon,Hemimari,Guilthet,Hemirufe,Roomtrun,Palpbili,Mhelmari)),(Ammo1384,Aurisoli,MatazaD1,Bigenata,Plasbras,Auralima,BicoCB20,Wobbluna,Deveeleg,Phytpara,EctocSP7,Heteakas,Ochr2298,Noctscin,Oxyr…	[ tree 13 lh=-5644097.6197126377 ](AcanthFB:0.2443264532,((((((Ammo1384:0.7663612843,(((Aurisoli:0.3286578781,MatazaD1:0.3252542169):0.0529730659,Bigenata:0.4880659408):0.0695050281,Plasbras:0.4622048393):0.0269959577):0.0994637130,(((Auralima:0.5018260802,(BicoCB20:0.3976844882,Wobbluna:0.4972558480):0.0376023625):0.0223445760,((Deveeleg:0.3548647120,Phytpara:0.2951576369):0.0249748387,((EctocSP…
14	H13. DISPARIA sister to Pancryptista	-5.6445e+06	451.79	0	-	0	-	0	-	9.73e-113	-	1.34e-73	-	H13. DISPARIA sister to Pancryptista	(((Ancytwis,Nebumari,Nibbcura,Nibbquar,Ubysfret,Hemikukw,SpirCILI,MetesporLBC3,MetesporSRT610,Solaarie),(Goniavon,Hemimari,Guilthet,Hemirufe,Roomtrun,Palpbili,Mhelmari)),(Arabthal,Physpate,Mesoviri,Nephpyri,Volvcart,Cyanpara,COSAG02,Galdphle,Gracchor,Porppurp,Rhodemar,Ammo1384,Aurisoli,MatazaD1,Bigenata,Plasbras,Auralima,BicoCB20,Wobbluna,Deveeleg,Phytpara,EctocSP7,Heteakas,Ochr2298,Noctscin,Oxyr…	[ tree 14 lh=-5644496.2156411540 ](AcanthFB:0.2442852973,((((((Ammo1384:0.7668164035,(((Aurisoli:0.3287488379,MatazaD1:0.3253384524):0.0529141131,Bigenata:0.4882761579):0.0696269132,Plasbras:0.4622775987):0.0268910292):0.0995677908,(((Auralima:0.5017445430,(BicoCB20:0.3978315218,Wobbluna:0.4972973544):0.0376038782):0.0224038841,((Deveeleg:0.3549260619,Phytpara:0.2952285710):0.0249025026,((EctocSP…
15	H14. DISPARIA sister to Archaeplastida	-5.64447e+06	428.12	0	-	0	-	0	-	1.15e-99	-	2.72e-69	-	H14. DISPARIA sister to Archaeplastida	(((Ancytwis,Nebumari,Nibbcura,Nibbquar,Ubysfret,Hemikukw,SpirCILI,MetesporLBC3,MetesporSRT610,Solaarie),(Arabthal,Physpate,Mesoviri,Nephpyri,Volvcart,Cyanpara,COSAG02,Galdphle,Gracchor,Porppurp,Rhodemar)),(Goniavon,Hemimari,Guilthet,Hemirufe,Roomtrun,Palpbili,Mhelmari,Ammo1384,Aurisoli,MatazaD1,Bigenata,Plasbras,Auralima,BicoCB20,Wobbluna,Deveeleg,Phytpara,EctocSP7,Heteakas,Ochr2298,Noctscin,Oxyr…	[ tree 15 lh=-5644472.5431590620 ](AcanthFB:0.2443467887,((((((Ammo1384:0.7665803527,(((Aurisoli:0.3288048340,MatazaD1:0.3253401631):0.0528388814,Bigenata:0.4882686655):0.0696463995,Plasbras:0.4624826262):0.0269531670):0.0995939900,(((Auralima:0.5017485724,(BicoCB20:0.3979044574,Wobbluna:0.4972256662):0.0375580197):0.0223985783,((Deveeleg:0.3549525454,Phytpara:0.2952972479):0.0249041486,((EctocSP…
16	H15. DISPARIA sister to TSAR	-5.64417e+06	124.71	0	-	0	-	0.148	+	2.37e-24	-	8.45e-86	-	H15. DISPARIA sister to TSAR	(((Ancytwis,Nebumari,Nibbcura,Nibbquar,Ubysfret,Hemikukw,SpirCILI,MetesporLBC3,MetesporSRT610,Solaarie),(Ammo1384,Aurisoli,MatazaD1,Bigenata,Plasbras,Auralima,BicoCB20,Wobbluna,Deveeleg,Phytpara,EctocSP7,Heteakas,Ochr2298,Noctscin,Oxyrmari,Plasfalc,Toxogond,Vitrbras,Paratetr,Stencoer,TeloneP2,Telosubt)),(Goniavon,Hemimari,Guilthet,Hemirufe,Roomtrun,Palpbili,Mhelmari,Arabthal,Physpate,Mesoviri,Nep…	[ tree 16 lh=-5644169.1374404486 ](AcanthFB:0.2446217035,(((((((Ammo1384:0.7681573311,(((Aurisoli:0.3288827397,MatazaD1:0.3259039249):0.0532853671,Bigenata:0.4886369967):0.0697651647,Plasbras:0.4626121546):0.0270834836):0.1000971949,(((Auralima:0.5030089513,(BicoCB20:0.3979250363,Wobbluna:0.4979959883):0.0375420029):0.0224557065,((Deveeleg:0.3553521792,Phytpara:0.2954836088):0.0250387389,((EctocS…
17	H16. DISPARIA sister to Opimoda (=Obazoa, Amoebozoa, CRuMs, Malawimonadida, Ancyromonadida)	-5.64446e+06	419.95	0	-	0	-	0	-	5.99e-106	-	0.000476	-	H16. DISPARIA sister to Opimoda (=Obazoa, Amoebozoa, CRuMs, Malawimonadida, Ancyromonadida)	(((Ancytwis,Nebumari,Nibbcura,Nibbquar,Ubysfret,Hemikukw,SpirCILI,MetesporLBC3,MetesporSRT610,Solaarie),(Ancysigm,Nutolong,Fabotrop,Gefiokel,Capsowcz,Homosapi,Monobrev,Parvatla,Spizpunc,Thectrah,Pygsbifo,Cochminu,Stratubu,Protfung,Schivulg,Vermverm,Diphrota,Rigiramo,Mantplas)),(Ammo1384,Aurisoli,MatazaD1,Bigenata,Plasbras,Auralima,BicoCB20,Wobbluna,Deveeleg,Phytpara,EctocSP7,Heteakas,Ochr2298,Noc…	[ tree 17 lh=-5644464.3715107450 ](AcanthFB:0.2441331774,((((((Ammo1384:0.7661278812,(((Aurisoli:0.3284186299,MatazaD1:0.3253444648):0.0528193399,Bigenata:0.4881398460):0.0696988711,Plasbras:0.4619154733):0.0270722374):0.0994982793,(((Auralima:0.5016231904,(BicoCB20:0.3976634002,Wobbluna:0.4967858226):0.0374595002):0.0222419926,((Deveeleg:0.3550090690,Phytpara:0.2949167074):0.0250542720,((EctocSP…
18	H17. DISPARIA sister to Discoba	-5.64442e+06	374.92	0	-	0	-	0	-	7.4e-64	-	9.75e-05	-	H17. DISPARIA sister to Discoba	(((Ancytwis,Nebumari,Nibbcura,Nibbquar,Ubysfret,Hemikukw,SpirCILI,MetesporLBC3,MetesporSRT610,Solaarie),(Andagodo,Styginca,Eugllong,Trypbruc,Naeggrub,Pharkirb)),(Ammo1384,Aurisoli,MatazaD1,Bigenata,Plasbras,Auralima,BicoCB20,Wobbluna,Deveeleg,Phytpara,EctocSP7,Heteakas,Ochr2298,Noctscin,Oxyrmari,Plasfalc,Toxogond,Vitrbras,Paratetr,Stencoer,TeloneP2,Telosubt,Goniavon,Hemimari,Guilthet,Hemirufe,Roo…	[ tree 18 lh=-5644419.3469446320 ](AcanthFB:0.2442346339,((((((Ammo1384:0.7665633907,(((Aurisoli:0.3284824569,MatazaD1:0.3254261108):0.0528500750,Bigenata:0.4883870926):0.0697683867,Plasbras:0.4621380452):0.0271824966):0.0995319009,(((Auralima:0.5019212026,(BicoCB20:0.3975673846,Wobbluna:0.4970687139):0.0376488191):0.0222932824,((Deveeleg:0.3551352763,Phytpara:0.2950178031):0.0249877056,((EctocSP…
19	H18. DISPARIA sister to Metamonada	-5.6445e+06	458.49	0	-	0	-	0	-	3.8e-137	-	1.76e-12	-	H18. DISPARIA sister to Metamonada	(((Ancytwis,Nebumari,Nibbcura,Nibbquar,Ubysfret,Hemikukw,SpirCILI,MetesporLBC3,MetesporSRT610,Solaarie),(Anaeigna,Tricvagi,Barthesp,Carpmemb,Parapyri)),(Ammo1384,Aurisoli,MatazaD1,Bigenata,Plasbras,Auralima,BicoCB20,Wobbluna,Deveeleg,Phytpara,EctocSP7,Heteakas,Ochr2298,Noctscin,Oxyrmari,Plasfalc,Toxogond,Vitrbras,Paratetr,Stencoer,TeloneP2,Telosubt,Goniavon,Hemimari,Guilthet,Hemirufe,Roomtrun,Pal…	[ tree 19 lh=-5644502.9097479787 ](AcanthFB:0.2440890060,((((((Ammo1384:0.7661359221,(((Aurisoli:0.3283313545,MatazaD1:0.3250881896):0.0528026973,Bigenata:0.4881311658):0.0697768561,Plasbras:0.4615859900):0.0270127895):0.0996180359,(((Auralima:0.5015136610,(BicoCB20:0.3972206305,Wobbluna:0.4966689524):0.0375340571):0.0223273549,((Deveeleg:0.3548217997,Phytpara:0.2948509943):0.0250077009,((EctocSP…
deltaL : logL difference from the maximal logl in the set.
bp-RELL : bootstrap proportion using RELL method (Kishino et al. 1990).
p-KH : p-value of one sided Kishino-Hasegawa test (1989).
p-SH : p-value of Shimodaira-Hasegawa test (2000).
c-ELW : Expected Likelihood Weight (Strimmer & Rambaut 2002).
p-AU : p-value of approximately unbiased (AU) test (Shimodaira, 2002).
Plus signs denote the 95% confidence sets.
Minus signs denote significant exclusion.
All tests performed 10000 resamplings using the RELL method.
